# Supplementary material for: Xuedan Sustained Release Pellets Ameliorate Dextran Sulfate Sodium–Induced Ulcerative Colitis in Rats by Targeting Gut Microbiota and MAPK Signaling Pathways
Source: Frontiers journal article supplement (doi:10.3389/fphar.2022.833972), 2022-04-20
Supplement: Data_Sheet_1.ZIP [file Figure 1D release rate.xlsx]

## Sheet: Sheet1
0 h	2 h	4 h	6 h	8 h	10 h	12 h
0	6.28	47.41	63.9	71.71	75.4	76.02
0	5.7	48.58	62.87	71.14	75.41	75.02
0	5.95	50.45	63.16	71.49	75.06	75.58
