# Supplementary material for: Xuedan Sustained Release Pellets Ameliorate Dextran Sulfate Sodium–Induced Ulcerative Colitis in Rats by Targeting Gut Microbiota and MAPK Signaling Pathways
Source: Frontiers journal article supplement (doi:10.3389/fphar.2022.833972), 2022-04-20
Supplement: Data_Sheet_1.ZIP [file Figure 2BCD.xlsx]

## Sheet: Bodyweight
	Control 1	Control 2	Control 3	Control 4	Control 5	Control 6	Control 7	Control 8	Control 9	Control 10	DSS1	DSS2	DSS3	DSS4	DSS5	DSS6	DSS7	DSS8	DSS9	DSS10	LXSP1	LXSP2	LXSP3	LXSP4	LXSP5	LXSP6	LXSP7	LXSP8	LXSP9	LXSP10	MXSP1	MXSP2	MXSP3	MXSP4	MXSP5	MXSP6	MXSP7	MXSP8	MXSP9	MXSP10	HXSP1	HXSP2	HXSP3	HXSP4	HXSP5	HXSP6	HXSP7	HXSP8	HXSP9
Day 1	262.3	257.5	256.2	268.4	278.1	265.6	265.1	258	256.6	263.1	273.3	271.4	258	256	268.5	268.1	266.1	265	255.7	258.4	266.8	264.2	258.8	255.4	255.1	269	277.8	266.5	260.4	254.4	259.9	276.5	268.7	255.1	274.5	272.4	277.7	266.5	264.3	261.6	264.8	262.3	267.8	254.4	276.7	266.8	263.3	251.8	253.6
Day 2	280.6	285.4	284.6	262.1	284.8	282	288.5	277.4	268.5	279.322	291.4	281.4	278.4	279.2	260.3	282.3	283.1	285.8	282.1	284.6	285	280	282.6	273.6	272.9	278.8	286.3	290.1	290.6	285.1	296.8	289.7	279.2	298.2	298.7	291.5	286.2	276	276.8	276.8	288.7	293.7	286.3	279.6	276.9	284.4	282.9	287.1	288.3
Day 3	302.1	296.1	292	287.1	296.7	294.4	297.6	285.8	282.4	292.7	300	280.6	288.4	288.6	301.2	294.8	295.6	296.5	281.2	288.7	292	301	306	297.1	290.8	290.6	307.6	300.4	292.3	287.2	300.6	293	306	304.3	300.4	293.9	292.5	286.3	291.1	296.5	300.1	295.1	293.3	286.2	280	302.8	296.4	278.9	288.5
Day 4	304.6	302.5	299.1	300.6	306.5	302.8	298.4	297.5	296	300.9	300.8	295.5	288.9	296.2	301.5	312.2	304.8	304	306.6	296.2	302	308	304.4	300.6	303.7	294.3	312.2	308.9	317.7	298.6	306.2	304.8	319.6	309.8	319.9	298.6	302	295.8	299.5	306	301	309.6	304.6	290.4	291.1	300	294.3	292.2	299.3
Day 5	306.1	312.5	299.6	302.5	310.6	307.3	311.5	292.9	292.3	303.9	309.4	290.2	292.4	294.2	309.8	308.7	303.6	312.8	292.9	296.1	308	306	305	297.6	304.1	309.5	311.4	307.3	319.6	302.3	305.2	307.4	316.2	319.2	311.5	305.2	302.1	297.6	305	311	302.4	287.7	296.8	286.7	294.3	301.2	297.5	291.1	306.3
Day 6	312.4	310.5	310.3	308.2	315.4	314.9	312.5	300.6	300.5	309.5	309.5	292.2	297.2	295.6	300.4	310.8	302.8	300.2	289.1	300.3	308	314	314.9	320.4	297.2	305.5	314.2	316.2	309.9	308.6	312.1	308.9	323.9	323.5	321.7	311.8	315.6	305.1	313	317.5	302.1	297.4	302.8	292.4	290.2	314.3	305.3	294.7	300.5
Day 7	310.2	320	309.2	304.6	316.2	322.3	315.4	326.2	307.8	314.7	299.3	289.1	295	291.5	309	299.8	301.9	303.5	280.8	296.2	320	312	314.4	317.2	313.3	314.6	325.1	328.6	307.7	307.8	319.7	307	324.5	323	317.8	316.5	310.6	311.4	314.5	317	309	299.2	313.4	305.5	297.9	316.9	308.4	298.1	303
Day 8	318.2	328.7	314	303.5	320.4	320.8	321.6	323.6	313.4	318.2	298	286.9	293	284.2	300.8	300.4	306.8	305.9	297.2	299.8	321	314	322	335.7	314.9	310.8	321.6	330.9	315	308.8	311.6	317.5	325.9	326.1	321.1	311.9	318.1	311.6	316	320	312.6	308.1	316.6	304.1	303.3	314.9	311.6	299.2	301.9
Day 9	319.2	334.4	320.6	316.3	323.8	329.3	322.1	336.5	313.4	324	283.1	293.4	298.3	290.6	319.4	301.2	297.5	303.1	283.8	291.2	325	313	321.6	318.9	314.6	320.2	325.8	319.4	312.7	319.2	312.8	313.1	320.4	321.7	323.2	320.9	319.2	309.2	316.5	319	311	302.3	325.2	321.9	300.9	322.4	308.1	306.8	303.9
Day 10	337.1	333	321.5	323.4	320.5	325.4	335.6	330.2	339.6	329.6	283.5	286.7	295.8	286.1	300	283.2	301.7	296.5	291.3	303.1	321.3	317.3	322.4	318.3	321.6	324.1	326.2	323.6	325.5	322.4	319.6	325.2	327	336.4	340.6	315	324.6	324.3	325	329	310.4	310.3	310.9	299	307.7	303.5	301.6	303	309
[truncated: 1 more columns]

## Sheet: DAI
	Control		DSS		SASP		LXSP		MXSP		HXSP
	Score	SD	Score	SD	Score	SD	Score	SD	Score	SD	Score	SD
Day1	0	0	0	0	0	0	0	0	0	0	0	0.27
Day2	0	0	1	0.35	0.21	0.56	0.41	0.36	0.16	0.38	0.12	0.49
Day3	0	0	0.85	0.28	0.57	0.41	0.77	0.48	0.42	0.63	0.32	0.36
Day4	0	0	1.75	0.82	0.82	0.36	1.25	0.29	0.65	0.41	0.75	0.61
Day5	0	0	2.25	0.57	1.22	0.76	1.62	0.59	0.9	0.52	1.29	0.49
Day6	0	0	3.83	1.18	2.5	0.74144	2	0.65	1.4	0.5	1.71	0.57
Day7	0	0	7.34	1.28	4.58	0.838706	3.17	0.92	2.3	0.78	3.51	1.12
Day8	0	0	7.17	1.04	4.92	1.13572	3.1	0.9	4.42	1.28	3.11	1.19
Day9	0	0	6.84	1.27	3.5	1.02456	1.4	0.4	1.3	0.4	2.56	0.95
Day10	0	0	4.78	1.07	2.59	0.758046	1.02	0.43	0.67	0.22	3.32	0.34

## Sheet: Colon length
	Colon length (cm)
Control	13.5	14	13.8	15.5	14.5	13.5	14	13.2
DSS	11	11.4	10.6	11.2	12.1	13.5	12.8	11.6
LXSP	12.6	13	11.9	12.1	12.5	12.4	12.3	11.9
MXSP	11.5	12.6	13.6	12.8	13.9	13	13	13.2
HXSP	10.2	11.6	14	11.4	11.8	12.4	13.5	12.4
