# Supplementary material for: Xuedan Sustained Release Pellets Ameliorate Dextran Sulfate Sodium–Induced Ulcerative Colitis in Rats by Targeting Gut Microbiota and MAPK Signaling Pathways
Source: Frontiers journal article supplement (doi:10.3389/fphar.2022.833972), 2022-04-20
Supplement: Data_Sheet_1.ZIP [file Figure 4.xlsx]

## Sheet: TNF-α 
		Control	DSS	LXSP	MXSP	HXSP
	1	6.625	19.946	11.844	8.616	10.04
	2	7.994	20.2177	8.819	7.945	11.102
	3	7.235	17.498	10.581	8.255	7.587
	4	9.46	20.468	11.807	10.197	8.061
	5	7.947	21.81	10.957	10.79	7.486
	6	8.277	18.16	8.129	9.899	7.561
	7	7.639	20.791	8.929	11.072	9.544

## Sheet: IL-1β
	Control	DSS	LXSP	MXSP	HXSP
1	277.729	674.786	307.283	391.616	400.07
2	291.344	620.4	342.442	377.775	387.01
3	265.219	623.25	355.848	357.387	361.357
4	270.421	625.655	334.258	366.775	449.419
5	267.57	676.714	313.374	363.758	367.339
6	282.823	704.73	311.329	370.4	392.996
7	283.612	718.58	298.07	369.895	352.225
8	280.525	649.57	327.621	352.791	442.857

## Sheet: IL-6
	Control	DSS	LXSP	MXSP	HXSP
1	8.37165	23.1108	10.4198	9.295	10.6125
2	9.451	22.1021	11.3438	10.1924	12.1963
3	9.02995	20.1776	10.1114	8.5566	11.2978
4	9.364	20.8814	11.8121	11.5579	8.56379
5	9.80022	20.7207	10.5323	8.925	9.50388
6	8.9832	21.8803	11.2446	10.0109	8.6032
7	8.93982	22.0983	10.7441	9.5011	10.4797
8	9.102	21.6888	12.3847	9.88257	10.328

## Sheet: IL-10
	Control	DSS	LXSP	MXSP	HXSP
1	21.9103	13.8862	21.6117	23.1	20.19
2	22.8298	12.766	22.029	22.529	19.141
3	20.8512	13.4705	22.2191	22.842	19.243
4	21.6021	13.5597	22.416	20.814	21.63
5	20.9665	13.6175	23.089	22.803	20.668
6	20.5051	12.868	21.3038	21.229	22.15
7	20.4915	12.9622	20.103	21.261	18.284
8	21.6938	12.7941	22.3071	21.789	19.103
