# Supplementary material for: Xuedan Sustained Release Pellets Ameliorate Dextran Sulfate Sodium–Induced Ulcerative Colitis in Rats by Targeting Gut Microbiota and MAPK Signaling Pathways
Source: Frontiers journal article supplement (doi:10.3389/fphar.2022.833972), 2022-04-20
Supplement: Data_Sheet_1.ZIP [file Figure 5A-PCA.xls]

group	axis1	axis2	axis3
Contr1	-0.0050364496762047226	-0.004626602187230101	-0.01204644344914766
Contr2	-0.009389741956721282	0.017755102690104455	-0.006842079020818136
Contr3	-0.005488622285673247	0.007408861813854492	0.00938272972708912
Contr4	-0.005783085727378056	0.006592848987341384	0.004155921508467382
Contr5	-0.004617006485582401	0.0038200553598828147	0.005999233061536026
DSS1	-0.002965318238160764	-0.013489846052171357	0.005360402588844115
DSS2	0.016054293797861184	-0.001440386942557531	-0.0020204909758441978
DSS3	-0.0008515590330593118	-0.013885590135941994	-0.005289612839490528
DSS4	0.029703344557467835	0.007593672886494146	0.0023827185373470876
DSS5	-0.0036670702067258232	-0.015512954402961444	-0.018428320965419746
MXSP1	0.004567903872056121	0.005389888309688426	-0.012655041871948533
MXSP2	-0.004159907109091915	-0.01163028648677934	0.02219298910003326
MXSP3	0.004377365215278357	-0.006327918662779172	0.007640334236720277
MXSP4	-0.006526804439111876	0.00806998138460836	-0.004897473850352423
MXSP5	-0.006217342284954096	0.010283173438446922	0.005065134212983979
