# Supplementary material for: Xuedan Sustained Release Pellets Ameliorate Dextran Sulfate Sodium–Induced Ulcerative Colitis in Rats by Targeting Gut Microbiota and MAPK Signaling Pathways
Source: Frontiers journal article supplement (doi:10.3389/fphar.2022.833972), 2022-04-20
Supplement: Data_Sheet_1.ZIP [file Figure 5A-PCoA.xls]

sample	group	PC1	PC2	PC3	PC4	PC5	PC6	PC7	PC8	PC9	PC10	PC11	PC12	PC13	PC14	PC15
Contr1	Contr	0.0361	0.0377	-0.0038	-0.1745	0.0373	0.0139	0.0125	0.0264	0.0780	-0.0199	0.0034	0.0057	0.0578	-0.0247	0.0000
Contr2	Contr	-0.2393	-0.0218	-0.0127	0.0091	-0.0154	0.0143	-0.0075	0.0018	0.0467	-0.0096	-0.0946	-0.0173	-0.0528	-0.0259	0.0000
Contr3	Contr	-0.2900	-0.0201	-0.0330	-0.0102	0.0030	-0.0772	0.0378	-0.0087	0.0050	0.0363	0.0055	-0.0769	0.0265	0.0290	0.0000
Contr4	Contr	-0.1949	0.0310	0.0160	-0.0192	-0.0148	0.1428	-0.0957	-0.0103	-0.0807	0.0005	-0.0016	-0.0145	0.0259	0.0023	0.0000
Contr5	Contr	-0.2554	-0.0114	-0.0307	0.0318	-0.0124	-0.0398	-0.0128	-0.0023	0.0169	-0.0026	-0.0255	0.0907	0.0216	0.0314	0.0000
DSS1	DSS	0.1207	0.0910	0.0654	0.0848	0.1410	-0.0932	-0.1005	0.0259	-0.0115	0.0236	-0.0037	-0.0032	0.0042	-0.0137	0.0000
DSS2	DSS	0.1459	-0.1427	0.0179	0.0196	-0.0642	-0.0126	0.0101	0.1579	-0.0370	-0.0210	-0.0055	-0.0051	0.0036	0.0027	0.0000
DSS3	DSS	0.1182	0.0222	0.1246	0.0380	-0.0712	-0.0334	-0.0174	-0.0650	0.0167	-0.1131	0.0080	-0.0188	0.0027	0.0113	0.0000
DSS4	DSS	0.2049	-0.2814	-0.0524	0.0058	0.0578	0.0153	-0.0207	-0.0836	0.0074	0.0192	0.0043	0.0028	0.0037	-0.0034	0.0000
DSS5	DSS	0.1607	0.0435	0.1486	0.0177	-0.1379	0.0033	0.0214	-0.0297	0.0150	0.0957	-0.0041	0.0107	0.0072	-0.0089	0.0000
MXSP1	MXSP	0.2328	0.1165	-0.2610	0.0426	-0.0855	-0.0088	-0.0283	-0.0092	0.0083	-0.0002	0.0084	-0.0066	-0.0026	-0.0023	0.0000
MXSP2	MXSP	-0.0593	0.0226	0.0235	0.0813	0.0540	0.0960	0.0159	0.0368	0.0890	0.0072	0.0708	-0.0017	-0.0351	0.0147	0.0000
MXSP3	MXSP	0.1742	0.0816	-0.0003	0.0575	0.0967	0.0527	0.1361	-0.0148	-0.0520	-0.0108	-0.0451	0.0035	0.0135	0.0052	0.0000
MXSP4	MXSP	0.1175	0.0439	0.0157	-0.1976	0.0264	-0.0251	-0.0065	-0.0054	-0.0410	0.0090	0.0100	0.0100	-0.0624	0.0239	0.0000
MXSP5	MXSP	-0.2721	-0.0126	-0.0176	0.0133	-0.0148	-0.0481	0.0555	-0.0197	-0.0607	-0.0145	0.0697	0.0206	-0.0139	-0.0415	0.0000
