# Supplementary material for: Xuedan Sustained Release Pellets Ameliorate Dextran Sulfate Sodium–Induced Ulcerative Colitis in Rats by Targeting Gut Microbiota and MAPK Signaling Pathways
Source: Frontiers journal article supplement (doi:10.3389/fphar.2022.833972), 2022-04-20
Supplement: Data_Sheet_1.ZIP [file Figure 5B.xls]

family	Contr1	Contr2	Contr3	Contr4	Contr5	DSS1	DSS2	DSS3	DSS4	DSS5	MXSP1	MXSP2	MXSP3	MXSP4	MXSP5
Lactobacillaceae	0.22865304956395438	0.4356896129679968	0.18043353430972928	0.27297231422113616	0.29654173615366636	0.03578582108501109	0.044683746368955043	0.04246989175939033	0.010003218538796169	0.1036361928029711	0.2649234093239403	0.06942119110258409	0.05326856801723194	0.3557975881101083	0.23517549261111242
Ruminococcaceae	0.14175117840297172	0.08855767400109936	0.10928797014083604	0.09756692044104867	0.23025834576774087	0.2264930741670702	0.04787637714905183	0.21068317596195205	0.06775667846797405	0.23591629642593423	0.05339187280128798	0.21609662760095044	0.08770453990395259	0.11871112798203615	0.18088054187208646
Lachnospiraceae	0.10229967147597958	0.09275981178769932	0.21950904392767065	0.2712374725791353	0.12835366745685556	0.14217000028204405	0.023879308088875974	0.11589471259997362	0.008084969423876903	0.03705990523618966	0.015179634913196582	0.4025053814879077	0.19753873707611846	0.10218413291703111	0.2387007389161141
Bacteroidaceae	0.2378803028139525	0.002203062528899984	0.0014068331897778893	0.0004874761638492432	0.003262237046136329	0.21144243518506553	0.1104336220658889	0.28462278336993524	0.06816865143217389	0.30850592609491395	0.2020304146699545	0.07161863190618356	0.08390545711115033	0.10161473997703095	0.0014778325123207064
Enterobacteriaceae	0.0010141408370197974	0.00042157369380199693	0.0001722652885437416	0.0019068920527009513	0.00215044325462758	0.0021863627387406774	0.3116609530786864	0.02817779102369359	0.5288316704217975	0.004912685735758629	0.1842469737679585	0.00313920114804928	0.11893842772207132	0.0007445907670742266	0.002570812807881229
Muribaculaceae	0.04703613769459061	0.1105747001389992	0.16395348837175402	0.20560024087110257	0.18427982094279263	0.011510141902003567	0.00334964540862663	0.11081458200697479	0.0017508850981693292	0.05422746003408486	0.018988393673295724	0.04903133221718875	0.032360044503519404	0.023023914503507013	0.1270012315270607
Peptostreptococcaceae	0.035909155834892834	0.10771887834199921	0.003201263278775198	0.026653476135213298	0.011308113168887274	0.15545744350704818	0.06127495878363835	0.03358304997489235	0.017714837463793213	0.1348169823219624	0.0010803024846997567	0.03823845969859123	0.008832867493425297	0.020731742926406317	0.0011391625615805444
Erysipelotrichaceae	0.04190829881449163	0.01816846628769987	0.0009474590869925785	0.014036446012007	0.004988443196104386	0.051964905351716106	0.10293617355389645	0.03653629922649169	0.04679755391048208	0.04751614072288675	0.0706351624608841	0.018850155465195678	0.12018669778307206	0.020133150348906132	0.001878078817730898
Tannerellaceae	0.058934437937388236	0.0001495906655419989	0.00020097616996769845	0.0007598893142363791	0.0004096082389765391	0.03588456004741112	0.05643367440394323	0.031198775349892897	0.005806243965237776	0.022885598850993616	0.05922273621228668	0.0414225065773905	0.12615668502907565	0.061844833124118835	0.00026169950738912513
Burkholderiaceae	0.025739180117094862	0.0009111431446679933	7.177720355999231e-05	0.008315769853904148	0.0023991339711473005	0.01784354106130553	0.04040509774155935	0.05524472682438744	0.03700032185388583	0.018791694071194756	0.0901775574083797	0.0072201626405183445	0.09963094624305974	0.03125821239820952	0.00024630541871911775
Others	0.07887444650766398	0.14284548644159425	0.3208153890323928	0.10046310235566638	0.1360484508030652	0.10926171467258414	0.1970664433568777	0.05077421190241595	0.20808496942381313	0.031731117703110046	0.04012354228411605	0.08245635015544064	0.07147702911732316	0.1639559669455711	0.21066810344800477
