# Supplementary material for: Xuedan Sustained Release Pellets Ameliorate Dextran Sulfate Sodium–Induced Ulcerative Colitis in Rats by Targeting Gut Microbiota and MAPK Signaling Pathways
Source: Frontiers journal article supplement (doi:10.3389/fphar.2022.833972), 2022-04-20
Supplement: Data_Sheet_1.ZIP [file Figure 5C.xls]

genus	Contr1	Contr2	Contr3	Contr4	Contr5	DSS1	DSS2	DSS3	DSS4	DSS5	MXSP1	MXSP2	MXSP3	MXSP4	MXSP5
Lactobacillus	0.2286530495640851	0.43568961296796693	0.18043353430981438	0.2729723142209879	0.29654173615380314	0.03578582108500451	0.04468374636896952	0.04246989175937471	0.010003218538798316	0.10363619280298286	0.26492340932402114	0.06942119110258113	0.053268568017188246	0.35579758811012835	0.23517549261106854
Bacteroides	0.2378803028140885	0.0022030625288998328	0.0014068331897785528	0.00048747616384897836	0.0032622370461378343	0.21144243518502667	0.11043362206592468	0.2846227833698306	0.06816865143218852	0.308505926094949	0.20203041467001612	0.07161863190618052	0.08390545711108151	0.10161473997703668	0.0014778325123204308
Escherichia-Shigella	0.0009284387944583455	0.00024478472543298143	0.00017226528854382285	0.001691829039239925	0.0020919277919186114	0.0018055124552102276	0.30981603119378864	0.02792039774038338	0.5279819761829112	0.004510006577089254	0.18230796930801454	0.002645898110499281	0.11773086211997405	0.000642392034339232	0.002540024630540741
Lachnospiraceae_NK4A136_group	0.049135837737518284	0.05642287921229573	0.13664944013785943	0.15842975325099296	0.03471429825327696	0.07546477840160953	0.010519980111492822	0.07469824024275554	0.00154489861602974	0.025341941718895807	0.007257416692060579	0.3186737622579134	0.1285989525389716	0.05877887114202121	0.04268780788181245
uncultured_bacterium_f_Muribaculaceae	0.04703613769461751	0.11057470013899161	0.16395348837183135	0.20560024087099088	0.18427982094287765	0.011510141902001452	0.003349645408627715	0.11081458200693403	0.0017508850981697052	0.05422746003409101	0.018988393673301514	0.049031332217186675	0.03236004450349286	0.02302391450350831	0.12700123152703702
uncultured_bacterium_f_Lachnospiraceae	0.03355234966431248	0.03282835151089751	0.05587137525114251	0.09987526345219556	0.05901284414406082	0.05652100318790713	0.010376050035292923	0.03794518877767741	0.005831992275509019	0.009221352733518475	0.002783856402870222	0.0629036115761829	0.06664676670918529	0.027856454580010053	0.09696736453202827
Romboutsia	0.035909155834913366	0.10771887834199183	0.0032012632787767076	0.02665347613519882	0.011308113168892492	0.1554574435070196	0.0612749587836582	0.03358304997488001	0.01771483746379702	0.1348169823219777	0.0010803024847000863	0.038238459698589605	0.00883286749341805	0.020731742926407486	0.0011391625615803321
Parabacteroides	0.05893443793742193	0.00014959066554198864	0.00020097616996779324	0.0007598893142359664	0.0004096082389767281	0.03588456004740453	0.056433674403961506	0.031198775349881427	0.005806243965239022	0.022885598850996215	0.05922273621230474	0.041422506577388746	0.12615668502897218	0.061844833124122325	0.0002616995073890763
Parasutterella	0.025710612769609568	0.0008023499333639391	7.177720356002616e-05	0.00831576985389963	0.0023991339711484073	0.017787118797102243	0.03926674168477322	0.05506861563046722	0.03640811071769387	0.01864404504639692	0.09012215728100718	0.00710057402534807	0.09953596917317803	0.03118521330341126	0.00018472906403905386
uncultured_bacterium_f_Spirochaetaceae	8.570204256533189e-05	0.02624636222699801	0.19408555842680034	0.0382382037936983	0.015813803797689503	0.0	0.00017009918090688398	6.773507457625968e-05	5.149662053429133e-05	0.00012080374760098004	9.695022298550774e-05	0.0003139201148049147	1.3568152831697004e-05	4.379945688671581e-05	0.12050492610803513
Others	0.28217397514640963	0.2271194277476196	0.26395348837192545	0.18697578390471126	0.39016647649121755	0.39834118543171454	0.35367545076260365	0.3016107400732394	0.3247376890891295	0.31808969007150173	0.1711863937287187	0.33863011241332525	0.28295025915170635	0.3184804508421282	0.372059729064149
