# Supplementary material for: Xuedan Sustained Release Pellets Ameliorate Dextran Sulfate Sodium–Induced Ulcerative Colitis in Rats by Targeting Gut Microbiota and MAPK Signaling Pathways
Source: Frontiers journal article supplement (doi:10.3389/fphar.2022.833972), 2022-04-20
Supplement: Data_Sheet_1.ZIP [file Figure 6.xlsx]

## Sheet: Sheet1
	Propanic acid
	Control	DSS	LXSP	MXSP	HXSP
	1.4174	0.7543	1.0712	1.2101	1.7055
	1.2125	0.8747	1.1025	1.4012	1.7757
	1.3113	0.3599	0.9776	1.0109	1.5347
	Acetic acid
	Control	DSS	LXSP	MXSP	HXSP
	6.4776	2.5003	6.0607	7.2024	4.1879
	7.6659	2.1214	8.5522	6.6055	7.8733
	5.9026	3.5396	6.5258	5.8996	8.0092
	Botanoic acid
	Control	DSS	LXSP	MXSP	HXSP
	3.8011	0.7714	1.647	2.8523	2.3094
	5.1662	1.0895	0.862	2.4444	2.8991
	4.1424	0.9558	2.1959	2.2719	3.0464
	Pentanoic acid
	Control	DSS	LXSP	MXSP	HXSP
	0.1505	0	0	0.1492	0.13806
	0.2205	0	0	0.1135	0.2086
	0.14908	0	0.1124	0.132	0.2597
	Caproic acid
	Control	DSS	LXSP	MXSP	HXSP
	0.0371	0	0.0597	0.05	0.04
	0.0535	0	0.04	0.0706	0.101
	0.0501	0	0.03	0.0304	0.0602
