# Supplementary material for: Xuedan Sustained Release Pellets Ameliorate Dextran Sulfate Sodium–Induced Ulcerative Colitis in Rats by Targeting Gut Microbiota and MAPK Signaling Pathways
Source: Frontiers journal article supplement (doi:10.3389/fphar.2022.833972), 2022-04-20
Supplement: Data_Sheet_1.ZIP [file Figure 7B-1.xls]

## Sheet: 表达量差异统计表
Gene_id	Gene_name	Gene_description	Model_vs_XSP	Sum
1638			1638	1638
ENSRNOG00000014555	Aox4	aldehyde oxidase 4 [Source:RGD Symbol;Acc:1311975]	yes|down	1
ENSRNOG00000020719	Hrc	histidine rich calcium binding protein [Source:RGD Symbol;Acc:727864]	yes|up	1
ENSRNOG00000020309	Gfra3	GDNF family receptor alpha 3 [Source:RGD Symbol;Acc:620502]	yes|down	1
ENSRNOG00000042460	Hmga2	high mobility group AT-hook 2 [Source:RGD Symbol;Acc:620617]	yes|up	1
ENSRNOG00000017311	Me3	malic enzyme 3 [Source:RGD Symbol;Acc:1311070]	yes|up	1
ENSRNOG00000042464	Fbxo25	F-box protein 25 [Source:MGI Symbol;Acc:MGI:1914072]	yes|up	1
ENSRNOG00000042465	Zbtb32	zinc finger and BTB domain containing 32 [Source:RGD Symbol;Acc:1584121]	yes|down	1
ENSRNOG00000020714	Trpm4	transient receptor potential cation channel, subfamily M, member 4 [Source:RGD Symbol;Acc:620244]	yes|up	1
ENSRNOG00000005115	Asf1b	anti-silencing function 1B histone chaperone [Source:RGD Symbol;Acc:1304918]	yes|down	1
ENSRNOG00000011078	Srm	spermidine synthase [Source:RGD Symbol;Acc:620796]	yes|down	1
ENSRNOG00000002946	Socs3	suppressor of cytokine signaling 3 [Source:RGD Symbol;Acc:621087]	yes|down	1
ENSRNOG00000030788	Olr35	olfactory receptor 35 [Source:RGD Symbol;Acc:1333428]	yes|up	1
ENSRNOG00000027831	Map7d3	MAP7 domain containing 3 [Source:RGD Symbol;Acc:1565514]	yes|up	1
ENSRNOG00000030930	Samsn1	SAM domain, SH3 domain and nuclear localization signals, 1 [Source:RGD Symbol;Acc:620926]	yes|down	1
ENSRNOG00000013658	Nefl	neurofilament light [Source:RGD Symbol;Acc:621458]	yes|up	1
ENSRNOG00000051825	AABR07005535.1		yes|up	1
ENSRNOG00000011483	S100a9	S100 calcium binding protein A9 [Source:RGD Symbol;Acc:620267]	yes|down	1
ENSRNOG00000009401	Lmo2	LIM domain only 2 [Source:RGD Symbol;Acc:1307101]	yes|down	1
ENSRNOG00000010888	Ankrd33b	ankyrin repeat domain 33B [Source:RGD Symbol;Acc:1564227]	yes|down	1
ENSRNOG00000021546	Sit1	signaling threshold regulating transmembrane adaptor 1 [Source:RGD Symbol;Acc:1559919]	yes|down	1
ENSRNOG00000021669	Mybl1	MYB proto-oncogene like 1 [Source:RGD Symbol;Acc:1306940]	yes|down	1
ENSRNOG00000006494	Tubg2	tubulin, gamma 2 [Source:RGD Symbol;Acc:1585798]	yes|down	1
ENSRNOG00000009870	Tmem88	transmembrane protein 88 [Source:RGD Symbol;Acc:1561781]	yes|down	1
ENSRNOG00000029776	AABR07065823.1		yes|down	1
ENSRNOG00000013376	Mvd	mevalonate diphosphate decarboxylase [Source:RGD Symbol;Acc:621292]	yes|down	1
ENSRNOG00000009970	Gsdme	gasdermin E [Source:MGI Symbol;Acc:MGI:1889850]	yes|up	1
ENSRNOG00000030494	AABR07072761.1		yes|up	1
ENSRNOG00000053889	Celsr3	cadherin, EGF LAG seven-pass G-type receptor 3 [Source:RGD Symbol;Acc:621787]	yes|up	1
ENSRNOG00000015736	Dhrs3	dehydrogenase/reductase 3 [Source:RGD Symbol;Acc:1305584]	yes|up	1
ENSRNOG00000018827	Htr7	5-hydroxytryptamine receptor 7 [Source:RGD Symbol;Acc:71034]	yes|down	1
ENSRNOG00000009580	Lca5	LCA5, lebercilin [Source:RGD Symbol;Acc:1308555]	yes|down	1
ENSRNOG00000001224	Itgb2	integrin subunit beta 2 [Source:RGD Symbol;Acc:1305581]	yes|down	1
ENSRNOG00000005947	Pde6h	phosphodiesterase 6H [Source:RGD Symbol;Acc:70933]	yes|down	1
ENSRNOG00000033087	Cdh23	cadherin 23 (otocadherin) [Source:MGI Symbol;Acc:MGI:1890219]	yes|up	1
ENSRNOG00000027784	Tsku	tsukushi, small leucine rich proteoglycan [Source:RGD Symbol;Acc:1359311]	yes|up	1
ENSRNOG00000003915	Tmem206	transmembrane protein 206 [Source:RGD Symbol;Acc:1359339]	yes|down	1
ENSRNOG00000027787	Cdc6	cell division cycle 6 [Source:RGD Symbol;Acc:1309157]	yes|down	1
ENSRNOG00000051770	Cyp2w1	cytochrome P450, family 2, subfamily w, polypeptide 1 [Source:RGD Symbol;Acc:1305193]	yes|up	1
ENSRNOG00000010071	RGD1560010	RGD1560010 [Source:RGD Symbol;Acc:1560010]	yes|down	1
ENSRNOG00000005278	Trhde	thyrotropin-releasing hormone degrading enzyme [Source:RGD Symbol;Acc:728895]	yes|up	1
ENSRNOG00000017429	Lat	linker for activation of T cells [Source:RGD Symbol;Acc:620802]	yes|down	1
ENSRNOG00000004839	B4galnt1	beta-1,4-N-acetyl-galactosaminyl transferase 1 [Source:RGD Symbol;Acc:620490]	yes|down	1
ENSRNOG00000009907	Mmp8	matrix metallopeptidase 8 [Source:RGD Symbol;Acc:631408]	yes|down	1
ENSRNOG00000050697	Ctsz	cathepsin Z [Source:RGD Symbol;Acc:708479]	yes|down	1
ENSRNOG00000033192	Osmr	oncostatin M receptor [Source:RGD Symbol;Acc:1302983]	yes|down	1
ENSRNOG00000021713	Kif18b	kinesin family member 18B [Source:RGD Symbol;Acc:1310360]	yes|down	1
ENSRNOG00000020628	LOC100361913	rCG54286-like [Source:RGD Symbol;Acc:2319167]	yes|up	1
ENSRNOG00000020625	Mcpt2	mast cell protease 2 [Source:RGD Symbol;Acc:621058]	yes|up	1
ENSRNOG00000016890	Tppp3	tubulin polymerization-promoting protein family member 3 [Source:RGD Symbol;Acc:1305061]	yes|up	1
ENSRNOG00000031782	Col6a4	collagen, type VI, alpha 4 [Source:RGD Symbol;Acc:1564060]	yes|up	1
ENSRNOG00000045857	Tmed8	transmembrane p24 trafficking protein 8 [Source:MGI Symbol;Acc:MGI:1923480]	yes|down	1
ENSRNOG00000018915	Tagap	T-cell activation RhoGTPase activating protein [Source:RGD Symbol;Acc:1308618]	yes|down	1
ENSRNOG00000050675	Myl4	myosin, light chain 4 [Source:RGD Symbol;Acc:1591197]	yes|down	1
ENSRNOG00000004642	Lmx1a	LIM homeobox transcription factor 1 alpha [Source:RGD Symbol;Acc:1304784]	yes|up	1
ENSRNOG00000019850	Speg	striated muscle enriched protein kinase [Source:RGD Symbol;Acc:2124]	yes|up	1
ENSRNOG00000011777	Spag5	sperm associated antigen 5 [Source:RGD Symbol;Acc:620152]	yes|down	1
ENSRNOG00000010575	Dapp1	dual adaptor of phosphotyrosine and 3-phosphoinositides 1 [Source:RGD Symbol;Acc:1310189]	yes|down	1
ENSRNOG00000019660	Spib	Spi-B transcription factor [Source:RGD Symbol;Acc:1565899]	yes|down	1
ENSRNOG00000009050	Amn	amnion associated transmembrane protein [Source:RGD Symbol;Acc:1308634]	yes|up	1
ENSRNOG00000050071	Cdc45	cell division cycle 45 [Source:RGD Symbol;Acc:1590928]	yes|down	1
ENSRNOG00000000091	LOC103691556	mothers against decapentaplegic homolog 9 [Source:RGD Symbol;Acc:9309512]	yes|up	1
ENSRNOG00000009054	Elmod1	ELMO domain containing 1 [Source:RGD Symbol;Acc:1564186]	yes|up	1
ENSRNOG00000000653	Nr5a2	nuclear receptor subfamily 5, group A, member 2 [Source:RGD Symbol;Acc:68353]	yes|up	1
ENSRNOG00000035560	Mir150	microRNA 150 [Source:RGD Symbol;Acc:2325455]	yes|down	1
ENSRNOG00000028845	Ebf1	EBF transcription factor 1 [Source:RGD Symbol;Acc:620953]	yes|down	1
ENSRNOG00000055103	Cftr	cystic fibrosis transmembrane conductance regulator [Source:RGD Symbol;Acc:2332]	yes|up	1
ENSRNOG00000038319	Akr1c19	aldo-keto reductase family 1, member C19 [Source:RGD Symbol;Acc:1562954]	yes|up	1
ENSRNOG00000016962	Neu2	neuraminidase 2 [Source:RGD Symbol;Acc:3164]	yes|up	1
ENSRNOG00000020531	Fen1	flap structure-specific endonuclease 1 [Source:RGD Symbol;Acc:621821]	yes|down	1
ENSRNOG00000038572	Ncapg	non-SMC condensin I complex, subunit G [Source:RGD Symbol;Acc:1562646]	yes|down	1
ENSRNOG00000008904	Fli1	Fli-1 proto-oncogene, ETS transcription factor [Source:RGD Symbol;Acc:1309837]	yes|down	1
ENSRNOG00000053812	LOC103689947	selenium-binding protein 1 [Source:RGD Symbol;Acc:9292945]	yes|up	1
ENSRNOG00000006963	Ctse	cathepsin E [Source:RGD Symbol;Acc:2446]	yes|down	1
ENSRNOG00000051401	AABR07049156.1		yes|up	1
ENSRNOG00000009324	LOC103692166	WD repeat-containing protein 54 [Source:RGD Symbol;Acc:9477816]	yes|up	1
ENSRNOG00000012611	Lpxn	leupaxin [Source:RGD Symbol;Acc:1304981]	yes|down	1
ENSRNOG00000010319	Lcp1	lymphocyte cytosolic protein 1 [Source:RGD Symbol;Acc:1308288]	yes|down	1
ENSRNOG00000010315	Ccr4	C-C motif chemokine receptor 4 [Source:RGD Symbol;Acc:620594]	yes|down	1
ENSRNOG00000010701	Depdc1b	DEP domain containing 1B [Source:RGD Symbol;Acc:1305799]	yes|down	1
ENSRNOG00000004393	Fcamr	Fc fragment of IgA and IgM receptor [Source:RGD Symbol;Acc:1584674]	yes|down	1
ENSRNOG00000003866	Cxcr4	C-X-C motif chemokine receptor 4 [Source:RGD Symbol;Acc:620465]	yes|down	1
ENSRNOG00000055076	AABR07025023.1		yes|down	1
ENSRNOG00000059387	AABR07067233.1		yes|up	1
ENSRNOG00000011654	Plk4	polo-like kinase 4 [Source:RGD Symbol;Acc:1305390]	yes|down	1
ENSRNOG00000049115	Ccr5	C-C motif chemokine receptor 5 [Source:RGD Symbol;Acc:620596]	yes|down	1
ENSRNOG00000055078	Cyp4b1	cytochrome P450, family 4, subfamily b, polypeptide 1 [Source:RGD Symbol;Acc:2480]	yes|up	1
ENSRNOG00000011550	Kcnab2	potassium voltage-gated channel subfamily A regulatory beta subunit 2 [Source:RGD Symbol;Acc:61828]	yes|down	1
ENSRNOG00000004498	Scin	scinderin [Source:RGD Symbol;Acc:735034]	yes|up	1
ENSRNOG00000014791	Peg3	paternally expressed 3 [Source:RGD Symbol;Acc:2323590]	yes|up	1
ENSRNOG00000014793	Gpr149	G protein-coupled receptor 149 [Source:RGD Symbol;Acc:619890]	yes|up	1
ENSRNOG00000031168	Arhgap15	Rho GTPase activating protein 15 [Source:RGD Symbol;Acc:1359304]	yes|down	1
ENSRNOG00000014018	St8sia1	ST8 alpha-N-acetyl-neuraminide alpha-2,8-sialyltransferase 1 [Source:RGD Symbol;Acc:3679]	yes|down	1
ENSRNOG00000027017	Rnasel	ribonuclease L [Source:RGD Symbol;Acc:727933]	yes|up	1
ENSRNOG00000039357	Fam129c	family with sequence similarity 129, member C [Source:RGD Symbol;Acc:1566103]	yes|down	1
ENSRNOG00000017680	Dennd2d	DENN domain containing 2D [Source:RGD Symbol;Acc:1305120]	yes|down	1
ENSRNOG00000017686	Pi15	peptidase inhibitor 15 [Source:RGD Symbol;Acc:1309577]	yes|down	1
ENSRNOG00000023208	Myorg	myogenesis regulating glycosidase [Source:RGD Symbol;Acc:1309821]	yes|up	1
ENSRNOG00000005540	Nin	ninein [Source:RGD Symbol;Acc:1306492]	yes|down	1
ENSRNOG00000011680	Il16	interleukin 16 [Source:RGD Symbol;Acc:1583872]	yes|down	1
ENSRNOG00000010950	Cep41	centrosomal protein 41 [Source:RGD Symbol;Acc:1562034]	yes|down	1
ENSRNOG00000011424	Cldn23	claudin 23 [Source:RGD Symbol;Acc:1309001]	yes|up	1
ENSRNOG00000037524	Adam6	a disintegrin and metallopeptidase domain 6 [Source:RGD Symbol;Acc:621472]	yes|down	1
ENSRNOG00000032410	Mtus2	microtubule associated scaffold protein 2 [Source:RGD Symbol;Acc:1562533]	yes|up	1
ENSRNOG00000028261	Tppp	tubulin polymerization promoting protein [Source:RGD Symbol;Acc:1310121]	yes|up	1
ENSRNOG00000011421	Smap2	small ArfGAP2 [Source:RGD Symbol;Acc:1308418]	yes|down	1
ENSRNOG00000016337	Slc22a1	solute carrier family 22 member 1 [Source:RGD Symbol;Acc:3224]	yes|up	1
ENSRNOG00000010165	Tnfaip2	TNF alpha induced protein 2 [Source:RGD Symbol;Acc:1594556]	yes|down	1
ENSRNOG00000002792	Cxcl2	C-X-C motif chemokine ligand 2 [Source:RGD Symbol;Acc:70069]	yes|down	1
ENSRNOG00000002793	Sstr2	somatostatin receptor 2 [Source:RGD Symbol;Acc:3763]	yes|up	1
ENSRNOG00000052518	AABR07025387.1		yes|up	1
ENSRNOG00000048222	Nlrc5	NLR family, CARD domain containing 5 [Source:RGD Symbol;Acc:1309166]	yes|down	1
ENSRNOG00000048053	AC128859.3		yes|down	1
ENSRNOG00000045846	Rfx2	regulatory factor X2 [Source:RGD Symbol;Acc:1588579]	yes|up	1
ENSRNOG00000018454	Apoe	apolipoprotein E [Source:RGD Symbol;Acc:2138]	yes|down	1
ENSRNOG00000021334	Lag3	lymphocyte activating 3 [Source:RGD Symbol;Acc:1302990]	yes|down	1
ENSRNOG00000045843	Rusc2	RUN and SH3 domain containing 2 [Source:RGD Symbol;Acc:1592688]	yes|up	1
ENSRNOG00000018599	Gga2	golgi associated, gamma adaptin ear containing, ARF binding protein 2 [Source:RGD Symbol;Acc:1304800]	yes|down	1
ENSRNOG00000026128	Cpne8	copine 8 [Source:RGD Symbol;Acc:1307939]	yes|down	1
ENSRNOG00000017619	Aldh1a1	aldehyde dehydrogenase 1 family, member A1 [Source:RGD Symbol;Acc:2087]	yes|up	1
ENSRNOG00000014125	Evi2b	ecotropic viral integration site 2B [Source:RGD Symbol;Acc:6495961]	yes|down	1
ENSRNOG00000010919	Mbd4	methyl-CpG binding domain 4 DNA glycosylase [Source:RGD Symbol;Acc:1585874]	yes|down	1
ENSRNOG00000003468	Capn8	calpain 8 [Source:RGD Symbol;Acc:620085]	yes|up	1
ENSRNOG00000060439	AABR07012131.1		yes|down	1
ENSRNOG00000010798	Blk	BLK proto-oncogene, Src family tyrosine kinase [Source:RGD Symbol;Acc:1308859]	yes|down	1
ENSRNOG00000060434	AABR07053500.2		yes|up	1
ENSRNOG00000008134	Mefv	MEFV, pyrin innate immunity regulator [Source:RGD Symbol;Acc:61889]	yes|down	1
ENSRNOG00000018384	Adam12	ADAM metallopeptidase domain 12 [Source:RGD Symbol;Acc:1583652]	yes|down	1
ENSRNOG00000022521	Ddias	DNA damage-induced apoptosis suppressor [Source:RGD Symbol;Acc:1559690]	yes|down	1
ENSRNOG00000060693	Catsperg	cation channel sperm associated auxiliary subunit gamma [Source:RGD Symbol;Acc:1310942]	yes|up	1
ENSRNOG00000018577	Neil1	nei-like DNA glycosylase 1 [Source:RGD Symbol;Acc:1306077]	yes|down	1
ENSRNOG00000037456	P2rx2	purinergic receptor P2X 2 [Source:RGD Symbol;Acc:620251]	yes|up	1
ENSRNOG00000052205	Fgf23	fibroblast growth factor 23 [Source:RGD Symbol;Acc:620178]	yes|down	1
ENSRNOG00000011296	Cenpn	centromere protein N [Source:RGD Symbol;Acc:1310953]	yes|down	1
ENSRNOG00000007049	Bcl11a	BCL11A, BAF complex component [Source:RGD Symbol;Acc:1309923]	yes|down	1
ENSRNOG00000016413	Pstpip1	proline-serine-threonine phosphatase-interacting protein 1 [Source:RGD Symbol;Acc:1307557]	yes|down	1
ENSRNOG00000008091	Gins1	GINS complex subunit 1 [Source:RGD Symbol;Acc:1562246]	yes|down	1
ENSRNOG00000016148	Gtse1	G-2 and S-phase expressed 1 [Source:RGD Symbol;Acc:1563164]	yes|down	1
ENSRNOG00000022009	Mzb1	marginal zone B and B1 cell-specific protein [Source:RGD Symbol;Acc:1310251]	yes|down	1
ENSRNOG00000060448	Hand2	heart and neural crest derivatives expressed 2 [Source:NCBI gene;Acc:64637]	yes|up	1
ENSRNOG00000047697	Ggt1	gamma-glutamyltransferase 1 [Source:RGD Symbol;Acc:2683]	yes|down	1
ENSRNOG00000014333	Vcam1	vascular cell adhesion molecule 1 [Source:RGD Symbol;Acc:3952]	yes|down	1
ENSRNOG00000008005	Akna	AT-hook transcription factor [Source:RGD Symbol;Acc:1308202]	yes|down	1
ENSRNOG00000038894	AABR07072096.1		yes|down	1
ENSRNOG00000014336	Mcm5	minichromosome maintenance complex component 5 [Source:RGD Symbol;Acc:1306616]	yes|down	1
ENSRNOG00000060329	Emb	embigin [Source:RGD Symbol;Acc:621067]	yes|down	1
ENSRNOG00000055650	Pou2f2	POU class 2 homeobox 2 [Source:RGD Symbol;Acc:621690]	yes|down	1
ENSRNOG00000001823	St6gal1	ST6 beta-galactoside alpha-2,6-sialyltransferase 1 [Source:RGD Symbol;Acc:3676]	yes|down	1
ENSRNOG00000005609	Neurod1	neuronal differentiation 1 [Source:RGD Symbol;Acc:3165]	yes|up	1
ENSRNOG00000000781	Rnf39	ring finger protein 39 [Source:RGD Symbol;Acc:628854]	yes|up	1
ENSRNOG00000042156	AABR07017874.1		yes|down	1
ENSRNOG00000018706	Il15ra	interleukin 15 receptor subunit alpha [Source:RGD Symbol;Acc:1305149]	yes|up	1
ENSRNOG00000016561	Pclaf	PCNA clamp associated factor [Source:RGD Symbol;Acc:1303041]	yes|down	1
ENSRNOG00000026378	LOC100911204	protein CASC5-like [Source:RGD Symbol;Acc:6494213]	yes|down	1
ENSRNOG00000007561	Glb1l2	galactosidase, beta 1-like 2 [Source:RGD Symbol;Acc:1564436]	yes|up	1
ENSRNOG00000033215	RT1-Db1	RT1 class II, locus Db1 [Source:RGD Symbol;Acc:1593282]	yes|down	1
ENSRNOG00000012964	Ccr6	C-C motif chemokine receptor 6 [Source:RGD Symbol;Acc:1308562]	yes|down	1
ENSRNOG00000042229	AC099444.2	GTPase, IMAP family member 1 [Source:NCBI gene;Acc:312312]	yes|down	1
ENSRNOG00000047175	Cryaa	crystallin, alpha A [Source:RGD Symbol;Acc:2413]	yes|down	1
ENSRNOG00000007606	Rnf43	ring finger protein 43 [Source:RGD Symbol;Acc:1305204]	yes|up	1
ENSRNOG00000013862	Dusp2	dual specificity phosphatase 2 [Source:RGD Symbol;Acc:1305804]	yes|down	1
ENSRNOG00000012628	Gpr18	G protein-coupled receptor 18 [Source:RGD Symbol;Acc:1304889]	yes|down	1
ENSRNOG00000022893	Rimbp2	RIMS binding protein 2 [Source:RGD Symbol;Acc:708533]	yes|up	1
ENSRNOG00000025278	Scai	suppressor of cancer cell invasion [Source:RGD Symbol;Acc:1594720]	yes|down	1
ENSRNOG00000028250	Lax1	lymphocyte transmembrane adaptor 1 [Source:RGD Symbol;Acc:1563522]	yes|down	1
ENSRNOG00000008310	Mpo	myeloperoxidase [Source:RGD Symbol;Acc:1592081]	yes|up	1
ENSRNOG00000001816	Rfc4	replication factor C subunit 4 [Source:RGD Symbol;Acc:1310142]	yes|down	1
ENSRNOG00000001817	Tm7sf3	transmembrane 7 superfamily member 3 [Source:RGD Symbol;Acc:1306752]	yes|up	1
ENSRNOG00000009588	Snph	syntaphilin [Source:RGD Symbol;Acc:1305867]	yes|up	1
ENSRNOG00000015055	Scg2	secretogranin II [Source:RGD Symbol;Acc:3626]	yes|up	1
ENSRNOG00000020811	Il6r	interleukin 6 receptor [Source:RGD Symbol;Acc:2902]	yes|down	1
ENSRNOG00000053884	Hoxa11	homeobox A11 [Source:RGD Symbol;Acc:1564605]	yes|up	1
ENSRNOG00000046479	Chaf1a	chromatin assembly factor 1 subunit A [Source:RGD Symbol;Acc:1590865]	yes|down	1
ENSRNOG00000032639	Foxo6	forkhead box O6 [Source:RGD Symbol;Acc:1595858]	yes|up	1
ENSRNOG00000032737	F7	coagulation factor VII [Source:RGD Symbol;Acc:628678]	yes|down	1
ENSRNOG00000032813	Mdc1	mediator of DNA damage checkpoint 1 [Source:RGD Symbol;Acc:1559468]	yes|down	1
ENSRNOG00000008941	Ets1	ETS proto-oncogene 1, transcription factor [Source:RGD Symbol;Acc:2583]	yes|down	1
ENSRNOG00000013668	Capg	capping actin protein, gelsolin like [Source:RGD Symbol;Acc:1311724]	yes|down	1
ENSRNOG00000021272	Mcm8	minichromosome maintenance 8 homologous recombination repair factor [Source:RGD Symbol;Acc:1305218]	yes|down	1
ENSRNOG00000011821	S100a4	S100 calcium-binding protein A4 [Source:RGD Symbol;Acc:3245]	yes|down	1
ENSRNOG00000025300	Fer1l6	fer-1-like family member 6 [Source:RGD Symbol;Acc:1564703]	yes|up	1
ENSRNOG00000008862	Abcg4	ATP binding cassette subfamily G member 4 [Source:RGD Symbol;Acc:1305840]	yes|up	1
ENSRNOG00000011826	Lzts1	leucine zipper tumor suppressor 1 [Source:RGD Symbol;Acc:708565]	yes|down	1
ENSRNOG00000017980	Itgal	integrin subunit alpha L [Source:RGD Symbol;Acc:631424]	yes|down	1
ENSRNOG00000013147	Cacna1d	calcium voltage-gated channel subunit alpha1 D [Source:RGD Symbol;Acc:70973]	yes|up	1
ENSRNOG00000046258	B3gnt5	UDP-GlcNAc:betaGal beta-1,3-N-acetylglucosaminyltransferase 5 [Source:RGD Symbol;Acc:70955]	yes|down	1
ENSRNOG00000047307	Cntfr	ciliary neurotrophic factor receptor [Source:RGD Symbol;Acc:1303100]	yes|up	1
ENSRNOG00000047304	Btnl5	butyrophilin-like 5 [Source:RGD Symbol;Acc:1598537]	yes|up	1
ENSRNOG00000024620	Mamdc2	MAM domain containing 2 [Source:MGI Symbol;Acc:MGI:1918988]	yes|up	1
ENSRNOG00000032708	RT1-Bb	RT1 class II, locus Bb [Source:RGD Symbol;Acc:3469]	yes|down	1
ENSRNOG00000025094	Gpr183	G protein-coupled receptor 183 [Source:RGD Symbol;Acc:1598095]	yes|down	1
ENSRNOG00000012393	S100a13	S100 calcium binding protein A13 [Source:RGD Symbol;Acc:1304919]	yes|down	1
ENSRNOG00000047376	AABR07049960.1		yes|up	1
ENSRNOG00000012172	Spi1	Spi-1 proto-oncogene [Source:RGD Symbol;Acc:1359607]	yes|down	1
ENSRNOG00000000479	Kifc1	kinesin family member C1 [Source:RGD Symbol;Acc:1359118]	yes|down	1
ENSRNOG00000039593	Ecscr	endothelial cell surface expressed chemotaxis and apoptosis regulator [Source:RGD Symbol;Acc:1594804]	yes|down	1
ENSRNOG00000047379	Zfp82	zinc finger protein 82 [Source:RGD Symbol;Acc:6499485]	yes|up	1
ENSRNOG00000026976	AABR07056369.1		yes|down	1
ENSRNOG00000006952	Prex1	phosphatidylinositol-3,4,5-trisphosphate-dependent Rac exchange factor 1 [Source:RGD Symbol;Acc:1306534]	yes|down	1
ENSRNOG00000038376	AABR07060795.1		yes|down	1
ENSRNOG00000010079	Car3	carbonic anhydrase 3 [Source:RGD Symbol;Acc:2241]	yes|up	1
ENSRNOG00000007412	Dok1	docking protein 1 [Source:RGD Symbol;Acc:1309499]	yes|down	1
ENSRNOG00000006418	Samhd1	SAM and HD domain containing deoxynucleoside triphosphate triphosphohydrolase 1 [Source:RGD Symbol;Acc:1308369]	yes|down	1
ENSRNOG00000012175	Nfatc2	nuclear factor of activated T-cells 2 [Source:RGD Symbol;Acc:1307690]	yes|down	1
ENSRNOG00000006410	Akap5	A-kinase anchoring protein 5 [Source:RGD Symbol;Acc:620829]	yes|down	1
ENSRNOG00000026056	Ccnb1ip1	cyclin B1 interacting protein 1 [Source:RGD Symbol;Acc:1561930]	yes|down	1
ENSRNOG00000020300	Lsp1	lymphocyte-specific protein 1 [Source:RGD Symbol;Acc:1306133]	yes|down	1
ENSRNOG00000013564	Dok3	docking protein 3 [Source:RGD Symbol;Acc:1311840]	yes|down	1
ENSRNOG00000014496	Coro6	coronin 6 [Source:RGD Symbol;Acc:708560]	yes|up	1
ENSRNOG00000013916	Nefm	neurofilament medium [Source:RGD Symbol;Acc:3160]	yes|up	1
ENSRNOG00000053430	Slco4a1	solute carrier organic anion transporter family, member 4a1 [Source:RGD Symbol;Acc:620228]	yes|down	1
ENSRNOG00000013914	Gpr132	G protein-coupled receptor 132 [Source:RGD Symbol;Acc:1310817]	yes|down	1
ENSRNOG00000054560	Sh2d3c	SH2 domain containing 3C [Source:RGD Symbol;Acc:1307287]	yes|down	1
ENSRNOG00000053004	LOC102551080	uncharacterized LOC102551080 [Source:RGD Symbol;Acc:7511815]	yes|up	1
ENSRNOG00000056037	AABR07034636.1		yes|down	1
ENSRNOG00000015945	Cd3g	CD3g molecule [Source:RGD Symbol;Acc:1307718]	yes|down	1
ENSRNOG00000051986	Plcg2	phospholipase C, gamma 2 [Source:RGD Symbol;Acc:3348]	yes|down	1
ENSRNOG00000006096	Slc26a7	solute carrier family 26 member 7 [Source:RGD Symbol;Acc:1310846]	yes|up	1
ENSRNOG00000000606	Pcdh15	protocadherin related 15 [Source:RGD Symbol;Acc:1590969]	yes|down	1
ENSRNOG00000003098	Prom1	prominin 1 [Source:RGD Symbol;Acc:69367]	yes|up	1
ENSRNOG00000001608	Nxpe3	neurexophilin and PC-esterase domain family, member 3 [Source:RGD Symbol;Acc:1584648]	yes|down	1
ENSRNOG00000008839	Pparg	peroxisome proliferator-activated receptor gamma [Source:RGD Symbol;Acc:3371]	yes|up	1
ENSRNOG00000028137	Mki67	marker of proliferation Ki-67 [Source:RGD Symbol;Acc:1305476]	yes|down	1
ENSRNOG00000021384	Ankrd44	ankyrin repeat domain 44 [Source:RGD Symbol;Acc:1561893]	yes|down	1
ENSRNOG00000002304	Tnfrsf13b	TNF receptor superfamily member 13B [Source:RGD Symbol;Acc:1595998]	yes|down	1
ENSRNOG00000012404	Thrsp	thyroid hormone responsive [Source:RGD Symbol;Acc:3859]	yes|up	1
ENSRNOG00000006735	Cdkn2b	cyclin-dependent kinase inhibitor 2B [Source:RGD Symbol;Acc:2324]	yes|up	1
ENSRNOG00000006731	Spc25	SPC25, NDC80 kinetochore complex component [Source:RGD Symbol;Acc:1307811]	yes|down	1
ENSRNOG00000029662	Wdfy4	WDFY family member 4 [Source:RGD Symbol;Acc:1564142]	yes|down	1
ENSRNOG00000001425	Sh2b2	SH2B adaptor protein 2 [Source:RGD Symbol;Acc:69284]	yes|down	1
ENSRNOG00000000036	Klhdc8a	kelch domain containing 8A [Source:RGD Symbol;Acc:1305132]	yes|up	1
ENSRNOG00000021128	Kcnj11	potassium voltage-gated channel subfamily J member 11 [Source:RGD Symbol;Acc:69247]	yes|up	1
ENSRNOG00000020702	Cyb561a3	cytochrome b561 family, member A3 [Source:RGD Symbol;Acc:1304670]	yes|down	1
ENSRNOG00000021795	Fam227a	family with sequence similarity 227, member A [Source:RGD Symbol;Acc:1305939]	yes|up	1
ENSRNOG00000004473	Ppargc1a	PPARG coactivator 1 alpha [Source:RGD Symbol;Acc:620925]	yes|up	1
ENSRNOG00000027430	Ikzf2	IKAROS family zinc finger 2 [Source:RGD Symbol;Acc:1308686]	yes|down	1
ENSRNOG00000050118	AABR07065750.2		yes|down	1
ENSRNOG00000005825	Lyz2	lysozyme 2 [Source:RGD Symbol;Acc:3026]	yes|down	1
ENSRNOG00000021345	Timd2	T-cell immunoglobulin and mucin domain containing 2 [Source:RGD Symbol;Acc:1359571]	yes|down	1
ENSRNOG00000031824	Slc44a2	solute carrier family 44 member 2 [Source:RGD Symbol;Acc:1309680]	yes|down	1
ENSRNOG00000005126	Pqlc3	PQ loop repeat containing 3 [Source:RGD Symbol;Acc:1306818]	yes|down	1
ENSRNOG00000020837	Cd300lg	Cd300 molecule-like family member G [Source:RGD Symbol;Acc:1584376]	yes|up	1
ENSRNOG00000004048	Lrrk2	leucine-rich repeat kinase 2 [Source:RGD Symbol;Acc:1561168]	yes|down	1
ENSRNOG00000051831	RF00002		yes|up	1
ENSRNOG00000028043	Cxcl3	chemokine (C-X-C motif) ligand 3 [Source:RGD Symbol;Acc:621812]	yes|down	1
ENSRNOG00000012008	S100a3	S100 calcium binding protein A3 [Source:RGD Symbol;Acc:620260]	yes|down	1
ENSRNOG00000058446	Il7r	interleukin 7 receptor [Source:RGD Symbol;Acc:1309776]	yes|down	1
ENSRNOG00000021555	Mis18a	MIS18 kinetochore protein A [Source:RGD Symbol;Acc:1310778]	yes|down	1
ENSRNOG00000020441	Wnk4	WNK lysine deficient protein kinase 4 [Source:RGD Symbol;Acc:631401]	yes|up	1
ENSRNOG00000027891	Dhrs11	dehydrogenase/reductase 11 [Source:RGD Symbol;Acc:1307935]	yes|up	1
ENSRNOG00000001258	Snx8	sorting nexin 8 [Source:RGD Symbol;Acc:1305791]	yes|down	1
ENSRNOG00000001259	Cux2	cut-like homeobox 2 [Source:RGD Symbol;Acc:1305967]	yes|up	1
ENSRNOG00000005637	Usp44	ubiquitin specific peptidase 44 [Source:RGD Symbol;Acc:1308216]	yes|down	1
ENSRNOG00000016368	Ppp1r14c	protein phosphatase 1, regulatory (inhibitor) subunit 14c [Source:RGD Symbol;Acc:620538]	yes|up	1
ENSRNOG00000028541	Btnl2	butyrophilin-like 2 [Source:RGD Symbol;Acc:620731]	yes|up	1
ENSRNOG00000054218	Il18rap	interleukin 18 receptor accessory protein [Source:RGD Symbol;Acc:727867]	yes|down	1
ENSRNOG00000053891	AABR07018078.1	PHD finger protein 11 [Source:NCBI gene;Acc:361051]	yes|down	1
ENSRNOG00000058787	AABR07017649.2		yes|down	1
ENSRNOG00000019328	Phgdh	phosphoglycerate dehydrogenase [Source:RGD Symbol;Acc:61987]	yes|down	1
ENSRNOG00000030177	AABR07060979.1		yes|down	1
ENSRNOG00000056760	AABR07065656.8		yes|up	1
ENSRNOG00000004899	Kcns3	potassium voltage-gated channel, modifier subfamily S, member 3 [Source:RGD Symbol;Acc:621527]	yes|up	1
ENSRNOG00000054217	Runx3	runt-related transcription factor 3 [Source:RGD Symbol;Acc:620082]	yes|down	1
ENSRNOG00000009919	Acod1	aconitate decarboxylase 1 [Source:RGD Symbol;Acc:1563454]	yes|down	1
ENSRNOG00000050564	AABR07060585.2		yes|up	1
ENSRNOG00000000816	Ppp1r18	protein phosphatase 1, regulatory subunit 18 [Source:RGD Symbol;Acc:1309543]	yes|down	1
ENSRNOG00000002128	Ppat	phosphoribosyl pyrophosphate amidotransferase [Source:RGD Symbol;Acc:620237]	yes|down	1
ENSRNOG00000009912	Fgr	FGR proto-oncogene, Src family tyrosine kinase [Source:RGD Symbol;Acc:621319]	yes|down	1
ENSRNOG00000004805	Stac2	SH3 and cysteine rich domain 2 [Source:RGD Symbol;Acc:1305548]	yes|down	1
ENSRNOG00000009260	Cnr2	cannabinoid receptor 2 [Source:RGD Symbol;Acc:619713]	yes|down	1
ENSRNOG00000021724	Ptprcap	protein tyrosine phosphatase, receptor type, C-associated protein [Source:RGD Symbol;Acc:1559601]	yes|down	1
ENSRNOG00000013213	Epha4	Eph receptor A4 [Source:RGD Symbol;Acc:1560587]	yes|up	1
ENSRNOG00000009691	Lrrn2	leucine rich repeat neuronal 2 [Source:RGD Symbol;Acc:1305482]	yes|up	1
ENSRNOG00000054286	Rrm2	ribonucleotide reductase regulatory subunit M2 [Source:RGD Symbol;Acc:1598310]	yes|down	1
ENSRNOG00000005250	Abcg5	ATP binding cassette subfamily G member 5 [Source:RGD Symbol;Acc:620298]	yes|down	1
ENSRNOG00000014524	S1pr3	sphingosine-1-phosphate receptor 3 [Source:RGD Symbol;Acc:1583843]	yes|down	1
ENSRNOG00000027096	Ctsw	cathepsin W [Source:RGD Symbol;Acc:1309354]	yes|down	1
ENSRNOG00000003972	Tshr	thyroid stimulating hormone receptor [Source:RGD Symbol;Acc:3911]	yes|up	1
ENSRNOG00000003977	Dusp1	dual specificity phosphatase 1 [Source:RGD Symbol;Acc:620897]	yes|up	1
ENSRNOG00000010665	Ccr7	C-C motif chemokine receptor 7 [Source:RGD Symbol;Acc:735151]	yes|down	1
ENSRNOG00000010666	Ccn5	cellular communication network factor 5 [Source:RGD Symbol;Acc:621867]	yes|down	1
ENSRNOG00000004150	Slc9a7	solute carrier family 9 member A7 [Source:RGD Symbol;Acc:1561385]	yes|down	1
ENSRNOG00000031202	Trim30c	tripartite motif-containing 30C [Source:RGD Symbol;Acc:1566132]	yes|down	1
ENSRNOG00000049740	AABR07034273.1	N-alpha-acetyltransferase 50-like [Source:NCBI gene;Acc:102553099]	yes|up	1
ENSRNOG00000004158	Hdac9	histone deacetylase 9 [Source:RGD Symbol;Acc:1310748]	yes|down	1
ENSRNOG00000038740	Gimap7	GTPase, IMAP family member 7 [Source:RGD Symbol;Acc:1565750]	yes|down	1
ENSRNOG00000042499	LOC100364435	thymosin, beta 10-like [Source:RGD Symbol;Acc:2321025]	yes|down	1
ENSRNOG00000055451	Gcnt4	glucosaminyl (N-acetyl) transferase 4, core 2 (beta-1,6-N-acetylglucosaminyltransferase) [Source:MGI Symbol;Acc:MGI:2684919]	yes|up	1
ENSRNOG00000016977	Calb2	calbindin 2 [Source:RGD Symbol;Acc:620981]	yes|up	1
ENSRNOG00000053945	Daam2	dishevelled associated activator of morphogenesis 2 [Source:RGD Symbol;Acc:1306128]	yes|up	1
ENSRNOG00000058552	AABR07051733.3		yes|down	1
ENSRNOG00000016971	Zfp612	zinc finger protein 612 [Source:RGD Symbol;Acc:1307197]	yes|up	1
ENSRNOG00000053948	LOC102549506	kelch-like protein 3-like [Source:RGD Symbol;Acc:7622474]	yes|down	1
ENSRNOG00000020444	Hcn3	hyperpolarization-activated cyclic nucleotide-gated potassium channel 3 [Source:RGD Symbol;Acc:620691]	yes|up	1
ENSRNOG00000015616	Rgs14	regulator of G-protein signaling 14 [Source:RGD Symbol;Acc:620003]	yes|down	1
ENSRNOG00000032951	Jsrp1	junctional sarcoplasmic reticulum protein 1 [Source:RGD Symbol;Acc:1596084]	yes|down	1
ENSRNOG00000016978	LOC308990	hypothetical protein LOC308990 [Source:RGD Symbol;Acc:1564503]	yes|down	1
ENSRNOG00000002525	Ptgs2	prostaglandin-endoperoxide synthase 2 [Source:RGD Symbol;Acc:620349]	yes|up	1
ENSRNOG00000009031	Gucy2c	guanylate cyclase 2C [Source:RGD Symbol;Acc:2771]	yes|up	1
ENSRNOG00000025302	Cdca2	cell division cycle associated 2 [Source:RGD Symbol;Acc:1311003]	yes|down	1
ENSRNOG00000015438	Ces1c	carboxylesterase 1C [Source:RGD Symbol;Acc:2571]	yes|up	1
ENSRNOG00000001527	Cd80	Cd80 molecule [Source:RGD Symbol;Acc:2314]	yes|down	1
ENSRNOG00000004578	Cthrc1	collagen triple helix repeat containing 1 [Source:RGD Symbol;Acc:628801]	yes|down	1
ENSRNOG00000004470	Il24	interleukin 24 [Source:RGD Symbol;Acc:621484]	yes|down	1
ENSRNOG00000015538	Abcd2	ATP binding cassette subfamily D member 2 [Source:RGD Symbol;Acc:69244]	yes|up	1
ENSRNOG00000010320	Efnb3	ephrin B3 [Source:RGD Symbol;Acc:2541]	yes|down	1
ENSRNOG00000029055	Ttk	Ttk protein kinase [Source:RGD Symbol;Acc:1305558]	yes|down	1
ENSRNOG00000002950	Lyl1	LYL1, basic helix-loop-helix family member [Source:RGD Symbol;Acc:1359244]	yes|down	1
ENSRNOG00000003890	Nap1l1	nucleosome assembly protein 1-like 1 [Source:RGD Symbol;Acc:71094]	yes|down	1
ENSRNOG00000002953	P2ry4	pyrimidinergic receptor P2Y4 [Source:RGD Symbol;Acc:61798]	yes|up	1
ENSRNOG00000018741	Zfp318	zinc finger protein 318 [Source:RGD Symbol;Acc:1583221]	yes|down	1
ENSRNOG00000058916	Ccdc65	coiled-coil domain containing 65 [Source:RGD Symbol;Acc:1595842]	yes|up	1
ENSRNOG00000039183	Cip2a	cell proliferation regulating inhibitor of protein phosphatase 2A [Source:RGD Symbol;Acc:1310335]	yes|down	1
ENSRNOG00000025925	Txk	TXK tyrosine kinase [Source:RGD Symbol;Acc:1306481]	yes|down	1
ENSRNOG00000051499	Tcf3	transcription factor 3 [Source:RGD Symbol;Acc:620914]	yes|down	1
ENSRNOG00000026672	MGC94199	similar to RIKEN cDNA 2610301B20; EST AI428449 [Source:RGD Symbol;Acc:1549749]	yes|down	1
ENSRNOG00000005410	Cdca7l	cell division cycle associated 7 like [Source:RGD Symbol;Acc:1564080]	yes|down	1
ENSRNOG00000017690	Ccsap	centriole, cilia and spindle-associated protein [Source:RGD Symbol;Acc:1563235]	yes|down	1
ENSRNOG00000008588	Batf	basic leucine zipper ATF-like transcription factor [Source:RGD Symbol;Acc:1304923]	yes|down	1
ENSRNOG00000019894	Izumo1r	IZUMO1 receptor, JUNO [Source:RGD Symbol;Acc:1585174]	yes|down	1
ENSRNOG00000003802	Pttg1	pituitary tumor-transforming 1 [Source:RGD Symbol;Acc:68359]	yes|down	1
ENSRNOG00000003553	Efemp1	EGF containing fibulin extracellular matrix protein 1 [Source:RGD Symbol;Acc:1308528]	yes|up	1
ENSRNOG00000055300	Ncapd2	non-SMC condensin I complex, subunit D2 [Source:RGD Symbol;Acc:1562596]	yes|down	1
ENSRNOG00000013683	S1pr1	sphingosine-1-phosphate receptor 1 [Source:RGD Symbol;Acc:61958]	yes|down	1
ENSRNOG00000059121	AABR07065714.1		yes|down	1
ENSRNOG00000033134	Mef2c	myocyte enhancer factor 2C [Source:RGD Symbol;Acc:1563119]	yes|down	1
ENSRNOG00000045947	Acsbg2	acyl-CoA synthetase bubblegum family member 2 [Source:RGD Symbol;Acc:1588580]	yes|up	1
ENSRNOG00000016306	Adgrv1	adhesion G protein-coupled receptor V1 [Source:RGD Symbol;Acc:1562101]	yes|down	1
ENSRNOG00000018445	Agt	angiotensinogen [Source:RGD Symbol;Acc:2069]	yes|up	1
ENSRNOG00000016628	Scgn	secretagogin, EF-hand calcium binding protein [Source:RGD Symbol;Acc:1303281]	yes|up	1
ENSRNOG00000014135	Rab11fip4	RAB11 family interacting protein 4 [Source:RGD Symbol;Acc:1305063]	yes|down	1
ENSRNOG00000055398	AABR07043039.1		yes|up	1
ENSRNOG00000001376	Mettl7a	methyltransferase like 7A [Source:RGD Symbol;Acc:1308407]	yes|up	1
ENSRNOG00000060521	AABR07011084.2		yes|down	1
ENSRNOG00000010805	Fabp4	fatty acid binding protein 4 [Source:RGD Symbol;Acc:69309]	yes|up	1
ENSRNOG00000049991	Mcpt8l3	mast cell protease 8-like 3 [Source:RGD Symbol;Acc:1302975]	yes|up	1
ENSRNOG00000060528	Cacna1g	calcium voltage-gated channel subunit alpha1 G [Source:RGD Symbol;Acc:68942]	yes|up	1
ENSRNOG00000015445	Mal	mal, T-cell differentiation protein [Source:RGD Symbol;Acc:3037]	yes|down	1
ENSRNOG00000002730	Rgs5	regulator of G-protein signaling 5 [Source:RGD Symbol;Acc:3568]	yes|up	1
ENSRNOG00000001379	Cyp3a62	cytochrome P450, family 3, subfamily a, polypeptide 62 [Source:RGD Symbol;Acc:1595919]	yes|up	1
ENSRNOG00000037467	Ffar3	free fatty acid receptor 3 [Source:RGD Symbol;Acc:1311035]	yes|up	1
ENSRNOG00000018669	Jak3	Janus kinase 3 [Source:RGD Symbol;Acc:2940]	yes|down	1
ENSRNOG00000011054	Laptm5	lysosomal protein transmembrane 5 [Source:RGD Symbol;Acc:621838]	yes|down	1
ENSRNOG00000003800	Rgs9	regulator of G-protein signaling 9 [Source:RGD Symbol;Acc:3572]	yes|up	1
ENSRNOG00000042374	Tgif2	TGFB-induced factor homeobox 2 [Source:RGD Symbol;Acc:1560115]	yes|down	1
ENSRNOG00000011754	Myom2	myomesin 2 [Source:RGD Symbol;Acc:631437]	yes|up	1
ENSRNOG00000050874	LOC102552549	migration and invasion enhancer 1-like [Source:RGD Symbol;Acc:7553401]	yes|up	1
ENSRNOG00000033722	Rnf207	ring finger protein 207 [Source:RGD Symbol;Acc:1586262]	yes|up	1
ENSRNOG00000019718	Galnt15	polypeptide N-acetylgalactosaminyltransferase 15 [Source:NCBI gene;Acc:100360475]	yes|up	1
ENSRNOG00000019719	Kcna5	potassium voltage-gated channel subfamily A member 5 [Source:RGD Symbol;Acc:2953]	yes|up	1
ENSRNOG00000052789	AABR07044562.1		yes|down	1
ENSRNOG00000033680	Cyp2b1	cytochrome P450, family 2, subfamily b, polypeptide 1 [Source:RGD Symbol;Acc:2466]	yes|up	1
ENSRNOG00000008146	Tox2	TOX high mobility group box family member 2 [Source:RGD Symbol;Acc:735184]	yes|down	1
ENSRNOG00000018784	Jph3	junctophilin 3 [Source:RGD Symbol;Acc:1308416]	yes|up	1
ENSRNOG00000033912	Fcho1	FCH domain only 1 [Source:RGD Symbol;Acc:1307683]	yes|down	1
ENSRNOG00000048230	AABR07056118.1	Rattus norvegicus [Source:RefSeq mRNA;Acc:NM_001013952]	yes|down	1
ENSRNOG00000013554	Treml2	triggering receptor expressed on myeloid cells-like 2 [Source:RGD Symbol;Acc:1587039]	yes|down	1
ENSRNOG00000014227	Mrgprx3	MAS related GPR family member X3 [Source:RGD Symbol;Acc:632282]	yes|down	1
ENSRNOG00000014347	Slc4a2	solute carrier family 4 member 2 [Source:RGD Symbol;Acc:3711]	yes|up	1
ENSRNOG00000019387	Ifi30	IFI30, lysosomal thiol reductase [Source:RGD Symbol;Acc:1310758]	yes|down	1
ENSRNOG00000038881	Hcls1	hematopoietic cell specific Lyn substrate 1 [Source:RGD Symbol;Acc:1304754]	yes|down	1
ENSRNOG00000017188	Cyp27a1	cytochrome P450, family 27, subfamily a, polypeptide 1 [Source:RGD Symbol;Acc:727915]	yes|up	1
ENSRNOG00000008012	Abcb4	ATP binding cassette subfamily B member 4 [Source:RGD Symbol;Acc:620248]	yes|up	1
ENSRNOG00000047046	Plin4	perilipin 4 [Source:RGD Symbol;Acc:1590867]	yes|up	1
ENSRNOG00000000383	Mypn	myopalladin [Source:RGD Symbol;Acc:1308510]	yes|up	1
ENSRNOG00000008015	Fos	Fos proto-oncogene, AP-1 transcription factor subunit [Source:RGD Symbol;Acc:2626]	yes|up	1
ENSRNOG00000022784	Fzd10	frizzled class receptor 10 [Source:RGD Symbol;Acc:1583825]	yes|up	1
ENSRNOG00000008394	Prg2	proteoglycan 2 [Source:RGD Symbol;Acc:69336]	yes|down	1
ENSRNOG00000037199	Spink8	serine peptidase inhibitor, Kazal type 8 [Source:RGD Symbol;Acc:1307150]	yes|up	1
ENSRNOG00000003705	Bmx	BMX non-receptor tyrosine kinase [Source:RGD Symbol;Acc:1565643]	yes|up	1
ENSRNOG00000003703	Mcm6	minichromosome maintenance complex component 6 [Source:RGD Symbol;Acc:61967]	yes|down	1
ENSRNOG00000003064	Bst1	bone marrow stromal cell antigen 1 [Source:RGD Symbol;Acc:620344]	yes|down	1
ENSRNOG00000033262	Reep6	receptor accessory protein 6 [Source:RGD Symbol;Acc:1309508]	yes|down	1
ENSRNOG00000026203	Pax8	paired box 8 [Source:RGD Symbol;Acc:620434]	yes|up	1
ENSRNOG00000016575	Tnfrsf1b	TNF receptor superfamily member 1B [Source:RGD Symbol;Acc:621238]	yes|down	1
ENSRNOG00000003709	Kmo	kynurenine 3-monooxygenase [Source:RGD Symbol;Acc:620610]	yes|down	1
ENSRNOG00000022760	Rubcnl	rubicon like autophagy regulator [Source:RGD Symbol;Acc:1304929]	yes|down	1
ENSRNOG00000022764	Evi2a	ecotropic viral integration site 2A [Source:RGD Symbol;Acc:1593824]	yes|down	1
ENSRNOG00000060179	Gpc3	glypican 3 [Source:RGD Symbol;Acc:2725]	yes|up	1
ENSRNOG00000012972	Alox5	arachidonate 5-lipoxygenase [Source:RGD Symbol;Acc:2096]	yes|up	1
ENSRNOG00000028768	Gbp4	guanylate binding protein 4 [Source:RGD Symbol;Acc:1310579]	yes|down	1
ENSRNOG00000045752	Rrm1	ribonucleotide reductase catalytic subunit M1 [Source:RGD Symbol;Acc:1592569]	yes|down	1
ENSRNOG00000033330	Skida1	SKI/DACH domain containing 1 [Source:MGI Symbol;Acc:MGI:1919918]	yes|up	1
ENSRNOG00000012659	Vamp5	vesicle-associated membrane protein 5 [Source:RGD Symbol;Acc:620419]	yes|down	1
ENSRNOG00000016308	Il10ra	interleukin 10 receptor subunit alpha [Source:RGD Symbol;Acc:620138]	yes|down	1
ENSRNOG00000025460	Tmem71	transmembrane protein 71 [Source:RGD Symbol;Acc:1593414]	yes|down	1
ENSRNOG00000014343	Anln	anillin, actin binding protein [Source:RGD Symbol;Acc:1561367]	yes|down	1
ENSRNOG00000001807	Sspn	sarcospan [Source:RGD Symbol;Acc:1559723]	yes|up	1
ENSRNOG00000007178	Cd8a	CD8a molecule [Source:RGD Symbol;Acc:2316]	yes|down	1
ENSRNOG00000019174	Chtf18	chromosome transmission fidelity factor 18 [Source:RGD Symbol;Acc:1310473]	yes|down	1
ENSRNOG00000002607	Sox9	SRY box 9 [Source:RGD Symbol;Acc:620474]	yes|up	1
ENSRNOG00000056981	AABR07034956.1		yes|down	1
ENSRNOG00000021269	Chgb	chromogranin B [Source:RGD Symbol;Acc:2339]	yes|up	1
ENSRNOG00000028238	Sh3bgr	SH3 domain binding glutamate-rich protein [Source:RGD Symbol;Acc:1563599]	yes|up	1
ENSRNOG00000014979	Themis	thymocyte selection associated [Source:RGD Symbol;Acc:1560849]	yes|down	1
ENSRNOG00000002540	Rhoh	ras homolog family member H [Source:RGD Symbol;Acc:1307623]	yes|down	1
ENSRNOG00000053763	AABR07017748.2		yes|down	1
ENSRNOG00000018839	Ntrk2	neurotrophic receptor tyrosine kinase 2 [Source:RGD Symbol;Acc:3213]	yes|down	1
ENSRNOG00000021261	Rassf2	Ras association domain family member 2 [Source:RGD Symbol;Acc:1305551]	yes|down	1
ENSRNOG00000021260	Prnd	prion like protein doppel [Source:RGD Symbol;Acc:1306618]	yes|down	1
ENSRNOG00000002548	Tnn	tenascin N [Source:RGD Symbol;Acc:1306002]	yes|down	1
ENSRNOG00000043513	Cyp4x1	cytochrome P450, family 4, subfamily x, polypeptide 1 [Source:RGD Symbol;Acc:628719]	yes|up	1
ENSRNOG00000013774	Lmnb1	lamin B1 [Source:RGD Symbol;Acc:620522]	yes|down	1
ENSRNOG00000058827	Six2	SIX homeobox 2 [Source:RGD Symbol;Acc:1310792]	yes|up	1
ENSRNOG00000022110	Gcsam	germinal center-associated, signaling and motility [Source:RGD Symbol;Acc:1591321]	yes|down	1
ENSRNOG00000012486	Prim2	DNA primase subunit 2 [Source:RGD Symbol;Acc:631433]	yes|down	1
ENSRNOG00000007493	Xrcc2	X-ray repair cross complementing 2 [Source:RGD Symbol;Acc:1564823]	yes|down	1
ENSRNOG00000013679	Sema4d	semaphorin 4D [Source:RGD Symbol;Acc:1310554]	yes|down	1
ENSRNOG00000021463	Ppara	peroxisome proliferator activated receptor alpha [Source:RGD Symbol;Acc:3369]	yes|up	1
ENSRNOG00000006557	Cyfip2	cytoplasmic FMR1 interacting protein 2 [Source:RGD Symbol;Acc:1305048]	yes|down	1
ENSRNOG00000008570	Cadps	calcium dependent secretion activator [Source:RGD Symbol;Acc:708573]	yes|up	1
ENSRNOG00000006314	Zbp1	Z-DNA binding protein 1 [Source:RGD Symbol;Acc:619956]	yes|down	1
ENSRNOG00000022163	LOC102555023	uncharacterized LOC102555023 [Source:RGD Symbol;Acc:7527767]	yes|down	1
ENSRNOG00000000441	Gpsm3	G-protein signaling modulator 3 [Source:RGD Symbol;Acc:1303014]	yes|down	1
ENSRNOG00000000443	LOC103689965	complement C4-like [Source:RGD Symbol;Acc:9245878]	yes|down	1
ENSRNOG00000046313	Basp1	brain abundant, membrane attached signal protein 1 [Source:RGD Symbol;Acc:621491]	yes|down	1
ENSRNOG00000022012	Tnfrsf18	TNF receptor superfamily member 18 [Source:RGD Symbol;Acc:1565872]	yes|down	1
ENSRNOG00000059876	Fsd1l	fibronectin type III and SPRY domain containing 1-like [Source:RGD Symbol;Acc:1564809]	yes|up	1
ENSRNOG00000036834	Gpr84	G protein-coupled receptor 84 [Source:RGD Symbol;Acc:1585277]	yes|down	1
ENSRNOG00000056209	Exo1	exonuclease 1 [Source:RGD Symbol;Acc:1309465]	yes|down	1
ENSRNOG00000045683	LOC102553715	microfibril-associated glycoprotein 4-like [Source:RGD Symbol;Acc:7719175]	yes|down	1
ENSRNOG00000047848	Cbr1	carbonyl reductase 1 [Source:RGD Symbol;Acc:2286]	yes|up	1
ENSRNOG00000021000	Naaladl1	N-acetylated alpha-linked acidic dipeptidase-like 1 [Source:RGD Symbol;Acc:620987]	yes|up	1
ENSRNOG00000055518	AABR07024303.1		yes|down	1
ENSRNOG00000003208	Ercc6l	ERCC excision repair 6 like, spindle assembly checkpoint helicase [Source:RGD Symbol;Acc:1565734]	yes|down	1
ENSRNOG00000045797	Lep	leptin [Source:RGD Symbol;Acc:3000]	yes|up	1
ENSRNOG00000001333	Azgp1	alpha-2-glycoprotein 1, zinc-binding [Source:RGD Symbol;Acc:2187]	yes|up	1
ENSRNOG00000006030	Ptprz1	protein tyrosine phosphatase, receptor type Z1 [Source:RGD Symbol;Acc:3455]	yes|up	1
ENSRNOG00000056431	AABR07021492.1		yes|down	1
ENSRNOG00000056436	AABR07072028.1		yes|down	1
ENSRNOG00000046036	Itprip	inositol 1,4,5-trisphosphate receptor interacting protein [Source:RGD Symbol;Acc:6488464]	yes|down	1
ENSRNOG00000053406	Gramd1c	GRAM domain containing 1C [Source:RGD Symbol;Acc:1305433]	yes|up	1
ENSRNOG00000056338	AABR07058884.1		yes|down	1
ENSRNOG00000046635	Cdca5	cell division cycle associated 5 [Source:RGD Symbol;Acc:1560863]	yes|down	1
ENSRNOG00000056448	AABR07062033.1		yes|down	1
ENSRNOG00000021098	Rasgrp2	RAS guanyl releasing protein 2 [Source:RGD Symbol;Acc:1311630]	yes|down	1
ENSRNOG00000003244	Ltc4s	leukotriene C4 synthase [Source:RGD Symbol;Acc:620677]	yes|up	1
ENSRNOG00000002331	Aldh3a1	aldehyde dehydrogenase 3 family, member A1 [Source:RGD Symbol;Acc:2088]	yes|down	1
ENSRNOG00000021644	Slc15a3	solute carrier family 15 member 3 [Source:RGD Symbol;Acc:628663]	yes|down	1
ENSRNOG00000024457	Cyct	cytochrome c, testis [Source:RGD Symbol;Acc:2452]	yes|up	1
ENSRNOG00000015921	Esco2	establishment of sister chromatid cohesion N-acetyltransferase 2 [Source:RGD Symbol;Acc:1593313]	yes|down	1
ENSRNOG00000013294	Sh2d2a	SH2 domain containing 2A [Source:RGD Symbol;Acc:1303076]	yes|down	1
ENSRNOG00000057096	Gnai1	G protein subunit alpha i1 [Source:RGD Symbol;Acc:2713]	yes|up	1
ENSRNOG00000053301	LOC685767	similar to OX-2 membrane glycoprotein precursor (MRC OX-2 antigen) (CD200 antigen) [Source:RGD Symbol;Acc:1590201]	yes|up	1
ENSRNOG00000030814	Kb23	type II keratin 23 [Source:RGD Symbol;Acc:1303024]	yes|up	1
ENSRNOG00000020281	Kif22	kinesin family member 22 [Source:RGD Symbol;Acc:1311886]	yes|down	1
ENSRNOG00000005038	Ube2t	ubiquitin-conjugating enzyme E2T [Source:RGD Symbol;Acc:1310816]	yes|down	1
ENSRNOG00000003338	Pmp22	peripheral myelin protein 22 [Source:RGD Symbol;Acc:3359]	yes|up	1
ENSRNOG00000017136	Syt17	synaptotagmin 17 [Source:RGD Symbol;Acc:708576]	yes|up	1
ENSRNOG00000051383	Srsf12	serine and arginine rich splicing factor 12 [Source:RGD Symbol;Acc:1561162]	yes|down	1
ENSRNOG00000003330	Acsf2	acyl-CoA synthetase family member 2 [Source:RGD Symbol;Acc:1562656]	yes|up	1
ENSRNOG00000003336	Mybph	myosin binding protein H [Source:RGD Symbol;Acc:620287]	yes|down	1
ENSRNOG00000030246	Btla	B and T lymphocyte associated [Source:RGD Symbol;Acc:1303280]	yes|down	1
ENSRNOG00000051002	RT1-DMb	RT1 class II, locus DMb [Source:RGD Symbol;Acc:735096]	yes|down	1
ENSRNOG00000017020	Inpp5d	inositol polyphosphate-5-phosphatase D [Source:RGD Symbol;Acc:2914]	yes|down	1
ENSRNOG00000007927	Mettl7b	methyltransferase like 7B [Source:RGD Symbol;Acc:1305205]	yes|up	1
ENSRNOG00000013057	Prc1	protein regulator of cytokinesis 1 [Source:RGD Symbol;Acc:1311754]	yes|down	1
ENSRNOG00000028636	Xkr5	XK related 5 [Source:RGD Symbol;Acc:1359335]	yes|down	1
ENSRNOG00000029881	Clec4m	C-type lectin domain family 4 member M [Source:RGD Symbol;Acc:1561466]	yes|down	1
ENSRNOG00000007062	Rin3	Ras and Rab interactor 3 [Source:RGD Symbol;Acc:1305849]	yes|down	1
ENSRNOG00000053272	Chi3l1	chitinase 3 like 1 [Source:RGD Symbol;Acc:620874]	yes|down	1
ENSRNOG00000020845	Tyrobp	Tyro protein tyrosine kinase binding protein [Source:RGD Symbol;Acc:1303081]	yes|down	1
ENSRNOG00000015691	Inka2	inka box actin regulator 2 [Source:RGD Symbol;Acc:1306526]	yes|up	1
ENSRNOG00000005620	Lcp2	lymphocyte cytosolic protein 2 [Source:RGD Symbol;Acc:619743]	yes|down	1
ENSRNOG00000005780	Adamts13	ADAM metallopeptidase with thrombospondin type 1 motif, 13 [Source:RGD Symbol;Acc:1311594]	yes|down	1
ENSRNOG00000015275	Ska1	spindle and kinetochore associated complex subunit 1 [Source:RGD Symbol;Acc:1310784]	yes|down	1
ENSRNOG00000004860	Myh9	myosin, heavy chain 9 [Source:RGD Symbol;Acc:3140]	yes|down	1
ENSRNOG00000058796	AABR07035005.1		yes|up	1
ENSRNOG00000005968	Hoxa2	homeobox A2 [Source:RGD Symbol;Acc:11468112]	yes|up	1
ENSRNOG00000025764	AC128848.1		yes|up	1
ENSRNOG00000030101	Traip	TRAF-interacting protein [Source:RGD Symbol;Acc:1309761]	yes|down	1
ENSRNOG00000008157	Syn2	synapsin II [Source:RGD Symbol;Acc:3798]	yes|up	1
ENSRNOG00000057443	LOC497963	similar to Nitric oxide synthase, inducible (NOS type II) (Inducible NO synthase) (Inducible NOS) (iNOS) [Source:RGD Symbol;Acc:1598227]	yes|down	1
ENSRNOG00000057701	Myom1	myomesin 1 [Source:RGD Symbol;Acc:631436]	yes|up	1
ENSRNOG00000018358	Nt5dc2	5'-nucleotidase domain containing 2 [Source:RGD Symbol;Acc:1305524]	yes|down	1
ENSRNOG00000043866	AY172581.24		yes|up	1
ENSRNOG00000000869	Arhgef6	Rac/Cdc42 guanine nucleotide exchange factor 6 [Source:RGD Symbol;Acc:1359674]	yes|down	1
ENSRNOG00000015994	Cd3d	CD3d molecule [Source:RGD Symbol;Acc:2304]	yes|down	1
ENSRNOG00000013220	Arhgap45	Rho GTPase activating protein 45 [Source:RGD Symbol;Acc:1308662]	yes|down	1
ENSRNOG00000014508	Mgll	monoglyceride lipase [Source:RGD Symbol;Acc:71039]	yes|up	1
ENSRNOG00000047414	AABR07058479.1		yes|down	1
ENSRNOG00000006940	Ncf4	neutrophil cytosolic factor 4 [Source:RGD Symbol;Acc:1593157]	yes|down	1
ENSRNOG00000009339	Cenpe	centromere protein E [Source:RGD Symbol;Acc:1307115]	yes|down	1
ENSRNOG00000006946	Arhgap9	Rho GTPase activating protein 9 [Source:RGD Symbol;Acc:1305342]	yes|down	1
ENSRNOG00000005711	Ptprd	protein tyrosine phosphatase, receptor type, D [Source:RGD Symbol;Acc:1561090]	yes|up	1
ENSRNOG00000059834	Cib2	calcium and integrin binding family member 2 [Source:RGD Symbol;Acc:1308718]	yes|up	1
ENSRNOG00000014721	Ahrr	aryl-hydrocarbon receptor repressor [Source:RGD Symbol;Acc:1559857]	yes|up	1
ENSRNOG00000005365	Kcnip1	potassium voltage-gated channel interacting protein 1 [Source:RGD Symbol;Acc:70886]	yes|up	1
ENSRNOG00000050658	Tacr2	tachykinin receptor 2 [Source:RGD Symbol;Acc:3812]	yes|up	1
ENSRNOG00000027770	Trpm3	transient receptor potential cation channel, subfamily M, member 3 [Source:RGD Symbol;Acc:1304888]	yes|up	1
ENSRNOG00000010658	LOC103691744	cystathionine gamma-lyase [Source:RGD Symbol;Acc:9153842]	yes|up	1
ENSRNOG00000018351	Thap4	THAP domain containing 4 [Source:RGD Symbol;Acc:1359473]	yes|up	1
ENSRNOG00000004147	Abca8a	ATP-binding cassette, subfamily A (ABC1), member 8a [Source:RGD Symbol;Acc:1307333]	yes|up	1
ENSRNOG00000000836	Ltb	lymphotoxin beta [Source:RGD Symbol;Acc:1303162]	yes|down	1
ENSRNOG00000010650	Plekhh1	pleckstrin homology, MyTH4 and FERM domain containing H1 [Source:RGD Symbol;Acc:1308362]	yes|up	1
ENSRNOG00000050090	Slc6a17	solute carrier family 6 member 17 [Source:RGD Symbol;Acc:1587185]	yes|up	1
ENSRNOG00000010121	Lef1	lymphoid enhancer binding factor 1 [Source:RGD Symbol;Acc:620241]	yes|down	1
ENSRNOG00000030666	LOC108348140	H-2 class I histocompatibility antigen, TLA(B) alpha chain-like [Source:RGD Symbol;Acc:11396749]	yes|up	1
ENSRNOG00000010015	Gp9	glycoprotein IX (platelet) [Source:RGD Symbol;Acc:1561601]	yes|down	1
ENSRNOG00000058405	AABR07061039.1		yes|down	1
ENSRNOG00000042441	LOC103690131	tumor protein D55-like [Source:RGD Symbol;Acc:9223097]	yes|down	1
ENSRNOG00000010018	Clec4a3	C-type lectin domain family 4, member A3 [Source:RGD Symbol;Acc:1359528]	yes|down	1
ENSRNOG00000029830	Adm2	adrenomedullin 2 [Source:RGD Symbol;Acc:1302971]	yes|down	1
ENSRNOG00000038598	AABR07032503.1		yes|down	1
ENSRNOG00000015668	Ccl19	C-C motif chemokine ligand 19 [Source:RGD Symbol;Acc:1310336]	yes|down	1
ENSRNOG00000018874	Phf19	PHD finger protein 19 [Source:RGD Symbol;Acc:1310390]	yes|down	1
ENSRNOG00000016980	Qprt	quinolinate phosphoribosyltransferase [Source:RGD Symbol;Acc:1310309]	yes|down	1
ENSRNOG00000049351	Nat8l	N-acetyltransferase 8-like [Source:RGD Symbol;Acc:1305719]	yes|up	1
ENSRNOG00000050000	AABR07034739.1	Ig lambda-2 chain C region [Source:UniProtKB/Swiss-Prot;Acc:P20767]	yes|down	1
ENSRNOG00000005565	Traf3ip3	TRAF3 interacting protein 3 [Source:RGD Symbol;Acc:1304848]	yes|down	1
ENSRNOG00000001525	Igsf11	immunoglobulin superfamily, member 11 [Source:RGD Symbol;Acc:1308758]	yes|up	1
ENSRNOG00000004560	Cacna1b	calcium voltage-gated channel subunit alpha1 B [Source:RGD Symbol;Acc:628852]	yes|up	1
ENSRNOG00000015529	Cdca3	cell division cycle associated 3 [Source:RGD Symbol;Acc:1359093]	yes|down	1
ENSRNOG00000010721	Dlgap5	DLG associated protein 5 [Source:RGD Symbol;Acc:1311247]	yes|down	1
ENSRNOG00000004440	Fignl1	fidgetin-like 1 [Source:RGD Symbol;Acc:1307112]	yes|down	1
ENSRNOG00000004441	Fcmr	Fc fragment of IgM receptor [Source:RGD Symbol;Acc:1359282]	yes|down	1
ENSRNOG00000032240	Gbp5	guanylate binding protein 5 [Source:RGD Symbol;Acc:1311040]	yes|down	1
ENSRNOG00000049911	LOC102556347	carbonyl reductase [NADPH] 1-like [Source:RGD Symbol;Acc:7631561]	yes|up	1
ENSRNOG00000055936	Trnp1	TMF1-regulated nuclear protein 1 [Source:RGD Symbol;Acc:1582917]	yes|up	1
ENSRNOG00000011205	Ccl3	C-C motif chemokine ligand 3 [Source:RGD Symbol;Acc:3647]	yes|down	1
ENSRNOG00000019046	Reg4	regenerating family member 4 [Source:RGD Symbol;Acc:1303341]	yes|up	1
ENSRNOG00000037757	Calhm6	calcium homeostasis modulator family member 6 [Source:RGD Symbol;Acc:1304835]	yes|down	1
ENSRNOG00000031189	Ido1	indoleamine 2,3-dioxygenase 1 [Source:RGD Symbol;Acc:619989]	yes|down	1
ENSRNOG00000004966	Slc38a11	solute carrier family 38, member 11 [Source:RGD Symbol;Acc:1306005]	yes|up	1
ENSRNOG00000049755	AABR07051534.1		yes|down	1
ENSRNOG00000026669	RT1-Ha	RT1 class II, locus Ha [Source:RGD Symbol;Acc:1595921]	yes|down	1
ENSRNOG00000058539	Ccnb1	cyclin B1 [Source:RGD Symbol;Acc:2291]	yes|down	1
ENSRNOG00000011332	Clspn	claspin [Source:RGD Symbol;Acc:1309083]	yes|down	1
ENSRNOG00000011334	Tmem63c	transmembrane protein 63c [Source:RGD Symbol;Acc:1310207]	yes|up	1
ENSRNOG00000061216	Tubb5	tubulin, beta 5 class I [Source:RGD Symbol;Acc:628596]	yes|down	1
ENSRNOG00000004968	Ncapg2	non-SMC condensin II complex, subunit G2 [Source:RGD Symbol;Acc:1308406]	yes|down	1
ENSRNOG00000061739	Klrk1	killer cell lectin like receptor K1 [Source:RGD Symbol;Acc:3180]	yes|down	1
ENSRNOG00000059720	Syp	synaptophysin [Source:RGD Symbol;Acc:3802]	yes|up	1
ENSRNOG00000023227	AABR07052585.2		yes|down	1
ENSRNOG00000032970	Gpr174	G protein-coupled receptor 174 [Source:RGD Symbol;Acc:1564689]	yes|down	1
ENSRNOG00000061733	LOC103690156	galanin receptor type 2 [Source:RGD Symbol;Acc:9251670]	yes|up	1
ENSRNOG00000017749	Nkg7	natural killer cell granule protein 7 [Source:RGD Symbol;Acc:621523]	yes|up	1
ENSRNOG00000061639	AABR07044404.1		yes|up	1
ENSRNOG00000010342	Zfand1	zinc finger AN1-type containing 1 [Source:RGD Symbol;Acc:1309519]	yes|down	1
ENSRNOG00000015810	Trip13	thyroid hormone receptor interactor 13 [Source:RGD Symbol;Acc:1308516]	yes|down	1
ENSRNOG00000010833	Mthfd2	methylenetetrahydrofolate dehydrogenase (NADP+ dependent) 2, methenyltetrahydrofolate cyclohydrolase [Source:RGD Symbol;Acc:1311313]	yes|down	1
ENSRNOG00000010834	Mpped1	metallophosphoesterase domain containing 1 [Source:RGD Symbol;Acc:1308244]	yes|down	1
ENSRNOG00000015353	Prss12	serine protease 12 [Source:RGD Symbol;Acc:69238]	yes|down	1
ENSRNOG00000061595	Tfec	transcription factor EC [Source:RGD Symbol;Acc:3846]	yes|down	1
ENSRNOG00000010423	Misp	mitotic spindle positioning [Source:RGD Symbol;Acc:1595680]	yes|up	1
ENSRNOG00000054128	AABR07051730.1		yes|down	1
ENSRNOG00000054129	Ctla4	cytotoxic T-lymphocyte-associated protein 4 [Source:RGD Symbol;Acc:61975]	yes|down	1
ENSRNOG00000018382	Inpp4b	inositol polyphosphate-4-phosphatase type II B [Source:RGD Symbol;Acc:620470]	yes|down	1
ENSRNOG00000043044	Cnn2	calponin 2 [Source:RGD Symbol;Acc:1589807]	yes|down	1
ENSRNOG00000018782	Gmnn	geminin, DNA replication inhibitor [Source:RGD Symbol;Acc:1308137]	yes|down	1
ENSRNOG00000002831	Wfikkn2	WAP, follistatin/kazal, immunoglobulin, kunitz and netrin domain containing 2 [Source:RGD Symbol;Acc:1305361]	yes|up	1
ENSRNOG00000009347	Arhgap25	Rho GTPase activating protein 25 [Source:RGD Symbol;Acc:1562105]	yes|down	1
ENSRNOG00000048321	Tnfsf8	TNF superfamily member 8 [Source:RGD Symbol;Acc:1590403]	yes|down	1
ENSRNOG00000016316	Mcm2	minichromosome maintenance complex component 2 [Source:RGD Symbol;Acc:1305577]	yes|down	1
ENSRNOG00000011250	Inmt	indolethylamine N-methyltransferase [Source:RGD Symbol;Acc:1597087]	yes|up	1
ENSRNOG00000023410	Apol9a	apolipoprotein L 9a [Source:RGD Symbol;Acc:1562332]	yes|up	1
ENSRNOG00000023828	LOC680875	similar to dystonin isoform 1 [Source:RGD Symbol;Acc:1587008]	yes|up	1
ENSRNOG00000018373	Tln2	talin 2 [Source:RGD Symbol;Acc:1565416]	yes|up	1
ENSRNOG00000059753	Gys2	glycogen synthase 2 [Source:RGD Symbol;Acc:2773]	yes|up	1
ENSRNOG00000018378	Cacnb2	calcium voltage-gated channel auxiliary subunit beta 2 [Source:RGD Symbol;Acc:67385]	yes|up	1
ENSRNOG00000023257	Adamts9	ADAM metallopeptidase with thrombospondin type 1 motif, 9 [Source:RGD Symbol;Acc:1306889]	yes|down	1
ENSRNOG00000048402	Igh-6	immunoglobulin heavy chain 6 [Source:RGD Symbol;Acc:1359202]	yes|down	1
ENSRNOG00000049185	AABR07061005.1		yes|down	1
ENSRNOG00000019528	Plekhg6	pleckstrin homology and RhoGEF domain containing G6 [Source:RGD Symbol;Acc:2318544]	yes|up	1
ENSRNOG00000047606	Bcl2a1	BCL2-related protein A1 [Source:RGD Symbol;Acc:620621]	yes|down	1
ENSRNOG00000004367	Elk3	ELK3, ETS transcription factor [Source:RGD Symbol;Acc:1307764]	yes|down	1
ENSRNOG00000023093	Mis18bp1	MIS18 binding protein 1 [Source:RGD Symbol;Acc:1594757]	yes|down	1
ENSRNOG00000003401	AABR07029195.1		yes|up	1
ENSRNOG00000008961	Mapre3	microtubule-associated protein, RP/EB family, member 3 [Source:RGD Symbol;Acc:1359297]	yes|up	1
ENSRNOG00000047977	LOC684871	similar to Protein C8orf4 (Thyroid cancer protein 1) (TC-1) [Source:RGD Symbol;Acc:1585525]	yes|up	1
ENSRNOG00000046958	Abo	ABO, alpha 1-3-N-acetylgalactosaminyltransferase and alpha 1-3-galactosyltransferase [Source:RGD Symbol;Acc:2307241]	yes|up	1
ENSRNOG00000052896	AABR07017825.4		yes|down	1
ENSRNOG00000052549	Chga	chromogranin A [Source:RGD Symbol;Acc:2338]	yes|up	1
ENSRNOG00000002723	Sele	selectin E [Source:RGD Symbol;Acc:3654]	yes|down	1
ENSRNOG00000011748	S100a5	S100 calcium binding protein A5 [Source:RGD Symbol;Acc:1308996]	yes|down	1
ENSRNOG00000008165	Tpx2	TPX2, microtubule nucleation factor [Source:RGD Symbol;Acc:1311894]	yes|down	1
ENSRNOG00000000572	Chst3	carbohydrate sulfotransferase 3 [Source:RGD Symbol;Acc:620355]	yes|down	1
ENSRNOG00000048764	AABR07051675.1		yes|down	1
ENSRNOG00000056184	Lrp2	LDL receptor related protein 2 [Source:RGD Symbol;Acc:68407]	yes|down	1
ENSRNOG00000061160	Htra4	HtrA serine peptidase 4 [Source:RGD Symbol;Acc:1306242]	yes|down	1
ENSRNOG00000048660	Haspin	histone H3 associated protein kinase [Source:RGD Symbol;Acc:1596276]	yes|down	1
ENSRNOG00000008463	Rundc3b	RUN domain containing 3B [Source:RGD Symbol;Acc:1587590]	yes|up	1
ENSRNOG00000019704	Resp18	regulated endocrine-specific protein 18 [Source:RGD Symbol;Acc:3555]	yes|up	1
ENSRNOG00000018797	Myrip	myosin VIIA and Rab interacting protein [Source:RGD Symbol;Acc:727731]	yes|up	1
ENSRNOG00000023005	LOC681325	hypothetical protein LOC681325 [Source:RGD Symbol;Acc:1596765]	yes|down	1
ENSRNOG00000052109	AABR07043389.1		yes|up	1
ENSRNOG00000016763	Fgfr4	fibroblast growth factor receptor 4 [Source:RGD Symbol;Acc:2612]	yes|up	1
ENSRNOG00000008513	LOC103690019	protein DBF4 homolog A-like [Source:RGD Symbol;Acc:9449239]	yes|down	1
ENSRNOG00000008416	Gimap5	GTPase, IMAP family member 5 [Source:RGD Symbol;Acc:628871]	yes|down	1
ENSRNOG00000014357	Gja4	gap junction protein, alpha 4 [Source:RGD Symbol;Acc:2691]	yes|down	1
ENSRNOG00000007894	Mpdz	multiple PDZ domain crumbs cell polarity complex component [Source:RGD Symbol;Acc:3105]	yes|up	1
ENSRNOG00000019931	Map3k21	mitogen-activated protein kinase kinase kinase 21 [Source:RGD Symbol;Acc:1306091]	yes|up	1
ENSRNOG00000010906	Ccl5	C-C motif chemokine ligand 5 [Source:RGD Symbol;Acc:69069]	yes|up	1
ENSRNOG00000037188	LOC297568	alpha-1-inhibitor III [Source:RGD Symbol;Acc:1584999]	yes|up	1
ENSRNOG00000008061	Nuak1	NUAK family kinase 1 [Source:RGD Symbol;Acc:1309956]	yes|down	1
ENSRNOG00000007490	Gabrr2	gamma-aminobutyric acid type A receptor rho 2 subunit [Source:RGD Symbol;Acc:61902]	yes|down	1
ENSRNOG00000003538	Adamts4	ADAM metallopeptidase with thrombospondin type 1 motif, 4 [Source:RGD Symbol;Acc:621242]	yes|down	1
ENSRNOG00000047072	LOC100910656	ly-6/neurotoxin-like protein 1-like [Source:RGD Symbol;Acc:6497362]	yes|up	1
ENSRNOG00000011863	Gins3	GINS complex subunit 3 [Source:RGD Symbol;Acc:1308153]	yes|down	1
ENSRNOG00000020400	Mef2b	myocyte enhancer factor 2B [Source:RGD Symbol;Acc:1561733]	yes|down	1
ENSRNOG00000046785	Col23a1	collagen type XXIII alpha 1 chain [Source:RGD Symbol;Acc:727898]	yes|up	1
ENSRNOG00000016460	Clu	clusterin [Source:RGD Symbol;Acc:3907]	yes|down	1
ENSRNOG00000029128	Cyp2d5	cytochrome P450, family 2, subfamily d, polypeptide 5 [Source:RGD Symbol;Acc:628630]	yes|up	1
ENSRNOG00000046782	AABR07006259.1		yes|down	1
ENSRNOG00000012165	Itprid1	ITPR interacting domain containing 1 [Source:RGD Symbol;Acc:1561131]	yes|up	1
ENSRNOG00000012160	Syk	spleen associated tyrosine kinase [Source:RGD Symbol;Acc:3796]	yes|down	1
ENSRNOG00000007091	Ly6e	lymphocyte antigen 6 family member E [Source:RGD Symbol;Acc:1565342]	yes|down	1
ENSRNOG00000007664	Tnfrsf13c	TNF receptor superfamily member 13C [Source:RGD Symbol;Acc:1560810]	yes|down	1
ENSRNOG00000047158	Selenbp1	selenium binding protein 1 [Source:RGD Symbol;Acc:620571]	yes|up	1
ENSRNOG00000008209	St3gal1	ST3 beta-galactoside alpha-2,3-sialyltransferase 1 [Source:RGD Symbol;Acc:1309373]	yes|up	1
ENSRNOG00000008369	Gimap4	GTPase, IMAP family member 4 [Source:RGD Symbol;Acc:628765]	yes|down	1
ENSRNOG00000039859	Dnmt1	DNA methyltransferase 1 [Source:RGD Symbol;Acc:620979]	yes|down	1
ENSRNOG00000060248	Chchd6	coiled-coil-helix-coiled-coil-helix domain containing 6 [Source:RGD Symbol;Acc:1304561]	yes|down	1
ENSRNOG00000025527	Mtcl1	microtubule crosslinking factor 1 [Source:RGD Symbol;Acc:1308319]	yes|up	1
ENSRNOG00000019843	St3gal3	ST3 beta-galactoside alpha-2,3-sialyltransferase 3 [Source:RGD Symbol;Acc:68414]	yes|up	1
ENSRNOG00000006645	Ryr3	ryanodine receptor 3 [Source:RGD Symbol;Acc:68952]	yes|up	1
ENSRNOG00000004487	Nek2	NIMA-related kinase 2 [Source:RGD Symbol;Acc:619792]	yes|down	1
ENSRNOG00000007067	Padi1	peptidyl arginine deiminase 1 [Source:RGD Symbol;Acc:3287]	yes|down	1
ENSRNOG00000022373	Dennd4b	DENN domain containing 4B [Source:RGD Symbol;Acc:1560320]	yes|down	1
ENSRNOG00000000386	Pbld1	phenazine biosynthesis-like protein domain containing 1 [Source:RGD Symbol;Acc:621263]	yes|up	1
ENSRNOG00000029191	Gbp7	similar to guanylate binding protein family, member 6 [Source:NCBI gene;Acc:685067]	yes|down	1
ENSRNOG00000007069	Adhfe1	alcohol dehydrogenase, iron containing, 1 [Source:RGD Symbol;Acc:1308863]	yes|up	1
ENSRNOG00000047415	AABR07060788.1		yes|down	1
ENSRNOG00000025551	Rgs22	regulator of G-protein signaling 22 [Source:RGD Symbol;Acc:1565493]	yes|up	1
ENSRNOG00000002753	Adam11	ADAM metallopeptidase domain 11 [Source:RGD Symbol;Acc:1307515]	yes|down	1
ENSRNOG00000050819	Birc5	baculoviral IAP repeat-containing 5 [Source:RGD Symbol;Acc:70499]	yes|down	1
ENSRNOG00000015072	Ptgr1	prostaglandin reductase 1 [Source:RGD Symbol;Acc:621195]	yes|up	1
ENSRNOG00000015071	Zim1	zinc finger, imprinted 1 [Source:RGD Symbol;Acc:1310930]	yes|up	1
ENSRNOG00000016210	Micalcl	MICAL C-terminal like [Source:RGD Symbol;Acc:735042]	yes|up	1
ENSRNOG00000026502	Dscc1	DNA replication and sister chromatid cohesion 1 [Source:RGD Symbol;Acc:1561749]	yes|down	1
ENSRNOG00000011921	Dusp4	dual specificity phosphatase 4 [Source:RGD Symbol;Acc:620625]	yes|down	1
ENSRNOG00000036826	Glycam1	glycosylation dependent cell adhesion molecule 1 [Source:RGD Symbol;Acc:2712]	yes|down	1
ENSRNOG00000007243	Havcr1	hepatitis A virus cellular receptor 1 [Source:RGD Symbol;Acc:708425]	yes|down	1
ENSRNOG00000022298	Cxcl11	C-X-C motif chemokine ligand 11 [Source:RGD Symbol;Acc:727827]	yes|up	1
ENSRNOG00000036829	Nckap1l	NCK associated protein 1 like [Source:RGD Symbol;Acc:1312032]	yes|down	1
ENSRNOG00000036828	Pde1b	phosphodiesterase 1B [Source:RGD Symbol;Acc:3278]	yes|up	1
ENSRNOG00000008966	Slco5a1	solute carrier organic anion transporter family, member 5A1 [Source:RGD Symbol;Acc:1307132]	yes|down	1
ENSRNOG00000008965	Socs2	suppressor of cytokine signaling 2 [Source:NCBI gene;Acc:84607]	yes|up	1
ENSRNOG00000007896	Klhl38	kelch-like family member 38 [Source:RGD Symbol;Acc:1564169]	yes|up	1
ENSRNOG00000008841	Orc1	origin recognition complex, subunit 1 [Source:RGD Symbol;Acc:631435]	yes|down	1
ENSRNOG00000025735	Wdr86	WD repeat domain 86 [Source:RGD Symbol;Acc:1566180]	yes|down	1
ENSRNOG00000013605	AC120568.1		yes|up	1
ENSRNOG00000012344	Slc7a9	solute carrier family 7 member 9 [Source:RGD Symbol;Acc:619905]	yes|down	1
ENSRNOG00000013167	Hmgb2	high mobility group box 2 [Source:RGD Symbol;Acc:69291]	yes|down	1
ENSRNOG00000008849	Guca2a	guanylate cyclase activator 2A [Source:RGD Symbol;Acc:2766]	yes|up	1
ENSRNOG00000007483	Ccnf	cyclin F [Source:RGD Symbol;Acc:67401]	yes|down	1
ENSRNOG00000006236	Dsn1	DSN1 homolog, MIS12 kinetochore complex component [Source:RGD Symbol;Acc:1565179]	yes|down	1
ENSRNOG00000046309	LOC102553138	ovarian cancer G-protein coupled receptor 1-like [Source:RGD Symbol;Acc:7533718]	yes|down	1
ENSRNOG00000015003	Pex11a	peroxisomal biogenesis factor 11 alpha [Source:RGD Symbol;Acc:619842]	yes|up	1
ENSRNOG00000000596	Fyn	FYN proto-oncogene, Src family tyrosine kinase [Source:RGD Symbol;Acc:2641]	yes|down	1
ENSRNOG00000007393	Ndrg1	N-myc downstream regulated 1 [Source:RGD Symbol;Acc:1307303]	yes|up	1
ENSRNOG00000008560	AABR07049790.1	coiled-coil domain containing 30 [Source:NCBI gene;Acc:362580]	yes|up	1
ENSRNOG00000050888	LOC691320	similar to cytochrome P450 4F1 [Source:RGD Symbol;Acc:1585095]	yes|down	1
ENSRNOG00000001908	Klhl6	kelch-like family member 6 [Source:RGD Symbol;Acc:1307521]	yes|down	1
ENSRNOG00000000456	Psmb8	proteasome subunit beta 8 [Source:RGD Symbol;Acc:3426]	yes|down	1
ENSRNOG00000000454	RT1-DOb	RT1 class II, locus DOb [Source:RGD Symbol;Acc:1595814]	yes|down	1
ENSRNOG00000000699	Selplg	selectin P ligand [Source:RGD Symbol;Acc:1307971]	yes|down	1
ENSRNOG00000043414	Fcrl5	Fc receptor-like 5 [Source:RGD Symbol;Acc:1589379]	yes|down	1
ENSRNOG00000029862	Spc24	SPC24, NDC80 kinetochore complex component [Source:RGD Symbol;Acc:1307631]	yes|down	1
ENSRNOG00000049605	Zfp296	zinc finger protein 296 [Source:RGD Symbol;Acc:1595818]	yes|down	1
ENSRNOG00000000693	Svop	SV2 related protein [Source:RGD Symbol;Acc:620277]	yes|up	1
ENSRNOG00000000451	RT1-Ba	RT1 class II, locus Ba [Source:RGD Symbol;Acc:1595867]	yes|down	1
ENSRNOG00000007437	Irf5	interferon regulatory factor 5 [Source:RGD Symbol;Acc:1310447]	yes|down	1
ENSRNOG00000006280	Pcsk9	proprotein convertase subtilisin/kexin type 9 [Source:RGD Symbol;Acc:728909]	yes|down	1
ENSRNOG00000020699	Cd37	CD37 molecule [Source:RGD Symbol;Acc:62035]	yes|down	1
ENSRNOG00000024693	Zfp831	zinc finger protein 831 [Source:RGD Symbol;Acc:1565819]	yes|down	1
ENSRNOG00000007439	Unc13d	unc-13 homolog D [Source:RGD Symbol;Acc:628593]	yes|down	1
ENSRNOG00000056783	Cd69	Cd69 molecule [Source:RGD Symbol;Acc:61318]	yes|down	1
ENSRNOG00000020132	Ttll10	tubulin tyrosine ligase like 10 [Source:RGD Symbol;Acc:1560839]	yes|up	1
ENSRNOG00000047982	LOC501317	hypothetical LOC501317 [Source:RGD Symbol;Acc:1588425]	yes|up	1
ENSRNOG00000001653	St3gal6	ST3 beta-galactoside alpha-2,3-sialyltransferase 6 [Source:RGD Symbol;Acc:1303279]	yes|down	1
ENSRNOG00000001656	Kcnj15	potassium voltage-gated channel subfamily J member 15 [Source:RGD Symbol;Acc:621662]	yes|down	1
ENSRNOG00000020030	Crlf1	cytokine receptor-like factor 1 [Source:RGD Symbol;Acc:1311371]	yes|down	1
ENSRNOG00000046602	AABR07006030.1		yes|up	1
ENSRNOG00000003136	Fcrla	Fc receptor-like A [Source:RGD Symbol;Acc:1306176]	yes|down	1
ENSRNOG00000013598	Melk	maternal embryonic leucine zipper kinase [Source:RGD Symbol;Acc:1308974]	yes|down	1
ENSRNOG00000029342	Scn7a	sodium voltage-gated channel alpha subunit 7 [Source:RGD Symbol;Acc:61922]	yes|up	1
ENSRNOG00000011992	Slc18a1	solute carrier family 18 member A1 [Source:RGD Symbol;Acc:3693]	yes|up	1
ENSRNOG00000033923	Aox2	aldehyde oxidase 2 [Source:RGD Symbol;Acc:1359668]	yes|up	1
ENSRNOG00000007805	Mybl2	MYB proto-oncogene like 2 [Source:RGD Symbol;Acc:1308474]	yes|down	1
ENSRNOG00000013694	Ntng2	netrin G2 [Source:RGD Symbol;Acc:1307089]	yes|down	1
ENSRNOG00000010515	Trim59	tripartite motif-containing 59 [Source:RGD Symbol;Acc:1311956]	yes|down	1
ENSRNOG00000022999	Ppp2r3a	protein phosphatase 2, regulatory subunit B'', alpha [Source:RGD Symbol;Acc:1306958]	yes|up	1
ENSRNOG00000013690	Clba1	clathrin binding box of aftiphilin containing 1 [Source:RGD Symbol;Acc:1307315]	yes|up	1
ENSRNOG00000059476	AABR07049503.1		yes|up	1
ENSRNOG00000014427	Chrnb4	cholinergic receptor nicotinic beta 4 subunit [Source:RGD Symbol;Acc:2351]	yes|up	1
ENSRNOG00000058545	Arhgap4	Rho GTPase activating protein 4 [Source:RGD Symbol;Acc:628901]	yes|down	1
ENSRNOG00000021100	Tnfaip8l2	TNF alpha induced protein 8 like 2 [Source:RGD Symbol;Acc:1310519]	yes|down	1
ENSRNOG00000014859	Rnf152	ring finger protein 152 [Source:RGD Symbol;Acc:1305251]	yes|up	1
ENSRNOG00000028801	Gsap	gamma-secretase activating protein [Source:RGD Symbol;Acc:1563271]	yes|down	1
ENSRNOG00000001011	Rflna	refilin A [Source:RGD Symbol;Acc:1588777]	yes|down	1
ENSRNOG00000014615	Grk6	G protein-coupled receptor kinase 6 [Source:RGD Symbol;Acc:61986]	yes|down	1
ENSRNOG00000020689	Cpeb3	cytoplasmic polyadenylation element binding protein 3 [Source:RGD Symbol;Acc:1564670]	yes|up	1
ENSRNOG00000020726	Sipa1	signal-induced proliferation-associated 1 [Source:RGD Symbol;Acc:1303184]	yes|down	1
ENSRNOG00000001158	Abcg1	ATP binding cassette subfamily G member 1 [Source:RGD Symbol;Acc:620294]	yes|down	1
ENSRNOG00000001711	Hrasls	HRAS-like suppressor [Source:RGD Symbol;Acc:1309485]	yes|up	1
ENSRNOG00000003348	Rasd1	ras related dexamethasone induced 1 [Source:RGD Symbol;Acc:619727]	yes|up	1
ENSRNOG00000001492	Slc8a2	solute carrier family 8 member A2 [Source:RGD Symbol;Acc:620194]	yes|up	1
ENSRNOG00000059140	Myo1g	myosin IG [Source:RGD Symbol;Acc:1306016]	yes|down	1
ENSRNOG00000019846	Muc5b	mucin 5B, oligomeric mucus/gel-forming [Source:RGD Symbol;Acc:1561983]	yes|up	1
ENSRNOG00000019542	MGC108823	similar to interferon-inducible GTPase [Source:RGD Symbol;Acc:1359421]	yes|down	1
ENSRNOG00000005159	Fam135b	family with sequence similarity 135, member B [Source:RGD Symbol;Acc:1308133]	yes|up	1
ENSRNOG00000001470	Limk1	LIM domain kinase 1 [Source:RGD Symbol;Acc:62055]	yes|down	1
ENSRNOG00000039740	Cenpk	centromere protein K [Source:RGD Symbol;Acc:1310461]	yes|down	1
ENSRNOG00000001570	LOC100363136	hypothetical protein LOC100363136 [Source:RGD Symbol;Acc:2324754]	yes|down	1
ENSRNOG00000005154	Alkal2	ALK and LTK ligand 2 [Source:RGD Symbol;Acc:1587117]	yes|up	1
ENSRNOG00000053200	AABR07068161.1	dedicator of cytokinesis 10 [Source:NCBI gene;Acc:301556]	yes|down	1
ENSRNOG00000001270	Hvcn1	hydrogen voltage-gated channel 1 [Source:RGD Symbol;Acc:1310788]	yes|down	1
ENSRNOG00000057760	Stil	STIL, centriolar assembly protein [Source:RGD Symbol;Acc:1304972]	yes|down	1
ENSRNOG00000027246	LOC100911668	homeobox protein Hox-A10-like [Source:RGD Symbol;Acc:6491746]	yes|up	1
ENSRNOG00000030118	Msn	moesin [Source:RGD Symbol;Acc:621260]	yes|down	1
ENSRNOG00000005971	Gpr176	G protein-coupled receptor 176 [Source:RGD Symbol;Acc:621718]	yes|down	1
ENSRNOG00000020908	LOC303566	E2F1-inducible gene [Source:RGD Symbol;Acc:1305385]	yes|down	1
ENSRNOG00000030111	Cyp11b3	cytochrome P450, family 11, subfamily b, polypeptide 3 [Source:RGD Symbol;Acc:727886]	yes|down	1
ENSRNOG00000005659	Aurkb	aurora kinase B [Source:RGD Symbol;Acc:621625]	yes|down	1
ENSRNOG00000005807	Ptpn7	protein tyrosine phosphatase, non-receptor type 7 [Source:RGD Symbol;Acc:708516]	yes|down	1
ENSRNOG00000000871	Cd40lg	CD40 ligand [Source:RGD Symbol;Acc:708418]	yes|down	1
ENSRNOG00000009832	Slc39a14	solute carrier family 39 member 14 [Source:RGD Symbol;Acc:1307026]	yes|up	1
ENSRNOG00000038197	Cd226	CD226 molecule [Source:RGD Symbol;Acc:1311513]	yes|down	1
ENSRNOG00000057264	Tex49	testis expressed 49 [Source:RGD Symbol;Acc:1305928]	yes|up	1
ENSRNOG00000005809	Arhgdib	Rho GDP dissociation inhibitor beta [Source:RGD Symbol;Acc:1305383]	yes|down	1
ENSRNOG00000030187	Mmp12	matrix metallopeptidase 12 [Source:RGD Symbol;Acc:620195]	yes|down	1
ENSRNOG00000001088	Rfc3	replication factor C subunit 3 [Source:RGD Symbol;Acc:1306832]	yes|down	1
ENSRNOG00000014513	Rexo5	RNA exonuclease 5 [Source:RGD Symbol;Acc:1305412]	yes|up	1
ENSRNOG00000001082	Abcb9	ATP binding cassette subfamily B member 9 [Source:RGD Symbol;Acc:620254]	yes|up	1
ENSRNOG00000010507	Mmp7	matrix metallopeptidase 7 [Source:RGD Symbol;Acc:3100]	yes|down	1
ENSRNOG00000005274	Vrk1	VRK serine/threonine kinase 1 [Source:RGD Symbol;Acc:1306069]	yes|down	1
ENSRNOG00000050318	Fsd1	fibronectin type 3 and SPRY domain-containing protein [Source:MGI Symbol;Acc:MGI:1934858]	yes|up	1
ENSRNOG00000005277	Ptprv	protein tyrosine phosphatase, receptor type, V [Source:RGD Symbol;Acc:621123]	yes|down	1
ENSRNOG00000006932	AABR07029272.1		yes|down	1
ENSRNOG00000005378	Gna15	G protein subunit alpha 15 [Source:RGD Symbol;Acc:619751]	yes|down	1
ENSRNOG00000017874	Cd53	Cd53 molecule [Source:RGD Symbol;Acc:2310]	yes|down	1
ENSRNOG00000004772	Cytip	cytohesin 1 interacting protein [Source:RGD Symbol;Acc:1307990]	yes|down	1
ENSRNOG00000047890	Lrrc23	leucine rich repeat containing 23 [Source:RGD Symbol;Acc:1304779]	yes|down	1
ENSRNOG00000005376	Mad2l1	mitotic arrest deficient 2 like 1 [Source:RGD Symbol;Acc:1310889]	yes|down	1
ENSRNOG00000054265	Ly49si2	immunoreceptor Ly49si2 [Source:RGD Symbol;Acc:1359240]	yes|down	1
ENSRNOG00000005370	S1pr4	sphingosine-1-phosphate receptor 4 [Source:RGD Symbol;Acc:1304801]	yes|down	1
ENSRNOG00000036659	Fn3k	fructosamine 3 kinase [Source:RGD Symbol;Acc:1559983]	yes|up	1
ENSRNOG00000002012	Donson	downstream neighbor of SON [Source:RGD Symbol;Acc:1306823]	yes|down	1
ENSRNOG00000003954	Il2rg	interleukin 2 receptor subunit gamma [Source:RGD Symbol;Acc:621466]	yes|down	1
ENSRNOG00000051630	AABR07069587.2		yes|up	1
ENSRNOG00000004678	Itln1	intelectin 1 [Source:RGD Symbol;Acc:1561048]	yes|up	1
ENSRNOG00000032187	Retnlb	resistin like beta [Source:RGD Symbol;Acc:1624215]	yes|up	1
ENSRNOG00000009715	Me1	malic enzyme 1 [Source:RGD Symbol;Acc:3074]	yes|up	1
ENSRNOG00000010529	Thbs2	thrombospondin 2 [Source:RGD Symbol;Acc:1310979]	yes|down	1
ENSRNOG00000008133	Mfng	MFNG O-fucosylpeptide 3-beta-N-acetylglucosaminyltransferase [Source:RGD Symbol;Acc:735126]	yes|down	1
ENSRNOG00000010306	H2afz	H2A histone family, member Z [Source:RGD Symbol;Acc:621464]	yes|down	1
ENSRNOG00000031058	Was	Wiskott-Aldrich syndrome [Source:RGD Symbol;Acc:1563567]	yes|down	1
ENSRNOG00000038722	Tlr1	toll-like receptor 1 [Source:MGI Symbol;Acc:MGI:1341295]	yes|down	1
ENSRNOG00000031849	Armh4	armadillo-like helical domain containing 4 [Source:RGD Symbol;Acc:1310110]	yes|down	1
ENSRNOG00000062228	LOC100359515	rCG35337-like [Source:RGD Symbol;Acc:2323679]	yes|down	1
ENSRNOG00000016852	Apobec3	apolipoprotein B mRNA editing enzyme catalytic subunit 3 [Source:RGD Symbol;Acc:1307800]	yes|down	1
ENSRNOG00000016853	Dsg1	desmoglein 1 [Source:RGD Symbol;Acc:1309925]	yes|down	1
ENSRNOG00000058434	Cfap99	cilia and flagella associated protein 99 [Source:RGD Symbol;Acc:1564567]	yes|down	1
ENSRNOG00000015773	Il21r	interleukin 21 receptor [Source:RGD Symbol;Acc:1304950]	yes|down	1
ENSRNOG00000062220	Cenpp	centromere protein P [Source:RGD Symbol;Acc:1589530]	yes|down	1
ENSRNOG00000015674	Acap1	ArfGAP with coiled-coil, ankyrin repeat and PH domains 1 [Source:RGD Symbol;Acc:1305360]	yes|down	1
ENSRNOG00000032832	Mmp10	matrix metallopeptidase 10 [Source:RGD Symbol;Acc:620192]	yes|up	1
ENSRNOG00000016995	Zap70	zeta chain of T cell receptor associated protein kinase 70 [Source:RGD Symbol;Acc:3983]	yes|down	1
ENSRNOG00000020505	Map4k1	mitogen activated protein kinase kinase kinase kinase 1 [Source:RGD Symbol;Acc:1305463]	yes|down	1
ENSRNOG00000051600	Ly49i4	Ly49 inhibitory receptor 4 [Source:RGD Symbol;Acc:1549758]	yes|up	1
ENSRNOG00000050034	LOC501297	hypothetical LOC501297 [Source:RGD Symbol;Acc:1589596]	yes|up	1
ENSRNOG00000015519	Ces1d	carboxylesterase 1D [Source:RGD Symbol;Acc:70896]	yes|up	1
ENSRNOG00000005575	Abi3	ABI family, member 3 [Source:RGD Symbol;Acc:1311794]	yes|down	1
ENSRNOG00000004444	Ikzf1	IKAROS family zinc finger 1 [Source:RGD Symbol;Acc:1562979]	yes|down	1
ENSRNOG00000004517	Igf1	insulin-like growth factor 1 [Source:RGD Symbol;Acc:2868]	yes|down	1
ENSRNOG00000009153	Cidec	cell death-inducing DFFA-like effector c [Source:RGD Symbol;Acc:1562113]	yes|up	1
ENSRNOG00000010635	Igfbp4	insulin-like growth factor binding protein 4 [Source:RGD Symbol;Acc:2875]	yes|down	1
ENSRNOG00000003480	Aim2	absent in melanoma 2 [Source:RGD Symbol;Acc:1307283]	yes|down	1
ENSRNOG00000009390	Edn2	endothelin 2 [Source:RGD Symbol;Acc:2533]	yes|up	1
ENSRNOG00000049925	Cd79al	Cd79a molecule-like [Source:RGD Symbol;Acc:1598036]	yes|down	1
ENSRNOG00000037211	Kif14	kinesin family member 14 [Source:RGD Symbol;Acc:1310650]	yes|down	1
ENSRNOG00000028992	Acan	aggrecan [Source:RGD Symbol;Acc:68358]	yes|up	1
ENSRNOG00000059997	Brip1	BRCA1 interacting protein C-terminal helicase 1 [Source:RGD Symbol;Acc:1307659]	yes|down	1
ENSRNOG00000029911	Cilp	cartilage intermediate layer protein [Source:RGD Symbol;Acc:1305124]	yes|down	1
ENSRNOG00000004994	Agr3	anterior gradient 3, protein disulphide isomerase family member [Source:RGD Symbol;Acc:1565406]	yes|up	1
ENSRNOG00000059322	N4bp2l1	NEDD4 binding protein 2-like 1 [Source:RGD Symbol;Acc:1595713]	yes|down	1
ENSRNOG00000062088	AC242859.1		yes|up	1
ENSRNOG00000005776	Bcl11b	BCL11B, BAF complex component [Source:RGD Symbol;Acc:1311128]	yes|down	1
ENSRNOG00000004682	Parpbp	PARP1 binding protein [Source:RGD Symbol;Acc:2314264]	yes|down	1
ENSRNOG00000010824	Parp8	poly (ADP-ribose) polymerase family, member 8 [Source:NCBI gene;Acc:294762]	yes|down	1
ENSRNOG00000054136	Xkrx	XK related, X-linked [Source:RGD Symbol;Acc:1359223]	yes|down	1
ENSRNOG00000018394	Chrdl2	chordin-like 2 [Source:RGD Symbol;Acc:1306179]	yes|down	1
ENSRNOG00000010986	Cmtm7	CKLF-like MARVEL transmembrane domain containing 7 [Source:RGD Symbol;Acc:1591926]	yes|down	1
ENSRNOG00000043077	Zfpm1	zinc finger protein, multitype 1 [Source:RGD Symbol;Acc:1582810]	yes|down	1
ENSRNOG00000032426	Slc10a5	solute carrier family 10, member 5 [Source:RGD Symbol;Acc:1306036]	yes|up	1
ENSRNOG00000045801	Abo2	histo-blood group ABO system transferase 2 [Source:RGD Symbol;Acc:1311152]	yes|up	1
ENSRNOG00000016670	AABR07028769.1		yes|down	1
ENSRNOG00000000463	Col11a2	collagen type XI alpha 2 chain [Source:RGD Symbol;Acc:2373]	yes|up	1
ENSRNOG00000011211	Pex5l	peroxisomal biogenesis factor 5-like [Source:RGD Symbol;Acc:708407]	yes|up	1
ENSRNOG00000062157	AC241808.2		yes|up	1
ENSRNOG00000005787	Erp27	endoplasmic reticulum protein 27 [Source:RGD Symbol;Acc:1565381]	yes|down	1
ENSRNOG00000017645	Mylpf	myosin light chain, phosphorylatable, fast skeletal muscle [Source:RGD Symbol;Acc:3141]	yes|down	1
ENSRNOG00000059662	AABR07004228.1		yes|down	1
ENSRNOG00000059660	AABR07065531.5		yes|up	1
ENSRNOG00000014117	Hmox1	heme oxygenase 1 [Source:RGD Symbol;Acc:2806]	yes|down	1
ENSRNOG00000048411	Uhrf1	ubiquitin-like with PHD and ring finger domains 1 [Source:RGD Symbol;Acc:1595855]	yes|down	1
ENSRNOG00000018092	Cd83	CD83 molecule [Source:RGD Symbol;Acc:1309677]	yes|down	1
ENSRNOG00000004195	Dtl	denticleless E3 ubiquitin protein ligase homolog [Source:RGD Symbol;Acc:1310439]	yes|down	1
ENSRNOG00000014294	Ptpn6	protein tyrosine phosphatase, non-receptor type 6 [Source:RGD Symbol;Acc:620660]	yes|down	1
ENSRNOG00000054524	Tnip3	TNFAIP3 interacting protein 3 [Source:RGD Symbol;Acc:1588732]	yes|down	1
ENSRNOG00000033984	Ifnlr1	interferon, lambda receptor 1 [Source:RGD Symbol;Acc:1562689]	yes|up	1
ENSRNOG00000015614	Ppp1r16b	protein phosphatase 1, regulatory subunit 16B [Source:RGD Symbol;Acc:1589460]	yes|down	1
ENSRNOG00000011170	RGD1359634	similar to RIKEN cDNA 1700088E04 [Source:RGD Symbol;Acc:1359634]	yes|up	1
ENSRNOG00000011171	Rims3	regulating synaptic membrane exocytosis 3 [Source:RGD Symbol;Acc:628762]	yes|up	1
ENSRNOG00000023881	Skap1	src kinase associated phosphoprotein 1 [Source:RGD Symbol;Acc:708436]	yes|down	1
ENSRNOG00000037409	Scimp	SLP adaptor and CSK interacting membrane protein [Source:RGD Symbol;Acc:1593299]	yes|down	1
ENSRNOG00000000567	Unc5b	unc-5 netrin receptor B [Source:RGD Symbol;Acc:621756]	yes|up	1
ENSRNOG00000018488	Cd40	CD40 molecule [Source:RGD Symbol;Acc:619830]	yes|down	1
ENSRNOG00000000562	Prf1	perforin 1 [Source:RGD Symbol;Acc:708463]	yes|down	1
ENSRNOG00000016377	Cep55	centrosomal protein 55 [Source:RGD Symbol;Acc:1305340]	yes|down	1
ENSRNOG00000011074	Calcb	calcitonin-related polypeptide, beta [Source:RGD Symbol;Acc:620997]	yes|up	1
ENSRNOG00000002693	Nme1	NME/NM23 nucleoside diphosphate kinase 1 [Source:RGD Symbol;Acc:70497]	yes|down	1
ENSRNOG00000018644	Slc6a7	solute carrier family 6 member 7 [Source:RGD Symbol;Acc:620928]	yes|up	1
ENSRNOG00000047799	Gnb5	G protein subunit beta 5 [Source:RGD Symbol;Acc:620759]	yes|up	1
ENSRNOG00000004479	Aurka	aurora kinase A [Source:RGD Symbol;Acc:628895]	yes|down	1
ENSRNOG00000026762	RT1-DOa	RT1 class II, locus DOa [Source:RGD Symbol;Acc:3477]	yes|down	1
ENSRNOG00000022044	Cabp4	calcium binding protein 4 [Source:RGD Symbol;Acc:1306083]	yes|down	1
ENSRNOG00000023068	Cd5l	Cd5 molecule-like [Source:RGD Symbol;Acc:1308526]	yes|down	1
ENSRNOG00000016174	Slc35b3	solute carrier family 35 member B3 [Source:RGD Symbol;Acc:1307183]	yes|up	1
ENSRNOG00000042318	Pglyrp2	peptidoglycan recognition protein 2 [Source:RGD Symbol;Acc:1359183]	yes|down	1
ENSRNOG00000048706	Nox1	NADPH oxidase 1 [Source:RGD Symbol;Acc:620598]	yes|down	1
ENSRNOG00000014202	Snx20	sorting nexin 20 [Source:RGD Symbol;Acc:1307787]	yes|down	1
ENSRNOG00000019022	Fam89a	family with sequence similarity 89, member A [Source:RGD Symbol;Acc:1309879]	yes|up	1
ENSRNOG00000008177	Pim2	Pim-2 proto-oncogene, serine/threonine kinase [Source:RGD Symbol;Acc:1560759]	yes|down	1
ENSRNOG00000034290	Ccl21	C-C motif chemokine ligand 21 [Source:RGD Symbol;Acc:1311996]	yes|down	1
ENSRNOG00000014205	Klf2	Kruppel-like factor 2 [Source:RGD Symbol;Acc:1359220]	yes|down	1
ENSRNOG00000004226	Irak3	interleukin-1 receptor-associated kinase 3 [Source:RGD Symbol;Acc:1308846]	yes|down	1
ENSRNOG00000060376	LOC100910237	uncharacterized LOC100910237 [Source:RGD Symbol;Acc:6499508]	yes|down	1
ENSRNOG00000015498	Il17rb	interleukin 17 receptor B [Source:RGD Symbol;Acc:1311392]	yes|up	1
ENSRNOG00000019430	Coro1a	coronin 1A [Source:RGD Symbol;Acc:620009]	yes|down	1
ENSRNOG00000046834	C3	complement C3 [Source:RGD Symbol;Acc:2232]	yes|down	1
ENSRNOG00000029131	AABR07024637.1		yes|down	1
ENSRNOG00000012371	Car7	carbonic anhydrase 7 [Source:RGD Symbol;Acc:1306842]	yes|up	1
ENSRNOG00000042220	Vsx1	visual system homeobox 1 [Source:RGD Symbol;Acc:1305667]	yes|down	1
ENSRNOG00000017981	Mcm10	minichromosome maintenance 10 replication initiation factor [Source:RGD Symbol;Acc:1311330]	yes|down	1
ENSRNOG00000024923	Nnat	neuronatin [Source:RGD Symbol;Acc:620155]	yes|up	1
ENSRNOG00000018735	Cd74	CD74 molecule [Source:RGD Symbol;Acc:2313]	yes|down	1
ENSRNOG00000016512	Sema3b	semaphorin 3B [Source:RGD Symbol;Acc:1310079]	yes|up	1
ENSRNOG00000047080	Gng4	G protein subunit gamma 4 [Source:RGD Symbol;Acc:620806]	yes|up	1
ENSRNOG00000017828	Egr3	early growth response 3 [Source:RGD Symbol;Acc:2545]	yes|down	1
ENSRNOG00000007129	Cd8b	CD8b molecule [Source:RGD Symbol;Acc:2317]	yes|down	1
ENSRNOG00000019435	Psd	pleckstrin and Sec7 domain containing [Source:RGD Symbol;Acc:620297]	yes|up	1
ENSRNOG00000012852	Bin1	bridging integrator 1 [Source:RGD Symbol;Acc:621786]	yes|down	1
ENSRNOG00000034266	Ccdc63	coiled-coil domain containing 63 [Source:RGD Symbol;Acc:1562334]	yes|up	1
ENSRNOG00000008217	Madcam1	mucosal vascular addressin cell adhesion molecule 1 [Source:RGD Symbol;Acc:3029]	yes|down	1
ENSRNOG00000012674	Adrb3	adrenoceptor beta 3 [Source:RGD Symbol;Acc:2061]	yes|up	1
ENSRNOG00000017917	Cdhr2	cadherin-related family member 2 [Source:RGD Symbol;Acc:1560576]	yes|up	1
ENSRNOG00000001869	Rab44	RAB44, member RAS oncogene family [Source:RGD Symbol;Acc:1560150]	yes|up	1
ENSRNOG00000019854	Napsa	napsin A aspartic peptidase [Source:RGD Symbol;Acc:61940]	yes|down	1
ENSRNOG00000023661	Celf2	CUGBP, Elav-like family member 2 [Source:RGD Symbol;Acc:68347]	yes|down	1
ENSRNOG00000008676	Emp1	epithelial membrane protein 1 [Source:RGD Symbol;Acc:2552]	yes|up	1
ENSRNOG00000002276	Phf6	PHD finger protein 6 [Source:RGD Symbol;Acc:2323526]	yes|down	1
ENSRNOG00000012481	Ppm1j	protein phosphatase, Mg2+/Mn2+ dependent, 1J [Source:RGD Symbol;Acc:1359104]	yes|up	1
ENSRNOG00000017850	Dctpp1	dCTP pyrophosphatase 1 [Source:RGD Symbol;Acc:620933]	yes|down	1
ENSRNOG00000060655	AABR07006713.1		yes|up	1
ENSRNOG00000004928	Sntg2	syntrophin, gamma 2 [Source:RGD Symbol;Acc:1311276]	yes|up	1
ENSRNOG00000015082	Nlrp10	NLR family, pyrin domain containing 10 [Source:RGD Symbol;Acc:1307387]	yes|down	1
ENSRNOG00000015086	Plin1	perilipin 1 [Source:RGD Symbol;Acc:3351]	yes|up	1
ENSRNOG00000047314	Tk1	thymidine kinase 1 [Source:RGD Symbol;Acc:621014]	yes|down	1
ENSRNOG00000025584	Agap2	ArfGAP with GTPase domain, ankyrin repeat and PH domain 2 [Source:RGD Symbol;Acc:628844]	yes|down	1
ENSRNOG00000052173	AABR07008439.1	RAN binding protein 3-like [Source:NCBI gene;Acc:294789]	yes|up	1
ENSRNOG00000008919	Arpp21	cAMP regulated phosphoprotein 21 [Source:RGD Symbol;Acc:1593239]	yes|down	1
ENSRNOG00000019907	Nfkbie	NFKB inhibitor epsilon [Source:RGD Symbol;Acc:735070]	yes|down	1
ENSRNOG00000019518	Pde4c	phosphodiesterase 4C [Source:RGD Symbol;Acc:727918]	yes|up	1
ENSRNOG00000011917	Cd79b	CD79b molecule [Source:RGD Symbol;Acc:620012]	yes|down	1
ENSRNOG00000021243	Siglec1	sialic acid binding Ig like lectin 1 [Source:RGD Symbol;Acc:1311953]	yes|down	1
ENSRNOG00000022136	LOC685680	similar to TPA-induced transmembrane protein [Source:RGD Symbol;Acc:1591333]	yes|up	1
ENSRNOG00000021987	Tnfrsf17	TNF receptor superfamily member 17 [Source:RGD Symbol;Acc:1304703]	yes|down	1
ENSRNOG00000007332	Sstr3	somatostatin receptor 3 [Source:RGD Symbol;Acc:620308]	yes|down	1
ENSRNOG00000061230	L1cam	L1 cell adhesion molecule [Source:RGD Symbol;Acc:619777]	yes|up	1
ENSRNOG00000021248	Cdc25b	cell division cycle 25B [Source:RGD Symbol;Acc:621500]	yes|down	1
ENSRNOG00000006200	St18	ST18, C2H2C-type zinc finger [Source:RGD Symbol;Acc:708566]	yes|up	1
ENSRNOG00000024757	AABR07069219.1		yes|up	1
ENSRNOG00000024207	Fgfrl1	fibroblast growth factor receptor-like 1 [Source:RGD Symbol;Acc:735156]	yes|up	1
ENSRNOG00000013850	Hes5	hes family bHLH transcription factor 5 [Source:RGD Symbol;Acc:621340]	yes|down	1
ENSRNOG00000040215	LOC100910526	sulfotransferase 1C2-like [Source:RGD Symbol;Acc:6497849]	yes|up	1
ENSRNOG00000024729	Pax5	paired box 5 [Source:RGD Symbol;Acc:1565236]	yes|down	1
ENSRNOG00000021062	Fxyd5	FXYD domain-containing ion transport regulator 5 [Source:RGD Symbol;Acc:620827]	yes|down	1
ENSRNOG00000042139	Clec4a1	C-type lectin domain family 4, member A1 [Source:RGD Symbol;Acc:1359109]	yes|down	1
ENSRNOG00000042137	Tmem173	transmembrane protein 173 [Source:RGD Symbol;Acc:1562552]	yes|down	1
ENSRNOG00000042133	AABR07006275.1		yes|down	1
ENSRNOG00000007341	Mroh8	maestro heat-like repeat family member 8 [Source:RGD Symbol;Acc:2321481]	yes|up	1
ENSRNOG00000002350	Eaf2	ELL associated factor 2 [Source:RGD Symbol;Acc:628879]	yes|down	1
ENSRNOG00000025059	Nxph4	neurexophilin 4 [Source:RGD Symbol;Acc:628723]	yes|down	1
ENSRNOG00000007422	Vav2	vav guanine nucleotide exchange factor 2 [Source:RGD Symbol;Acc:1306285]	yes|down	1
ENSRNOG00000000446	LOC100911983	butyrophilin subfamily 3 member A3-like [Source:RGD Symbol;Acc:6489601]	yes|up	1
ENSRNOG00000020125	AABR07002700.1	CD79a molecule [Source:NCBI gene;Acc:100913063]	yes|down	1
ENSRNOG00000053179	LOC691277	similar to Robo-1 [Source:RGD Symbol;Acc:1586234]	yes|up	1
ENSRNOG00000001313	Gnaz	G protein subunit alpha z [Source:RGD Symbol;Acc:2717]	yes|up	1
ENSRNOG00000046050	Dennd1c	DENN/MADD domain containing 1C [Source:MGI Symbol;Acc:MGI:1918035]	yes|down	1
ENSRNOG00000010421	Wdr91	WD repeat domain 91 [Source:RGD Symbol;Acc:1306697]	yes|down	1
ENSRNOG00000000768	Ubd	ubiquitin D [Source:RGD Symbol;Acc:69418]	yes|down	1
ENSRNOG00000004861	Itga4	integrin subunit alpha 4 [Source:RGD Symbol;Acc:1593249]	yes|down	1
ENSRNOG00000046207	Cbx4	chromobox 4 [Source:RGD Symbol;Acc:1587243]	yes|up	1
ENSRNOG00000056701	Gtf2a2	general transcription factor 2A subunit 2 [Source:RGD Symbol;Acc:620720]	yes|down	1
ENSRNOG00000006311	Ccr9	C-C motif chemokine receptor 9 [Source:RGD Symbol;Acc:628750]	yes|down	1
ENSRNOG00000000634	Cabcoco1	ciliary associated calcium binding coiled-coil 1 [Source:RGD Symbol;Acc:1306739]	yes|down	1
ENSRNOG00000058566	LOC103694381	lymphotoxin-beta [Source:RGD Symbol;Acc:9083628]	yes|down	1
ENSRNOG00000042041	Gal3st1	galactose-3-O-sulfotransferase 1 [Source:RGD Symbol;Acc:1583379]	yes|up	1
ENSRNOG00000051999	AABR07060352.1		yes|down	1
ENSRNOG00000002599	Grap	GRB2-related adaptor protein [Source:RGD Symbol;Acc:1306884]	yes|down	1
ENSRNOG00000020993	Ms4a2	membrane spanning 4-domains A2 [Source:RGD Symbol;Acc:2598]	yes|up	1
ENSRNOG00000022822	Fam169b	family with sequence similarity 169, member B [Source:RGD Symbol;Acc:1585883]	yes|down	1
ENSRNOG00000012756	Slc25a43	solute carrier family 25, member 43 [Source:RGD Symbol;Acc:1559928]	yes|down	1
ENSRNOG00000011989	Vat1l	vesicle amine transport 1-like [Source:RGD Symbol;Acc:1598315]	yes|up	1
ENSRNOG00000020997	Ms4a4c	membrane-spanning 4-domains, subfamily A, member 4C [Source:RGD Symbol;Acc:1583863]	yes|down	1
ENSRNOG00000029535	Nrbp2	nuclear receptor binding protein 2 [Source:RGD Symbol;Acc:1591749]	yes|up	1
ENSRNOG00000002181	Helq	helicase, POLQ-like [Source:RGD Symbol;Acc:1560216]	yes|down	1
ENSRNOG00000001369	Oas1a	2'-5' oligoadenylate synthetase 1A [Source:RGD Symbol;Acc:621760]	yes|up	1
ENSRNOG00000009198	Rab6b	RAB6B, member RAS oncogene family [Source:RGD Symbol;Acc:1309958]	yes|up	1
ENSRNOG00000007687	Sema7a	semaphorin 7A (John Milton Hagen blood group) [Source:RGD Symbol;Acc:1305192]	yes|down	1
ENSRNOG00000013408	Npas2	neuronal PAS domain protein 2 [Source:RGD Symbol;Acc:1309681]	yes|up	1
ENSRNOG00000001367	Gpc2	glypican 2 [Source:RGD Symbol;Acc:621363]	yes|up	1
ENSRNOG00000059461	B4galt1	beta-1,4-galactosyltransferase 1 [Source:RGD Symbol;Acc:620900]	yes|down	1
ENSRNOG00000001001	Retn	resistin [Source:RGD Symbol;Acc:628781]	yes|up	1
ENSRNOG00000001005	Fcer2	Fc fragment of IgE receptor II [Source:RGD Symbol;Acc:619997]	yes|down	1
ENSRNOG00000053771	Itprip	inositol 1,4,5-trisphosphate receptor interacting protein [Source:RGD Symbol;Acc:6488464]	yes|down	1
ENSRNOG00000020873	Nphs1	NPHS1 nephrin [Source:RGD Symbol;Acc:620460]	yes|down	1
ENSRNOG00000020872	Cd5	Cd5 molecule [Source:RGD Symbol;Acc:2309]	yes|down	1
ENSRNOG00000015867	Chst9	carbohydrate sulfotransferase 9 [Source:RGD Symbol;Acc:1307302]	yes|up	1
ENSRNOG00000014686	Kcnd3	potassium voltage-gated channel subfamily D member 3 [Source:RGD Symbol;Acc:68394]	yes|up	1
ENSRNOG00000051907	AABR07017818.1	mCG140239-like [Source:NCBI gene;Acc:100362949]	yes|down	1
ENSRNOG00000051906	AABR07035561.2		yes|down	1
ENSRNOG00000001480	Ncf1	neutrophil cytosolic factor 1 [Source:RGD Symbol;Acc:61307]	yes|down	1
ENSRNOG00000007906	Bub1b	BUB1 mitotic checkpoint serine/threonine kinase B [Source:RGD Symbol;Acc:619791]	yes|down	1
ENSRNOG00000028077	Cfap44	cilia and flagella associated protein 44 [Source:RGD Symbol;Acc:1559942]	yes|down	1
ENSRNOG00000017346	Myt1	myelin transcription factor 1 [Source:RGD Symbol;Acc:1304899]	yes|up	1
ENSRNOG00000023459	Lurap1	leucine rich adaptor protein 1 [Source:RGD Symbol;Acc:1566001]	yes|up	1
ENSRNOG00000001469	Eln	elastin [Source:RGD Symbol;Acc:67394]	yes|down	1
ENSRNOG00000028616	Pck1	phosphoenolpyruvate carboxykinase 1 [Source:RGD Symbol;Acc:3267]	yes|up	1
ENSRNOG00000049314	AABR07069524.1		yes|down	1
ENSRNOG00000017226	Slc2a4	solute carrier family 2 member 4 [Source:RGD Symbol;Acc:2711]	yes|up	1
ENSRNOG00000050482	Dbf4	DBF4 zinc finger [Source:RGD Symbol;Acc:1305854]	yes|down	1
ENSRNOG00000050123	Gdf5	growth differentiation factor 5 [Source:RGD Symbol;Acc:620102]	yes|down	1
ENSRNOG00000005907	Rad18	RAD18 E3 ubiquitin protein ligase [Source:RGD Symbol;Acc:1306993]	yes|down	1
ENSRNOG00000061910	Igfbp3	insulin-like growth factor binding protein 3 [Source:RGD Symbol;Acc:2874]	yes|up	1
ENSRNOG00000004841	Akap6	A-kinase anchoring protein 6 [Source:RGD Symbol;Acc:69412]	yes|up	1
ENSRNOG00000057101	AABR07050652.1		yes|up	1
ENSRNOG00000000961	Glt1d1	glycosyltransferase 1 domain containing 1 [Source:RGD Symbol;Acc:1304896]	yes|up	1
ENSRNOG00000050413	Samd15	sterile alpha motif domain containing 15 [Source:RGD Symbol;Acc:1589368]	yes|down	1
ENSRNOG00000030462	Ostn	osteocrin [Source:RGD Symbol;Acc:1303110]	yes|down	1
ENSRNOG00000000969	Cyp3a18	cytochrome P450, family 3, subfamily a, polypeptide 18 [Source:RGD Symbol;Acc:628709]	yes|down	1
ENSRNOG00000009822	Tlr2	toll-like receptor 2 [Source:RGD Symbol;Acc:735138]	yes|down	1
ENSRNOG00000057273	AABR07062157.1		yes|down	1
ENSRNOG00000009531	Col9a3	collagen type IX alpha 3 chain [Source:RGD Symbol;Acc:1310255]	yes|down	1
ENSRNOG00000050419	Avil	advillin [Source:RGD Symbol;Acc:620301]	yes|up	1
ENSRNOG00000013321	Dock11	dedicator of cytokinesis 11 [Source:RGD Symbol;Acc:1564707]	yes|down	1
ENSRNOG00000054812	AABR07017846.1		yes|down	1
ENSRNOG00000042944	Cenpw	centromere protein W [Source:RGD Symbol;Acc:1593465]	yes|down	1
ENSRNOG00000058726	AABR07054837.1		yes|up	1
ENSRNOG00000013241	Cyp2c24	cytochrome P450, family 2, subfamily c, polypeptide 24 [Source:RGD Symbol;Acc:1563697]	yes|up	1
ENSRNOG00000029993	Kynu	kynureninase [Source:RGD Symbol;Acc:71061]	yes|down	1
ENSRNOG00000005269	Srl	sarcalumenin [Source:RGD Symbol;Acc:1306564]	yes|up	1
ENSRNOG00000005268	Gnat3	G protein subunit alpha transducin 3 [Source:RGD Symbol;Acc:727817]	yes|up	1
ENSRNOG00000001216	Trpm2	transient receptor potential cation channel, subfamily M, member 2 [Source:RGD Symbol;Acc:1311889]	yes|down	1
ENSRNOG00000053850	Rdh5	retinol dehydrogenase 5 [Source:RGD Symbol;Acc:1308849]	yes|up	1
ENSRNOG00000025981	Ska2	spindle and kinetochore associated complex subunit 2 [Source:RGD Symbol;Acc:1307084]	yes|down	1
ENSRNOG00000054251	Clec7a	C-type lectin domain containing 7A [Source:RGD Symbol;Acc:1565140]	yes|down	1
ENSRNOG00000020478	Camk4	calcium/calmodulin-dependent protein kinase IV [Source:RGD Symbol;Acc:2264]	yes|down	1
ENSRNOG00000051235	C2	complement C2 [Source:RGD Symbol;Acc:2231]	yes|down	1
ENSRNOG00000005342	Rassf5	Ras association domain family member 5 [Source:RGD Symbol;Acc:621694]	yes|down	1
ENSRNOG00000004168	Slc35e4	solute carrier family 35, member E4 [Source:RGD Symbol;Acc:708484]	yes|up	1
ENSRNOG00000054319	LOC103690128	smoothelin-like [Source:RGD Symbol;Acc:9196123]	yes|up	1
ENSRNOG00000060100	Knl1	kinetochore scaffold 1 [Source:RGD Symbol;Acc:1307498]	yes|down	1
ENSRNOG00000031431	Cdca8	cell division cycle associated 8 [Source:RGD Symbol;Acc:1566306]	yes|down	1
ENSRNOG00000019495	Gbx2	gastrulation brain homeobox 2 [Source:RGD Symbol;Acc:621866]	yes|down	1
ENSRNOG00000023841	Cd99l2	CD99 molecule-like 2 [Source:RGD Symbol;Acc:620896]	yes|up	1
ENSRNOG00000031343	Nxpe5	neurexophilin and PC-esterase domain family, member 5 [Source:RGD Symbol;Acc:1588255]	yes|down	1
ENSRNOG00000031342	AABR07063082.1		yes|down	1
ENSRNOG00000016846	Pik3cd	phosphatidylinositol-4,5-bisphosphate 3-kinase, catalytic subunit delta [Source:RGD Symbol;Acc:1310990]	yes|down	1
ENSRNOG00000017539	Mmp9	matrix metallopeptidase 9 [Source:RGD Symbol;Acc:621320]	yes|down	1
ENSRNOG00000020579	Col7a1	collagen type VII alpha 1 chain [Source:RGD Symbol;Acc:1311417]	yes|down	1
ENSRNOG00000028910	Ccdc9b	coiled-coil domain containing 9B [Source:RGD Symbol;Acc:1565536]	yes|up	1
ENSRNOG00000059910	AABR07051689.1		yes|down	1
ENSRNOG00000062090	Sry	sex determining region Y [Source:RGD Symbol;Acc:3759]	yes|up	1
ENSRNOG00000004110	Trib2	tribbles pseudokinase 2 [Source:RGD Symbol;Acc:1564451]	yes|down	1
ENSRNOG00000062098	AC242859.2		yes|up	1
ENSRNOG00000010625	Dnmt3b	DNA methyltransferase 3 beta [Source:RGD Symbol;Acc:1303274]	yes|down	1
ENSRNOG00000010626	Sphk1	sphingosine kinase 1 [Source:RGD Symbol;Acc:620048]	yes|down	1
ENSRNOG00000010210	Slc7a11	solute carrier family 7 member 11 [Source:RGD Symbol;Acc:1309275]	yes|down	1
ENSRNOG00000022792	Lamp3	lysosomal-associated membrane protein 3 [Source:RGD Symbol;Acc:1307928]	yes|down	1
ENSRNOG00000012815	Chst10	carbohydrate sulfotransferase 10 [Source:RGD Symbol;Acc:621216]	yes|down	1
ENSRNOG00000015774	Mreg	melanoregulin [Source:RGD Symbol;Acc:1562333]	yes|down	1
ENSRNOG00000016837	Ckm	creatine kinase, M-type [Source:RGD Symbol;Acc:2358]	yes|up	1
ENSRNOG00000036693	Slc25a10	solute carrier family 25 member 10 [Source:RGD Symbol;Acc:621430]	yes|up	1
ENSRNOG00000010866	Tmem154	transmembrane protein 154 [Source:RGD Symbol;Acc:1563262]	yes|down	1
ENSRNOG00000001955	Retnla	resistin like alpha [Source:RGD Symbol;Acc:68349]	yes|up	1
ENSRNOG00000061968	AABR07064878.1		yes|up	1
ENSRNOG00000005747	Il27ra	interleukin 27 receptor subunit alpha [Source:RGD Symbol;Acc:1305029]	yes|down	1
ENSRNOG00000059352	AABR07040284.1		yes|down	1
ENSRNOG00000006996	Mms22l	MMS22-like, DNA repair protein [Source:RGD Symbol;Acc:1304693]	yes|down	1
ENSRNOG00000002468	Tnr	tenascin R [Source:RGD Symbol;Acc:3886]	yes|up	1
ENSRNOG00000004695	Celf5	CUGBP, Elav-like family member 5 [Source:RGD Symbol;Acc:1565016]	yes|up	1
ENSRNOG00000039396	Btnl3	butyrophilin-like 3 [Source:RGD Symbol;Acc:1303262]	yes|up	1
ENSRNOG00000022537	E2f8	E2F transcription factor 8 [Source:RGD Symbol;Acc:1308091]	yes|down	1
ENSRNOG00000047951	LOC103689922	homeobox protein Hox-A5 [Source:RGD Symbol;Acc:9260675]	yes|up	1
ENSRNOG00000047957	Traf5	TNF receptor-associated factor 5 [Source:MGI Symbol;Acc:MGI:107548]	yes|down	1
ENSRNOG00000049491	LOC108348139	class II histocompatibility antigen, M beta 1 chain [Source:RGD Symbol;Acc:11469141]	yes|down	1
ENSRNOG00000004341	LOC498222	similar to specifically androgen-regulated protein [Source:RGD Symbol;Acc:1565034]	yes|up	1
ENSRNOG00000015478	Aicda	activation-induced cytidine deaminase [Source:RGD Symbol;Acc:1303222]	yes|down	1
ENSRNOG00000055689	AABR07052611.2		yes|down	1
ENSRNOG00000011500	Pou2af1	POU class 2 associating factor 1 [Source:RGD Symbol;Acc:1594728]	yes|down	1
ENSRNOG00000002852	Myo19	myosin XIX [Source:RGD Symbol;Acc:1559961]	yes|up	1
ENSRNOG00000037076	LOC689757	similar to osteoclast inhibitory lectin [Source:RGD Symbol;Acc:1588731]	yes|down	1
ENSRNOG00000049547	Tnfsf11	TNF superfamily member 11 [Source:RGD Symbol;Acc:620784]	yes|down	1
ENSRNOG00000020148	Il4i1	interleukin 4 induced 1 [Source:RGD Symbol;Acc:1304831]	yes|down	1
ENSRNOG00000018311	Cd19	CD19 molecule [Source:RGD Symbol;Acc:1309086]	yes|down	1
ENSRNOG00000016782	Tnfrsf8	TNF receptor superfamily member 8 [Source:RGD Symbol;Acc:3879]	yes|down	1
ENSRNOG00000037673	AABR07071891.2		yes|down	1
ENSRNOG00000039300	Ahcyl2	adenosylhomocysteinase-like 2 [Source:RGD Symbol;Acc:1564895]	yes|up	1
ENSRNOG00000051194	LOC108352134	uncharacterized LOC108352134 [Source:RGD Symbol;Acc:11507030]	yes|up	1
ENSRNOG00000059186	AC108351.3		yes|up	1
ENSRNOG00000018082	Slc26a2	solute carrier family 26 member 2 [Source:RGD Symbol;Acc:620622]	yes|up	1
ENSRNOG00000048468	Trbv1	T cell receptor beta, variable 1 [Source:MGI Symbol;Acc:MGI:98594]	yes|down	1
ENSRNOG00000011161	Slc2a12	solute carrier family 2 member 12 [Source:RGD Symbol;Acc:1310175]	yes|up	1
ENSRNOG00000032178	Cenpa	centromere protein A [Source:RGD Symbol;Acc:1563607]	yes|down	1
ENSRNOG00000023870	Sh2d7	SH2 domain containing 7 [Source:RGD Symbol;Acc:1309791]	yes|up	1
ENSRNOG00000011000	Rims1	regulating synaptic membrane exocytosis 1 [Source:RGD Symbol;Acc:620000]	yes|up	1
ENSRNOG00000016420	Serpinb6b	serine (or cysteine) peptidase inhibitor, clade B, member 6b [Source:RGD Symbol;Acc:1310452]	yes|down	1
ENSRNOG00000020679	Icam1	intercellular adhesion molecule 1 [Source:RGD Symbol;Acc:2857]	yes|down	1
ENSRNOG00000059001	AABR07017737.1		yes|down	1
ENSRNOG00000059007	AABR07061005.2		yes|up	1
ENSRNOG00000033815	AC142181.1		yes|down	1
ENSRNOG00000019043	NEWGENE_1311658	programmed cell death 1 [Source:RGD Symbol;Acc:9464499]	yes|down	1
ENSRNOG00000045908	AABR07044416.1		yes|down	1
ENSRNOG00000042309	Kiaa0408L	Kiaa0408-like [Source:RGD Symbol;Acc:1307525]	yes|up	1
ENSRNOG00000023476	Slc16a5	solute carrier family 16 member 5 [Source:RGD Symbol;Acc:1582896]	yes|up	1
ENSRNOG00000005872	Tcf7	transcription factor 7 [Source:RGD Symbol;Acc:1305894]	yes|down	1
ENSRNOG00000059073	Slamf1	signaling lymphocytic activation molecule family member 1 [Source:RGD Symbol;Acc:1560634]	yes|down	1
ENSRNOG00000023576	RGD1305645	similar to RIKEN cDNA 1500015O10 [Source:RGD Symbol;Acc:1305645]	yes|up	1
ENSRNOG00000056721	Fancm	FA complementation group M [Source:RGD Symbol;Acc:1307897]	yes|down	1
ENSRNOG00000026053	Grem1	gremlin 1, DAN family BMP antagonist [Source:RGD Symbol;Acc:2359]	yes|down	1
ENSRNOG00000022499	Sgo1	shugoshin 1 [Source:RGD Symbol;Acc:1593238]	yes|down	1
ENSRNOG00000014375	Adgrb2	adhesion G protein-coupled receptor B2 [Source:RGD Symbol;Acc:1309431]	yes|up	1
ENSRNOG00000005871	Il1rn	interleukin 1 receptor antagonist [Source:RGD Symbol;Acc:621159]	yes|down	1
ENSRNOG00000061544	Spock2	SPARC/osteonectin, cwcv and kazal like domains proteoglycan 2 [Source:RGD Symbol;Acc:1308568]	yes|up	1
ENSRNOG00000043098	Mt2A	metallothionein 2A [Source:RGD Symbol;Acc:1592345]	yes|up	1
ENSRNOG00000024882	Pax1	paired box 1 [Source:RGD Symbol;Acc:1588548]	yes|down	1
ENSRNOG00000003515	Ephx1	epoxide hydrolase 1 [Source:RGD Symbol;Acc:2557]	yes|up	1
ENSRNOG00000052981	AABR07058464.1		yes|up	1
ENSRNOG00000012061	Prkcb	protein kinase C, beta [Source:RGD Symbol;Acc:3396]	yes|down	1
ENSRNOG00000038835	Cd86	CD86 molecule [Source:RGD Symbol;Acc:628714]	yes|down	1
ENSRNOG00000018740	Ugt1a3	UDP glycosyltransferase 1 family, polypeptide A3 [Source:RGD Symbol;Acc:1549728]	yes|up	1
ENSRNOG00000043486	Tnfrsf26	tumor necrosis factor receptor superfamily, member 26 [Source:RGD Symbol;Acc:1309693]	yes|down	1
ENSRNOG00000013520	Mat2a	methionine adenosyltransferase 2A [Source:RGD Symbol;Acc:619985]	yes|up	1
ENSRNOG00000033256	LOC691141	hypothetical protein LOC691141 [Source:RGD Symbol;Acc:1587445]	yes|down	1
ENSRNOG00000019342	Sult1a1	sulfotransferase family 1A member 1 [Source:RGD Symbol;Acc:3767]	yes|up	1
ENSRNOG00000019598	Vegfa	vascular endothelial growth factor A [Source:RGD Symbol;Acc:619991]	yes|up	1
ENSRNOG00000016525	Susd3	sushi domain containing 3 [Source:RGD Symbol;Acc:1310933]	yes|down	1
ENSRNOG00000012843	Aspg	asparaginase [Source:RGD Symbol;Acc:708388]	yes|up	1
ENSRNOG00000022225	Lrrc19	leucine rich repeat containing 19 [Source:RGD Symbol;Acc:1591722]	yes|up	1
ENSRNOG00000017833	Actn2	actinin alpha 2 [Source:RGD Symbol;Acc:1308097]	yes|up	1
ENSRNOG00000004873	Prkch	protein kinase C, eta [Source:RGD Symbol;Acc:621888]	yes|down	1
ENSRNOG00000016595	Hhex	hematopoietically expressed homeobox [Source:RGD Symbol;Acc:619932]	yes|down	1
ENSRNOG00000048166	Arhgap19	Rho GTPase activating protein 19 [Source:RGD Symbol;Acc:1593044]	yes|down	1
ENSRNOG00000048161	Tlr9	toll-like receptor 9 [Source:RGD Symbol;Acc:631352]	yes|down	1
ENSRNOG00000019681	Pold1	DNA polymerase delta 1, catalytic subunit [Source:RGD Symbol;Acc:621839]	yes|down	1
ENSRNOG00000058824	AABR07065789.3		yes|down	1
ENSRNOG00000040350	Mir675	microRNA 675 [Source:RGD Symbol;Acc:2314883]	yes|down	1
ENSRNOG00000024785	Mcpt4	mast cell protease 4 [Source:RGD Symbol;Acc:3064]	yes|up	1
ENSRNOG00000002776	Sell	selectin L [Source:RGD Symbol;Acc:3655]	yes|down	1
ENSRNOG00000001854	Tmtc1	transmembrane and tetratricopeptide repeat containing 1 [Source:RGD Symbol;Acc:1564868]	yes|up	1
ENSRNOG00000019296	Gnat2	G protein subunit alpha transducin 2 [Source:RGD Symbol;Acc:1309514]	yes|down	1
ENSRNOG00000015156	Gal	galanin and GMAP prepropeptide [Source:RGD Symbol;Acc:61954]	yes|up	1
ENSRNOG00000002773	Rgs4	regulator of G-protein signaling 4 [Source:RGD Symbol;Acc:3567]	yes|up	1
ENSRNOG00000046921	AABR07034986.2		yes|up	1
ENSRNOG00000001859	Sdf2l1	stromal cell-derived factor 2-like 1 [Source:RGD Symbol;Acc:1585844]	yes|down	1
ENSRNOG00000015093	Sparcl1	SPARC like 1 [Source:RGD Symbol;Acc:2531]	yes|up	1
ENSRNOG00000000502	Def6	DEF6 guanine nucleotide exchange factor [Source:RGD Symbol;Acc:1307945]	yes|down	1
ENSRNOG00000061531	Hoxa11	homeobox A11 [Source:RGD Symbol;Acc:1564605]	yes|up	1
ENSRNOG00000029212	Vcan	versican [Source:RGD Symbol;Acc:619940]	yes|down	1
ENSRNOG00000012208	Itgb7	integrin subunit beta 7 [Source:RGD Symbol;Acc:2929]	yes|down	1
ENSRNOG00000011907	Krt23	keratin 23 [Source:RGD Symbol;Acc:1308838]	yes|up	1
ENSRNOG00000019428	Higd1a	HIG1 hypoxia inducible domain family, member 1A [Source:RGD Symbol;Acc:620215]	yes|up	1
ENSRNOG00000038948	Stab2	stabilin 2 [Source:RGD Symbol;Acc:628822]	yes|down	1
ENSRNOG00000003028	Dnah17	dynein, axonemal, heavy chain 17 [Source:RGD Symbol;Acc:1563805]	yes|down	1
ENSRNOG00000028266	Lrrc55	leucine rich repeat containing 55 [Source:RGD Symbol;Acc:1561726]	yes|up	1
ENSRNOG00000021234	Slc4a11	solute carrier family 4 member 11 [Source:RGD Symbol;Acc:1310188]	yes|down	1
ENSRNOG00000052695	LOC102549869	uncharacterized LOC102549869 [Source:RGD Symbol;Acc:7702167]	yes|down	1
ENSRNOG00000047349	AABR07006269.1		yes|down	1
ENSRNOG00000014902	Stx11	syntaxin 11 [Source:RGD Symbol;Acc:1304744]	yes|down	1
ENSRNOG00000050024	Ms4a4a	membrane spanning 4-domains A4A [Source:RGD Symbol;Acc:1307006]	yes|down	1
ENSRNOG00000023614	Hsh2d	hematopoietic SH2 domain containing [Source:RGD Symbol;Acc:2321939]	yes|down	1
ENSRNOG00000024210	Nlrc3	NLR family, CARD domain containing 3 [Source:RGD Symbol;Acc:1304902]	yes|down	1
ENSRNOG00000047505	Tubb4a	tubulin, beta 4A class IVa [Source:RGD Symbol;Acc:619730]	yes|up	1
ENSRNOG00000000373	AABR07044900.1		yes|up	1
ENSRNOG00000012924	Nemp2	nuclear envelope integral membrane protein 2 [Source:RGD Symbol;Acc:1560421]	yes|down	1
ENSRNOG00000047503	Apoc3	apolipoprotein C3 [Source:RGD Symbol;Acc:2136]	yes|up	1
ENSRNOG00000021903	Atad5	ATPase family, AAA domain containing 5 [Source:RGD Symbol;Acc:1561464]	yes|down	1
ENSRNOG00000032703	Rasgrp3	RAS guanyl releasing protein 3 [Source:RGD Symbol;Acc:1304612]	yes|down	1
ENSRNOG00000042286	Nsl1	NSL1, MIS12 kinetochore complex component [Source:RGD Symbol;Acc:1562052]	yes|down	1
ENSRNOG00000033658	Kntc1	kinetochore associated 1 [Source:RGD Symbol;Acc:1307905]	yes|down	1
ENSRNOG00000008680	Loxl1	lysyl oxidase-like 1 [Source:RGD Symbol;Acc:1308752]	yes|down	1
ENSRNOG00000046324	AABR07051726.1		yes|down	1
ENSRNOG00000052064	Parvg	parvin, gamma [Source:RGD Symbol;Acc:1597417]	yes|down	1
ENSRNOG00000012197	Bpifb2	BPI fold containing family B, member 2 [Source:RGD Symbol;Acc:1310866]	yes|up	1
ENSRNOG00000002345	Rasgef1b	RasGEF domain family, member 1B [Source:RGD Symbol;Acc:1562220]	yes|up	1
ENSRNOG00000007350	Rac2	Rac family small GTPase 2 [Source:RGD Symbol;Acc:1307568]	yes|down	1
ENSRNOG00000047741	E2f2	E2F transcription factor 2 [Source:RGD Symbol;Acc:1593939]	yes|down	1
ENSRNOG00000007989	Chst1	carbohydrate sulfotransferase 1 [Source:RGD Symbol;Acc:1308142]	yes|down	1
ENSRNOG00000007456	Calb1	calbindin 1 [Source:RGD Symbol;Acc:69340]	yes|up	1
ENSRNOG00000007457	Serping1	serpin family G member 1 [Source:RGD Symbol;Acc:735225]	yes|down	1
ENSRNOG00000007981	Klhl23	kelch-like family member 23 [Source:RGD Symbol;Acc:1307166]	yes|up	1
ENSRNOG00000024264	Amz1	archaelysin family metallopeptidase 1 [Source:RGD Symbol;Acc:1311314]	yes|down	1
ENSRNOG00000006698	Rab33a	RAB33A, member RAS oncogene family [Source:RGD Symbol;Acc:1563280]	yes|down	1
ENSRNOG00000055499	Grid1	glutamate ionotropic receptor delta type subunit 1 [Source:RGD Symbol;Acc:68366]	yes|up	1
ENSRNOG00000024452	Carmil2	capping protein regulator and myosin 1 linker 2 [Source:RGD Symbol;Acc:1562390]	yes|down	1
ENSRNOG00000039494	Aass	aminoadipate-semialdehyde synthase [Source:RGD Symbol;Acc:1310811]	yes|up	1
ENSRNOG00000013484	Gsta1	glutathione S-transferase alpha 1 [Source:RGD Symbol;Acc:2753]	yes|up	1
ENSRNOG00000013954	Alpl	alkaline phosphatase, biomineralization associated [Source:RGD Symbol;Acc:2100]	yes|down	1
ENSRNOG00000020113	Cnnm2	cyclin and CBS domain divalent metal cation transport mediator 2 [Source:RGD Symbol;Acc:1308162]	yes|up	1
ENSRNOG00000013529	Stk4	serine/threonine kinase 4 [Source:RGD Symbol;Acc:1312035]	yes|down	1
ENSRNOG00000006108	Gngt2	G protein subunit gamma transducin 2 [Source:RGD Symbol;Acc:1591007]	yes|down	1
ENSRNOG00000006198	Prr11	proline rich 11 [Source:RGD Symbol;Acc:1561541]	yes|down	1
ENSRNOG00000046744	Ankrd29	ankyrin repeat domain 29 [Source:RGD Symbol;Acc:1587260]	yes|up	1
ENSRNOG00000046196	Icos	inducible T-cell co-stimulator [Source:RGD Symbol;Acc:620123]	yes|down	1
ENSRNOG00000046197	AABR07017658.1		yes|down	1
ENSRNOG00000013148	Rad54l	RAD54 like [Source:RGD Symbol;Acc:1310600]	yes|down	1
ENSRNOG00000029366	Prrt2	proline-rich transmembrane protein 2 [Source:RGD Symbol;Acc:1564195]	yes|up	1
ENSRNOG00000003298	Cd247	Cd247 molecule [Source:RGD Symbol;Acc:2305]	yes|down	1
ENSRNOG00000002582	Hand1	heart and neural crest derivatives expressed 1 [Source:RGD Symbol;Acc:621206]	yes|up	1
ENSRNOG00000042758	Tmem243	transmembrane protein 243 [Source:RGD Symbol;Acc:1562351]	yes|down	1
ENSRNOG00000003296	Dck	deoxycytidine kinase [Source:RGD Symbol;Acc:620667]	yes|down	1
ENSRNOG00000011971	C1s	complement C1s [Source:RGD Symbol;Acc:619983]	yes|down	1
ENSRNOG00000013552	Scd	stearoyl-CoA desaturase [Source:RGD Symbol;Acc:621176]	yes|down	1
ENSRNOG00000038129	Defb52	defensin beta 52 [Source:RGD Symbol;Acc:1565394]	yes|down	1
ENSRNOG00000006170	Bach2	BTB domain and CNC homolog 2 [Source:RGD Symbol;Acc:1562865]	yes|down	1
ENSRNOG00000013003	Srms	src-related kinase lacking C-terminal regulatory tyrosine and N-terminal myristylation sites [Source:RGD Symbol;Acc:1306602]	yes|down	1
ENSRNOG00000038047	Mt1	metallothionein 1 [Source:RGD Symbol;Acc:3117]	yes|up	1
ENSRNOG00000021168	Anp32e	acidic nuclear phosphoprotein 32 family member E [Source:RGD Symbol;Acc:1310611]	yes|down	1
ENSRNOG00000021510	Tbc1d10c	TBC1 domain family, member 10C [Source:RGD Symbol;Acc:1311490]	yes|down	1
ENSRNOG00000024569	Gimap9	GTPase, IMAP family member 9 [Source:RGD Symbol;Acc:1549762]	yes|down	1
ENSRNOG00000001374	Rasal1	RAS protein activator like 1 [Source:RGD Symbol;Acc:1311820]	yes|down	1
ENSRNOG00000021161	Fermt3	fermitin family member 3 [Source:RGD Symbol;Acc:1310168]	yes|down	1
ENSRNOG00000024365	Ect2	epithelial cell transforming 2 [Source:RGD Symbol;Acc:1308524]	yes|down	1
ENSRNOG00000020743	Cyp2s1	cytochrome P450, family 2, subfamily s, polypeptide 1 [Source:RGD Symbol;Acc:1306078]	yes|down	1
ENSRNOG00000005008	Angpt4	angiopoietin 4 [Source:RGD Symbol;Acc:1307539]	yes|down	1
ENSRNOG00000056069	Kif11	kinesin family member 11 [Source:RGD Symbol;Acc:621258]	yes|down	1
ENSRNOG00000020805	Sost	sclerostin [Source:RGD Symbol;Acc:69358]	yes|down	1
ENSRNOG00000019687	Art2b	ADP-ribosyltransferase 2b [Source:RGD Symbol;Acc:3521]	yes|down	1
ENSRNOG00000056400	Hhipl2	HHIP like 2 [Source:RGD Symbol;Acc:1311317]	yes|down	1
ENSRNOG00000001770	Ehhadh	enoyl-CoA hydratase and 3-hydroxyacyl CoA dehydrogenase [Source:RGD Symbol;Acc:621441]	yes|up	1
ENSRNOG00000036942	Tnfrsf9	TNF receptor superfamily member 9 [Source:RGD Symbol;Acc:1598208]	yes|down	1
ENSRNOG00000003207	Fmnl1	formin-like 1 [Source:RGD Symbol;Acc:1311042]	yes|down	1
ENSRNOG00000056565	AABR07059002.1		yes|up	1
ENSRNOG00000053047	Top2a	DNA topoisomerase II alpha [Source:RGD Symbol;Acc:62048]	yes|down	1
ENSRNOG00000012430	Cxcr5	C-X-C motif chemokine receptor 5 [Source:RGD Symbol;Acc:62010]	yes|down	1
ENSRNOG00000006588	Meox2	mesenchyme homeobox 2 [Source:RGD Symbol;Acc:3079]	yes|down	1
ENSRNOG00000039464	Tmem229a	transmembrane protein 229A [Source:RGD Symbol;Acc:1590212]	yes|up	1
ENSRNOG00000012439	Bid	BH3 interacting domain death agonist [Source:RGD Symbol;Acc:620160]	yes|down	1
ENSRNOG00000001457	Rfc2	replication factor C subunit 2 [Source:RGD Symbol;Acc:621198]	yes|down	1
ENSRNOG00000061862	Zbtb10	zinc finger and BTB domain containing 10 [Source:RGD Symbol;Acc:708377]	yes|up	1
ENSRNOG00000056585	Fscn1	fascin actin-bundling protein 1 [Source:MGI Symbol;Acc:MGI:1352745]	yes|down	1
ENSRNOG00000001514	Cdca7	cell division cycle associated 7 [Source:RGD Symbol;Acc:1309363]	yes|down	1
ENSRNOG00000027466	Cd27	CD27 molecule [Source:RGD Symbol;Acc:1560499]	yes|down	1
ENSRNOG00000009559	LOC103689974	tumor necrosis factor ligand superfamily member 11 [Source:RGD Symbol;Acc:9144322]	yes|down	1
ENSRNOG00000020245	Syt8	synaptotagmin 8 [Source:RGD Symbol;Acc:68399]	yes|down	1
ENSRNOG00000020246	Myl9	myosin light chain 9 [Source:RGD Symbol;Acc:1311235]	yes|up	1
ENSRNOG00000005670	Art4	ADP-ribosyltransferase 4 [Source:RGD Symbol;Acc:1306456]	yes|down	1
ENSRNOG00000001296	P2rx7	purinergic receptor P2X 7 [Source:RGD Symbol;Acc:3241]	yes|up	1
ENSRNOG00000057214	AABR07043510.1		yes|up	1
ENSRNOG00000020465	Ripk3	receptor-interacting serine-threonine kinase 3 [Source:RGD Symbol;Acc:628899]	yes|down	1
ENSRNOG00000053291	AABR07000493.1		yes|down	1
ENSRNOG00000002164	Nmu	neuromedin U [Source:RGD Symbol;Acc:68388]	yes|up	1
ENSRNOG00000030759	Nhs	NHS actin remodeling regulator [Source:RGD Symbol;Acc:1561818]	yes|up	1
ENSRNOG00000000854	Ncr3	natural cytotoxicity triggering receptor 3 [Source:RGD Symbol;Acc:727881]	yes|down	1
ENSRNOG00000047836	RGD1565617	similar to Ig variable region, light chain [Source:RGD Symbol;Acc:1565617]	yes|up	1
ENSRNOG00000027811	Lilrb4	leukocyte immunoglobulin like receptor B4 [Source:RGD Symbol;Acc:1359090]	yes|down	1
ENSRNOG00000014476	Evl	Enah/Vasp-like [Source:RGD Symbol;Acc:621150]	yes|down	1
ENSRNOG00000057696	Sbk1	SH3 domain binding kinase 1 [Source:RGD Symbol;Acc:628713]	yes|down	1
ENSRNOG00000054801	AABR07057997.1		yes|up	1
ENSRNOG00000014471	B3gnt6	UDP-GlcNAc:betaGal beta-1,3-N-acetylglucosaminyltransferase 6 [Source:RGD Symbol;Acc:1310926]	yes|up	1
ENSRNOG00000058739	Snn	stannin [Source:RGD Symbol;Acc:3730]	yes|down	1
ENSRNOG00000042524	AABR07030590.1	mast cell immunoglobulin-like receptor 1 [Source:NCBI gene;Acc:59105]	yes|down	1
ENSRNOG00000018804	Ripor2	RHO family interacting cell polarization regulator 2 [Source:RGD Symbol;Acc:1306939]	yes|down	1
ENSRNOG00000050625	LOC100911217	adipogenin-like [Source:RGD Symbol;Acc:6494393]	yes|up	1
ENSRNOG00000006911	Sptb	spectrin, beta, erythrocytic [Source:RGD Symbol;Acc:1303243]	yes|up	1
ENSRNOG00000005214	Plek	pleckstrin [Source:RGD Symbol;Acc:1308269]	yes|down	1
ENSRNOG00000027606	Neurl1b	neuralized E3 ubiquitin protein ligase 1B [Source:RGD Symbol;Acc:1564984]	yes|up	1
ENSRNOG00000017485	Cd72	Cd72 molecule [Source:RGD Symbol;Acc:1309757]	yes|down	1
ENSRNOG00000020484	Trpm5	transient receptor potential cation channel, subfamily M, member 5 [Source:RGD Symbol;Acc:1310620]	yes|up	1
ENSRNOG00000000185	Mpst	mercaptopyruvate sulfurtransferase [Source:RGD Symbol;Acc:620065]	yes|up	1
ENSRNOG00000000187	Csf2rb	colony stimulating factor 2 receptor beta common subunit [Source:RGD Symbol;Acc:620189]	yes|down	1
ENSRNOG00000000186	Tst	thiosulfate sulfurtransferase [Source:RGD Symbol;Acc:3913]	yes|up	1
ENSRNOG00000053811	Arg2	arginase 2 [Source:RGD Symbol;Acc:2151]	yes|up	1
ENSRNOG00000057851	LOC680254	hypothetical protein LOC680254 [Source:RGD Symbol;Acc:1594177]	yes|down	1
ENSRNOG00000052873	Npnt	nephronectin [Source:NCBI gene;Acc:686753]	yes|up	1
ENSRNOG00000037839	P2ry10	P2Y receptor family member 10 [Source:RGD Symbol;Acc:1561912]	yes|down	1
ENSRNOG00000037838	RGD1560455	similar to RIKEN cDNA A630033H20 gene [Source:RGD Symbol;Acc:1560455]	yes|down	1
ENSRNOG00000002014	Stap1	signal transducing adaptor family member 1 [Source:RGD Symbol;Acc:1311584]	yes|down	1
ENSRNOG00000027691	Cldn17	claudin 17 [Source:RGD Symbol;Acc:1307462]	yes|up	1
ENSRNOG00000056714	Sla	src-like adaptor [Source:RGD Symbol;Acc:631373]	yes|down	1
ENSRNOG00000026060	Arsi	arylsulfatase family, member I [Source:RGD Symbol;Acc:1310242]	yes|down	1
ENSRNOG00000020644	Nsg2	neuronal vesicle trafficking associated 2 [Source:RGD Symbol;Acc:1563944]	yes|up	1
ENSRNOG00000061813	Ly6c	Ly6-C antigen [Source:RGD Symbol;Acc:621266]	yes|down	1
ENSRNOG00000037339	Siglec10	sialic acid binding Ig-like lectin 10 [Source:RGD Symbol;Acc:1307441]	yes|down	1
ENSRNOG00000056219	Olr1	oxidized low density lipoprotein receptor 1 [Source:RGD Symbol;Acc:620515]	yes|down	1
ENSRNOG00000028677	LOC361346	similar to chromosome 18 open reading frame 54 [Source:RGD Symbol;Acc:1563837]	yes|down	1
ENSRNOG00000039656	Abca17	ATP-binding cassette, subfamily A (ABC1), member 17 [Source:RGD Symbol;Acc:1560494]	yes|down	1
ENSRNOG00000000137	Ly86	lymphocyte antigen 86 [Source:RGD Symbol;Acc:1309936]	yes|down	1
ENSRNOG00000009074	AABR07017902.1		yes|down	1
ENSRNOG00000054437	Rel	REL proto-oncogene, NF-kB subunit [Source:RGD Symbol;Acc:1311231]	yes|down	1
ENSRNOG00000031398	Mab21l2	mab-21 like 2 [Source:RGD Symbol;Acc:1595520]	yes|up	1
ENSRNOG00000019128	St8sia4	ST8 alpha-N-acetyl-neuraminide alpha-2,8-sialyltransferase 4 [Source:RGD Symbol;Acc:621845]	yes|down	1
ENSRNOG00000019482	Gnao1	G protein subunit alpha o1 [Source:RGD Symbol;Acc:628732]	yes|up	1
ENSRNOG00000054024	AC098750.2		yes|up	1
ENSRNOG00000004921	Nusap1	nucleolar and spindle associated protein 1 [Source:RGD Symbol;Acc:1305764]	yes|down	1
ENSRNOG00000021303	Drc3	dynein regulatory complex subunit 3 [Source:RGD Symbol;Acc:1309150]	yes|up	1
ENSRNOG00000010208	Timp1	TIMP metallopeptidase inhibitor 1 [Source:RGD Symbol;Acc:621675]	yes|down	1
ENSRNOG00000024899	Cxcl13	C-X-C motif chemokine ligand 13 [Source:RGD Symbol;Acc:1564256]	yes|down	1
ENSRNOG00000010111	Exoc3l4	exocyst complex component 3-like 4 [Source:RGD Symbol;Acc:1307749]	yes|down	1
ENSRNOG00000019481	Cyp8b1	cytochrome P450 family 8 subfamily B member 1 [Source:RGD Symbol;Acc:71016]	yes|up	1
ENSRNOG00000060963	Rbmy1j	RNA binding motif protein, Y-linked, family 1, member J [Source:RGD Symbol;Acc:9125062]	yes|up	1
ENSRNOG00000058568	Dhrs9	dehydrogenase/reductase 9 [Source:RGD Symbol;Acc:620655]	yes|up	1
ENSRNOG00000016826	Pla2g2d	phospholipase A2, group IID [Source:RGD Symbol;Acc:1309862]	yes|down	1
ENSRNOG00000049700	LOC100909857	cytidine deaminase-like [Source:RGD Symbol;Acc:6501229]	yes|up	1
ENSRNOG00000036685	Npb	neuropeptide B [Source:RGD Symbol;Acc:708513]	yes|down	1
ENSRNOG00000062252	AABR07072853.4		yes|up	1
ENSRNOG00000032844	RT1-Da	RT1 class II, locus Da [Source:RGD Symbol;Acc:1593283]	yes|down	1
ENSRNOG00000018938	Mkx	mohawk homeobox [Source:RGD Symbol;Acc:1305652]	yes|up	1
ENSRNOG00000014685	Nlrp6	NLR family, pyrin domain containing 6 [Source:RGD Symbol;Acc:708549]	yes|up	1
ENSRNOG00000008115	Arhgap11a	Rho GTPase activating protein 11A [Source:RGD Symbol;Acc:1309107]	yes|down	1
ENSRNOG00000061608	Hoxa3	homeobox A3 [Source:RGD Symbol;Acc:1561431]	yes|up	1
ENSRNOG00000006867	Etv1	ets variant 1 [Source:RGD Symbol;Acc:1312007]	yes|up	1
ENSRNOG00000006860	Itk	IL2-inducible T-cell kinase [Source:RGD Symbol;Acc:1311618]	yes|down	1
ENSRNOG00000055995	AABR07021213.1		yes|down	1
ENSRNOG00000049096	Mcpt8l2	mast cell protease 8-like 2 [Source:RGD Symbol;Acc:1302938]	yes|up	1
ENSRNOG00000010378	Slc4a5	solute carrier family 4 member 5 [Source:RGD Symbol;Acc:1303009]	yes|down	1
ENSRNOG00000059479	Adcy1	adenylate cyclase 1 [Source:RGD Symbol;Acc:1309318]	yes|up	1
ENSRNOG00000047920	AABR07061078.1		yes|down	1
ENSRNOG00000020150	Il18bp	interleukin 18 binding protein [Source:RGD Symbol;Acc:620042]	yes|down	1
ENSRNOG00000011672	Tph1	tryptophan hydroxylase 1 [Source:RGD Symbol;Acc:3895]	yes|up	1
ENSRNOG00000004409	Sash3	SAM and SH3 domain containing 3 [Source:RGD Symbol;Acc:1560293]	yes|down	1
ENSRNOG00000015821	Cd2	Cd2 molecule [Source:RGD Symbol;Acc:2297]	yes|down	1
ENSRNOG00000052407	Btk	Bruton tyrosine kinase [Source:RGD Symbol;Acc:1359683]	yes|down	1
ENSRNOG00000011475	Srcin1	SRC kinase signaling inhibitor 1 [Source:RGD Symbol;Acc:708439]	yes|down	1
ENSRNOG00000002866	Rassf6	Ras association domain family member 6 [Source:RGD Symbol;Acc:1566082]	yes|up	1
ENSRNOG00000058361	AABR07073391.1		yes|down	1
ENSRNOG00000062170	AABR07058158.1		yes|down	1
ENSRNOG00000018327	Fank1	fibronectin type III and ankyrin repeat domains 1 [Source:RGD Symbol;Acc:1304756]	yes|up	1
ENSRNOG00000023262	Cenpm	centromere protein M [Source:RGD Symbol;Acc:1307309]	yes|down	1
ENSRNOG00000027035	Sgo2	shugoshin 2 [Source:RGD Symbol;Acc:1308450]	yes|down	1
ENSRNOG00000061070	Irf4	interferon regulatory factor 4 [Source:RGD Symbol;Acc:1308050]	yes|down	1
ENSRNOG00000004854	Has2	hyaluronan synthase 2 [Source:RGD Symbol;Acc:2781]	yes|down	1
ENSRNOG00000017510	Mfge8	milk fat globule-EGF factor 8 protein [Source:RGD Symbol;Acc:3083]	yes|down	1
ENSRNOG00000015567	Slc9a2	solute carrier family 9 member A2 [Source:RGD Symbol;Acc:3719]	yes|up	1
ENSRNOG00000011151	Tenm4	teneurin transmembrane protein 4 [Source:RGD Symbol;Acc:1304658]	yes|up	1
ENSRNOG00000060782	Nkx3-2	NK3 homeobox 2 [Source:RGD Symbol;Acc:1584617]	yes|up	1
ENSRNOG00000055271	AABR07043190.1		yes|up	1
ENSRNOG00000043124	Cckar	cholecystokinin A receptor [Source:RGD Symbol;Acc:2289]	yes|up	1
ENSRNOG00000026039	Tspan32	tetraspanin 32 [Source:RGD Symbol;Acc:1308721]	yes|down	1
ENSRNOG00000016728	Tiam2	T-cell lymphoma invasion and metastasis 2 [Source:RGD Symbol;Acc:2324148]	yes|up	1
ENSRNOG00000019195	Polh	DNA polymerase eta [Source:RGD Symbol;Acc:1309893]	yes|down	1
ENSRNOG00000052574	AABR07021955.1		yes|down	1
ENSRNOG00000019050	Ifit1	interferon-induced protein with tetratricopeptide repeats 1 [Source:RGD Symbol;Acc:620599]	yes|up	1
ENSRNOG00000058006	Sncg	synuclein, gamma [Source:RGD Symbol;Acc:70996]	yes|up	1
ENSRNOG00000008180	Lyn	LYN proto-oncogene, Src family tyrosine kinase [Source:RGD Symbol;Acc:621017]	yes|down	1
ENSRNOG00000019057	Prkcq	protein kinase C, theta [Source:RGD Symbol;Acc:620968]	yes|down	1
ENSRNOG00000016999	Grp	gastrin releasing peptide [Source:RGD Symbol;Acc:621740]	yes|up	1
ENSRNOG00000019120	Hmgcs2	3-hydroxy-3-methylglutaryl-CoA synthase 2 [Source:RGD Symbol;Acc:2804]	yes|up	1
ENSRNOG00000052979	Rab17	RAB17, member RAS oncogene family [Source:RGD Symbol;Acc:1562478]	yes|up	1
ENSRNOG00000016753	Slc14a1	solute carrier family 14 member 1 [Source:RGD Symbol;Acc:3688]	yes|down	1
ENSRNOG00000026108	Tcof1	treacle ribosome biogenesis factor 1 [Source:RGD Symbol;Acc:1309850]	yes|down	1
ENSRNOG00000022505	Slc17a4	solute carrier family 17, member 4 [Source:RGD Symbol;Acc:1584758]	yes|up	1
ENSRNOG00000004322	Sh3kbp1	SH3 domain-containing kinase-binding protein 1 [Source:RGD Symbol;Acc:620904]	yes|down	1
ENSRNOG00000047647	Il2ra	interleukin 2 receptor subunit alpha [Source:RGD Symbol;Acc:2895]	yes|down	1
ENSRNOG00000033893	Cacna1h	calcium voltage-gated channel subunit alpha1 H [Source:RGD Symbol;Acc:68943]	yes|up	1
ENSRNOG00000008056	Ankrd9	ankyrin repeat domain 9 [Source:RGD Symbol;Acc:1307662]	yes|up	1
ENSRNOG00000008054	Igsf9	immunoglobulin superfamily, member 9 [Source:RGD Symbol;Acc:1304566]	yes|up	1
ENSRNOG00000004242	Pole2	DNA polymerase epsilon 2, accessory subunit [Source:RGD Symbol;Acc:1311962]	yes|down	1
ENSRNOG00000026791	Pgbd5	piggyBac transposable element derived 5 [Source:RGD Symbol;Acc:1310825]	yes|up	1
ENSRNOG00000018615	Cenph	centromere protein H [Source:RGD Symbol;Acc:1583506]	yes|down	1
ENSRNOG00000011702	Foxp3	forkhead box P3 [Source:RGD Symbol;Acc:1562112]	yes|down	1
ENSRNOG00000032247	Bank1	B-cell scaffold protein with ankyrin repeats 1 [Source:RGD Symbol;Acc:1564639]	yes|down	1
ENSRNOG00000003622	Cybb	cytochrome b-245 beta chain [Source:RGD Symbol;Acc:620574]	yes|down	1
ENSRNOG00000016437	Tm4sf4	transmembrane 4 L six family member 4 [Source:RGD Symbol;Acc:621784]	yes|up	1
ENSRNOG00000046858	MGC109340	similar to Microsomal signal peptidase 23 kDa subunit (SPase 22 kDa subunit) (SPC22/23) [Source:RGD Symbol;Acc:1563536]	yes|up	1
ENSRNOG00000012051	Ncaph	non-SMC condensin I complex, subunit H [Source:RGD Symbol;Acc:1596799]	yes|down	1
ENSRNOG00000052757	AABR07049695.3		yes|up	1
ENSRNOG00000016535	Ccl22	C-C motif chemokine ligand 22 [Source:RGD Symbol;Acc:619933]	yes|down	1
ENSRNOG00000018316	Grap2	GRB2-related adaptor protein 2 [Source:MGI Symbol;Acc:MGI:1333842]	yes|down	1
ENSRNOG00000017808	Klf15	Kruppel-like factor 15 [Source:RGD Symbol;Acc:70918]	yes|up	1
ENSRNOG00000012110	Col17a1	collagen type XVII alpha 1 chain [Source:RGD Symbol;Acc:1311130]	yes|down	1
ENSRNOG00000023633	Crabp1	cellular retinoic acid binding protein 1 [Source:RGD Symbol;Acc:2400]	yes|up	1
ENSRNOG00000017804	Sept1	septin 1 [Source:RGD Symbol;Acc:1307216]	yes|down	1
ENSRNOG00000060237	Inhbb	inhibin subunit beta B [Source:RGD Symbol;Acc:2913]	yes|down	1
ENSRNOG00000012835	Espl1	extra spindle pole bodies like 1, separase [Source:RGD Symbol;Acc:1306266]	yes|down	1
ENSRNOG00000012119	AABR07069282.1		yes|down	1
ENSRNOG00000017803	Apbb1ip	amyloid beta precursor protein binding family B member 1 interacting protein [Source:RGD Symbol;Acc:1304795]	yes|down	1
ENSRNOG00000008759	Csf3r	colony stimulating factor 3 receptor [Source:RGD Symbol;Acc:1309114]	yes|down	1
ENSRNOG00000014312	AC109737.1		yes|down	1
ENSRNOG00000014317	Arpc5l	actin related protein 2/3 complex, subunit 5-like [Source:RGD Symbol;Acc:1308867]	yes|down	1
ENSRNOG00000007030	Epha7	Eph receptor A7 [Source:RGD Symbol;Acc:70957]	yes|up	1
ENSRNOG00000048190	Rgmb	repulsive guidance molecule BMP co-receptor b [Source:RGD Symbol;Acc:1595392]	yes|up	1
ENSRNOG00000008755	Acox1	acyl-CoA oxidase 1 [Source:RGD Symbol;Acc:619757]	yes|up	1
ENSRNOG00000011490	Angptl8	angiopoietin-like 8 [Source:RGD Symbol;Acc:2320121]	yes|up	1
ENSRNOG00000001843	Bcl6	BCL6, transcription repressor [Source:RGD Symbol;Acc:1309345]	yes|down	1
ENSRNOG00000022480	Atp6v1g3	ATPase H+ transporting V1 subunit G3 [Source:RGD Symbol;Acc:1304635]	yes|down	1
ENSRNOG00000023993	Kif1a	kinesin family member 1A [Source:RGD Symbol;Acc:1304996]	yes|up	1
ENSRNOG00000038286	Slamf6	SLAM family member 6 [Source:RGD Symbol;Acc:1561848]	yes|down	1
ENSRNOG00000016543	Trim63	tripartite motif containing 63 [Source:RGD Symbol;Acc:619964]	yes|up	1
ENSRNOG00000017899	Akr7a3	aldo-keto reductase family 7 member A3 [Source:RGD Symbol;Acc:628635]	yes|up	1
ENSRNOG00000026252	E2f7	E2F transcription factor 7 [Source:RGD Symbol;Acc:1310258]	yes|down	1
ENSRNOG00000016547	Rgs19	regulator of G-protein signaling 19 [Source:RGD Symbol;Acc:629471]	yes|down	1
ENSRNOG00000003198	RGD1305733	similar to RIKEN cDNA 2900011O08 [Source:RGD Symbol;Acc:1305733]	yes|up	1
ENSRNOG00000045641	LOC691695	similar to granzyme C [Source:RGD Symbol;Acc:1597199]	yes|up	1
ENSRNOG00000003195	Caskin1	CASK interacting protein 1 [Source:RGD Symbol;Acc:620191]	yes|up	1
ENSRNOG00000034230	Fcrl1	Fc receptor-like 1 [Source:RGD Symbol;Acc:1589411]	yes|down	1
ENSRNOG00000014021	Matn4	matrilin 4 [Source:RGD Symbol;Acc:1309732]	yes|up	1
ENSRNOG00000012942	Satb1	SATB homeobox 1 [Source:RGD Symbol;Acc:1305561]	yes|down	1
ENSRNOG00000025354	Rinl	Ras and Rab interactor-like [Source:RGD Symbol;Acc:1310133]	yes|down	1
ENSRNOG00000060123	Kifc2	kinesin family member C2 [Source:RGD Symbol;Acc:735021]	yes|up	1
ENSRNOG00000013884	Psd3	pleckstrin and Sec7 domain containing 3 [Source:RGD Symbol;Acc:1559968]	yes|up	1
ENSRNOG00000021220	Cpxm1	carboxypeptidase X (M14 family), member 1 [Source:RGD Symbol;Acc:1306937]	yes|down	1
ENSRNOG00000013886	Fyb1	FYN binding protein 1 [Source:RGD Symbol;Acc:1563421]	yes|down	1
ENSRNOG00000007748	Tex15	testis expressed 15, meiosis and synapsis associated [Source:RGD Symbol;Acc:1311266]	yes|up	1
ENSRNOG00000019582	Mthfd1l	methylenetetrahydrofolate dehydrogenase (NADP+ dependent) 1-like [Source:RGD Symbol;Acc:1307311]	yes|down	1
ENSRNOG00000047450	Lmo3	LIM domain only 3 [Source:RGD Symbol;Acc:1561357]	yes|up	1
ENSRNOG00000015131	Ube2c	ubiquitin-conjugating enzyme E2C [Source:RGD Symbol;Acc:1305382]	yes|down	1
ENSRNOG00000012280	Ptx3	pentraxin 3 [Source:RGD Symbol;Acc:1593476]	yes|down	1
ENSRNOG00000012283	Chrna6	cholinergic receptor nicotinic alpha 6 subunit [Source:RGD Symbol;Acc:69281]	yes|up	1
ENSRNOG00000046981	Gp1bb	glycoprotein Ib platelet subunit beta [Source:RGD Symbol;Acc:621050]	yes|up	1
ENSRNOG00000046452	Fcgr2b	Fc fragment of IgG receptor IIb [Source:RGD Symbol;Acc:631331]	yes|down	1
ENSRNOG00000021856	Lat2	linker for activation of T cells family, member 2 [Source:RGD Symbol;Acc:631397]	yes|down	1
ENSRNOG00000055402	AABR07017634.1		yes|down	1
ENSRNOG00000021912	Gpr152	G protein-coupled receptor 152 [Source:RGD Symbol;Acc:1584082]	yes|down	1
ENSRNOG00000021916	Slc16a12	solute carrier family 16, member 12 [Source:RGD Symbol;Acc:1311468]	yes|up	1
ENSRNOG00000043344	Cyp4f40	cytochrome P450, family 4, subfamily f, polypeptide 40 [Source:RGD Symbol;Acc:1559596]	yes|up	1
ENSRNOG00000010224	Rab30	RAB30, member RAS oncogene family [Source:RGD Symbol;Acc:1309507]	yes|down	1
ENSRNOG00000031591	AABR07032255.2		yes|up	1
ENSRNOG00000043426	Kyat3	kynurenine aminotransferase 3 [Source:RGD Symbol;Acc:1359262]	yes|up	1
ENSRNOG00000000034	Nuak2	NUAK family kinase 2 [Source:RGD Symbol;Acc:1359167]	yes|up	1
ENSRNOG00000003283	Rcsd1	RCSD domain containing 1 [Source:RGD Symbol;Acc:1304715]	yes|down	1
ENSRNOG00000002471	Polq	DNA polymerase theta [Source:RGD Symbol;Acc:1309795]	yes|down	1
ENSRNOG00000003285	Mpv17l	MPV17 mitochondrial inner membrane protein like [Source:RGD Symbol;Acc:2324483]	yes|up	1
ENSRNOG00000022807	Pced1b	PC-esterase domain containing 1B [Source:RGD Symbol;Acc:1561028]	yes|down	1
ENSRNOG00000006663	Usp2	ubiquitin specific peptidase 2 [Source:RGD Symbol;Acc:621073]	yes|up	1
ENSRNOG00000014960	Bard1	BRCA1 associated RING domain 1 [Source:RGD Symbol;Acc:621072]	yes|down	1
ENSRNOG00000006661	Rad51c	RAD51 paralog C [Source:RGD Symbol;Acc:1563765]	yes|down	1
ENSRNOG00000021357	AC118772.2		yes|down	1
ENSRNOG00000013121	Mier3	MIER family member 3 [Source:RGD Symbol;Acc:1311241]	yes|up	1
ENSRNOG00000008450	LOC100359539	ribonucleotide reductase M2 polypeptide [Source:RGD Symbol;Acc:2323655]	yes|down	1
ENSRNOG00000025075	Relt	RELT, TNF receptor [Source:RGD Symbol;Acc:1305381]	yes|down	1
ENSRNOG00000046276	Myh3	myosin heavy chain 3 [Source:RGD Symbol;Acc:3138]	yes|down	1
ENSRNOG00000024077	Fbxo5	F-box protein 5 [Source:RGD Symbol;Acc:1309405]	yes|down	1
ENSRNOG00000020106	Tnfrsf4	TNF receptor superfamily member 4 [Source:RGD Symbol;Acc:3920]	yes|down	1
ENSRNOG00000013128	Tmem179	transmembrane protein 179 [Source:RGD Symbol;Acc:1310269]	yes|up	1
ENSRNOG00000002303	Kcnj12	potassium voltage-gated channel subfamily J member 12 [Source:RGD Symbol;Acc:621660]	yes|up	1
ENSRNOG00000006466	AABR07060585.1	homeobox protein Hox-A5 [Source:NCBI gene;Acc:103692127]	yes|up	1
ENSRNOG00000024671	Dmxl1	Dmx-like 1 [Source:RGD Symbol;Acc:1307692]	yes|down	1
ENSRNOG00000006263	Sh2d1a	SH2 domain containing 1A [Source:RGD Symbol;Acc:1562408]	yes|down	1
ENSRNOG00000000655	Ptprc	protein tyrosine phosphatase, receptor type, C [Source:RGD Symbol;Acc:3451]	yes|down	1
ENSRNOG00000043164	AABR07060353.2		yes|down	1
ENSRNOG00000010610	Hpgd	15-hydroxyprostaglandin dehydrogenase [Source:RGD Symbol;Acc:620087]	yes|up	1
ENSRNOG00000056273	AABR07051692.1		yes|down	1
ENSRNOG00000046181	Anks4b	ankyrin repeat and sterile alpha motif domain containing 4B [Source:RGD Symbol;Acc:1584204]	yes|up	1
ENSRNOG00000042748	AABR07073021.1		yes|up	1
ENSRNOG00000012735	Kif24	kinesin family member 24 [Source:RGD Symbol;Acc:1307723]	yes|down	1
ENSRNOG00000042747	Fam72a	family with sequence similarity 72, member A [Source:RGD Symbol;Acc:1598023]	yes|down	1
ENSRNOG00000038259	AABR07053749.1		yes|up	1
ENSRNOG00000052128	Clec2e	C-type lectin domain family 2, member E [Source:RGD Symbol;Acc:1587527]	yes|up	1
ENSRNOG00000001349	Mcm7	minichromosome maintenance complex component 7 [Source:RGD Symbol;Acc:1303018]	yes|down	1
ENSRNOG00000006167	Rasal3	RAS protein activator like 3 [Source:RGD Symbol;Acc:1309019]	yes|down	1
ENSRNOG00000021174	Macrod1	MACRO domain containing 1 [Source:RGD Symbol;Acc:628701]	yes|up	1
ENSRNOG00000024000	Cd22	CD22 molecule [Source:RGD Symbol;Acc:1311610]	yes|down	1
ENSRNOG00000014083	Iqsec3	IQ motif and Sec7 domain 3 [Source:RGD Symbol;Acc:1593191]	yes|up	1
ENSRNOG00000001692	Chaf1b	chromatin assembly factor 1 subunit B [Source:RGD Symbol;Acc:1307634]	yes|down	1
ENSRNOG00000056874	AABR07026565.1		yes|down	1
ENSRNOG00000001061	Rilpl2	Rab interacting lysosomal protein-like 2 [Source:RGD Symbol;Acc:1303140]	yes|down	1
ENSRNOG00000021685	Cdk5r1	cyclin-dependent kinase 5 regulatory subunit 1 [Source:RGD Symbol;Acc:629472]	yes|down	1
ENSRNOG00000046005	Scd2	stearoyl-Coenzyme A desaturase 2 [Source:RGD Symbol;Acc:621177]	yes|down	1
ENSRNOG00000020770	Arl4d	ADP-ribosylation factor like GTPase 4D [Source:RGD Symbol;Acc:1306875]	yes|up	1
ENSRNOG00000058666	AABR07043365.1		yes|up	1
ENSRNOG00000053026	Shcbp1	SHC binding and spindle associated 1 [Source:RGD Symbol;Acc:1590844]	yes|down	1
ENSRNOG00000056059	AABR07060352.2		yes|down	1
ENSRNOG00000053025	AC130391.3		yes|up	1
ENSRNOG00000003171	Mpz	myelin protein zero [Source:RGD Symbol;Acc:3109]	yes|down	1
ENSRNOG00000046076	Tspan10	tetraspanin 10 [Source:RGD Symbol;Acc:1590062]	yes|down	1
ENSRNOG00000056574	Tigit	T cell immunoreceptor with Ig and ITIM domains [Source:RGD Symbol;Acc:1563191]	yes|down	1
ENSRNOG00000053118	LOC103694867	ADP-ribosylation factor-binding protein GGA2-like [Source:RGD Symbol;Acc:9280434]	yes|down	1
ENSRNOG00000020884	Cd6	Cd6 molecule [Source:RGD Symbol;Acc:2312]	yes|down	1
ENSRNOG00000056290	AABR07061052.1		yes|down	1
ENSRNOG00000017146	Nfatc1	nuclear factor of activated T-cells 1 [Source:RGD Symbol;Acc:2319357]	yes|down	1
ENSRNOG00000051880	AABR07021996.1		yes|down	1
ENSRNOG00000012543	Mcm3	minichromosome maintenance complex component 3 [Source:RGD Symbol;Acc:1305168]	yes|down	1
ENSRNOG00000051885	LOC100911991	elongation factor 1-alpha 1-like [Source:RGD Symbol;Acc:6489209]	yes|down	1
ENSRNOG00000053339	AABR07062512.1		yes|down	1
ENSRNOG00000013269	Tnfsf10	TNF superfamily member 10 [Source:RGD Symbol;Acc:628734]	yes|up	1
ENSRNOG00000001115	Slc29a4	solute carrier family 29 member 4 [Source:RGD Symbol;Acc:1310545]	yes|up	1
ENSRNOG00000002045	Anxa3	annexin A3 [Source:RGD Symbol;Acc:2119]	yes|down	1
ENSRNOG00000000838	Lta	lymphotoxin alpha [Source:RGD Symbol;Acc:3020]	yes|down	1
ENSRNOG00000020254	Per2	period circadian regulator 2 [Source:RGD Symbol;Acc:61945]	yes|up	1
ENSRNOG00000050509	Ebi3	Epstein-Barr virus induced 3 [Source:RGD Symbol;Acc:1589467]	yes|down	1
ENSRNOG00000005669	Car8	carbonic anhydrase 8 [Source:RGD Symbol;Acc:1304709]	yes|up	1
ENSRNOG00000011498	Psip1	PC4 and SFRS1 interacting protein 1 [Source:RGD Symbol;Acc:631439]	yes|down	1
ENSRNOG00000009565	Pdk4	pyruvate dehydrogenase kinase 4 [Source:RGD Symbol;Acc:69061]	yes|up	1
ENSRNOG00000030431	RT1-Db2	RT1 class II, locus Db2 [Source:RGD Symbol;Acc:1595922]	yes|down	1
ENSRNOG00000005109	Rprm	reprimo, TP53 dependent G2 arrest mediator homolog [Source:RGD Symbol;Acc:1595512]	yes|up	1
ENSRNOG00000030724	Adamdec1	ADAM-like, decysin 1 [Source:RGD Symbol;Acc:1309861]	yes|up	1
ENSRNOG00000002397	Slc30a10	solute carrier family 30, member 10 [Source:RGD Symbol;Acc:1305098]	yes|up	1
ENSRNOG00000050430	Vav1	vav guanine nucleotide exchange factor 1 [Source:RGD Symbol;Acc:3951]	yes|down	1
ENSRNOG00000050431	Aspnl1	asporin-like 1 [Source:RGD Symbol;Acc:9278606]	yes|up	1
ENSRNOG00000030729	C4b	complement C4B (Chido blood group) [Source:RGD Symbol;Acc:1591983]	yes|down	1
ENSRNOG00000013309	Pik3ap1	phosphoinositide-3-kinase adaptor protein 1 [Source:RGD Symbol;Acc:1307744]	yes|down	1
ENSRNOG00000002153	Cep135	centrosomal protein 135 [Source:RGD Symbol;Acc:1310726]	yes|down	1
ENSRNOG00000015149	Nrg4	neuregulin 4 [Source:RGD Symbol;Acc:1589860]	yes|up	1
ENSRNOG00000013064	Lrp8	LDL receptor related protein 8 [Source:RGD Symbol;Acc:1305729]	yes|down	1
ENSRNOG00000028708	Ntsr1	neurotensin receptor 1 [Source:RGD Symbol;Acc:1306076]	yes|up	1
ENSRNOG00000013069	Sapcd2	suppressor APC domain containing 2 [Source:RGD Symbol;Acc:1590629]	yes|down	1
ENSRNOG00000029564	Trat1	T cell receptor associated transmembrane adaptor 1 [Source:RGD Symbol;Acc:1563011]	yes|down	1
ENSRNOG00000014464	Tnfsf13b	TNF superfamily member 13b [Source:RGD Symbol;Acc:1561519]	yes|down	1
ENSRNOG00000000885	Auts2	autism susceptibility candidate 2-like [Source:NCBI gene;Acc:100362819]	yes|up	1
ENSRNOG00000059975	AC124205.2		yes|up	1
ENSRNOG00000008323	Pitpnm3	PITPNM family member 3 [Source:RGD Symbol;Acc:1308200]	yes|up	1
ENSRNOG00000018830	Aff3	AF4/FMR2 family, member 3 [Source:RGD Symbol;Acc:1308527]	yes|down	1
ENSRNOG00000017496	Cnp	2',3'-cyclic nucleotide 3' phosphodiesterase [Source:RGD Symbol;Acc:2368]	yes|down	1
ENSRNOG00000001134	Rfc5	replication factor C subunit 5 [Source:RGD Symbol;Acc:1309280]	yes|down	1
ENSRNOG00000025848	Sspo	SCO-spondin [Source:RGD Symbol;Acc:1549716]	yes|up	1
ENSRNOG00000059870	Hoxa11	homeobox A11 [Source:RGD Symbol;Acc:1564605]	yes|up	1
ENSRNOG00000048769	Nek5	NIMA-related kinase 5 [Source:RGD Symbol;Acc:1593817]	yes|up	1
ENSRNOG00000050657	Crlf3	cytokine receptor-like factor 3 [Source:MGI Symbol;Acc:MGI:1860086]	yes|down	1
ENSRNOG00000030155	Bmp8a	bone morphogenetic protein 8a [Source:RGD Symbol;Acc:1585858]	yes|up	1
ENSRNOG00000011321	Rftn1	raftlin lipid raft linker 1 [Source:RGD Symbol;Acc:1563347]	yes|down	1
ENSRNOG00000045679	Apoa1	apolipoprotein A1 [Source:RGD Symbol;Acc:2130]	yes|up	1
ENSRNOG00000009663	Apex1	apurinic/apyrimidinic endodeoxyribonuclease 1 [Source:RGD Symbol;Acc:2126]	yes|down	1
ENSRNOG00000051743	AABR07043822.1		yes|up	1
ENSRNOG00000033772	Serpinb9	serpin family B member 9 [Source:RGD Symbol;Acc:1549730]	yes|down	1
ENSRNOG00000042990	AABR07021804.1	pyrin domain-containing protein 3-like [Source:NCBI gene;Acc:102556096]	yes|down	1
ENSRNOG00000020849	Hcst	hematopoietic cell signal transducer [Source:RGD Symbol;Acc:1359238]	yes|down	1
ENSRNOG00000016069	Cd3e	CD3e molecule [Source:RGD Symbol;Acc:1309222]	yes|down	1
ENSRNOG00000042581	Ptcra	pre T-cell antigen receptor alpha [Source:RGD Symbol;Acc:621388]	yes|down	1
ENSRNOG00000016545	Ift140	intraflagellar transport 140 [Source:RGD Symbol;Acc:2318759]	yes|up	1
ENSRNOG00000005299	Kif5a	kinesin family member 5A [Source:RGD Symbol;Acc:1303035]	yes|up	1
ENSRNOG00000017259	Tacc3	transforming, acidic coiled-coil containing protein 3 [Source:RGD Symbol;Acc:1302948]	yes|down	1
ENSRNOG00000017893	Baiap3	BAI1-associated protein 3 [Source:RGD Symbol;Acc:10059729]	yes|down	1
ENSRNOG00000020653	S1pr2	sphingosine-1-phosphate receptor 2 [Source:RGD Symbol;Acc:68334]	yes|down	1
ENSRNOG00000020652	Tgfb1	transforming growth factor, beta 1 [Source:RGD Symbol;Acc:69051]	yes|down	1
ENSRNOG00000031792	Mcpt1l4	mast cell protease 1-like 4 [Source:RGD Symbol;Acc:1303300]	yes|up	1
ENSRNOG00000039204	Pram1	PML-RARA regulated adaptor molecule 1 [Source:RGD Symbol;Acc:1564330]	yes|down	1
ENSRNOG00000052728	AC122669.1	HOXA11 antisense RNA [Source:NCBI gene;Acc:500128]	yes|up	1
ENSRNOG00000006873	Dnase1	deoxyribonuclease 1 [Source:RGD Symbol;Acc:2510]	yes|up	1
ENSRNOG00000004667	Gen1	GEN1 Holliday junction 5' flap endonuclease [Source:RGD Symbol;Acc:1559792]	yes|down	1
ENSRNOG00000014776	Adcy7	adenylate cyclase 7 [Source:RGD Symbol;Acc:619966]	yes|down	1
ENSRNOG00000009342	Fcnb	ficolin B [Source:RGD Symbol;Acc:621222]	yes|down	1
ENSRNOG00000006878	Slc26a3	solute carrier family 26 member 3 [Source:RGD Symbol;Acc:620623]	yes|up	1
ENSRNOG00000050040	Akr1c13	aldo-keto reductase family 1, member C13 [Source:RGD Symbol;Acc:1308232]	yes|up	1
ENSRNOG00000021370	Ccdc69	coiled-coil domain containing 69 [Source:RGD Symbol;Acc:1562251]	yes|down	1
ENSRNOG00000003998	Sgca	sarcoglycan, alpha [Source:RGD Symbol;Acc:1308062]	yes|up	1
ENSRNOG00000054420	Vdr	vitamin D receptor [Source:RGD Symbol;Acc:3959]	yes|up	1
ENSRNOG00000055111	AABR07000658.1	cyclin B2-like [Source:NCBI gene;Acc:100364016]	yes|down	1
ENSRNOG00000028896	LOC100911545	alpha-2-macroglobulin-like [Source:RGD Symbol;Acc:6492449]	yes|down	1
ENSRNOG00000051065	AABR07072184.2		yes|up	1
ENSRNOG00000004483	Ptprr	protein tyrosine phosphatase, receptor type, R [Source:RGD Symbol;Acc:620780]	yes|up	1
ENSRNOG00000031706	RGD1563601	similar to Tpi1 protein [Source:RGD Symbol;Acc:1563601]	yes|up	1
ENSRNOG00000059579	Gpt2	glutamic--pyruvic transaminase 2 [Source:RGD Symbol;Acc:1305462]	yes|up	1
ENSRNOG00000016810	Stmn1	stathmin 1 [Source:RGD Symbol;Acc:2992]	yes|down	1
ENSRNOG00000009746	Akap17b	A kinase (PRKA) anchor protein 17B [Source:RGD Symbol;Acc:1566363]	yes|down	1
ENSRNOG00000009705	Lck	LCK proto-oncogene, Src family tyrosine kinase [Source:RGD Symbol;Acc:2994]	yes|down	1
ENSRNOG00000054391	Snurf	SNRPN upstream reading frame [Source:RGD Symbol;Acc:69269]	yes|up	1
ENSRNOG00000010284	St3gal5	ST3 beta-galactoside alpha-2,3-sialyltransferase 5 [Source:RGD Symbol;Acc:620875]	yes|down	1
ENSRNOG00000010283	Cd28	Cd28 molecule [Source:RGD Symbol;Acc:2299]	yes|down	1
ENSRNOG00000007744	Ehd3	EH-domain containing 3 [Source:RGD Symbol;Acc:621762]	yes|down	1
ENSRNOG00000016953	Chst4	carbohydrate sulfotransferase 4 [Source:RGD Symbol;Acc:1310798]	yes|up	1
ENSRNOG00000020874	Ppy	pancreatic polypeptide [Source:RGD Symbol;Acc:3385]	yes|up	1
ENSRNOG00000006979	Hpca	hippocalcin [Source:RGD Symbol;Acc:620060]	yes|up	1
ENSRNOG00000020420	Pklr	pyruvate kinase L/R [Source:RGD Symbol;Acc:3336]	yes|up	1
ENSRNOG00000033402	Gsta6	glutathione S-transferase alpha 6 [Source:RGD Symbol;Acc:1565402]	yes|down	1
ENSRNOG00000005687	Slc6a14	solute carrier family 6 member 14 [Source:RGD Symbol;Acc:1561810]	yes|down	1
ENSRNOG00000005729	Palm3	paralemmin 3 [Source:RGD Symbol;Acc:2323602]	yes|up	1
ENSRNOG00000047854	RT1-DMa	RT1 class II, locus DMa [Source:RGD Symbol;Acc:735053]	yes|down	1
ENSRNOG00000048982	LOC100912282	calcium-binding and coiled-coil domain-containing protein 1-like [Source:RGD Symbol;Acc:6488185]	yes|up	1
ENSRNOG00000028415	Cdc20	cell division cycle 20 [Source:RGD Symbol;Acc:620477]	yes|down	1
ENSRNOG00000005720	Spic	Spi-C transcription factor [Source:RGD Symbol;Acc:1306272]	yes|down	1
ENSRNOG00000025012	Chat	choline O-acetyltransferase [Source:RGD Symbol;Acc:1304627]	yes|up	1
ENSRNOG00000009113	Marcksl1	MARCKS-like 1 [Source:RGD Symbol;Acc:621197]	yes|down	1
ENSRNOG00000047657	C4a	complement C4A [Source:RGD Symbol;Acc:620005]	yes|down	1
ENSRNOG00000047931	Tmsb4x	thymosin beta 4, X-linked [Source:RGD Symbol;Acc:621622]	yes|down	1
ENSRNOG00000015410	Aspn	asporin [Source:RGD Symbol;Acc:1549776]	yes|up	1
ENSRNOG00000054511	AABR07035309.1		yes|up	1
ENSRNOG00000010266	Cd180	CD180 molecule [Source:RGD Symbol;Acc:1308170]	yes|down	1
ENSRNOG00000054049	Prelid2	PRELI domain containing 2 [Source:RGD Symbol;Acc:1584707]	yes|up	1
ENSRNOG00000009118	Pou2f3	POU class 2 homeobox 3 [Source:RGD Symbol;Acc:621691]	yes|up	1
ENSRNOG00000036711	Spn	sialophorin [Source:RGD Symbol;Acc:3750]	yes|down	1
ENSRNOG00000015418	Klhl14	kelch-like family member 14 [Source:RGD Symbol;Acc:1566178]	yes|down	1
ENSRNOG00000037782	Gkn3	gastrokine 3 [Source:RGD Symbol;Acc:1597754]	yes|up	1
ENSRNOG00000055809	LOC100911769	band 4.1-like protein 1-like [Source:RGD Symbol;Acc:6490915]	yes|up	1
ENSRNOG00000008492	Cfap45	cilia and flagella associated protein 45 [Source:RGD Symbol;Acc:1561559]	yes|up	1
ENSRNOG00000018346	Agtr1a	angiotensin II receptor, type 1a [Source:RGD Symbol;Acc:2070]	yes|up	1
ENSRNOG00000059890	Clec2d2	C-type lectin domain family 2 member D2 [Source:RGD Symbol;Acc:1562831]	yes|down	1
ENSRNOG00000025946	Igf2bp2	insulin-like growth factor 2 mRNA binding protein 2 [Source:RGD Symbol;Acc:1305614]	yes|up	1
ENSRNOG00000049407	Shisa8	shisa family member 8 [Source:RGD Symbol;Acc:1563996]	yes|down	1
ENSRNOG00000059894	Hmmr	hyaluronan-mediated motility receptor [Source:RGD Symbol;Acc:2805]	yes|down	1
ENSRNOG00000014786	Ccne1	cyclin E1 [Source:RGD Symbol;Acc:2294]	yes|down	1
ENSRNOG00000018997	Myh7b	myosin heavy chain 7B [Source:RGD Symbol;Acc:1307994]	yes|up	1
ENSRNOG00000018238	Nuggc	nuclear GTPase, germinal center associated [Source:RGD Symbol;Acc:1562099]	yes|down	1
ENSRNOG00000017671	Rasa3	RAS p21 protein activator 3 [Source:RGD Symbol;Acc:69365]	yes|down	1
ENSRNOG00000051458	Hic2	HIC ZBTB transcriptional repressor 2 [Source:RGD Symbol;Acc:1305338]	yes|up	1
ENSRNOG00000000158	Cdo1	cysteine dioxygenase type 1 [Source:RGD Symbol;Acc:69262]	yes|up	1
ENSRNOG00000000010	Cbln1	cerebellin 1 precursor [Source:RGD Symbol;Acc:1562813]	yes|down	1
ENSRNOG00000060831	Clca1	chloride channel accessory 1 [Source:RGD Symbol;Acc:1306258]	yes|up	1
ENSRNOG00000002922	Adora2b	adenosine A2B receptor [Source:RGD Symbol;Acc:2050]	yes|up	1
ENSRNOG00000023858	Prss39	protease, serine, 39 [Source:RGD Symbol;Acc:1309276]	yes|down	1
ENSRNOG00000010417	Nol4l	nucleolar protein 4-like [Source:RGD Symbol;Acc:1563510]	yes|up	1
ENSRNOG00000000239	Ccl7	C-C motif chemokine ligand 7 [Source:RGD Symbol;Acc:1359152]	yes|down	1
ENSRNOG00000001833	Mcm4	minichromosome maintenance complex component 4 [Source:RGD Symbol;Acc:3060]	yes|down	1
ENSRNOG00000002800	Gdpd2	glycerophosphodiester phosphodiesterase domain containing 2 [Source:RGD Symbol;Acc:1560780]	yes|up	1
ENSRNOG00000055367	Rnase6	ribonuclease A family member k6 [Source:RGD Symbol;Acc:1303020]	yes|down	1
ENSRNOG00000043137	Lbhd2	LBH domain containing 2 [Source:RGD Symbol;Acc:1560608]	yes|down	1
ENSRNOG00000008040	Pimreg	PICALM interacting mitotic regulator [Source:RGD Symbol;Acc:1308747]	yes|down	1
ENSRNOG00000011022	Mep1a	meprin A subunit alpha [Source:RGD Symbol;Acc:3080]	yes|up	1
ENSRNOG00000005390	Nup210	nucleoporin 210 [Source:RGD Symbol;Acc:69339]	yes|down	1
ENSRNOG00000061085	Fancd2	FA complementation group D2 [Source:RGD Symbol;Acc:1303172]	yes|down	1
ENSRNOG00000018163	Ipcef1	interaction protein for cytohesin exchange factors 1 [Source:RGD Symbol;Acc:735159]	yes|down	1
ENSRNOG00000016041	Zc3h12d	zinc finger CCCH type containing 12D [Source:RGD Symbol;Acc:1597152]	yes|down	1
ENSRNOG00000001837	Sst	somatostatin [Source:RGD Symbol;Acc:3761]	yes|up	1
ENSRNOG00000011094	Efcab6	EF-hand calcium binding domain 6 [Source:RGD Symbol;Acc:1309065]	yes|up	1
ENSRNOG00000017601	Srd5a1	steroid 5 alpha-reductase 1 [Source:RGD Symbol;Acc:3757]	yes|up	1
ENSRNOG00000018426	Apoc1	apolipoprotein C1 [Source:RGD Symbol;Acc:2134]	yes|down	1
ENSRNOG00000042950	Slc5a9	solute carrier family 5 member 9 [Source:RGD Symbol;Acc:1311383]	yes|up	1
ENSRNOG00000026136	Tnfaip8	TNF alpha induced protein 8 [Source:RGD Symbol;Acc:1305908]	yes|down	1
ENSRNOG00000024947	Fabp2	fatty acid binding protein 2 [Source:RGD Symbol;Acc:2591]	yes|up	1
ENSRNOG00000060541	AABR07017825.5		yes|down	1
ENSRNOG00000008106	Shmt2	serine hydroxymethyltransferase 2 [Source:RGD Symbol;Acc:1308582]	yes|down	1
ENSRNOG00000010960	Ankh	ANKH inorganic pyrophosphate transport regulator [Source:RGD Symbol;Acc:619925]	yes|up	1
ENSRNOG00000060422	AC120076.1		yes|down	1
ENSRNOG00000028523	Tctn1	tectonic family member 1 [Source:RGD Symbol;Acc:1566266]	yes|down	1
ENSRNOG00000022239	Trarg1	trafficking regulator of GLUT4 (SLC2A4) 1 [Source:RGD Symbol;Acc:1307639]	yes|up	1
ENSRNOG00000002843	Cxcl6	C-X-C motif chemokine ligand 6 [Source:RGD Symbol;Acc:708540]	yes|down	1
ENSRNOG00000032656	Ptprt	protein tyrosine phosphatase, receptor type, T [Source:RGD Symbol;Acc:1309653]	yes|down	1
ENSRNOG00000000528	Fgd2	FYVE, RhoGEF and PH domain containing 2 [Source:RGD Symbol;Acc:1309840]	yes|down	1
ENSRNOG00000048917	LOC100909604	homeobox protein Hox-A6-like [Source:RGD Symbol;Acc:6502601]	yes|up	1
ENSRNOG00000002659	Ciita	class II, major histocompatibility complex, transactivator [Source:RGD Symbol;Acc:619813]	yes|down	1
ENSRNOG00000048915	Twf2	twinfilin actin-binding protein 2 [Source:RGD Symbol;Acc:1591460]	yes|down	1
ENSRNOG00000026310	March1	membrane associated ring-CH-type finger 1 [Source:RGD Symbol;Acc:1305148]	yes|down	1
ENSRNOG00000025448	Limd2	LIM domain containing 2 [Source:RGD Symbol;Acc:1309967]	yes|down	1
ENSRNOG00000008086	Dpf3	double PHD fingers 3 [Source:RGD Symbol;Acc:1309052]	yes|up	1
ENSRNOG00000037302	Rad51	RAD51 recombinase [Source:RGD Symbol;Acc:1563603]	yes|down	1
ENSRNOG00000061236	LOC108348298	ribosomal L1 domain-containing protein 1-like [Source:RGD Symbol;Acc:11419049]	yes|down	1
ENSRNOG00000033335	Cenpi	centromere protein I [Source:RGD Symbol;Acc:2631]	yes|down	1
ENSRNOG00000008082	Rgs6	regulator of G-protein signaling 6 [Source:RGD Symbol;Acc:3569]	yes|up	1
ENSRNOG00000033338	Gimap6	GTPase, IMAP family member 6 [Source:RGD Symbol;Acc:1305041]	yes|down	1
ENSRNOG00000022320	Primpol	primase and DNA directed polymerase [Source:RGD Symbol;Acc:1562119]	yes|down	1
ENSRNOG00000019361	Inpp5j	inositol polyphosphate-5-phosphatase J [Source:RGD Symbol;Acc:620541]	yes|up	1
ENSRNOG00000000632	Cdk1	cyclin-dependent kinase 1 [Source:RGD Symbol;Acc:2319]	yes|down	1
ENSRNOG00000022325	Smc2	structural maintenance of chromosomes 2 [Source:RGD Symbol;Acc:1305227]	yes|down	1
ENSRNOG00000025111	Nfkbid	NFKB inhibitor delta [Source:RGD Symbol;Acc:1308055]	yes|down	1
ENSRNOG00000019745	Actn3	actinin alpha 3 [Source:RGD Symbol;Acc:621792]	yes|down	1
ENSRNOG00000019744	AABR07032097.1		yes|down	1
ENSRNOG00000024931	Ccdc88b	coiled-coil domain containing 88B [Source:RGD Symbol;Acc:1311475]	yes|down	1
ENSRNOG00000022030	Aunip	aurora kinase A and ninein interacting protein [Source:RGD Symbol;Acc:1589922]	yes|down	1
ENSRNOG00000028548	Ccl9	chemokine (C-C motif) ligand 9 [Source:RGD Symbol;Acc:1310563]	yes|down	1
ENSRNOG00000061147	Fam189a2	family with sequence similarity 189, member A2 [Source:RGD Symbol;Acc:1307524]	yes|up	1
ENSRNOG00000048187	Epop	elongin BC and polycomb repressive complex 2 associated protein [Source:RGD Symbol;Acc:1587434]	yes|down	1
ENSRNOG00000007200	Ikzf3	IKAROS family zinc finger 3 [Source:RGD Symbol;Acc:1307024]	yes|down	1
ENSRNOG00000043182	Sept6	septin 6 [Source:RGD Symbol;Acc:1585082]	yes|down	1
ENSRNOG00000056909	RF00560	predicted gene, 24212 [Source:MGI Symbol;Acc:MGI:5453989]	yes|up	1
ENSRNOG00000002711	Nuf2	NDC80 kinetochore complex component NUF2 [Source:RGD Symbol;Acc:1307952]	yes|down	1
ENSRNOG00000033206	Entpd5	ectonucleoside triphosphate diphosphohydrolase 5 [Source:RGD Symbol;Acc:735219]	yes|up	1
ENSRNOG00000059953	AABR07065656.10		yes|down	1
ENSRNOG00000038960	RGD1309362	similar to interferon-inducible GTPase [Source:RGD Symbol;Acc:1309362]	yes|down	1
ENSRNOG00000055404	AABR07012826.1		yes|down	1
ENSRNOG00000036880	Arl5c	ADP-ribosylation factor like GTPase 5C [Source:RGD Symbol;Acc:1563128]	yes|down	1
ENSRNOG00000016257	Cotl1	coactosin-like F-actin binding protein 1 [Source:RGD Symbol;Acc:1305498]	yes|down	1
ENSRNOG00000033209	Bmp8b	bone morphogenetic protein 8b [Source:RGD Symbol;Acc:1591873]	yes|up	1
ENSRNOG00000013727	Ndc80	NDC80 kinetochore complex component [Source:RGD Symbol;Acc:1310154]	yes|down	1
ENSRNOG00000010262	Hdc	histidine decarboxylase [Source:RGD Symbol;Acc:2790]	yes|up	1
ENSRNOG00000046848	PCOLCE2	procollagen C-endopeptidase enhancer 2 [Source:RGD Symbol;Acc:1595195]	yes|up	1
ENSRNOG00000015423	Ccna2	cyclin A2 [Source:RGD Symbol;Acc:621059]	yes|down	1
ENSRNOG00000001746	Ncbp2	nuclear cap binding protein subunit 2 [Source:RGD Symbol;Acc:1596188]	yes|up	1
ENSRNOG00000025360	Exd1	exonuclease 3'-5' domain containing 1 [Source:RGD Symbol;Acc:1561009]	yes|up	1
ENSRNOG00000008554	Slc9a9	solute carrier family 9 member A9 [Source:RGD Symbol;Acc:1560736]	yes|down	1
ENSRNOG00000032778	Bub1	BUB1 mitotic checkpoint serine/threonine kinase [Source:RGD Symbol;Acc:1311707]	yes|down	1
ENSRNOG00000008553	Mthfr	methylenetetrahydrofolate reductase [Source:RGD Symbol;Acc:1309952]	yes|up	1
ENSRNOG00000059199	AABR07065705.4		yes|down	1
ENSRNOG00000001821	Adipoq	adiponectin, C1Q and collagen domain containing [Source:RGD Symbol;Acc:628748]	yes|up	1
ENSRNOG00000022712	Bend7	BEN domain containing 7 [Source:RGD Symbol;Acc:1305898]	yes|up	1
ENSRNOG00000046468	Ptgfr	prostaglandin F receptor [Source:RGD Symbol;Acc:3436]	yes|down	1
ENSRNOG00000001827	Masp1	mannan-binding lectin serine peptidase 1 [Source:RGD Symbol;Acc:620213]	yes|down	1
ENSRNOG00000007290	Atp1a2	ATPase Na+/K+ transporting subunit alpha 2 [Source:RGD Symbol;Acc:2168]	yes|up	1
ENSRNOG00000015042	Cysltr2	cysteinyl leukotriene receptor 2 [Source:RGD Symbol;Acc:619797]	yes|down	1
ENSRNOG00000021847	Ska3	spindle and kinetochore associated complex subunit 3 [Source:RGD Symbol;Acc:1307201]	yes|down	1
ENSRNOG00000001167	Ubash3a	ubiquitin associated and SH3 domain containing, A [Source:RGD Symbol;Acc:1310305]	yes|down	1
ENSRNOG00000043350	Cap2	cyclase associated actin cytoskeleton regulatory protein 2 [Source:RGD Symbol;Acc:620310]	yes|up	1
ENSRNOG00000019614	Ptpn22	protein tyrosine phosphatase, non-receptor type 22 [Source:RGD Symbol;Acc:1307992]	yes|down	1
ENSRNOG00000003769	Tmem163	transmembrane protein 163 [Source:RGD Symbol;Acc:1306212]	yes|down	1
ENSRNOG00000000795	RT1-N3	RT1 class Ib, locus N3 [Source:RGD Symbol;Acc:1598370]	yes|down	1
ENSRNOG00000043451	Spp1	secreted phosphoprotein 1 [Source:RGD Symbol;Acc:3752]	yes|down	1
ENSRNOG00000011815	Sgk1	serum/glucocorticoid regulated kinase 1 [Source:RGD Symbol;Acc:3668]	yes|up	1
ENSRNOG00000013791	Enpp3	ectonucleotide pyrophosphatase/phosphodiesterase 3 [Source:RGD Symbol;Acc:708511]	yes|down	1
ENSRNOG00000012318	Aspm	abnormal spindle microtubule assembly [Source:RGD Symbol;Acc:1307111]	yes|down	1
ENSRNOG00000013794	Rbp1	retinol binding protein 1 [Source:RGD Symbol;Acc:3543]	yes|down	1
ENSRNOG00000006761	Sh3gl2	SH3 domain containing GRB2 like 2, endophilin A1 [Source:RGD Symbol;Acc:620276]	yes|up	1
ENSRNOG00000004089	Enpp2	ectonucleotide pyrophosphatase/phosphodiesterase 2 [Source:RGD Symbol;Acc:69298]	yes|down	1
ENSRNOG00000007370	Rnf144a	ring finger protein 144A [Source:RGD Symbol;Acc:1561737]	yes|down	1
ENSRNOG00000046240	AABR07022023.1		yes|up	1
ENSRNOG00000046168	Ppm1l	protein phosphatase, Mg2+/Mn2+ dependent, 1L [Source:RGD Symbol;Acc:1305220]	yes|up	1
ENSRNOG00000017766	Car12	carbonic anhydrase 12 [Source:RGD Symbol;Acc:1306612]	yes|up	1
ENSRNOG00000056297	Fmnl3	formin-like 3 [Source:RGD Symbol;Acc:1583854]	yes|down	1
ENSRNOG00000025069	Ly9	lymphocyte antigen 9 [Source:RGD Symbol;Acc:1308341]	yes|down	1
ENSRNOG00000015520	Ticrr	TOPBP1-interacting checkpoint and replication regulator [Source:RGD Symbol;Acc:1308541]	yes|down	1
ENSRNOG00000004192	Arhgap30	Rho GTPase activating protein 30 [Source:RGD Symbol;Acc:1561419]	yes|down	1
ENSRNOG00000012302	Gucy1a1	guanylate cyclase 1 soluble subunit alpha 1 [Source:RGD Symbol;Acc:68436]	yes|up	1
ENSRNOG00000047368	Acer1	alkaline ceramidase 1 [Source:RGD Symbol;Acc:1588582]	yes|up	1
ENSRNOG00000024641	LOC100910838	neuronal tyrosine-phosphorylated phosphoinositide-3-kinase adapter 1-like [Source:RGD Symbol;Acc:6496186]	yes|up	1
ENSRNOG00000015585	Suv39h2	suppressor of variegation 3-9 homolog 2 [Source:RGD Symbol;Acc:1306969]	yes|down	1
ENSRNOG00000002568	Socs1	suppressor of cytokine signaling 1 [Source:RGD Symbol;Acc:69272]	yes|down	1
ENSRNOG00000020248	Ina	internexin neuronal intermediate filament protein, alpha [Source:RGD Symbol;Acc:2911]	yes|up	1
ENSRNOG00000029308	Lrmp	lymphoid-restricted membrane protein [Source:NCBI gene;Acc:500361]	yes|down	1
ENSRNOG00000026866	Syn3	synapsin III [Source:RGD Symbol;Acc:3799]	yes|up	1
ENSRNOG00000033444	F10	coagulation factor X [Source:RGD Symbol;Acc:61850]	yes|down	1
ENSRNOG00000038365	Plekha2	pleckstrin homology domain containing A2 [Source:RGD Symbol;Acc:1586710]	yes|down	1
ENSRNOG00000031930	Bin2	bridging integrator 2 [Source:RGD Symbol;Acc:1306789]	yes|down	1
ENSRNOG00000020169	Gimap8	GTPase, IMAP family member 8 [Source:RGD Symbol;Acc:1564570]	yes|down	1
ENSRNOG00000013641	Myo7a	myosin VIIA [Source:RGD Symbol;Acc:628830]	yes|down	1
ENSRNOG00000034164	Cr2	complement C3d receptor 2 [Source:RGD Symbol;Acc:1310065]	yes|down	1
ENSRNOG00000028781	Abcc6	ATP binding cassette subfamily C member 6 [Source:RGD Symbol;Acc:620268]	yes|up	1
ENSRNOG00000054012	AABR07060957.1		yes|down	1
ENSRNOG00000021061	Map4k2	mitogen activated protein kinase kinase kinase kinase 2 [Source:RGD Symbol;Acc:1308199]	yes|down	1
ENSRNOG00000005505	Wbp11l1	WW domain-binding protein 11-like 1 [Source:RGD Symbol;Acc:9435381]	yes|down	1
ENSRNOG00000006010	Slc6a20	solute carrier family 6 member 20 [Source:RGD Symbol;Acc:621651]	yes|up	1
ENSRNOG00000024420	Eme1	essential meiotic structure-specific endonuclease 1 [Source:RGD Symbol;Acc:1309067]	yes|down	1
ENSRNOG00000024277	AABR07035470.1	caspase recruitment domain family, member 11 [Source:NCBI gene;Acc:100363332]	yes|down	1
ENSRNOG00000024428	Kif20a	kinesin family member 20A [Source:RGD Symbol;Acc:1307695]	yes|down	1
ENSRNOG00000020945	Ms4a1	membrane spanning 4-domains A1 [Source:RGD Symbol;Acc:1311999]	yes|down	1
ENSRNOG00000009503	Depdc1	DEP domain containing 1 [Source:RGD Symbol;Acc:1306987]	yes|down	1
ENSRNOG00000013970	Cdt1	chromatin licensing and DNA replication factor 1 [Source:RGD Symbol;Acc:1309211]	yes|down	1
ENSRNOG00000013971	Psat1	phosphoserine aminotransferase 1 [Source:RGD Symbol;Acc:735170]	yes|down	1
ENSRNOG00000016593	Pde6c	phosphodiesterase 6C [Source:RGD Symbol;Acc:1309844]	yes|down	1
ENSRNOG00000046086	Tmc8	transmembrane channel-like 8 [Source:RGD Symbol;Acc:1591150]	yes|down	1
ENSRNOG00000001752	Nrros	negative regulator of reactive oxygen species [Source:RGD Symbol;Acc:1310771]	yes|down	1
ENSRNOG00000051950	Cnga3	cyclic nucleotide gated channel alpha 3 [Source:RGD Symbol;Acc:70948]	yes|up	1
ENSRNOG00000010886	Nfe2l3	nuclear factor, erythroid 2-like 3 [Source:RGD Symbol;Acc:1307730]	yes|up	1
ENSRNOG00000009910	Swap70	switching B-cell complex subunit SWAP70 [Source:RGD Symbol;Acc:1305579]	yes|down	1
ENSRNOG00000002312	Atp10d	ATPase phospholipid transporting 10D (putative) [Source:RGD Symbol;Acc:1588541]	yes|down	1
ENSRNOG00000011631	Fst	follistatin [Source:RGD Symbol;Acc:2633]	yes|up	1
ENSRNOG00000022868	Ell3	elongation factor for RNA polymerase II 3 [Source:RGD Symbol;Acc:1309917]	yes|down	1
ENSRNOG00000039560	LOC103690116	osteomodulin [Source:RGD Symbol;Acc:9400356]	yes|up	1
ENSRNOG00000007879	Stk26	serine/threonine kinase 26 [Source:RGD Symbol;Acc:1563568]	yes|down	1
