# Supplementary material for: Xuedan Sustained Release Pellets Ameliorate Dextran Sulfate Sodium–Induced Ulcerative Colitis in Rats by Targeting Gut Microbiota and MAPK Signaling Pathways
Source: Frontiers journal article supplement (doi:10.3389/fphar.2022.833972), 2022-04-20
Supplement: Data_Sheet_1.ZIP [file Figure 7B-2.xls]

## Sheet: 表达量差异统计表
Gene_id	Gene_name	Gene_description	Model_vs_Control	Sum
1750			1750	1750
ENSRNOG00000020719	Hrc	histidine rich calcium binding protein [Source:RGD Symbol;Acc:727864]	yes|up	1
ENSRNOG00000015829	Trpm1	transient receptor potential cation channel, subfamily M, member 1 [Source:RGD Symbol;Acc:1597140]	yes|down	1
ENSRNOG00000001439	Srrm3	serine/arginine repetitive matrix 3 [Source:RGD Symbol;Acc:1587868]	yes|up	1
ENSRNOG00000025290	AABR07038029.1		yes|up	1
ENSRNOG00000017311	Me3	malic enzyme 3 [Source:RGD Symbol;Acc:1311070]	yes|up	1
ENSRNOG00000042465	Zbtb32	zinc finger and BTB domain containing 32 [Source:RGD Symbol;Acc:1584121]	yes|down	1
ENSRNOG00000005115	Asf1b	anti-silencing function 1B histone chaperone [Source:RGD Symbol;Acc:1304918]	yes|down	1
ENSRNOG00000011078	Srm	spermidine synthase [Source:RGD Symbol;Acc:620796]	yes|down	1
ENSRNOG00000056631	AABR07038021.1		yes|up	1
ENSRNOG00000011205	Ccl3	C-C motif chemokine ligand 3 [Source:RGD Symbol;Acc:3647]	yes|down	1
ENSRNOG00000030788	Olr35	olfactory receptor 35 [Source:RGD Symbol;Acc:1333428]	yes|up	1
ENSRNOG00000027831	Map7d3	MAP7 domain containing 3 [Source:RGD Symbol;Acc:1565514]	yes|up	1
ENSRNOG00000002381	Bmp3	bone morphogenetic protein 3 [Source:RGD Symbol;Acc:2212]	yes|up	1
ENSRNOG00000046949	Kcnb1	potassium voltage-gated channel subfamily B member 1 [Source:RGD Symbol;Acc:2954]	yes|up	1
ENSRNOG00000002387	Tceal1	transcription elongation factor A like 1 [Source:RGD Symbol;Acc:1549724]	yes|up	1
ENSRNOG00000011483	S100a9	S100 calcium binding protein A9 [Source:RGD Symbol;Acc:620267]	yes|down	1
ENSRNOG00000012122	Clvs2	clavesin 2 [Source:RGD Symbol;Acc:1306801]	yes|up	1
ENSRNOG00000037409	Scimp	SLP adaptor and CSK interacting membrane protein [Source:RGD Symbol;Acc:1593299]	yes|down	1
ENSRNOG00000009401	Lmo2	LIM domain only 2 [Source:RGD Symbol;Acc:1307101]	yes|down	1
ENSRNOG00000049033	Racgap1	Rac GTPase-activating protein 1 [Source:RGD Symbol;Acc:1305912]	yes|down	1
ENSRNOG00000021546	Sit1	signaling threshold regulating transmembrane adaptor 1 [Source:RGD Symbol;Acc:1559919]	yes|down	1
ENSRNOG00000021669	Mybl1	MYB proto-oncogene like 1 [Source:RGD Symbol;Acc:1306940]	yes|down	1
ENSRNOG00000028733	Prkar1b	protein kinase cAMP-dependent type 1 regulatory subunit beta [Source:RGD Symbol;Acc:3392]	yes|up	1
ENSRNOG00000013376	Mvd	mevalonate diphosphate decarboxylase [Source:RGD Symbol;Acc:621292]	yes|down	1
ENSRNOG00000009970	Gsdme	gasdermin E [Source:MGI Symbol;Acc:MGI:1889850]	yes|up	1
ENSRNOG00000005609	Neurod1	neuronal differentiation 1 [Source:RGD Symbol;Acc:3165]	yes|up	1
ENSRNOG00000053889	Celsr3	cadherin, EGF LAG seven-pass G-type receptor 3 [Source:RGD Symbol;Acc:621787]	yes|up	1
ENSRNOG00000015736	Dhrs3	dehydrogenase/reductase 3 [Source:RGD Symbol;Acc:1305584]	yes|up	1
ENSRNOG00000027230	Fhod3	formin homology 2 domain containing 3 [Source:RGD Symbol;Acc:2322319]	yes|up	1
ENSRNOG00000009580	Lca5	LCA5, lebercilin [Source:RGD Symbol;Acc:1308555]	yes|down	1
ENSRNOG00000015821	Cd2	Cd2 molecule [Source:RGD Symbol;Acc:2297]	yes|down	1
ENSRNOG00000005947	Pde6h	phosphodiesterase 6H [Source:RGD Symbol;Acc:70933]	yes|down	1
ENSRNOG00000004730	Meis2	Meis homeobox 2 [Source:RGD Symbol;Acc:1305198]	yes|up	1
ENSRNOG00000001990	Ugt2b10	UDP glucuronosyltransferase 2 family, polypeptide B10 [Source:RGD Symbol;Acc:1309989]	yes|up	1
ENSRNOG00000003915	Tmem206	transmembrane protein 206 [Source:RGD Symbol;Acc:1359339]	yes|down	1
ENSRNOG00000027787	Cdc6	cell division cycle 6 [Source:RGD Symbol;Acc:1309157]	yes|down	1
ENSRNOG00000051770	Cyp2w1	cytochrome P450, family 2, subfamily w, polypeptide 1 [Source:RGD Symbol;Acc:1305193]	yes|up	1
ENSRNOG00000030547	Dpp6	dipeptidyl peptidase like 6 [Source:RGD Symbol;Acc:68402]	yes|up	1
ENSRNOG00000009571	Wipf3	WAS/WASL interacting protein family, member 3 [Source:RGD Symbol;Acc:708559]	yes|up	1
ENSRNOG00000000502	Def6	DEF6 guanine nucleotide exchange factor [Source:RGD Symbol;Acc:1307945]	yes|down	1
ENSRNOG00000005932	Megf9	multiple EGF-like-domains 9 [Source:RGD Symbol;Acc:1308330]	yes|up	1
ENSRNOG00000058681	Tsga10	testis specific 10 [Source:RGD Symbol;Acc:621142]	yes|up	1
ENSRNOG00000002135	Sgcb	sarcoglycan, beta [Source:RGD Symbol;Acc:1594202]	yes|up	1
ENSRNOG00000007739	Rars	arginyl-tRNA synthetase [Source:RGD Symbol;Acc:1309215]	yes|down	1
ENSRNOG00000017429	Lat	linker for activation of T cells [Source:RGD Symbol;Acc:620802]	yes|down	1
ENSRNOG00000004839	B4galnt1	beta-1,4-N-acetyl-galactosaminyl transferase 1 [Source:RGD Symbol;Acc:620490]	yes|down	1
ENSRNOG00000037919	Chic1	cysteine-rich hydrophobic domain 1 [Source:RGD Symbol;Acc:1589722]	yes|up	1
ENSRNOG00000050697	Ctsz	cathepsin Z [Source:RGD Symbol;Acc:708479]	yes|down	1
ENSRNOG00000021713	Kif18b	kinesin family member 18B [Source:RGD Symbol;Acc:1310360]	yes|down	1
ENSRNOG00000014524	S1pr3	sphingosine-1-phosphate receptor 3 [Source:RGD Symbol;Acc:1583843]	yes|down	1
ENSRNOG00000061833	AABR07017635.2		yes|down	1
ENSRNOG00000016890	Tppp3	tubulin polymerization-promoting protein family member 3 [Source:RGD Symbol;Acc:1305061]	yes|up	1
ENSRNOG00000022248	Fbxl16	F-box and leucine-rich repeat protein 16 [Source:RGD Symbol;Acc:1309127]	yes|up	1
ENSRNOG00000004659	Creld2	cysteine-rich with EGF-like domains 2 [Source:RGD Symbol;Acc:1310614]	yes|down	1
ENSRNOG00000014702	Elovl2	ELOVL fatty acid elongase 2 [Source:RGD Symbol;Acc:1308605]	yes|up	1
ENSRNOG00000018915	Tagap	T-cell activation RhoGTPase activating protein [Source:RGD Symbol;Acc:1308618]	yes|down	1
ENSRNOG00000050675	Myl4	myosin, light chain 4 [Source:RGD Symbol;Acc:1591197]	yes|down	1
ENSRNOG00000004642	Lmx1a	LIM homeobox transcription factor 1 alpha [Source:RGD Symbol;Acc:1304784]	yes|up	1
ENSRNOG00000028598	Edar	ectodysplasin-A receptor [Source:RGD Symbol;Acc:1561714]	yes|up	1
ENSRNOG00000009298	Fbxo44	F-box protein 44 [Source:RGD Symbol;Acc:1562463]	yes|up	1
ENSRNOG00000011777	Spag5	sperm associated antigen 5 [Source:RGD Symbol;Acc:620152]	yes|down	1
ENSRNOG00000010575	Dapp1	dual adaptor of phosphotyrosine and 3-phosphoinositides 1 [Source:RGD Symbol;Acc:1310189]	yes|down	1
ENSRNOG00000009050	Amn	amnion associated transmembrane protein [Source:RGD Symbol;Acc:1308634]	yes|up	1
ENSRNOG00000050071	Cdc45	cell division cycle 45 [Source:RGD Symbol;Acc:1590928]	yes|down	1
ENSRNOG00000000091	LOC103691556	mothers against decapentaplegic homolog 9 [Source:RGD Symbol;Acc:9309512]	yes|up	1
ENSRNOG00000009054	Elmod1	ELMO domain containing 1 [Source:RGD Symbol;Acc:1564186]	yes|up	1
ENSRNOG00000004794	Rtn1	reticulon 1 [Source:RGD Symbol;Acc:620986]	yes|up	1
ENSRNOG00000017421	Alpk2	alpha-kinase 2 [Source:RGD Symbol;Acc:1564431]	yes|up	1
ENSRNOG00000059491	Fgd4	FYVE, RhoGEF and PH domain containing 4 [Source:RGD Symbol;Acc:708357]	yes|up	1
ENSRNOG00000061273	AABR07021972.1		yes|up	1
ENSRNOG00000020531	Fen1	flap structure-specific endonuclease 1 [Source:RGD Symbol;Acc:621821]	yes|down	1
ENSRNOG00000058545	Arhgap4	Rho GTPase activating protein 4 [Source:RGD Symbol;Acc:628901]	yes|down	1
ENSRNOG00000008904	Fli1	Fli-1 proto-oncogene, ETS transcription factor [Source:RGD Symbol;Acc:1309837]	yes|down	1
ENSRNOG00000032941	Mab21l1	mab-21 like 1 [Source:RGD Symbol;Acc:1589984]	yes|up	1
ENSRNOG00000006963	Ctse	cathepsin E [Source:RGD Symbol;Acc:2446]	yes|down	1
ENSRNOG00000018851	Ppp2r2b	protein phosphatase 2, regulatory subunit B, beta [Source:RGD Symbol;Acc:631441]	yes|up	1
ENSRNOG00000012207	Dst	dystonin [Source:RGD Symbol;Acc:1306566]	yes|up	1
ENSRNOG00000020434	Ascl2	achaete-scute family bHLH transcription factor 2 [Source:RGD Symbol;Acc:2159]	yes|down	1
ENSRNOG00000003028	Dnah17	dynein, axonemal, heavy chain 17 [Source:RGD Symbol;Acc:1563805]	yes|down	1
ENSRNOG00000010319	Lcp1	lymphocyte cytosolic protein 1 [Source:RGD Symbol;Acc:1308288]	yes|down	1
ENSRNOG00000052954	Ccdc173	coiled-coil domain containing 173 [Source:RGD Symbol;Acc:1308818]	yes|up	1
ENSRNOG00000010315	Ccr4	C-C motif chemokine receptor 4 [Source:RGD Symbol;Acc:620594]	yes|down	1
ENSRNOG00000049870	AABR07065812.2		yes|down	1
ENSRNOG00000010701	Depdc1b	DEP domain containing 1B [Source:RGD Symbol;Acc:1305799]	yes|down	1
ENSRNOG00000004392	Aatk	apoptosis-associated tyrosine kinase [Source:RGD Symbol;Acc:1590980]	yes|up	1
ENSRNOG00000004393	Fcamr	Fc fragment of IgA and IgM receptor [Source:RGD Symbol;Acc:1584674]	yes|down	1
ENSRNOG00000059381	Mrps6	mitochondrial ribosomal protein S6 [Source:RGD Symbol;Acc:2322928]	yes|down	1
ENSRNOG00000003866	Cxcr4	C-X-C motif chemokine receptor 4 [Source:RGD Symbol;Acc:620465]	yes|down	1
ENSRNOG00000059387	AABR07067233.1		yes|up	1
ENSRNOG00000011654	Plk4	polo-like kinase 4 [Source:RGD Symbol;Acc:1305390]	yes|down	1
ENSRNOG00000011550	Kcnab2	potassium voltage-gated channel subfamily A regulatory beta subunit 2 [Source:RGD Symbol;Acc:61828]	yes|down	1
ENSRNOG00000006030	Ptprz1	protein tyrosine phosphatase, receptor type Z1 [Source:RGD Symbol;Acc:3455]	yes|up	1
ENSRNOG00000055078	Cyp4b1	cytochrome P450, family 4, subfamily b, polypeptide 1 [Source:RGD Symbol;Acc:2480]	yes|up	1
ENSRNOG00000026958	Cyren	cell cycle regulator of NHEJ [Source:RGD Symbol;Acc:1563238]	yes|down	1
ENSRNOG00000011557	S100a8	S100 calcium binding protein A8 [Source:RGD Symbol;Acc:620265]	yes|down	1
ENSRNOG00000010386	H2afx	H2A histone family, member X [Source:RGD Symbol;Acc:1566119]	yes|down	1
ENSRNOG00000037707	Armcx6	armadillo repeat containing, X-linked 6 [Source:RGD Symbol;Acc:1359303]	yes|up	1
ENSRNOG00000011313	Sorcs1	sortilin-related VPS10 domain containing receptor 1 [Source:RGD Symbol;Acc:1305910]	yes|up	1
ENSRNOG00000025895	Cavin2	caveolae associated protein 2 [Source:RGD Symbol;Acc:1359345]	yes|up	1
ENSRNOG00000017767	Mrvi1	murine retrovirus integration site 1 homolog [Source:RGD Symbol;Acc:1309828]	yes|up	1
ENSRNOG00000004498	Scin	scinderin [Source:RGD Symbol;Acc:735034]	yes|up	1
ENSRNOG00000014791	Peg3	paternally expressed 3 [Source:RGD Symbol;Acc:2323590]	yes|up	1
ENSRNOG00000014793	Gpr149	G protein-coupled receptor 149 [Source:RGD Symbol;Acc:619890]	yes|up	1
ENSRNOG00000031168	Arhgap15	Rho GTPase activating protein 15 [Source:RGD Symbol;Acc:1359304]	yes|down	1
ENSRNOG00000005420	Abcg8	ATP binding cassette subfamily G member 8 [Source:RGD Symbol;Acc:620300]	yes|down	1
ENSRNOG00000014018	St8sia1	ST8 alpha-N-acetyl-neuraminide alpha-2,8-sialyltransferase 1 [Source:RGD Symbol;Acc:3679]	yes|down	1
ENSRNOG00000017689	Itih3	inter-alpha trypsin inhibitor, heavy chain 3 [Source:RGD Symbol;Acc:620633]	yes|up	1
ENSRNOG00000039357	Fam129c	family with sequence similarity 129, member C [Source:RGD Symbol;Acc:1566103]	yes|down	1
ENSRNOG00000017680	Dennd2d	DENN domain containing 2D [Source:RGD Symbol;Acc:1305120]	yes|down	1
ENSRNOG00000005542	Apob	apolipoprotein B [Source:RGD Symbol;Acc:2129]	yes|up	1
ENSRNOG00000000060	Cplx1	complexin 1 [Source:RGD Symbol;Acc:70944]	yes|up	1
ENSRNOG00000000321	Cd24	CD24 molecule [Source:RGD Symbol;Acc:2298]	yes|down	1
ENSRNOG00000051307	Aoc3	amine oxidase, copper containing 3 [Source:RGD Symbol;Acc:62058]	yes|up	1
ENSRNOG00000011136	Osr2	odd-skipped related transciption factor 2 [Source:RGD Symbol;Acc:1305812]	yes|up	1
ENSRNOG00000037524	Adam6	a disintegrin and metallopeptidase domain 6 [Source:RGD Symbol;Acc:621472]	yes|down	1
ENSRNOG00000028261	Tppp	tubulin polymerization promoting protein [Source:RGD Symbol;Acc:1310121]	yes|up	1
ENSRNOG00000011133	Trpc4	transient receptor potential cation channel, subfamily C, member 4 [Source:RGD Symbol;Acc:621276]	yes|up	1
ENSRNOG00000032002	Hapln1	hyaluronan and proteoglycan link protein 1 [Source:RGD Symbol;Acc:2412]	yes|up	1
ENSRNOG00000023841	Cd99l2	CD99 molecule-like 2 [Source:RGD Symbol;Acc:620896]	yes|up	1
ENSRNOG00000020400	Mef2b	myocyte enhancer factor 2B [Source:RGD Symbol;Acc:1561733]	yes|down	1
ENSRNOG00000016708	Necab3	N-terminal EF-hand calcium binding protein 3 [Source:RGD Symbol;Acc:1310124]	yes|down	1
ENSRNOG00000002793	Sstr2	somatostatin receptor 2 [Source:RGD Symbol;Acc:3763]	yes|up	1
ENSRNOG00000052518	AABR07025387.1		yes|up	1
ENSRNOG00000048222	Nlrc5	NLR family, CARD domain containing 5 [Source:RGD Symbol;Acc:1309166]	yes|down	1
ENSRNOG00000026407	Fam184a	family with sequence similarity 184, member A [Source:RGD Symbol;Acc:1311294]	yes|up	1
ENSRNOG00000048053	AC128859.3		yes|down	1
ENSRNOG00000045846	Rfx2	regulatory factor X2 [Source:RGD Symbol;Acc:1588579]	yes|up	1
ENSRNOG00000014083	Iqsec3	IQ motif and Sec7 domain 3 [Source:RGD Symbol;Acc:1593191]	yes|up	1
ENSRNOG00000018599	Gga2	golgi associated, gamma adaptin ear containing, ARF binding protein 2 [Source:RGD Symbol;Acc:1304800]	yes|down	1
ENSRNOG00000059140	Myo1g	myosin IG [Source:RGD Symbol;Acc:1306016]	yes|down	1
ENSRNOG00000017619	Aldh1a1	aldehyde dehydrogenase 1 family, member A1 [Source:RGD Symbol;Acc:2087]	yes|up	1
ENSRNOG00000016632	Dsg3	desmoglein 3 [Source:RGD Symbol;Acc:1592103]	yes|down	1
ENSRNOG00000023337	Sema3a	semaphorin 3A [Source:RGD Symbol;Acc:3657]	yes|up	1
ENSRNOG00000003468	Capn8	calpain 8 [Source:RGD Symbol;Acc:620085]	yes|up	1
ENSRNOG00000004067	Nrcam	neuronal cell adhesion molecule [Source:RGD Symbol;Acc:3209]	yes|up	1
ENSRNOG00000060439	AABR07012131.1		yes|down	1
ENSRNOG00000009872	Kcnh2	potassium voltage-gated channel subfamily H member 2 [Source:RGD Symbol;Acc:621414]	yes|up	1
ENSRNOG00000008133	Mfng	MFNG O-fucosylpeptide 3-beta-N-acetylglucosaminyltransferase [Source:RGD Symbol;Acc:735126]	yes|down	1
ENSRNOG00000008134	Mefv	MEFV, pyrin innate immunity regulator [Source:RGD Symbol;Acc:61889]	yes|down	1
ENSRNOG00000022521	Ddias	DNA damage-induced apoptosis suppressor [Source:RGD Symbol;Acc:1559690]	yes|down	1
ENSRNOG00000060693	Catsperg	cation channel sperm associated auxiliary subunit gamma [Source:RGD Symbol;Acc:1310942]	yes|up	1
ENSRNOG00000055498	Derl3	derlin 3 [Source:RGD Symbol;Acc:1597373]	yes|down	1
ENSRNOG00000046975	Sult4a1	sulfotransferase family 4A, member 1 [Source:RGD Symbol;Acc:69292]	yes|up	1
ENSRNOG00000018577	Neil1	nei-like DNA glycosylase 1 [Source:RGD Symbol;Acc:1306077]	yes|down	1
ENSRNOG00000037456	P2rx2	purinergic receptor P2X 2 [Source:RGD Symbol;Acc:620251]	yes|up	1
ENSRNOG00000016388	Sphkap	SPHK1 interactor, AKAP domain containing [Source:RGD Symbol;Acc:1311951]	yes|up	1
ENSRNOG00000018674	Ntrk3	neurotrophic receptor tyrosine kinase 3 [Source:RGD Symbol;Acc:3214]	yes|up	1
ENSRNOG00000052205	Fgf23	fibroblast growth factor 23 [Source:RGD Symbol;Acc:620178]	yes|down	1
ENSRNOG00000052204	Tbc1d24	TBC1 domain family, member 24 [Source:RGD Symbol;Acc:1306143]	yes|up	1
ENSRNOG00000043044	Cnn2	calponin 2 [Source:RGD Symbol;Acc:1589807]	yes|down	1
ENSRNOG00000007049	Bcl11a	BCL11A, BAF complex component [Source:RGD Symbol;Acc:1309923]	yes|down	1
ENSRNOG00000008481	Reep1	receptor accessory protein 1 [Source:RGD Symbol;Acc:1305230]	yes|up	1
ENSRNOG00000016413	Pstpip1	proline-serine-threonine phosphatase-interacting protein 1 [Source:RGD Symbol;Acc:1307557]	yes|down	1
ENSRNOG00000008721	Crnn	cornulin [Source:RGD Symbol;Acc:1311778]	yes|down	1
ENSRNOG00000061347	AABR07054490.1		yes|down	1
ENSRNOG00000025476	Tmem252	transmembrane protein 252 [Source:RGD Symbol;Acc:1359349]	yes|up	1
ENSRNOG00000016148	Gtse1	G-2 and S-phase expressed 1 [Source:RGD Symbol;Acc:1563164]	yes|down	1
ENSRNOG00000019311	Nfkb2	nuclear factor kappa B subunit 2 [Source:RGD Symbol;Acc:1307189]	yes|down	1
ENSRNOG00000048636	Il2rb	interleukin 2 receptor subunit beta [Source:RGD Symbol;Acc:2896]	yes|down	1
ENSRNOG00000060448	Hand2	heart and neural crest derivatives expressed 2 [Source:NCBI gene;Acc:64637]	yes|up	1
ENSRNOG00000047697	Ggt1	gamma-glutamyltransferase 1 [Source:RGD Symbol;Acc:2683]	yes|down	1
ENSRNOG00000008005	Akna	AT-hook transcription factor [Source:RGD Symbol;Acc:1308202]	yes|down	1
ENSRNOG00000047503	Apoc3	apolipoprotein C3 [Source:RGD Symbol;Acc:2136]	yes|up	1
ENSRNOG00000014336	Mcm5	minichromosome maintenance complex component 5 [Source:RGD Symbol;Acc:1306616]	yes|down	1
ENSRNOG00000038896	Upk3bl1	uroplakin 3B like 1 [Source:RGD Symbol;Acc:1598237]	yes|up	1
ENSRNOG00000058416	Smad9	SMAD family member 9 [Source:RGD Symbol;Acc:71004]	yes|up	1
ENSRNOG00000043199	Bves	blood vessel epicardial substance [Source:RGD Symbol;Acc:1561100]	yes|up	1
ENSRNOG00000022791	AABR07064386.1	similar to C14orf25 protein [Source:NCBI gene;Acc:366631]	yes|up	1
ENSRNOG00000060329	Emb	embigin [Source:RGD Symbol;Acc:621067]	yes|down	1
ENSRNOG00000055650	Pou2f2	POU class 2 homeobox 2 [Source:RGD Symbol;Acc:621690]	yes|down	1
ENSRNOG00000006761	Sh3gl2	SH3 domain containing GRB2 like 2, endophilin A1 [Source:RGD Symbol;Acc:620276]	yes|up	1
ENSRNOG00000007561	Glb1l2	galactosidase, beta 1-like 2 [Source:RGD Symbol;Acc:1564436]	yes|up	1
ENSRNOG00000038976	AABR07025368.1	polypeptide N-acetylgalactosaminyltransferase-like 6 [Source:NCBI gene;Acc:361142]	yes|up	1
ENSRNOG00000033215	RT1-Db1	RT1 class II, locus Db1 [Source:RGD Symbol;Acc:1593282]	yes|down	1
ENSRNOG00000012964	Ccr6	C-C motif chemokine receptor 6 [Source:RGD Symbol;Acc:1308562]	yes|down	1
ENSRNOG00000022957	Ctxn3	cortexin 3 [Source:RGD Symbol;Acc:2300148]	yes|up	1
ENSRNOG00000011059	Ttbk2	tau tubulin kinase 2 [Source:RGD Symbol;Acc:1311661]	yes|up	1
ENSRNOG00000012620	Syngr3	synaptogyrin 3 [Source:RGD Symbol;Acc:1311801]	yes|up	1
ENSRNOG00000047175	Cryaa	crystallin, alpha A [Source:RGD Symbol;Acc:2413]	yes|down	1
ENSRNOG00000026577	Cpne4	copine 4 [Source:RGD Symbol;Acc:1308844]	yes|up	1
ENSRNOG00000013862	Dusp2	dual specificity phosphatase 2 [Source:RGD Symbol;Acc:1305804]	yes|down	1
ENSRNOG00000012628	Gpr18	G protein-coupled receptor 18 [Source:RGD Symbol;Acc:1304889]	yes|down	1
ENSRNOG00000022893	Rimbp2	RIMS binding protein 2 [Source:RGD Symbol;Acc:708533]	yes|up	1
ENSRNOG00000028250	Lax1	lymphocyte transmembrane adaptor 1 [Source:RGD Symbol;Acc:1563522]	yes|down	1
ENSRNOG00000001816	Rfc4	replication factor C subunit 4 [Source:RGD Symbol;Acc:1310142]	yes|down	1
ENSRNOG00000009588	Snph	syntaphilin [Source:RGD Symbol;Acc:1305867]	yes|up	1
ENSRNOG00000060746	AABR07060994.1		yes|down	1
ENSRNOG00000015055	Scg2	secretogranin II [Source:RGD Symbol;Acc:3626]	yes|up	1
ENSRNOG00000047577	AABR07065656.2		yes|down	1
ENSRNOG00000015051	Golga7b	golgin A7 family, member B [Source:RGD Symbol;Acc:1583839]	yes|up	1
ENSRNOG00000042286	Nsl1	NSL1, MIS12 kinetochore complex component [Source:RGD Symbol;Acc:1562052]	yes|down	1
ENSRNOG00000017869	Irf8	interferon regulatory factor 8 [Source:RGD Symbol;Acc:1312024]	yes|down	1
ENSRNOG00000003720	Prrx1	paired related homeobox 1 [Source:RGD Symbol;Acc:628884]	yes|up	1
ENSRNOG00000033791	Apc2	APC2, WNT signaling pathway regulator [Source:RGD Symbol;Acc:1308256]	yes|up	1
ENSRNOG00000043445	Them5	thioesterase superfamily member 5 [Source:RGD Symbol;Acc:1562059]	yes|up	1
ENSRNOG00000046479	Chaf1a	chromatin assembly factor 1 subunit A [Source:RGD Symbol;Acc:1590865]	yes|down	1
ENSRNOG00000032737	F7	coagulation factor VII [Source:RGD Symbol;Acc:628678]	yes|down	1
ENSRNOG00000016099	Id4	inhibitor of DNA binding 4, HLH protein [Source:RGD Symbol;Acc:631428]	yes|up	1
ENSRNOG00000008941	Ets1	ETS proto-oncogene 1, transcription factor [Source:RGD Symbol;Acc:2583]	yes|down	1
ENSRNOG00000019422	Egr1	early growth response 1 [Source:RGD Symbol;Acc:2544]	yes|up	1
ENSRNOG00000025302	Cdca2	cell division cycle associated 2 [Source:RGD Symbol;Acc:1311003]	yes|down	1
ENSRNOG00000006645	Ryr3	ryanodine receptor 3 [Source:RGD Symbol;Acc:68952]	yes|up	1
ENSRNOG00000019328	Phgdh	phosphoglycerate dehydrogenase [Source:RGD Symbol;Acc:61987]	yes|down	1
ENSRNOG00000002419	Plp1	proteolipid protein 1 [Source:RGD Symbol;Acc:3354]	yes|up	1
ENSRNOG00000045595	Tnfsf9	TNF superfamily member 9 [Source:RGD Symbol;Acc:727974]	yes|down	1
ENSRNOG00000001833	Mcm4	minichromosome maintenance complex component 4 [Source:RGD Symbol;Acc:3060]	yes|down	1
ENSRNOG00000013147	Cacna1d	calcium voltage-gated channel subunit alpha1 D [Source:RGD Symbol;Acc:70973]	yes|up	1
ENSRNOG00000021370	Ccdc69	coiled-coil domain containing 69 [Source:RGD Symbol;Acc:1562251]	yes|down	1
ENSRNOG00000053550	Itga1	integrin subunit alpha 1 [Source:RGD Symbol;Acc:2923]	yes|up	1
ENSRNOG00000024620	Mamdc2	MAM domain containing 2 [Source:MGI Symbol;Acc:MGI:1918988]	yes|up	1
ENSRNOG00000001224	Itgb2	integrin subunit beta 2 [Source:RGD Symbol;Acc:1305581]	yes|down	1
ENSRNOG00000013148	Rad54l	RAD54 like [Source:RGD Symbol;Acc:1310600]	yes|down	1
ENSRNOG00000012393	S100a13	S100 calcium binding protein A13 [Source:RGD Symbol;Acc:1304919]	yes|down	1
ENSRNOG00000004322	Sh3kbp1	SH3 domain-containing kinase-binding protein 1 [Source:RGD Symbol;Acc:620904]	yes|down	1
ENSRNOG00000005936	Foxm1	forkhead box M1 [Source:RGD Symbol;Acc:61807]	yes|down	1
ENSRNOG00000000479	Kifc1	kinesin family member C1 [Source:RGD Symbol;Acc:1359118]	yes|down	1
ENSRNOG00000003787	Lcorl	ligand dependent nuclear receptor corepressor-like [Source:RGD Symbol;Acc:1561241]	yes|up	1
ENSRNOG00000006244	Lztfl1	leucine zipper transcription factor-like 1 [Source:RGD Symbol;Acc:1306628]	yes|up	1
ENSRNOG00000046711	AC128353.1		yes|up	1
ENSRNOG00000026976	AABR07056369.1		yes|down	1
ENSRNOG00000032951	Jsrp1	junctional sarcoplasmic reticulum protein 1 [Source:RGD Symbol;Acc:1596084]	yes|down	1
ENSRNOG00000016978	LOC308990	hypothetical protein LOC308990 [Source:RGD Symbol;Acc:1564503]	yes|down	1
ENSRNOG00000004733	Wdr25	WD repeat domain 25 [Source:RGD Symbol;Acc:1562505]	yes|down	1
ENSRNOG00000007412	Dok1	docking protein 1 [Source:RGD Symbol;Acc:1309499]	yes|down	1
ENSRNOG00000006418	Samhd1	SAM and HD domain containing deoxynucleoside triphosphate triphosphohydrolase 1 [Source:RGD Symbol;Acc:1308369]	yes|down	1
ENSRNOG00000039455	Pcdhgb6	protocadherin gamma subfamily B, 6 [Source:RGD Symbol;Acc:7743693]	yes|up	1
ENSRNOG00000012852	Bin1	bridging integrator 1 [Source:RGD Symbol;Acc:621786]	yes|down	1
ENSRNOG00000021017	Car11	carbonic anhydrase 11 [Source:RGD Symbol;Acc:735155]	yes|up	1
ENSRNOG00000020150	Il18bp	interleukin 18 binding protein [Source:RGD Symbol;Acc:620042]	yes|down	1
ENSRNOG00000006144	Cntn3	contactin 3 [Source:RGD Symbol;Acc:3253]	yes|up	1
ENSRNOG00000014496	Coro6	coronin 6 [Source:RGD Symbol;Acc:708560]	yes|up	1
ENSRNOG00000013916	Nefm	neurofilament medium [Source:RGD Symbol;Acc:3160]	yes|up	1
ENSRNOG00000046021	LOC108348172	proSAAS [Source:RGD Symbol;Acc:11409911]	yes|up	1
ENSRNOG00000013914	Gpr132	G protein-coupled receptor 132 [Source:RGD Symbol;Acc:1310817]	yes|down	1
ENSRNOG00000056037	AABR07034636.1		yes|down	1
ENSRNOG00000015945	Cd3g	CD3g molecule [Source:RGD Symbol;Acc:1307718]	yes|down	1
ENSRNOG00000051986	Plcg2	phospholipase C, gamma 2 [Source:RGD Symbol;Acc:3348]	yes|down	1
ENSRNOG00000006096	Slc26a7	solute carrier family 26 member 7 [Source:RGD Symbol;Acc:1310846]	yes|up	1
ENSRNOG00000012337	Pde1c	phosphodiesterase 1C [Source:RGD Symbol;Acc:68332]	yes|up	1
ENSRNOG00000001608	Nxpe3	neurexophilin and PC-esterase domain family, member 3 [Source:RGD Symbol;Acc:1584648]	yes|down	1
ENSRNOG00000056457	Gpd1	glycerol-3-phosphate dehydrogenase 1 [Source:RGD Symbol;Acc:621381]	yes|down	1
ENSRNOG00000008839	Pparg	peroxisome proliferator-activated receptor gamma [Source:RGD Symbol;Acc:3371]	yes|up	1
ENSRNOG00000028137	Mki67	marker of proliferation Ki-67 [Source:RGD Symbol;Acc:1305476]	yes|down	1
ENSRNOG00000021384	Ankrd44	ankyrin repeat domain 44 [Source:RGD Symbol;Acc:1561893]	yes|down	1
ENSRNOG00000002304	Tnfrsf13b	TNF receptor superfamily member 13B [Source:RGD Symbol;Acc:1595998]	yes|down	1
ENSRNOG00000001785	Etv5	ets variant 5 [Source:RGD Symbol;Acc:1309590]	yes|up	1
ENSRNOG00000006731	Spc25	SPC25, NDC80 kinetochore complex component [Source:RGD Symbol;Acc:1307811]	yes|down	1
ENSRNOG00000029662	Wdfy4	WDFY family member 4 [Source:RGD Symbol;Acc:1564142]	yes|down	1
ENSRNOG00000017307	Prss23	serine protease 23 [Source:RGD Symbol;Acc:1359545]	yes|up	1
ENSRNOG00000021128	Kcnj11	potassium voltage-gated channel subfamily J member 11 [Source:RGD Symbol;Acc:69247]	yes|up	1
ENSRNOG00000020702	Cyb561a3	cytochrome b561 family, member A3 [Source:RGD Symbol;Acc:1304670]	yes|down	1
ENSRNOG00000021795	Fam227a	family with sequence similarity 227, member A [Source:RGD Symbol;Acc:1305939]	yes|up	1
ENSRNOG00000005043	Cpeb2	cytoplasmic polyadenylation element binding protein 2 [Source:RGD Symbol;Acc:1307485]	yes|up	1
ENSRNOG00000001130	Nos1	nitric oxide synthase 1 [Source:RGD Symbol;Acc:3184]	yes|up	1
ENSRNOG00000030418	Tmem47	transmembrane protein 47 [Source:RGD Symbol;Acc:1564799]	yes|up	1
ENSRNOG00000004473	Ppargc1a	PPARG coactivator 1 alpha [Source:RGD Symbol;Acc:620925]	yes|up	1
ENSRNOG00000005825	Lyz2	lysozyme 2 [Source:RGD Symbol;Acc:3026]	yes|down	1
ENSRNOG00000020849	Hcst	hematopoietic cell signal transducer [Source:RGD Symbol;Acc:1359238]	yes|down	1
ENSRNOG00000050111	Cenpo	centromere protein O [Source:RGD Symbol;Acc:1590328]	yes|down	1
ENSRNOG00000028043	Cxcl3	chemokine (C-X-C motif) ligand 3 [Source:RGD Symbol;Acc:621812]	yes|down	1
ENSRNOG00000030316	Otogl	otogelin-like [Source:RGD Symbol;Acc:1589018]	yes|up	1
ENSRNOG00000013042	Htr1b	5-hydroxytryptamine receptor 1B [Source:RGD Symbol;Acc:2846]	yes|up	1
ENSRNOG00000012008	S100a3	S100 calcium binding protein A3 [Source:RGD Symbol;Acc:620260]	yes|down	1
ENSRNOG00000021555	Mis18a	MIS18 kinetochore protein A [Source:RGD Symbol;Acc:1310778]	yes|down	1
ENSRNOG00000027894	Iqgap3	IQ motif containing GTPase activating protein 3 [Source:RGD Symbol;Acc:1305951]	yes|down	1
ENSRNOG00000028624	Kif26b	kinesin family member 26B [Source:RGD Symbol;Acc:1560022]	yes|up	1
ENSRNOG00000001861	Ydjc	YdjC chitooligosaccharide deacetylase homolog [Source:RGD Symbol;Acc:1359227]	yes|down	1
ENSRNOG00000016888	Pask	PAS domain containing serine/threonine kinase [Source:RGD Symbol;Acc:1306146]	yes|down	1
ENSRNOG00000009907	Mmp8	matrix metallopeptidase 8 [Source:RGD Symbol;Acc:631408]	yes|down	1
ENSRNOG00000053891	AABR07018078.1	PHD finger protein 11 [Source:NCBI gene;Acc:361051]	yes|down	1
ENSRNOG00000024210	Nlrc3	NLR family, CARD domain containing 3 [Source:RGD Symbol;Acc:1304902]	yes|down	1
ENSRNOG00000057880	Myh11	myosin heavy chain 11 [Source:RGD Symbol;Acc:3136]	yes|up	1
ENSRNOG00000037852	Pirt	phosphoinositide-interacting regulator of transient receptor potential channels [Source:RGD Symbol;Acc:1565284]	yes|up	1
ENSRNOG00000051383	Srsf12	serine and arginine rich splicing factor 12 [Source:RGD Symbol;Acc:1561162]	yes|down	1
ENSRNOG00000004899	Kcns3	potassium voltage-gated channel, modifier subfamily S, member 3 [Source:RGD Symbol;Acc:621527]	yes|up	1
ENSRNOG00000054217	Runx3	runt-related transcription factor 3 [Source:RGD Symbol;Acc:620082]	yes|down	1
ENSRNOG00000009919	Acod1	aconitate decarboxylase 1 [Source:RGD Symbol;Acc:1563454]	yes|down	1
ENSRNOG00000027944	Pnma8a	PNMA family member 8A [Source:RGD Symbol;Acc:1310803]	yes|up	1
ENSRNOG00000009505	Cd164l2	CD164 molecule like 2 [Source:RGD Symbol;Acc:2323068]	yes|down	1
ENSRNOG00000009503	Depdc1	DEP domain containing 1 [Source:RGD Symbol;Acc:1306987]	yes|down	1
ENSRNOG00000027940	Plppr3	phospholipid phosphatase related 3 [Source:RGD Symbol;Acc:727823]	yes|up	1
ENSRNOG00000002126	Ncam2	neural cell adhesion molecule 2 [Source:RGD Symbol;Acc:1303131]	yes|up	1
ENSRNOG00000009910	Swap70	switching B-cell complex subunit SWAP70 [Source:RGD Symbol;Acc:1305579]	yes|down	1
ENSRNOG00000009912	Fgr	FGR proto-oncogene, Src family tyrosine kinase [Source:RGD Symbol;Acc:621319]	yes|down	1
ENSRNOG00000009260	Cnr2	cannabinoid receptor 2 [Source:RGD Symbol;Acc:619713]	yes|down	1
ENSRNOG00000021724	Ptprcap	protein tyrosine phosphatase, receptor type, C-associated protein [Source:RGD Symbol;Acc:1559601]	yes|down	1
ENSRNOG00000013213	Epha4	Eph receptor A4 [Source:RGD Symbol;Acc:1560587]	yes|up	1
ENSRNOG00000014532	Lbp	lipopolysaccharide binding protein [Source:RGD Symbol;Acc:61865]	yes|down	1
ENSRNOG00000009691	Lrrn2	leucine rich repeat neuronal 2 [Source:RGD Symbol;Acc:1305482]	yes|up	1
ENSRNOG00000053626	AABR07058955.1		yes|down	1
ENSRNOG00000005700	Nsg1	neuronal vesicle trafficking associated 1 [Source:RGD Symbol;Acc:2222]	yes|up	1
ENSRNOG00000054286	Rrm2	ribonucleotide reductase regulatory subunit M2 [Source:RGD Symbol;Acc:1598310]	yes|down	1
ENSRNOG00000005250	Abcg5	ATP binding cassette subfamily G member 5 [Source:RGD Symbol;Acc:620298]	yes|down	1
ENSRNOG00000027098	Sez6l2	seizure related 6 homolog like 2 [Source:RGD Symbol;Acc:1565281]	yes|up	1
ENSRNOG00000018960	AABR07001382.1	spectrin repeat containing nuclear envelope protein 1 [Source:NCBI gene;Acc:499010]	yes|up	1
ENSRNOG00000010545	Mrap2	melanocortin 2 receptor accessory protein 2 [Source:RGD Symbol;Acc:1309873]	yes|down	1
ENSRNOG00000027096	Ctsw	cathepsin W [Source:RGD Symbol;Acc:1309354]	yes|down	1
ENSRNOG00000003972	Tshr	thyroid stimulating hormone receptor [Source:RGD Symbol;Acc:3911]	yes|up	1
ENSRNOG00000003977	Dusp1	dual specificity phosphatase 1 [Source:RGD Symbol;Acc:620897]	yes|up	1
ENSRNOG00000010665	Ccr7	C-C motif chemokine receptor 7 [Source:RGD Symbol;Acc:735151]	yes|down	1
ENSRNOG00000010666	Ccn5	cellular communication network factor 5 [Source:RGD Symbol;Acc:621867]	yes|down	1
ENSRNOG00000049749	LOC100911917	mediator of RNA polymerase II transcription subunit 22-like [Source:RGD Symbol;Acc:6489628]	yes|up	1
ENSRNOG00000004150	Slc9a7	solute carrier family 9 member A7 [Source:RGD Symbol;Acc:1561385]	yes|down	1
ENSRNOG00000049299	AABR07051532.2		yes|down	1
ENSRNOG00000031202	Trim30c	tripartite motif-containing 30C [Source:RGD Symbol;Acc:1566132]	yes|down	1
ENSRNOG00000004158	Hdac9	histone deacetylase 9 [Source:RGD Symbol;Acc:1310748]	yes|down	1
ENSRNOG00000046744	Ankrd29	ankyrin repeat domain 29 [Source:RGD Symbol;Acc:1587260]	yes|up	1
ENSRNOG00000038740	Gimap7	GTPase, IMAP family member 7 [Source:RGD Symbol;Acc:1565750]	yes|down	1
ENSRNOG00000010065	Dgkh	diacylglycerol kinase, eta [Source:RGD Symbol;Acc:1561955]	yes|up	1
ENSRNOG00000042499	LOC100364435	thymosin, beta 10-like [Source:RGD Symbol;Acc:2321025]	yes|down	1
ENSRNOG00000046936	AABR07051673.1		yes|down	1
ENSRNOG00000016872	Plppr4	phospholipid phosphatase related 4 [Source:RGD Symbol;Acc:727806]	yes|up	1
ENSRNOG00000010146	Ndn	necdin, MAGE family member [Source:RGD Symbol;Acc:1310526]	yes|up	1
ENSRNOG00000006940	Ncf4	neutrophil cytosolic factor 4 [Source:RGD Symbol;Acc:1593157]	yes|down	1
ENSRNOG00000016977	Calb2	calbindin 2 [Source:RGD Symbol;Acc:620981]	yes|up	1
ENSRNOG00000053945	Daam2	dishevelled associated activator of morphogenesis 2 [Source:RGD Symbol;Acc:1306128]	yes|up	1
ENSRNOG00000016971	Zfp612	zinc finger protein 612 [Source:RGD Symbol;Acc:1307197]	yes|up	1
ENSRNOG00000020444	Hcn3	hyperpolarization-activated cyclic nucleotide-gated potassium channel 3 [Source:RGD Symbol;Acc:620691]	yes|up	1
ENSRNOG00000006957	Gria4	glutamate ionotropic receptor AMPA type subunit 4 [Source:RGD Symbol;Acc:61863]	yes|up	1
ENSRNOG00000015616	Rgs14	regulator of G-protein signaling 14 [Source:RGD Symbol;Acc:620003]	yes|down	1
ENSRNOG00000006952	Prex1	phosphatidylinositol-3,4,5-trisphosphate-dependent Rac exchange factor 1 [Source:RGD Symbol;Acc:1306534]	yes|down	1
ENSRNOG00000015614	Ppp1r16b	protein phosphatase 1, regulatory subunit 16B [Source:RGD Symbol;Acc:1589460]	yes|down	1
ENSRNOG00000002525	Ptgs2	prostaglandin-endoperoxide synthase 2 [Source:RGD Symbol;Acc:620349]	yes|up	1
ENSRNOG00000010248	Serpini1	serpin family I member 1 [Source:RGD Symbol;Acc:619896]	yes|up	1
ENSRNOG00000004479	Aurka	aurora kinase A [Source:RGD Symbol;Acc:628895]	yes|down	1
ENSRNOG00000015438	Ces1c	carboxylesterase 1C [Source:RGD Symbol;Acc:2571]	yes|up	1
ENSRNOG00000062101	Ace	angiotensin I converting enzyme [Source:RGD Symbol;Acc:2493]	yes|up	1
ENSRNOG00000009131	Zc3h12a	zinc finger CCCH type containing 12A [Source:RGD Symbol;Acc:1306776]	yes|down	1
ENSRNOG00000004470	Il24	interleukin 24 [Source:RGD Symbol;Acc:621484]	yes|down	1
ENSRNOG00000015538	Abcd2	ATP binding cassette subfamily D member 2 [Source:RGD Symbol;Acc:69244]	yes|up	1
ENSRNOG00000010320	Efnb3	ephrin B3 [Source:RGD Symbol;Acc:2541]	yes|down	1
ENSRNOG00000001528	Gap43	growth associated protein 43 [Source:RGD Symbol;Acc:62071]	yes|up	1
ENSRNOG00000011624	Kcnq2	potassium voltage-gated channel subfamily Q member 2 [Source:RGD Symbol;Acc:621504]	yes|up	1
ENSRNOG00000011623	Rab3c	RAB3C, member RAS oncogene family [Source:RGD Symbol;Acc:620923]	yes|up	1
ENSRNOG00000029055	Ttk	Ttk protein kinase [Source:RGD Symbol;Acc:1305558]	yes|down	1
ENSRNOG00000002950	Lyl1	LYL1, basic helix-loop-helix family member [Source:RGD Symbol;Acc:1359244]	yes|down	1
ENSRNOG00000003890	Nap1l1	nucleosome assembly protein 1-like 1 [Source:RGD Symbol;Acc:71094]	yes|down	1
ENSRNOG00000049517	Tnfaip3	TNF alpha induced protein 3 [Source:RGD Symbol;Acc:1589275]	yes|down	1
ENSRNOG00000011305	Sox10	SRY box 10 [Source:RGD Symbol;Acc:3735]	yes|up	1
ENSRNOG00000039183	Cip2a	cell proliferation regulating inhibitor of protein phosphatase 2A [Source:RGD Symbol;Acc:1310335]	yes|down	1
ENSRNOG00000025925	Txk	TXK tyrosine kinase [Source:RGD Symbol;Acc:1306481]	yes|down	1
ENSRNOG00000051499	Tcf3	transcription factor 3 [Source:RGD Symbol;Acc:620914]	yes|down	1
ENSRNOG00000018217	Syt5	synaptotagmin 5 [Source:RGD Symbol;Acc:3806]	yes|up	1
ENSRNOG00000005410	Cdca7l	cell division cycle associated 7 like [Source:RGD Symbol;Acc:1564080]	yes|down	1
ENSRNOG00000027365	Hoxa4	homeo box A4 [Source:RGD Symbol;Acc:2814]	yes|up	1
ENSRNOG00000023230	RGD1307621	hypothetical LOC314168 [Source:RGD Symbol;Acc:1307621]	yes|up	1
ENSRNOG00000017690	Ccsap	centriole, cilia and spindle-associated protein [Source:RGD Symbol;Acc:1563235]	yes|down	1
ENSRNOG00000047781	Slc25a23	solute carrier family 25 member 23 [Source:RGD Symbol;Acc:1588586]	yes|up	1
ENSRNOG00000019894	Izumo1r	IZUMO1 receptor, JUNO [Source:RGD Symbol;Acc:1585174]	yes|down	1
ENSRNOG00000003802	Pttg1	pituitary tumor-transforming 1 [Source:RGD Symbol;Acc:68359]	yes|down	1
ENSRNOG00000019451	Smtn	smoothelin [Source:RGD Symbol;Acc:1310216]	yes|up	1
ENSRNOG00000004147	Abca8a	ATP-binding cassette, subfamily A (ABC1), member 8a [Source:RGD Symbol;Acc:1307333]	yes|up	1
ENSRNOG00000055300	Ncapd2	non-SMC condensin I complex, subunit D2 [Source:RGD Symbol;Acc:1562596]	yes|down	1
ENSRNOG00000000316	Sobp	sine oculis binding protein homolog [Source:RGD Symbol;Acc:1560479]	yes|up	1
ENSRNOG00000016308	Il10ra	interleukin 10 receptor subunit alpha [Source:RGD Symbol;Acc:620138]	yes|down	1
ENSRNOG00000033134	Mef2c	myocyte enhancer factor 2C [Source:RGD Symbol;Acc:1563119]	yes|down	1
ENSRNOG00000013564	Dok3	docking protein 3 [Source:RGD Symbol;Acc:1311840]	yes|down	1
ENSRNOG00000045947	Acsbg2	acyl-CoA synthetase bubblegum family member 2 [Source:RGD Symbol;Acc:1588580]	yes|up	1
ENSRNOG00000019163	Syt6	synaptotagmin 6 [Source:RGD Symbol;Acc:62012]	yes|up	1
ENSRNOG00000011917	Cd79b	CD79b molecule [Source:RGD Symbol;Acc:620012]	yes|down	1
ENSRNOG00000016654	Galr1	galanin receptor 1 [Source:RGD Symbol;Acc:2656]	yes|up	1
ENSRNOG00000017622	Npm3	nucleophosmin/nucleoplasmin, 3 [Source:RGD Symbol;Acc:1565542]	yes|down	1
ENSRNOG00000009198	Rab6b	RAB6B, member RAS oncogene family [Source:RGD Symbol;Acc:1309958]	yes|up	1
ENSRNOG00000014135	Rab11fip4	RAB11 family interacting protein 4 [Source:RGD Symbol;Acc:1305063]	yes|down	1
ENSRNOG00000056981	AABR07034956.1		yes|down	1
ENSRNOG00000016623	Tmeff2	transmembrane protein with EGF-like and two follistatin-like domains 2 [Source:RGD Symbol;Acc:1308839]	yes|up	1
ENSRNOG00000001376	Mettl7a	methyltransferase like 7A [Source:RGD Symbol;Acc:1308407]	yes|up	1
ENSRNOG00000031997	Ttll7	tubulin tyrosine ligase like 7 [Source:NCBI gene;Acc:310982]	yes|up	1
ENSRNOG00000004378	Abca5	ATP binding cassette subfamily A member 5 [Source:RGD Symbol;Acc:628661]	yes|up	1
ENSRNOG00000047635	Tmem178b	transmembrane protein 178B [Source:RGD Symbol;Acc:1585938]	yes|up	1
ENSRNOG00000031852	Lsamp	limbic system-associated membrane protein [Source:RGD Symbol;Acc:71102]	yes|up	1
ENSRNOG00000060528	Cacna1g	calcium voltage-gated channel subunit alpha1 G [Source:RGD Symbol;Acc:68942]	yes|up	1
ENSRNOG00000008121	Slc13a1	solute carrier family 13 member 1 [Source:RGD Symbol;Acc:61919]	yes|up	1
ENSRNOG00000002730	Rgs5	regulator of G-protein signaling 5 [Source:RGD Symbol;Acc:3568]	yes|up	1
ENSRNOG00000000547	Tspyl4	TSPY-like 4 [Source:RGD Symbol;Acc:1306653]	yes|up	1
ENSRNOG00000018669	Jak3	Janus kinase 3 [Source:RGD Symbol;Acc:2940]	yes|down	1
ENSRNOG00000011054	Laptm5	lysosomal protein transmembrane 5 [Source:RGD Symbol;Acc:621838]	yes|down	1
ENSRNOG00000003800	Rgs9	regulator of G-protein signaling 9 [Source:RGD Symbol;Acc:3572]	yes|up	1
ENSRNOG00000042374	Tgif2	TGFB-induced factor homeobox 2 [Source:RGD Symbol;Acc:1560115]	yes|down	1
ENSRNOG00000011754	Myom2	myomesin 2 [Source:RGD Symbol;Acc:631437]	yes|up	1
ENSRNOG00000026669	RT1-Ha	RT1 class II, locus Ha [Source:RGD Symbol;Acc:1595921]	yes|down	1
ENSRNOG00000061216	Tubb5	tubulin, beta 5 class I [Source:RGD Symbol;Acc:628596]	yes|down	1
ENSRNOG00000019719	Kcna5	potassium voltage-gated channel subfamily A member 5 [Source:RGD Symbol;Acc:2953]	yes|up	1
ENSRNOG00000052789	AABR07044562.1		yes|down	1
ENSRNOG00000026705	Dgki	diacylglycerol kinase, iota [Source:RGD Symbol;Acc:735049]	yes|up	1
ENSRNOG00000048159	AABR07065778.3		yes|down	1
ENSRNOG00000033680	Cyp2b1	cytochrome P450, family 2, subfamily b, polypeptide 1 [Source:RGD Symbol;Acc:2466]	yes|up	1
ENSRNOG00000018784	Jph3	junctophilin 3 [Source:RGD Symbol;Acc:1308416]	yes|up	1
ENSRNOG00000033912	Fcho1	FCH domain only 1 [Source:RGD Symbol;Acc:1307683]	yes|down	1
ENSRNOG00000048230	AABR07056118.1	Rattus norvegicus [Source:RefSeq mRNA;Acc:NM_001013952]	yes|down	1
ENSRNOG00000019387	Ifi30	IFI30, lysosomal thiol reductase [Source:RGD Symbol;Acc:1310758]	yes|down	1
ENSRNOG00000038881	Hcls1	hematopoietic cell specific Lyn substrate 1 [Source:RGD Symbol;Acc:1304754]	yes|down	1
ENSRNOG00000060984	Dnah7	dynein, axonemal, heavy chain 7 [Source:RGD Symbol;Acc:621798]	yes|up	1
ENSRNOG00000008012	Abcb4	ATP binding cassette subfamily B member 4 [Source:RGD Symbol;Acc:620248]	yes|up	1
ENSRNOG00000008010	Hoxb5	homeo box B5 [Source:RGD Symbol;Acc:1562292]	yes|up	1
ENSRNOG00000004207	Eml5	EMAP like 5 [Source:RGD Symbol;Acc:1303275]	yes|up	1
ENSRNOG00000008015	Fos	Fos proto-oncogene, AP-1 transcription factor subunit [Source:RGD Symbol;Acc:2626]	yes|up	1
ENSRNOG00000049829	AABR07060872.1		yes|down	1
ENSRNOG00000022784	Fzd10	frizzled class receptor 10 [Source:RGD Symbol;Acc:1583825]	yes|up	1
ENSRNOG00000008394	Prg2	proteoglycan 2 [Source:RGD Symbol;Acc:69336]	yes|down	1
ENSRNOG00000055620	AABR07065768.3		yes|down	1
ENSRNOG00000003703	Mcm6	minichromosome maintenance complex component 6 [Source:RGD Symbol;Acc:61967]	yes|down	1
ENSRNOG00000003069	Cd38	CD38 molecule [Source:RGD Symbol;Acc:2303]	yes|down	1
ENSRNOG00000012098	Adcyap1r1	ADCYAP receptor type 1 [Source:RGD Symbol;Acc:2038]	yes|up	1
ENSRNOG00000003064	Bst1	bone marrow stromal cell antigen 1 [Source:RGD Symbol;Acc:620344]	yes|down	1
ENSRNOG00000026203	Pax8	paired box 8 [Source:RGD Symbol;Acc:620434]	yes|up	1
ENSRNOG00000016575	Tnfrsf1b	TNF receptor superfamily member 1B [Source:RGD Symbol;Acc:621238]	yes|down	1
ENSRNOG00000003709	Kmo	kynurenine 3-monooxygenase [Source:RGD Symbol;Acc:620610]	yes|down	1
ENSRNOG00000022760	Rubcnl	rubicon like autophagy regulator [Source:RGD Symbol;Acc:1304929]	yes|down	1
ENSRNOG00000012874	Rgma	repulsive guidance molecule BMP co-receptor a [Source:RGD Symbol;Acc:1311983]	yes|up	1
ENSRNOG00000060179	Gpc3	glypican 3 [Source:RGD Symbol;Acc:2725]	yes|up	1
ENSRNOG00000023614	Hsh2d	hematopoietic SH2 domain containing [Source:RGD Symbol;Acc:2321939]	yes|down	1
ENSRNOG00000028768	Gbp4	guanylate binding protein 4 [Source:RGD Symbol;Acc:1310579]	yes|down	1
ENSRNOG00000045752	Rrm1	ribonucleotide reductase catalytic subunit M1 [Source:RGD Symbol;Acc:1592569]	yes|down	1
ENSRNOG00000033330	Skida1	SKI/DACH domain containing 1 [Source:MGI Symbol;Acc:MGI:1919918]	yes|up	1
ENSRNOG00000007679	Cyth4	cytohesin 4 [Source:RGD Symbol;Acc:1564842]	yes|down	1
ENSRNOG00000017874	Cd53	Cd53 molecule [Source:RGD Symbol;Acc:2310]	yes|down	1
ENSRNOG00000008656	Snca	synuclein alpha [Source:RGD Symbol;Acc:3729]	yes|up	1
ENSRNOG00000022261	Cenpu	centromere protein U [Source:RGD Symbol;Acc:1562566]	yes|down	1
ENSRNOG00000007896	Klhl38	kelch-like family member 38 [Source:RGD Symbol;Acc:1564169]	yes|up	1
ENSRNOG00000001807	Sspn	sarcospan [Source:RGD Symbol;Acc:1559723]	yes|up	1
ENSRNOG00000007178	Cd8a	CD8a molecule [Source:RGD Symbol;Acc:2316]	yes|down	1
ENSRNOG00000019174	Chtf18	chromosome transmission fidelity factor 18 [Source:RGD Symbol;Acc:1310473]	yes|down	1
ENSRNOG00000047545	Adra2a	adrenoceptor alpha 2A [Source:RGD Symbol;Acc:2056]	yes|up	1
ENSRNOG00000046366	Dmd	dystrophin [Source:RGD Symbol;Acc:2507]	yes|up	1
ENSRNOG00000047077	LOC681182	similar to paired immunoglobin-like type 2 receptor beta [Source:RGD Symbol;Acc:1583509]	yes|down	1
ENSRNOG00000021269	Chgb	chromogranin B [Source:RGD Symbol;Acc:2339]	yes|up	1
ENSRNOG00000022283	Lhfpl5	LHFPL tetraspan subfamily member 5 [Source:RGD Symbol;Acc:1359370]	yes|up	1
ENSRNOG00000002540	Rhoh	ras homolog family member H [Source:RGD Symbol;Acc:1307623]	yes|down	1
ENSRNOG00000019433	Rab3a	RAB3A, member RAS oncogene family [Source:RGD Symbol;Acc:3528]	yes|up	1
ENSRNOG00000021260	Prnd	prion like protein doppel [Source:RGD Symbol;Acc:1306618]	yes|down	1
ENSRNOG00000026518	Tmem156	transmembrane protein 156 [Source:RGD Symbol;Acc:1562424]	yes|down	1
ENSRNOG00000015878	Pif1	PIF1 5'-to-3' DNA helicase [Source:RGD Symbol;Acc:1586053]	yes|down	1
ENSRNOG00000043513	Cyp4x1	cytochrome P450, family 4, subfamily x, polypeptide 1 [Source:RGD Symbol;Acc:628719]	yes|up	1
ENSRNOG00000015042	Cysltr2	cysteinyl leukotriene receptor 2 [Source:RGD Symbol;Acc:619797]	yes|down	1
ENSRNOG00000013774	Lmnb1	lamin B1 [Source:RGD Symbol;Acc:620522]	yes|down	1
ENSRNOG00000012482	Ndrg4	NDRG family member 4 [Source:RGD Symbol;Acc:621593]	yes|up	1
ENSRNOG00000022110	Gcsam	germinal center-associated, signaling and motility [Source:RGD Symbol;Acc:1591321]	yes|down	1
ENSRNOG00000047314	Tk1	thymidine kinase 1 [Source:RGD Symbol;Acc:621014]	yes|down	1
ENSRNOG00000021468	Grm8	glutamate metabotropic receptor 8 [Source:RGD Symbol;Acc:619858]	yes|up	1
ENSRNOG00000013679	Sema4d	semaphorin 4D [Source:RGD Symbol;Acc:1310554]	yes|down	1
ENSRNOG00000021463	Ppara	peroxisome proliferator activated receptor alpha [Source:RGD Symbol;Acc:3369]	yes|up	1
ENSRNOG00000006557	Cyfip2	cytoplasmic FMR1 interacting protein 2 [Source:RGD Symbol;Acc:1305048]	yes|down	1
ENSRNOG00000008570	Cadps	calcium dependent secretion activator [Source:RGD Symbol;Acc:708573]	yes|up	1
ENSRNOG00000055411	AC128836.1		yes|down	1
ENSRNOG00000006314	Zbp1	Z-DNA binding protein 1 [Source:RGD Symbol;Acc:619956]	yes|down	1
ENSRNOG00000022163	LOC102555023	uncharacterized LOC102555023 [Source:RGD Symbol;Acc:7527767]	yes|down	1
ENSRNOG00000000441	Gpsm3	G-protein signaling modulator 3 [Source:RGD Symbol;Acc:1303014]	yes|down	1
ENSRNOG00000042156	AABR07017874.1		yes|down	1
ENSRNOG00000016306	Adgrv1	adhesion G protein-coupled receptor V1 [Source:RGD Symbol;Acc:1562101]	yes|down	1
ENSRNOG00000059876	Fsd1l	fibronectin type III and SPRY domain containing 1-like [Source:RGD Symbol;Acc:1564809]	yes|up	1
ENSRNOG00000036834	Gpr84	G protein-coupled receptor 84 [Source:RGD Symbol;Acc:1585277]	yes|down	1
ENSRNOG00000056209	Exo1	exonuclease 1 [Source:RGD Symbol;Acc:1309465]	yes|down	1
ENSRNOG00000025115	Exph5	exophilin 5 [Source:RGD Symbol;Acc:1560308]	yes|up	1
ENSRNOG00000047848	Cbr1	carbonyl reductase 1 [Source:RGD Symbol;Acc:2286]	yes|up	1
ENSRNOG00000007951	Galnt14	polypeptide N-acetylgalactosaminyltransferase 14 [Source:RGD Symbol;Acc:1310068]	yes|down	1
ENSRNOG00000058916	Ccdc65	coiled-coil domain containing 65 [Source:RGD Symbol;Acc:1595842]	yes|up	1
ENSRNOG00000006426	Syt1	synaptotagmin 1 [Source:RGD Symbol;Acc:3803]	yes|up	1
ENSRNOG00000003209	Pcp4l1	Purkinje cell protein 4-like 1 [Source:RGD Symbol;Acc:1593809]	yes|up	1
ENSRNOG00000006037	Snap25	synaptosomal-associated protein 25 [Source:MGI Symbol;Acc:MGI:98331]	yes|up	1
ENSRNOG00000055518	AABR07024303.1		yes|down	1
ENSRNOG00000007542	Scg5	secretogranin V [Source:RGD Symbol;Acc:3669]	yes|up	1
ENSRNOG00000001333	Azgp1	alpha-2-glycoprotein 1, zinc-binding [Source:RGD Symbol;Acc:2187]	yes|up	1
ENSRNOG00000053812	LOC103689947	selenium-binding protein 1 [Source:RGD Symbol;Acc:9292945]	yes|up	1
ENSRNOG00000020148	Il4i1	interleukin 4 induced 1 [Source:RGD Symbol;Acc:1304831]	yes|down	1
ENSRNOG00000056436	AABR07072028.1		yes|down	1
ENSRNOG00000046036	Itprip	inositol 1,4,5-trisphosphate receptor interacting protein [Source:RGD Symbol;Acc:6488464]	yes|down	1
ENSRNOG00000053406	Gramd1c	GRAM domain containing 1C [Source:RGD Symbol;Acc:1305433]	yes|up	1
ENSRNOG00000056338	AABR07058884.1		yes|down	1
ENSRNOG00000046635	Cdca5	cell division cycle associated 5 [Source:RGD Symbol;Acc:1560863]	yes|down	1
ENSRNOG00000021090	Pygm	glycogen phosphorylase, muscle associated [Source:RGD Symbol;Acc:3461]	yes|up	1
ENSRNOG00000056448	AABR07062033.1		yes|down	1
ENSRNOG00000056446	Endou	endonuclease, poly(U)-specific [Source:RGD Symbol;Acc:1593011]	yes|down	1
ENSRNOG00000016628	Scgn	secretagogin, EF-hand calcium binding protein [Source:RGD Symbol;Acc:1303281]	yes|up	1
ENSRNOG00000021098	Rasgrp2	RAS guanyl releasing protein 2 [Source:RGD Symbol;Acc:1311630]	yes|down	1
ENSRNOG00000042702	Nipa1	NIPA magnesium transporter 1 [Source:NCBI gene;Acc:308668]	yes|up	1
ENSRNOG00000003241	Gabrg2	gamma-aminobutyric acid type A receptor gamma 2 subunit [Source:RGD Symbol;Acc:61966]	yes|up	1
ENSRNOG00000011841	Map2	microtubule-associated protein 2 [Source:RGD Symbol;Acc:3044]	yes|up	1
ENSRNOG00000002331	Aldh3a1	aldehyde dehydrogenase 3 family, member A1 [Source:RGD Symbol;Acc:2088]	yes|down	1
ENSRNOG00000021130	Abcc8	ATP binding cassette subfamily C member 8 [Source:RGD Symbol;Acc:3786]	yes|up	1
ENSRNOG00000021644	Slc15a3	solute carrier family 15 member 3 [Source:RGD Symbol;Acc:628663]	yes|down	1
ENSRNOG00000024457	Cyct	cytochrome c, testis [Source:RGD Symbol;Acc:2452]	yes|up	1
ENSRNOG00000015921	Esco2	establishment of sister chromatid cohesion N-acetyltransferase 2 [Source:RGD Symbol;Acc:1593313]	yes|down	1
ENSRNOG00000013428	Atp6v0a4	ATPase H+ transporting V0 subunit a4 [Source:RGD Symbol;Acc:1305055]	yes|up	1
ENSRNOG00000013294	Sh2d2a	SH2 domain containing 2A [Source:RGD Symbol;Acc:1303076]	yes|down	1
ENSRNOG00000056565	AABR07059002.1		yes|up	1
ENSRNOG00000057096	Gnai1	G protein subunit alpha i1 [Source:RGD Symbol;Acc:2713]	yes|up	1
ENSRNOG00000001143	Cit	citron rho-interacting serine/threonine kinase [Source:RGD Symbol;Acc:70878]	yes|down	1
ENSRNOG00000053301	LOC685767	similar to OX-2 membrane glycoprotein precursor (MRC OX-2 antigen) (CD200 antigen) [Source:RGD Symbol;Acc:1590201]	yes|up	1
ENSRNOG00000021303	Drc3	dynein regulatory complex subunit 3 [Source:RGD Symbol;Acc:1309150]	yes|up	1
ENSRNOG00000030814	Kb23	type II keratin 23 [Source:RGD Symbol;Acc:1303024]	yes|up	1
ENSRNOG00000020281	Kif22	kinesin family member 22 [Source:RGD Symbol;Acc:1311886]	yes|down	1
ENSRNOG00000005038	Ube2t	ubiquitin-conjugating enzyme E2T [Source:RGD Symbol;Acc:1310816]	yes|down	1
ENSRNOG00000017136	Syt17	synaptotagmin 17 [Source:RGD Symbol;Acc:708576]	yes|up	1
ENSRNOG00000051929	Phox2b	paired-like homeobox 2b [Source:RGD Symbol;Acc:1560582]	yes|up	1
ENSRNOG00000003330	Acsf2	acyl-CoA synthetase family member 2 [Source:RGD Symbol;Acc:1562656]	yes|up	1
ENSRNOG00000057556	Pdzrn3	PDZ domain containing RING finger 3 [Source:RGD Symbol;Acc:1305250]	yes|up	1
ENSRNOG00000003336	Mybph	myosin binding protein H [Source:RGD Symbol;Acc:620287]	yes|down	1
ENSRNOG00000030246	Btla	B and T lymphocyte associated [Source:RGD Symbol;Acc:1303280]	yes|down	1
ENSRNOG00000051002	RT1-DMb	RT1 class II, locus DMb [Source:RGD Symbol;Acc:735096]	yes|down	1
ENSRNOG00000017020	Inpp5d	inositol polyphosphate-5-phosphatase D [Source:RGD Symbol;Acc:2914]	yes|down	1
ENSRNOG00000042649	A4gnt	alpha-1,4-N-acetylglucosaminyltransferase [Source:RGD Symbol;Acc:1590210]	yes|up	1
ENSRNOG00000007839	Slc16a7	solute carrier family 16 member 7 [Source:RGD Symbol;Acc:3691]	yes|up	1
ENSRNOG00000013057	Prc1	protein regulator of cytokinesis 1 [Source:RGD Symbol;Acc:1311754]	yes|down	1
ENSRNOG00000028636	Xkr5	XK related 5 [Source:RGD Symbol;Acc:1359335]	yes|down	1
ENSRNOG00000029881	Clec4m	C-type lectin domain family 4 member M [Source:RGD Symbol;Acc:1561466]	yes|down	1
ENSRNOG00000017568	Rit2	Ras-like without CAAX 2 [Source:RGD Symbol;Acc:1307654]	yes|up	1
ENSRNOG00000053272	Chi3l1	chitinase 3 like 1 [Source:RGD Symbol;Acc:620874]	yes|down	1
ENSRNOG00000029889	Clca4	chloride channel accessory 4 [Source:RGD Symbol;Acc:1303234]	yes|down	1
ENSRNOG00000017208	Cspg4	chondroitin sulfate proteoglycan 4 [Source:RGD Symbol;Acc:619942]	yes|up	1
ENSRNOG00000017209	Tubb3	tubulin, beta 3 class III [Source:RGD Symbol;Acc:628595]	yes|up	1
ENSRNOG00000009209	Slitrk1	SLIT and NTRK-like family, member 1 [Source:RGD Symbol;Acc:1308858]	yes|up	1
ENSRNOG00000015691	Inka2	inka box actin regulator 2 [Source:RGD Symbol;Acc:1306526]	yes|up	1
ENSRNOG00000005620	Lcp2	lymphocyte cytosolic protein 2 [Source:RGD Symbol;Acc:619743]	yes|down	1
ENSRNOG00000005960	RGD1311744	similar to RIKEN cDNA 5830475I06 [Source:RGD Symbol;Acc:1311744]	yes|up	1
ENSRNOG00000027253	Pcdhga10	protocadherin gamma subfamily A, 10 [Source:MGI Symbol;Acc:MGI:1935227]	yes|up	1
ENSRNOG00000005780	Adamts13	ADAM metallopeptidase with thrombospondin type 1 motif, 13 [Source:RGD Symbol;Acc:1311594]	yes|down	1
ENSRNOG00000004863	Mpped2	metallophosphoesterase domain containing 2 [Source:RGD Symbol;Acc:735060]	yes|up	1
ENSRNOG00000004860	Myh9	myosin, heavy chain 9 [Source:RGD Symbol;Acc:3140]	yes|down	1
ENSRNOG00000054204	Gria2	glutamate ionotropic receptor AMPA type subunit 2 [Source:RGD Symbol;Acc:61862]	yes|up	1
ENSRNOG00000005968	Hoxa2	homeobox A2 [Source:RGD Symbol;Acc:11468112]	yes|up	1
ENSRNOG00000030101	Traip	TRAF-interacting protein [Source:RGD Symbol;Acc:1309761]	yes|down	1
ENSRNOG00000008157	Syn2	synapsin II [Source:RGD Symbol;Acc:3798]	yes|up	1
ENSRNOG00000012439	Bid	BH3 interacting domain death agonist [Source:RGD Symbol;Acc:620160]	yes|down	1
ENSRNOG00000057701	Myom1	myomesin 1 [Source:RGD Symbol;Acc:631436]	yes|up	1
ENSRNOG00000018358	Nt5dc2	5'-nucleotidase domain containing 2 [Source:RGD Symbol;Acc:1305524]	yes|down	1
ENSRNOG00000043866	AY172581.24		yes|up	1
ENSRNOG00000004810	Plcb1	phospholipase C beta 1 [Source:RGD Symbol;Acc:3344]	yes|up	1
ENSRNOG00000015994	Cd3d	CD3d molecule [Source:RGD Symbol;Acc:2304]	yes|down	1
ENSRNOG00000013220	Arhgap45	Rho GTPase activating protein 45 [Source:RGD Symbol;Acc:1308662]	yes|down	1
ENSRNOG00000001091	Hip1r	huntingtin interacting protein 1 related [Source:RGD Symbol;Acc:621615]	yes|down	1
ENSRNOG00000014503	Celf4	CUGBP, Elav-like family member 4 [Source:RGD Symbol;Acc:1307630]	yes|up	1
ENSRNOG00000014508	Mgll	monoglyceride lipase [Source:RGD Symbol;Acc:71039]	yes|up	1
ENSRNOG00000047414	AABR07058479.1		yes|down	1
ENSRNOG00000053179	LOC691277	similar to Robo-1 [Source:RGD Symbol;Acc:1586234]	yes|up	1
ENSRNOG00000004786	Cyp4f1	cytochrome P450, family 4, subfamily f, polypeptide 1 [Source:RGD Symbol;Acc:70926]	yes|up	1
ENSRNOG00000014641	Rpl3l	ribosomal protein L3-like [Source:RGD Symbol;Acc:1306315]	yes|down	1
ENSRNOG00000050657	Crlf3	cytokine receptor-like factor 3 [Source:MGI Symbol;Acc:MGI:1860086]	yes|down	1
ENSRNOG00000009339	Cenpe	centromere protein E [Source:RGD Symbol;Acc:1307115]	yes|down	1
ENSRNOG00000006946	Arhgap9	Rho GTPase activating protein 9 [Source:RGD Symbol;Acc:1305342]	yes|down	1
ENSRNOG00000005711	Ptprd	protein tyrosine phosphatase, receptor type, D [Source:RGD Symbol;Acc:1561090]	yes|up	1
ENSRNOG00000009334	Knstrn	kinetochore-localized astrin/SPAG5 binding protein [Source:RGD Symbol;Acc:1303240]	yes|down	1
ENSRNOG00000005365	Kcnip1	potassium voltage-gated channel interacting protein 1 [Source:RGD Symbol;Acc:70886]	yes|up	1
ENSRNOG00000050658	Tacr2	tachykinin receptor 2 [Source:RGD Symbol;Acc:3812]	yes|up	1
ENSRNOG00000051780	RF00561	predicted gene, 22382 [Source:MGI Symbol;Acc:MGI:5452159]	yes|up	1
ENSRNOG00000010658	LOC103691744	cystathionine gamma-lyase [Source:RGD Symbol;Acc:9153842]	yes|up	1
ENSRNOG00000009705	Lck	LCK proto-oncogene, Src family tyrosine kinase [Source:RGD Symbol;Acc:2994]	yes|down	1
ENSRNOG00000010128	Slc27a2	solute carrier family 27 member 2 [Source:RGD Symbol;Acc:71103]	yes|up	1
ENSRNOG00000004146	Coro7	coronin 7 [Source:RGD Symbol;Acc:621591]	yes|down	1
ENSRNOG00000004828	Acvr1c	activin A receptor type 1C [Source:RGD Symbol;Acc:621789]	yes|up	1
ENSRNOG00000000836	Ltb	lymphotoxin beta [Source:RGD Symbol;Acc:1303162]	yes|down	1
ENSRNOG00000043203	Krt75	keratin 75 [Source:RGD Symbol;Acc:1359576]	yes|down	1
ENSRNOG00000050090	Slc6a17	solute carrier family 6 member 17 [Source:RGD Symbol;Acc:1587185]	yes|up	1
ENSRNOG00000010121	Lef1	lymphoid enhancer binding factor 1 [Source:RGD Symbol;Acc:620241]	yes|down	1
ENSRNOG00000061862	Zbtb10	zinc finger and BTB domain containing 10 [Source:RGD Symbol;Acc:708377]	yes|up	1
ENSRNOG00000005390	Nup210	nucleoporin 210 [Source:RGD Symbol;Acc:69339]	yes|down	1
ENSRNOG00000016863	Pnma8b	PNMA family member 8B [Source:RGD Symbol;Acc:1560435]	yes|up	1
ENSRNOG00000029830	Adm2	adrenomedullin 2 [Source:RGD Symbol;Acc:1302971]	yes|down	1
ENSRNOG00000038598	AABR07032503.1		yes|down	1
ENSRNOG00000050819	Birc5	baculoviral IAP repeat-containing 5 [Source:RGD Symbol;Acc:70499]	yes|down	1
ENSRNOG00000015668	Ccl19	C-C motif chemokine ligand 19 [Source:RGD Symbol;Acc:1310336]	yes|down	1
ENSRNOG00000018874	Phf19	PHD finger protein 19 [Source:RGD Symbol;Acc:1310390]	yes|down	1
ENSRNOG00000028523	Tctn1	tectonic family member 1 [Source:RGD Symbol;Acc:1566266]	yes|down	1
ENSRNOG00000017395	Duox2	dual oxidase 2 [Source:RGD Symbol;Acc:628761]	yes|down	1
ENSRNOG00000017444	Nrsn1	neurensin 1 [Source:RGD Symbol;Acc:1307833]	yes|up	1
ENSRNOG00000009022	Rtkn	rhotekin [Source:RGD Symbol;Acc:727874]	yes|up	1
ENSRNOG00000015520	Ticrr	TOPBP1-interacting checkpoint and replication regulator [Source:RGD Symbol;Acc:1308541]	yes|down	1
ENSRNOG00000005568	AABR07064804.1		yes|up	1
ENSRNOG00000055156	LOC103694380	tumor necrosis factor-like [Source:RGD Symbol;Acc:9404643]	yes|down	1
ENSRNOG00000004560	Cacna1b	calcium voltage-gated channel subunit alpha1 B [Source:RGD Symbol;Acc:628852]	yes|up	1
ENSRNOG00000015529	Cdca3	cell division cycle associated 3 [Source:RGD Symbol;Acc:1359093]	yes|down	1
ENSRNOG00000010721	Dlgap5	DLG associated protein 5 [Source:RGD Symbol;Acc:1311247]	yes|down	1
ENSRNOG00000004441	Fcmr	Fc fragment of IgM receptor [Source:RGD Symbol;Acc:1359282]	yes|down	1
ENSRNOG00000010886	Nfe2l3	nuclear factor, erythroid 2-like 3 [Source:RGD Symbol;Acc:1307730]	yes|up	1
ENSRNOG00000032247	Bank1	B-cell scaffold protein with ankyrin repeats 1 [Source:RGD Symbol;Acc:1564639]	yes|down	1
ENSRNOG00000032246	Acsm3	acyl-CoA synthetase medium-chain family member 3 [Source:RGD Symbol;Acc:62086]	yes|down	1
ENSRNOG00000020652	Tgfb1	transforming growth factor, beta 1 [Source:RGD Symbol;Acc:69051]	yes|down	1
ENSRNOG00000055936	Trnp1	TMF1-regulated nuclear protein 1 [Source:RGD Symbol;Acc:1582917]	yes|up	1
ENSRNOG00000002946	Socs3	suppressor of cytokine signaling 3 [Source:RGD Symbol;Acc:621087]	yes|down	1
ENSRNOG00000027466	Cd27	CD27 molecule [Source:RGD Symbol;Acc:1560499]	yes|down	1
ENSRNOG00000037757	Calhm6	calcium homeostasis modulator family member 6 [Source:RGD Symbol;Acc:1304835]	yes|down	1
ENSRNOG00000031189	Ido1	indoleamine 2,3-dioxygenase 1 [Source:RGD Symbol;Acc:619989]	yes|down	1
ENSRNOG00000004966	Slc38a11	solute carrier family 38, member 11 [Source:RGD Symbol;Acc:1306005]	yes|up	1
ENSRNOG00000017428	Map1b	microtubule-associated protein 1B [Source:RGD Symbol;Acc:3043]	yes|up	1
ENSRNOG00000029903	Spock3	SPARC/osteonectin, cwcv and kazal like domains proteoglycan 3 [Source:RGD Symbol;Acc:1305672]	yes|up	1
ENSRNOG00000058539	Ccnb1	cyclin B1 [Source:RGD Symbol;Acc:2291]	yes|down	1
ENSRNOG00000017427	LOC100909840	profilin-2-like [Source:RGD Symbol;Acc:6501768]	yes|up	1
ENSRNOG00000011332	Clspn	claspin [Source:RGD Symbol;Acc:1309083]	yes|down	1
ENSRNOG00000011334	Tmem63c	transmembrane protein 63c [Source:RGD Symbol;Acc:1310207]	yes|up	1
ENSRNOG00000028844	Slc9a5	solute carrier family 9 member A5 [Source:RGD Symbol;Acc:620473]	yes|down	1
ENSRNOG00000004968	Ncapg2	non-SMC condensin II complex, subunit G2 [Source:RGD Symbol;Acc:1308406]	yes|down	1
ENSRNOG00000047817	Enox1	ecto-NOX disulfide-thiol exchanger 1 [Source:RGD Symbol;Acc:1306118]	yes|up	1
ENSRNOG00000059720	Syp	synaptophysin [Source:RGD Symbol;Acc:3802]	yes|up	1
ENSRNOG00000023227	AABR07052585.2		yes|down	1
ENSRNOG00000042220	Vsx1	visual system homeobox 1 [Source:RGD Symbol;Acc:1305667]	yes|down	1
ENSRNOG00000005404	Rasgrp1	RAS guanyl releasing protein 1 [Source:RGD Symbol;Acc:3539]	yes|down	1
ENSRNOG00000011680	Il16	interleukin 16 [Source:RGD Symbol;Acc:1583872]	yes|down	1
ENSRNOG00000010833	Mthfd2	methylenetetrahydrofolate dehydrogenase (NADP+ dependent) 2, methenyltetrahydrofolate cyclohydrolase [Source:RGD Symbol;Acc:1311313]	yes|down	1
ENSRNOG00000010834	Mpped1	metallophosphoesterase domain containing 1 [Source:RGD Symbol;Acc:1308244]	yes|down	1
ENSRNOG00000003831	Tdp1	tyrosyl-DNA phosphodiesterase 1 [Source:RGD Symbol;Acc:1309618]	yes|down	1
ENSRNOG00000010421	Wdr91	WD repeat domain 91 [Source:RGD Symbol;Acc:1306697]	yes|down	1
ENSRNOG00000060863	AABR07017145.1		yes|up	1
ENSRNOG00000018382	Inpp4b	inositol polyphosphate-4-phosphatase type II B [Source:RGD Symbol;Acc:620470]	yes|down	1
ENSRNOG00000011296	Cenpn	centromere protein N [Source:RGD Symbol;Acc:1310953]	yes|down	1
ENSRNOG00000018782	Gmnn	geminin, DNA replication inhibitor [Source:RGD Symbol;Acc:1308137]	yes|down	1
ENSRNOG00000002831	Wfikkn2	WAP, follistatin/kazal, immunoglobulin, kunitz and netrin domain containing 2 [Source:RGD Symbol;Acc:1305361]	yes|up	1
ENSRNOG00000019159	Jakmip2	janus kinase and microtubule interacting protein 2 [Source:RGD Symbol;Acc:1559742]	yes|up	1
ENSRNOG00000048321	Tnfsf8	TNF superfamily member 8 [Source:RGD Symbol;Acc:1590403]	yes|down	1
ENSRNOG00000016640	Dner	delta/notch-like EGF repeat containing [Source:RGD Symbol;Acc:1359385]	yes|up	1
ENSRNOG00000011250	Inmt	indolethylamine N-methyltransferase [Source:RGD Symbol;Acc:1597087]	yes|up	1
ENSRNOG00000023410	Apol9a	apolipoprotein L 9a [Source:RGD Symbol;Acc:1562332]	yes|up	1
ENSRNOG00000023828	LOC680875	similar to dystonin isoform 1 [Source:RGD Symbol;Acc:1587008]	yes|up	1
ENSRNOG00000037509	Chek2	checkpoint kinase 2 [Source:RGD Symbol;Acc:621543]	yes|down	1
ENSRNOG00000055382	Hcn1	hyperpolarization-activated cyclic nucleotide-gated potassium channel 1 [Source:RGD Symbol;Acc:620688]	yes|up	1
ENSRNOG00000018378	Cacnb2	calcium voltage-gated channel auxiliary subunit beta 2 [Source:RGD Symbol;Acc:67385]	yes|up	1
ENSRNOG00000048402	Igh-6	immunoglobulin heavy chain 6 [Source:RGD Symbol;Acc:1359202]	yes|down	1
ENSRNOG00000023312	Lonrf2	LON peptidase N-terminal domain and ring finger 2 [Source:RGD Symbol;Acc:1562137]	yes|up	1
ENSRNOG00000014107	Omg	oligodendrocyte-myelin glycoprotein [Source:RGD Symbol;Acc:1359125]	yes|up	1
ENSRNOG00000031824	Slc44a2	solute carrier family 44 member 2 [Source:RGD Symbol;Acc:1309680]	yes|down	1
ENSRNOG00000004048	Lrrk2	leucine-rich repeat kinase 2 [Source:RGD Symbol;Acc:1561168]	yes|down	1
ENSRNOG00000036829	Nckap1l	NCK associated protein 1 like [Source:RGD Symbol;Acc:1312032]	yes|down	1
ENSRNOG00000005854	Angpt1	angiopoietin 1 [Source:RGD Symbol;Acc:628896]	yes|up	1
ENSRNOG00000052549	Chga	chromogranin A [Source:RGD Symbol;Acc:2338]	yes|up	1
ENSRNOG00000000277	Tet1	tet methylcytosine dioxygenase 1 [Source:RGD Symbol;Acc:1310993]	yes|up	1
ENSRNOG00000011748	S100a5	S100 calcium binding protein A5 [Source:RGD Symbol;Acc:1308996]	yes|down	1
ENSRNOG00000032508	Acot5	acyl-CoA thioesterase 5 [Source:RGD Symbol;Acc:1565917]	yes|up	1
ENSRNOG00000000572	Chst3	carbohydrate sulfotransferase 3 [Source:RGD Symbol;Acc:620355]	yes|down	1
ENSRNOG00000037476	Galnt9	polypeptide N-acetylgalactosaminyltransferase 9 [Source:RGD Symbol;Acc:1311523]	yes|up	1
ENSRNOG00000056184	Lrp2	LDL receptor related protein 2 [Source:RGD Symbol;Acc:68407]	yes|down	1
ENSRNOG00000018122	Tspan17	tetraspanin 17 [Source:RGD Symbol;Acc:1311167]	yes|up	1
ENSRNOG00000061160	Htra4	HtrA serine peptidase 4 [Source:RGD Symbol;Acc:1306242]	yes|down	1
ENSRNOG00000048660	Haspin	histone H3 associated protein kinase [Source:RGD Symbol;Acc:1596276]	yes|down	1
ENSRNOG00000008463	Rundc3b	RUN domain containing 3B [Source:RGD Symbol;Acc:1587590]	yes|up	1
ENSRNOG00000019704	Resp18	regulated endocrine-specific protein 18 [Source:RGD Symbol;Acc:3555]	yes|up	1
ENSRNOG00000018797	Myrip	myosin VIIA and Rab interacting protein [Source:RGD Symbol;Acc:727731]	yes|up	1
ENSRNOG00000012017	Otulin	OTU deubiquitinase with linear linkage specificity [Source:RGD Symbol;Acc:2324500]	yes|down	1
ENSRNOG00000014215	Klf9	Kruppel-like factor 9 [Source:RGD Symbol;Acc:70934]	yes|up	1
ENSRNOG00000023005	LOC681325	hypothetical protein LOC681325 [Source:RGD Symbol;Acc:1596765]	yes|down	1
ENSRNOG00000032350	Kcnip4	potassium voltage-gated channel interacting protein 4 [Source:RGD Symbol;Acc:708539]	yes|up	1
ENSRNOG00000008841	Orc1	origin recognition complex, subunit 1 [Source:RGD Symbol;Acc:631435]	yes|down	1
ENSRNOG00000008416	Gimap5	GTPase, IMAP family member 5 [Source:RGD Symbol;Acc:628871]	yes|down	1
ENSRNOG00000014350	Ccn1	cellular communication network factor 1 [Source:RGD Symbol;Acc:620763]	yes|up	1
ENSRNOG00000008146	Tox2	TOX high mobility group box family member 2 [Source:RGD Symbol;Acc:735184]	yes|down	1
ENSRNOG00000010906	Ccl5	C-C motif chemokine ligand 5 [Source:RGD Symbol;Acc:69069]	yes|up	1
ENSRNOG00000000373	AABR07044900.1		yes|up	1
ENSRNOG00000011863	Gins3	GINS complex subunit 3 [Source:RGD Symbol;Acc:1308153]	yes|down	1
ENSRNOG00000054129	Ctla4	cytotoxic T-lymphocyte-associated protein 4 [Source:RGD Symbol;Acc:61975]	yes|down	1
ENSRNOG00000000855	Lst1	leukocyte specific transcript 1 [Source:RGD Symbol;Acc:620077]	yes|down	1
ENSRNOG00000019838	Gmfg	glia maturation factor, gamma [Source:RGD Symbol;Acc:620506]	yes|down	1
ENSRNOG00000046785	Col23a1	collagen type XXIII alpha 1 chain [Source:RGD Symbol;Acc:727898]	yes|up	1
ENSRNOG00000016460	Clu	clusterin [Source:RGD Symbol;Acc:3907]	yes|down	1
ENSRNOG00000007545	Angptl4	angiopoietin-like 4 [Source:RGD Symbol;Acc:735058]	yes|down	1
ENSRNOG00000012160	Syk	spleen associated tyrosine kinase [Source:RGD Symbol;Acc:3796]	yes|down	1
ENSRNOG00000007090	Cacna1c	calcium voltage-gated channel subunit alpha1 C [Source:RGD Symbol;Acc:2245]	yes|up	1
ENSRNOG00000014343	Anln	anillin, actin binding protein [Source:RGD Symbol;Acc:1561367]	yes|down	1
ENSRNOG00000007664	Tnfrsf13c	TNF receptor superfamily member 13C [Source:RGD Symbol;Acc:1560810]	yes|down	1
ENSRNOG00000019206	Nupr1	nuclear protein 1, transcriptional regulator [Source:RGD Symbol;Acc:69363]	yes|up	1
ENSRNOG00000008365	Hoxb2	homeobox B2 [Source:RGD Symbol;Acc:2319509]	yes|up	1
ENSRNOG00000008209	St3gal1	ST3 beta-galactoside alpha-2,3-sialyltransferase 1 [Source:RGD Symbol;Acc:1309373]	yes|up	1
ENSRNOG00000008369	Gimap4	GTPase, IMAP family member 4 [Source:RGD Symbol;Acc:628765]	yes|down	1
ENSRNOG00000022971	AC115666.1	zinc finger protein 454 [Source:NCBI gene;Acc:102555919]	yes|up	1
ENSRNOG00000039859	Dnmt1	DNA methyltransferase 1 [Source:RGD Symbol;Acc:620979]	yes|down	1
ENSRNOG00000028335	Fat4	FAT atypical cadherin 4 [Source:RGD Symbol;Acc:1564291]	yes|up	1
ENSRNOG00000019843	St3gal3	ST3 beta-galactoside alpha-2,3-sialyltransferase 3 [Source:RGD Symbol;Acc:68414]	yes|up	1
ENSRNOG00000004487	Nek2	NIMA-related kinase 2 [Source:RGD Symbol;Acc:619792]	yes|down	1
ENSRNOG00000015275	Ska1	spindle and kinetochore associated complex subunit 1 [Source:RGD Symbol;Acc:1310784]	yes|down	1
ENSRNOG00000022373	Dennd4b	DENN domain containing 4B [Source:RGD Symbol;Acc:1560320]	yes|down	1
ENSRNOG00000000386	Pbld1	phenazine biosynthesis-like protein domain containing 1 [Source:RGD Symbol;Acc:621263]	yes|up	1
ENSRNOG00000007069	Adhfe1	alcohol dehydrogenase, iron containing, 1 [Source:RGD Symbol;Acc:1308863]	yes|up	1
ENSRNOG00000025551	Rgs22	regulator of G-protein signaling 22 [Source:RGD Symbol;Acc:1565493]	yes|up	1
ENSRNOG00000021814	Tnfrsf25	TNF receptor superfamily member 25 [Source:RGD Symbol;Acc:1598206]	yes|down	1
ENSRNOG00000047046	Plin4	perilipin 4 [Source:RGD Symbol;Acc:1590867]	yes|up	1
ENSRNOG00000015072	Ptgr1	prostaglandin reductase 1 [Source:RGD Symbol;Acc:621195]	yes|up	1
ENSRNOG00000029087	Nap1l3	nucleosome assembly protein 1-like 3 [Source:RGD Symbol;Acc:620990]	yes|up	1
ENSRNOG00000003657	Pkmyt1	protein kinase, membrane associated tyrosine/threonine 1 [Source:RGD Symbol;Acc:1305434]	yes|down	1
ENSRNOG00000003650	Nt5c	5', 3'-nucleotidase, cytosolic [Source:RGD Symbol;Acc:2321875]	yes|down	1
ENSRNOG00000046309	LOC102553138	ovarian cancer G-protein coupled receptor 1-like [Source:RGD Symbol;Acc:7533718]	yes|down	1
ENSRNOG00000016210	Micalcl	MICAL C-terminal like [Source:RGD Symbol;Acc:735042]	yes|up	1
ENSRNOG00000011921	Dusp4	dual specificity phosphatase 4 [Source:RGD Symbol;Acc:620625]	yes|down	1
ENSRNOG00000036826	Glycam1	glycosylation dependent cell adhesion molecule 1 [Source:RGD Symbol;Acc:2712]	yes|down	1
ENSRNOG00000029862	Spc24	SPC24, NDC80 kinetochore complex component [Source:RGD Symbol;Acc:1307631]	yes|down	1
ENSRNOG00000007243	Havcr1	hepatitis A virus cellular receptor 1 [Source:RGD Symbol;Acc:708425]	yes|down	1
ENSRNOG00000022298	Cxcl11	C-X-C motif chemokine ligand 11 [Source:RGD Symbol;Acc:727827]	yes|up	1
ENSRNOG00000021256	Adra1d	adrenoceptor alpha 1D [Source:RGD Symbol;Acc:62064]	yes|up	1
ENSRNOG00000036828	Pde1b	phosphodiesterase 1B [Source:RGD Symbol;Acc:3278]	yes|up	1
ENSRNOG00000008966	Slco5a1	solute carrier organic anion transporter family, member 5A1 [Source:RGD Symbol;Acc:1307132]	yes|down	1
ENSRNOG00000011421	Smap2	small ArfGAP2 [Source:RGD Symbol;Acc:1308418]	yes|down	1
ENSRNOG00000060011	LOC103694871	pre-B lymphocyte protein 3-like [Source:RGD Symbol;Acc:9477019]	yes|down	1
ENSRNOG00000008513	LOC103690019	protein DBF4 homolog A-like [Source:RGD Symbol;Acc:9449239]	yes|down	1
ENSRNOG00000007894	Mpdz	multiple PDZ domain crumbs cell polarity complex component [Source:RGD Symbol;Acc:3105]	yes|up	1
ENSRNOG00000013605	AC120568.1		yes|up	1
ENSRNOG00000012344	Slc7a9	solute carrier family 7 member 9 [Source:RGD Symbol;Acc:619905]	yes|down	1
ENSRNOG00000008846	Plag1	PLAG1 zinc finger [Source:RGD Symbol;Acc:1305286]	yes|up	1
ENSRNOG00000013167	Hmgb2	high mobility group box 2 [Source:RGD Symbol;Acc:69291]	yes|down	1
ENSRNOG00000008849	Guca2a	guanylate cyclase activator 2A [Source:RGD Symbol;Acc:2766]	yes|up	1
ENSRNOG00000007483	Ccnf	cyclin F [Source:RGD Symbol;Acc:67401]	yes|down	1
ENSRNOG00000006235	Nell2	neural EGFL like 2 [Source:RGD Symbol;Acc:620999]	yes|up	1
ENSRNOG00000013162	Zcchc12	zinc finger CCHC-type containing 12 [Source:RGD Symbol;Acc:1359439]	yes|up	1
ENSRNOG00000006236	Dsn1	DSN1 homolog, MIS12 kinetochore complex component [Source:RGD Symbol;Acc:1565179]	yes|down	1
ENSRNOG00000006305	Slc38a2	solute carrier family 38, member 2 [Source:RGD Symbol;Acc:69420]	yes|up	1
ENSRNOG00000015003	Pex11a	peroxisomal biogenesis factor 11 alpha [Source:RGD Symbol;Acc:619842]	yes|up	1
ENSRNOG00000000459	Psmb9	proteasome subunit beta 9 [Source:RGD Symbol;Acc:3427]	yes|down	1
ENSRNOG00000000596	Fyn	FYN proto-oncogene, Src family tyrosine kinase [Source:RGD Symbol;Acc:2641]	yes|down	1
ENSRNOG00000008560	AABR07049790.1	coiled-coil domain containing 30 [Source:NCBI gene;Acc:362580]	yes|up	1
ENSRNOG00000001908	Klhl6	kelch-like family member 6 [Source:RGD Symbol;Acc:1307521]	yes|down	1
ENSRNOG00000016136	Pdcd1lg2	programmed cell death 1 ligand 2 [Source:RGD Symbol;Acc:1306403]	yes|down	1
ENSRNOG00000000456	Psmb8	proteasome subunit beta 8 [Source:RGD Symbol;Acc:3426]	yes|down	1
ENSRNOG00000000454	RT1-DOb	RT1 class II, locus DOb [Source:RGD Symbol;Acc:1595814]	yes|down	1
ENSRNOG00000000699	Selplg	selectin P ligand [Source:RGD Symbol;Acc:1307971]	yes|down	1
ENSRNOG00000043416	Bcl3	BCL3, transcription coactivator [Source:RGD Symbol;Acc:1589465]	yes|down	1
ENSRNOG00000043414	Fcrl5	Fc receptor-like 5 [Source:RGD Symbol;Acc:1589379]	yes|down	1
ENSRNOG00000026919	RGD1565367	similar to Solute carrier family 23, member 2 (Sodium-dependent vitamin C transporter 2) [Source:RGD Symbol;Acc:1565367]	yes|down	1
ENSRNOG00000002792	Cxcl2	C-X-C motif chemokine ligand 2 [Source:RGD Symbol;Acc:70069]	yes|down	1
ENSRNOG00000000693	Svop	SV2 related protein [Source:RGD Symbol;Acc:620277]	yes|up	1
ENSRNOG00000016189	Frmd5	FERM domain containing 5 [Source:RGD Symbol;Acc:1561554]	yes|up	1
ENSRNOG00000000451	RT1-Ba	RT1 class II, locus Ba [Source:RGD Symbol;Acc:1595867]	yes|down	1
ENSRNOG00000007437	Irf5	interferon regulatory factor 5 [Source:RGD Symbol;Acc:1310447]	yes|down	1
ENSRNOG00000006280	Pcsk9	proprotein convertase subtilisin/kexin type 9 [Source:RGD Symbol;Acc:728909]	yes|down	1
ENSRNOG00000020699	Cd37	CD37 molecule [Source:RGD Symbol;Acc:62035]	yes|down	1
ENSRNOG00000025745	Gpr17	G protein-coupled receptor 17 [Source:RGD Symbol;Acc:1589785]	yes|up	1
ENSRNOG00000024693	Zfp831	zinc finger protein 831 [Source:RGD Symbol;Acc:1565819]	yes|down	1
ENSRNOG00000034190	Ighm	immunoglobulin heavy constant mu [Source:MGI Symbol;Acc:MGI:96448]	yes|down	1
ENSRNOG00000012580	Ccdc141	coiled-coil domain containing 141 [Source:RGD Symbol;Acc:1593250]	yes|up	1
ENSRNOG00000007439	Unc13d	unc-13 homolog D [Source:RGD Symbol;Acc:628593]	yes|down	1
ENSRNOG00000008837	Ass1	argininosuccinate synthase 1 [Source:RGD Symbol;Acc:2163]	yes|up	1
ENSRNOG00000056783	Cd69	Cd69 molecule [Source:RGD Symbol;Acc:61318]	yes|down	1
ENSRNOG00000029776	AABR07065823.1		yes|down	1
ENSRNOG00000020872	Cd5	Cd5 molecule [Source:RGD Symbol;Acc:2309]	yes|down	1
ENSRNOG00000001653	St3gal6	ST3 beta-galactoside alpha-2,3-sialyltransferase 6 [Source:RGD Symbol;Acc:1303279]	yes|down	1
ENSRNOG00000013938	Tshz3	teashirt zinc finger homeobox 3 [Source:RGD Symbol;Acc:1306322]	yes|up	1
ENSRNOG00000020138	Slc4a3	solute carrier family 4 member 3 [Source:RGD Symbol;Acc:3712]	yes|up	1
ENSRNOG00000016069	Cd3e	CD3e molecule [Source:RGD Symbol;Acc:1309222]	yes|down	1
ENSRNOG00000021087	Lgi4	leucine-rich repeat LGI family, member 4 [Source:RGD Symbol;Acc:735035]	yes|up	1
ENSRNOG00000001628	Pcp4	Purkinje cell protein 4 [Source:RGD Symbol;Acc:3271]	yes|up	1
ENSRNOG00000003134	Slc4a4	solute carrier family 4 member 4 [Source:RGD Symbol;Acc:68936]	yes|up	1
ENSRNOG00000003136	Fcrla	Fc receptor-like A [Source:RGD Symbol;Acc:1306176]	yes|down	1
ENSRNOG00000013598	Melk	maternal embryonic leucine zipper kinase [Source:RGD Symbol;Acc:1308974]	yes|down	1
ENSRNOG00000029342	Scn7a	sodium voltage-gated channel alpha subunit 7 [Source:RGD Symbol;Acc:61922]	yes|up	1
ENSRNOG00000011992	Slc18a1	solute carrier family 18 member A1 [Source:RGD Symbol;Acc:3693]	yes|up	1
ENSRNOG00000026821	Arhgap42	Rho GTPase activating protein 42 [Source:RGD Symbol;Acc:1564081]	yes|up	1
ENSRNOG00000017108	Syngr1	synaptogyrin 1 [Source:RGD Symbol;Acc:3801]	yes|up	1
ENSRNOG00000007805	Mybl2	MYB proto-oncogene like 2 [Source:RGD Symbol;Acc:1308474]	yes|down	1
ENSRNOG00000022999	Ppp2r3a	protein phosphatase 2, regulatory subunit B'', alpha [Source:RGD Symbol;Acc:1306958]	yes|up	1
ENSRNOG00000032970	Gpr174	G protein-coupled receptor 174 [Source:RGD Symbol;Acc:1564689]	yes|down	1
ENSRNOG00000014427	Chrnb4	cholinergic receptor nicotinic beta 4 subunit [Source:RGD Symbol;Acc:2351]	yes|up	1
ENSRNOG00000021100	Tnfaip8l2	TNF alpha induced protein 8 like 2 [Source:RGD Symbol;Acc:1310519]	yes|down	1
ENSRNOG00000021103	Nrxn2	neurexin 2 [Source:RGD Symbol;Acc:620211]	yes|up	1
ENSRNOG00000018808	Vip	vasoactive intestinal peptide [Source:RGD Symbol;Acc:621647]	yes|up	1
ENSRNOG00000020689	Cpeb3	cytoplasmic polyadenylation element binding protein 3 [Source:RGD Symbol;Acc:1564670]	yes|up	1
ENSRNOG00000020726	Sipa1	signal-induced proliferation-associated 1 [Source:RGD Symbol;Acc:1303184]	yes|down	1
ENSRNOG00000030771	Dgkb	diacylglycerol kinase, beta [Source:RGD Symbol;Acc:2488]	yes|up	1
ENSRNOG00000050974	AABR07030773.1		yes|up	1
ENSRNOG00000057060	LOC108348049	protocadherin Fat 4-like [Source:RGD Symbol;Acc:11459080]	yes|up	1
ENSRNOG00000020687	Dpf1	double PHD fingers 1 [Source:RGD Symbol;Acc:61868]	yes|up	1
ENSRNOG00000036960	Abcc9	ATP binding cassette subfamily C member 9 [Source:RGD Symbol;Acc:3787]	yes|up	1
ENSRNOG00000042140	Eomes	eomesodermin [Source:NCBI gene;Acc:316052]	yes|down	1
ENSRNOG00000053062	AABR07043625.1		yes|up	1
ENSRNOG00000003224	Nudt16l1	nudix hydrolase 16 like 1 [Source:RGD Symbol;Acc:1561451]	yes|down	1
ENSRNOG00000003348	Rasd1	ras related dexamethasone induced 1 [Source:RGD Symbol;Acc:619727]	yes|up	1
ENSRNOG00000001492	Slc8a2	solute carrier family 8 member A2 [Source:RGD Symbol;Acc:620194]	yes|up	1
ENSRNOG00000002217	LOC100910270	uncharacterized LOC100910270 [Source:RGD Symbol;Acc:6499131]	yes|down	1
ENSRNOG00000002215	Mylk	myosin light chain kinase [Source:RGD Symbol;Acc:1310915]	yes|up	1
ENSRNOG00000012512	Nexn	nexilin (F actin binding protein) [Source:RGD Symbol;Acc:708354]	yes|up	1
ENSRNOG00000024190	Rasef	RAS and EF hand domain containing [Source:RGD Symbol;Acc:1306418]	yes|up	1
ENSRNOG00000002218	Stbd1	starch binding domain 1 [Source:RGD Symbol;Acc:1311800]	yes|up	1
ENSRNOG00000005159	Fam135b	family with sequence similarity 135, member B [Source:RGD Symbol;Acc:1308133]	yes|up	1
ENSRNOG00000001470	Limk1	LIM domain kinase 1 [Source:RGD Symbol;Acc:62055]	yes|down	1
ENSRNOG00000001578	Hoxd4	homeo box D4 [Source:RGD Symbol;Acc:1309690]	yes|up	1
ENSRNOG00000027480	Tmem116	transmembrane protein 116 [Source:RGD Symbol;Acc:1596066]	yes|up	1
ENSRNOG00000053204	AABR07017872.1		yes|down	1
ENSRNOG00000005154	Alkal2	ALK and LTK ligand 2 [Source:RGD Symbol;Acc:1587117]	yes|up	1
ENSRNOG00000053200	AABR07068161.1	dedicator of cytokinesis 10 [Source:NCBI gene;Acc:301556]	yes|down	1
ENSRNOG00000001270	Hvcn1	hydrogen voltage-gated channel 1 [Source:RGD Symbol;Acc:1310788]	yes|down	1
ENSRNOG00000057760	Stil	STIL, centriolar assembly protein [Source:RGD Symbol;Acc:1304972]	yes|down	1
ENSRNOG00000005874	Tle2	TLE family member 2, transcriptional corepressor [Source:RGD Symbol;Acc:1306665]	yes|up	1
ENSRNOG00000020908	LOC303566	E2F1-inducible gene [Source:RGD Symbol;Acc:1305385]	yes|down	1
ENSRNOG00000004874	Flrt3	fibronectin leucine rich transmembrane protein 3 [Source:RGD Symbol;Acc:1566005]	yes|up	1
ENSRNOG00000005659	Aurkb	aurora kinase B [Source:RGD Symbol;Acc:621625]	yes|down	1
ENSRNOG00000005807	Ptpn7	protein tyrosine phosphatase, non-receptor type 7 [Source:RGD Symbol;Acc:708516]	yes|down	1
ENSRNOG00000013704	Cps1	carbamoyl-phosphate synthase 1 [Source:RGD Symbol;Acc:2395]	yes|up	1
ENSRNOG00000000871	Cd40lg	CD40 ligand [Source:RGD Symbol;Acc:708418]	yes|down	1
ENSRNOG00000007905	Itga7	integrin subunit alpha 7 [Source:RGD Symbol;Acc:71022]	yes|up	1
ENSRNOG00000009832	Slc39a14	solute carrier family 39 member 14 [Source:RGD Symbol;Acc:1307026]	yes|up	1
ENSRNOG00000030575	AABR07013111.1		yes|down	1
ENSRNOG00000057264	Tex49	testis expressed 49 [Source:RGD Symbol;Acc:1305928]	yes|up	1
ENSRNOG00000037960	Stum	stum, mechanosensory transduction mediator homolog [Source:RGD Symbol;Acc:1592263]	yes|up	1
ENSRNOG00000005809	Arhgdib	Rho GDP dissociation inhibitor beta [Source:RGD Symbol;Acc:1305383]	yes|down	1
ENSRNOG00000017188	Cyp27a1	cytochrome P450, family 27, subfamily a, polypeptide 1 [Source:RGD Symbol;Acc:727915]	yes|up	1
ENSRNOG00000030187	Mmp12	matrix metallopeptidase 12 [Source:RGD Symbol;Acc:620195]	yes|down	1
ENSRNOG00000001088	Rfc3	replication factor C subunit 3 [Source:RGD Symbol;Acc:1306832]	yes|down	1
ENSRNOG00000030180	Lrrc10b	leucine rich repeat containing 10B [Source:RGD Symbol;Acc:1564983]	yes|up	1
ENSRNOG00000010794	Dennd3	DENN domain containing 3 [Source:RGD Symbol;Acc:1311559]	yes|down	1
ENSRNOG00000005274	Vrk1	VRK serine/threonine kinase 1 [Source:RGD Symbol;Acc:1306069]	yes|down	1
ENSRNOG00000006932	AABR07029272.1		yes|down	1
ENSRNOG00000020465	Ripk3	receptor-interacting serine-threonine kinase 3 [Source:RGD Symbol;Acc:628899]	yes|down	1
ENSRNOG00000004772	Cytip	cytohesin 1 interacting protein [Source:RGD Symbol;Acc:1307990]	yes|down	1
ENSRNOG00000047890	Lrrc23	leucine rich repeat containing 23 [Source:RGD Symbol;Acc:1304779]	yes|down	1
ENSRNOG00000005376	Mad2l1	mitotic arrest deficient 2 like 1 [Source:RGD Symbol;Acc:1310889]	yes|down	1
ENSRNOG00000005278	Trhde	thyrotropin-releasing hormone degrading enzyme [Source:RGD Symbol;Acc:728895]	yes|up	1
ENSRNOG00000005370	S1pr4	sphingosine-1-phosphate receptor 4 [Source:RGD Symbol;Acc:1304801]	yes|down	1
ENSRNOG00000006120	Shh	sonic hedgehog signaling molecule [Source:RGD Symbol;Acc:3673]	yes|up	1
ENSRNOG00000002012	Donson	downstream neighbor of SON [Source:RGD Symbol;Acc:1306823]	yes|down	1
ENSRNOG00000010798	Blk	BLK proto-oncogene, Src family tyrosine kinase [Source:RGD Symbol;Acc:1308859]	yes|down	1
ENSRNOG00000004679	Fign	fidgetin, microtubule severing factor [Source:RGD Symbol;Acc:1308174]	yes|up	1
ENSRNOG00000004678	Itln1	intelectin 1 [Source:RGD Symbol;Acc:1561048]	yes|up	1
ENSRNOG00000039204	Pram1	PML-RARA regulated adaptor molecule 1 [Source:RGD Symbol;Acc:1564330]	yes|down	1
ENSRNOG00000017146	Nfatc1	nuclear factor of activated T-cells 1 [Source:RGD Symbol;Acc:2319357]	yes|down	1
ENSRNOG00000009785	Cdkn3	cyclin-dependent kinase inhibitor 3 [Source:RGD Symbol;Acc:1307781]	yes|down	1
ENSRNOG00000031058	Was	Wiskott-Aldrich syndrome [Source:RGD Symbol;Acc:1563567]	yes|down	1
ENSRNOG00000016999	Grp	gastrin releasing peptide [Source:RGD Symbol;Acc:621740]	yes|up	1
ENSRNOG00000016852	Apobec3	apolipoprotein B mRNA editing enzyme catalytic subunit 3 [Source:RGD Symbol;Acc:1307800]	yes|down	1
ENSRNOG00000016853	Dsg1	desmoglein 1 [Source:RGD Symbol;Acc:1309925]	yes|down	1
ENSRNOG00000058434	Cfap99	cilia and flagella associated protein 99 [Source:RGD Symbol;Acc:1564567]	yes|down	1
ENSRNOG00000015773	Il21r	interleukin 21 receptor [Source:RGD Symbol;Acc:1304950]	yes|down	1
ENSRNOG00000062220	Cenpp	centromere protein P [Source:RGD Symbol;Acc:1589530]	yes|down	1
ENSRNOG00000015674	Acap1	ArfGAP with coiled-coil, ankyrin repeat and PH domains 1 [Source:RGD Symbol;Acc:1305360]	yes|down	1
ENSRNOG00000017503	Ppargc1b	PPARG coactivator 1 beta [Source:RGD Symbol;Acc:727948]	yes|up	1
ENSRNOG00000016995	Zap70	zeta chain of T cell receptor associated protein kinase 70 [Source:RGD Symbol;Acc:3983]	yes|down	1
ENSRNOG00000020505	Map4k1	mitogen activated protein kinase kinase kinase kinase 1 [Source:RGD Symbol;Acc:1305463]	yes|down	1
ENSRNOG00000050034	LOC501297	hypothetical LOC501297 [Source:RGD Symbol;Acc:1589596]	yes|up	1
ENSRNOG00000055499	Grid1	glutamate ionotropic receptor delta type subunit 1 [Source:RGD Symbol;Acc:68366]	yes|up	1
ENSRNOG00000005575	Abi3	ABI family, member 3 [Source:RGD Symbol;Acc:1311794]	yes|down	1
ENSRNOG00000004444	Ikzf1	IKAROS family zinc finger 1 [Source:RGD Symbol;Acc:1562979]	yes|down	1
ENSRNOG00000018615	Cenph	centromere protein H [Source:RGD Symbol;Acc:1583506]	yes|down	1
ENSRNOG00000008759	Csf3r	colony stimulating factor 3 receptor [Source:RGD Symbol;Acc:1309114]	yes|down	1
ENSRNOG00000003480	Aim2	absent in melanoma 2 [Source:RGD Symbol;Acc:1307283]	yes|down	1
ENSRNOG00000049024	AABR07051611.1		yes|down	1
ENSRNOG00000049925	Cd79al	Cd79a molecule-like [Source:RGD Symbol;Acc:1598036]	yes|down	1
ENSRNOG00000037211	Kif14	kinesin family member 14 [Source:RGD Symbol;Acc:1310650]	yes|down	1
ENSRNOG00000028992	Acan	aggrecan [Source:RGD Symbol;Acc:68358]	yes|up	1
ENSRNOG00000059997	Brip1	BRCA1 interacting protein C-terminal helicase 1 [Source:RGD Symbol;Acc:1307659]	yes|down	1
ENSRNOG00000059519	Bbox1	gamma-butyrobetaine hydroxylase 1 [Source:RGD Symbol;Acc:619756]	yes|up	1
ENSRNOG00000029911	Cilp	cartilage intermediate layer protein [Source:RGD Symbol;Acc:1305124]	yes|down	1
ENSRNOG00000004994	Agr3	anterior gradient 3, protein disulphide isomerase family member [Source:RGD Symbol;Acc:1565406]	yes|up	1
ENSRNOG00000059326	Abca9	ATP binding cassette subfamily A member 9 [Source:RGD Symbol;Acc:1305931]	yes|up	1
ENSRNOG00000005776	Bcl11b	BCL11B, BAF complex component [Source:RGD Symbol;Acc:1311128]	yes|down	1
ENSRNOG00000004687	Thbd	thrombomodulin [Source:RGD Symbol;Acc:621299]	yes|up	1
ENSRNOG00000004682	Parpbp	PARP1 binding protein [Source:RGD Symbol;Acc:2314264]	yes|down	1
ENSRNOG00000016023	Kank1	KN motif and ankyrin repeat domains 1 [Source:RGD Symbol;Acc:1307714]	yes|up	1
ENSRNOG00000015718	RGD1307461	similar to RIKEN cDNA 6430571L13 gene; similar to g20 protein [Source:RGD Symbol;Acc:1307461]	yes|up	1
ENSRNOG00000003439	Il15	interleukin 15 [Source:RGD Symbol;Acc:2887]	yes|up	1
ENSRNOG00000018397	Dnph1	2'-deoxynucleoside 5'-phosphate N-hydrolase 1 [Source:RGD Symbol;Acc:620382]	yes|down	1
ENSRNOG00000043077	Zfpm1	zinc finger protein, multitype 1 [Source:RGD Symbol;Acc:1582810]	yes|down	1
ENSRNOG00000043176	AABR07059308.1		yes|down	1
ENSRNOG00000032426	Slc10a5	solute carrier family 10, member 5 [Source:RGD Symbol;Acc:1306036]	yes|up	1
ENSRNOG00000011452	Aldoc	aldolase, fructose-bisphosphate C [Source:RGD Symbol;Acc:2091]	yes|up	1
ENSRNOG00000009450	Hcn4	hyperpolarization activated cyclic nucleotide-gated potassium channel 4 [Source:RGD Symbol;Acc:71065]	yes|up	1
ENSRNOG00000045801	Abo2	histo-blood group ABO system transferase 2 [Source:RGD Symbol;Acc:1311152]	yes|up	1
ENSRNOG00000016670	AABR07028769.1		yes|down	1
ENSRNOG00000005985	Kcnma1	potassium calcium-activated channel subfamily M alpha 1 [Source:RGD Symbol;Acc:620715]	yes|up	1
ENSRNOG00000011211	Pex5l	peroxisomal biogenesis factor 5-like [Source:RGD Symbol;Acc:708407]	yes|up	1
ENSRNOG00000061695	Slc23a1	solute carrier family 23 member 1 [Source:RGD Symbol;Acc:619875]	yes|up	1
ENSRNOG00000057979	AABR07011700.1		yes|up	1
ENSRNOG00000017645	Mylpf	myosin light chain, phosphorylatable, fast skeletal muscle [Source:RGD Symbol;Acc:3141]	yes|down	1
ENSRNOG00000059660	AABR07065531.5		yes|up	1
ENSRNOG00000004192	Arhgap30	Rho GTPase activating protein 30 [Source:RGD Symbol;Acc:1561419]	yes|down	1
ENSRNOG00000018337	Caly	calcyon neuron-specific vesicular protein [Source:RGD Symbol;Acc:621719]	yes|up	1
ENSRNOG00000048411	Uhrf1	ubiquitin-like with PHD and ring finger domains 1 [Source:RGD Symbol;Acc:1595855]	yes|down	1
ENSRNOG00000018092	Cd83	CD83 molecule [Source:RGD Symbol;Acc:1309677]	yes|down	1
ENSRNOG00000061199	Tcfl5	transcription factor like 5 [Source:RGD Symbol;Acc:1305899]	yes|down	1
ENSRNOG00000004195	Dtl	denticleless E3 ubiquitin protein ligase homolog [Source:RGD Symbol;Acc:1310439]	yes|down	1
ENSRNOG00000014294	Ptpn6	protein tyrosine phosphatase, non-receptor type 6 [Source:RGD Symbol;Acc:620660]	yes|down	1
ENSRNOG00000054524	Tnip3	TNFAIP3 interacting protein 3 [Source:RGD Symbol;Acc:1588732]	yes|down	1
ENSRNOG00000005509	Pak7	p21 (RAC1) activated kinase 7 [Source:RGD Symbol;Acc:1312009]	yes|up	1
ENSRNOG00000011171	Rims3	regulating synaptic membrane exocytosis 3 [Source:RGD Symbol;Acc:628762]	yes|up	1
ENSRNOG00000032699	Ttyh1	tweety family member 1 [Source:RGD Symbol;Acc:1310103]	yes|up	1
ENSRNOG00000023881	Skap1	src kinase associated phosphoprotein 1 [Source:RGD Symbol;Acc:708436]	yes|down	1
ENSRNOG00000028238	Sh3bgr	SH3 domain binding glutamate-rich protein [Source:RGD Symbol;Acc:1563599]	yes|up	1
ENSRNOG00000033064	Edil3	EGF like repeats and discoidin domains 3 [Source:RGD Symbol;Acc:1588887]	yes|up	1
ENSRNOG00000018488	Cd40	CD40 molecule [Source:RGD Symbol;Acc:619830]	yes|down	1
ENSRNOG00000052880	Prph	peripherin [Source:RGD Symbol;Acc:3414]	yes|up	1
ENSRNOG00000052887	Dnajc6	DnaJ heat shock protein family (Hsp40) member C6 [Source:RGD Symbol;Acc:1309900]	yes|up	1
ENSRNOG00000016374	Fgfr2	fibroblast growth factor receptor 2 [Source:RGD Symbol;Acc:2611]	yes|up	1
ENSRNOG00000016377	Cep55	centrosomal protein 55 [Source:RGD Symbol;Acc:1305340]	yes|down	1
ENSRNOG00000011074	Calcb	calcitonin-related polypeptide, beta [Source:RGD Symbol;Acc:620997]	yes|up	1
ENSRNOG00000002693	Nme1	NME/NM23 nucleoside diphosphate kinase 1 [Source:RGD Symbol;Acc:70497]	yes|down	1
ENSRNOG00000043387	Cpe	carboxypeptidase E [Source:RGD Symbol;Acc:2394]	yes|up	1
ENSRNOG00000018644	Slc6a7	solute carrier family 6 member 7 [Source:RGD Symbol;Acc:620928]	yes|up	1
ENSRNOG00000047799	Gnb5	G protein subunit beta 5 [Source:RGD Symbol;Acc:620759]	yes|up	1
ENSRNOG00000026762	RT1-DOa	RT1 class II, locus DOa [Source:RGD Symbol;Acc:3477]	yes|down	1
ENSRNOG00000022044	Cabp4	calcium binding protein 4 [Source:RGD Symbol;Acc:1306083]	yes|down	1
ENSRNOG00000023068	Cd5l	Cd5 molecule-like [Source:RGD Symbol;Acc:1308526]	yes|down	1
ENSRNOG00000016174	Slc35b3	solute carrier family 35 member B3 [Source:RGD Symbol;Acc:1307183]	yes|up	1
ENSRNOG00000008091	Gins1	GINS complex subunit 1 [Source:RGD Symbol;Acc:1562246]	yes|down	1
ENSRNOG00000048706	Nox1	NADPH oxidase 1 [Source:RGD Symbol;Acc:620598]	yes|down	1
ENSRNOG00000019141	Ch25h	cholesterol 25-hydroxylase [Source:RGD Symbol;Acc:1310575]	yes|up	1
ENSRNOG00000061578	AABR07057333.1		yes|up	1
ENSRNOG00000014202	Snx20	sorting nexin 20 [Source:RGD Symbol;Acc:1307787]	yes|down	1
ENSRNOG00000008177	Pim2	Pim-2 proto-oncogene, serine/threonine kinase [Source:RGD Symbol;Acc:1560759]	yes|down	1
ENSRNOG00000034290	Ccl21	C-C motif chemokine ligand 21 [Source:RGD Symbol;Acc:1311996]	yes|down	1
ENSRNOG00000014205	Klf2	Kruppel-like factor 2 [Source:RGD Symbol;Acc:1359220]	yes|down	1
ENSRNOG00000006726	Zfp9	zinc finger protein 9 [Source:NCBI gene;Acc:100158232]	yes|up	1
ENSRNOG00000014361	Edn1	endothelin 1 [Source:RGD Symbol;Acc:2532]	yes|up	1
ENSRNOG00000012747	Spock1	sparc/osteonectin, cwcv and kazal like domains proteoglycan 1 [Source:RGD Symbol;Acc:1311496]	yes|up	1
ENSRNOG00000022099	Trim72	tripartite motif containing 72 [Source:RGD Symbol;Acc:1562778]	yes|down	1
ENSRNOG00000014366	Shc3	SHC adaptor protein 3 [Source:RGD Symbol;Acc:69348]	yes|up	1
ENSRNOG00000005367	Slc12a1	solute carrier family 12 member 1 [Source:RGD Symbol;Acc:3685]	yes|up	1
ENSRNOG00000007808	Nap1l5	nucleosome assembly protein 1-like 5 [Source:RGD Symbol;Acc:1584123]	yes|up	1
ENSRNOG00000015498	Il17rb	interleukin 17 receptor B [Source:RGD Symbol;Acc:1311392]	yes|up	1
ENSRNOG00000002548	Tnn	tenascin N [Source:RGD Symbol;Acc:1306002]	yes|down	1
ENSRNOG00000001427	Orai2	ORAI calcium release-activated calcium modulator 2 [Source:RGD Symbol;Acc:1310213]	yes|down	1
ENSRNOG00000022009	Mzb1	marginal zone B and B1 cell-specific protein [Source:RGD Symbol;Acc:1310251]	yes|down	1
ENSRNOG00000029131	AABR07024637.1		yes|down	1
ENSRNOG00000010610	Hpgd	15-hydroxyprostaglandin dehydrogenase [Source:RGD Symbol;Acc:620087]	yes|up	1
ENSRNOG00000003649	Qsox1	quiescin sulfhydryl oxidase 1 [Source:RGD Symbol;Acc:68957]	yes|up	1
ENSRNOG00000024825	Fam163a	family with sequence similarity 163, member A [Source:RGD Symbol;Acc:1565760]	yes|up	1
ENSRNOG00000017981	Mcm10	minichromosome maintenance 10 replication initiation factor [Source:RGD Symbol;Acc:1311330]	yes|down	1
ENSRNOG00000017980	Itgal	integrin subunit alpha L [Source:RGD Symbol;Acc:631424]	yes|down	1
ENSRNOG00000018735	Cd74	CD74 molecule [Source:RGD Symbol;Acc:2313]	yes|down	1
ENSRNOG00000016512	Sema3b	semaphorin 3B [Source:RGD Symbol;Acc:1310079]	yes|up	1
ENSRNOG00000047080	Gng4	G protein subunit gamma 4 [Source:RGD Symbol;Acc:620806]	yes|up	1
ENSRNOG00000007129	Cd8b	CD8b molecule [Source:RGD Symbol;Acc:2317]	yes|down	1
ENSRNOG00000019435	Psd	pleckstrin and Sec7 domain containing [Source:RGD Symbol;Acc:620297]	yes|up	1
ENSRNOG00000061304	Atp2b3	ATPase plasma membrane Ca2+ transporting 3 [Source:RGD Symbol;Acc:621304]	yes|up	1
ENSRNOG00000034266	Ccdc63	coiled-coil domain containing 63 [Source:RGD Symbol;Acc:1562334]	yes|up	1
ENSRNOG00000008217	Madcam1	mucosal vascular addressin cell adhesion molecule 1 [Source:RGD Symbol;Acc:3029]	yes|down	1
ENSRNOG00000012674	Adrb3	adrenoceptor beta 3 [Source:RGD Symbol;Acc:2061]	yes|up	1
ENSRNOG00000019850	Speg	striated muscle enriched protein kinase [Source:RGD Symbol;Acc:2124]	yes|up	1
ENSRNOG00000007014	Cnksr2	connector enhancer of kinase suppressor of Ras 2 [Source:RGD Symbol;Acc:708454]	yes|up	1
ENSRNOG00000023664	Lepr	leptin receptor [Source:RGD Symbol;Acc:3001]	yes|up	1
ENSRNOG00000026293	Jun	Jun proto-oncogene, AP-1 transcription factor subunit [Source:RGD Symbol;Acc:2943]	yes|up	1
ENSRNOG00000008676	Emp1	epithelial membrane protein 1 [Source:RGD Symbol;Acc:2552]	yes|up	1
ENSRNOG00000030462	Ostn	osteocrin [Source:RGD Symbol;Acc:1303110]	yes|down	1
ENSRNOG00000015248	Abca12	ATP binding cassette subfamily A member 12 [Source:RGD Symbol;Acc:1304586]	yes|up	1
ENSRNOG00000017850	Dctpp1	dCTP pyrophosphatase 1 [Source:RGD Symbol;Acc:620933]	yes|down	1
ENSRNOG00000060655	AABR07006713.1		yes|up	1
ENSRNOG00000001989	Alcam	activated leukocyte cell adhesion molecule [Source:RGD Symbol;Acc:619972]	yes|up	1
ENSRNOG00000055512	Hist1h2bk	histone cluster 1 H2B family member k [Source:RGD Symbol;Acc:1593016]	yes|down	1
ENSRNOG00000015082	Nlrp10	NLR family, pyrin domain containing 10 [Source:RGD Symbol;Acc:1307387]	yes|down	1
ENSRNOG00000055451	Gcnt4	glucosaminyl (N-acetyl) transferase 4, core 2 (beta-1,6-N-acetylglucosaminyltransferase) [Source:MGI Symbol;Acc:MGI:2684919]	yes|up	1
ENSRNOG00000012988	Lix1	limb and CNS expressed 1 [Source:RGD Symbol;Acc:1309454]	yes|up	1
ENSRNOG00000049605	Zfp296	zinc finger protein 296 [Source:RGD Symbol;Acc:1595818]	yes|down	1
ENSRNOG00000025584	Agap2	ArfGAP with GTPase domain, ankyrin repeat and PH domain 2 [Source:RGD Symbol;Acc:628844]	yes|down	1
ENSRNOG00000022919	Chst8	carbohydrate sulfotransferase 8 [Source:RGD Symbol;Acc:1308979]	yes|down	1
ENSRNOG00000008919	Arpp21	cAMP regulated phosphoprotein 21 [Source:RGD Symbol;Acc:1593239]	yes|down	1
ENSRNOG00000025624	Arhgap20	Rho GTPase activating protein 20 [Source:RGD Symbol;Acc:1303160]	yes|up	1
ENSRNOG00000024221	Mettl24	methyltransferase like 24 [Source:RGD Symbol;Acc:1564857]	yes|up	1
ENSRNOG00000019518	Pde4c	phosphodiesterase 4C [Source:RGD Symbol;Acc:727918]	yes|up	1
ENSRNOG00000025589	Jph4	junctophilin 4 [Source:RGD Symbol;Acc:1303170]	yes|up	1
ENSRNOG00000013752	Elavl3	ELAV like RNA binding protein 3 [Source:RGD Symbol;Acc:628892]	yes|up	1
ENSRNOG00000025235	Tmem130	transmembrane protein 130 [Source:RGD Symbol;Acc:1563248]	yes|up	1
ENSRNOG00000022136	LOC685680	similar to TPA-induced transmembrane protein [Source:RGD Symbol;Acc:1591333]	yes|up	1
ENSRNOG00000021987	Tnfrsf17	TNF receptor superfamily member 17 [Source:RGD Symbol;Acc:1304703]	yes|down	1
ENSRNOG00000006631	Sema3e	semaphorin 3E [Source:RGD Symbol;Acc:1310973]	yes|up	1
ENSRNOG00000007332	Sstr3	somatostatin receptor 3 [Source:RGD Symbol;Acc:620308]	yes|down	1
ENSRNOG00000007331	Rragd	Ras-related GTP binding D [Source:RGD Symbol;Acc:1310007]	yes|up	1
ENSRNOG00000021248	Cdc25b	cell division cycle 25B [Source:RGD Symbol;Acc:621500]	yes|down	1
ENSRNOG00000006639	Scn9a	sodium voltage-gated channel alpha subunit 9 [Source:RGD Symbol;Acc:69368]	yes|up	1
ENSRNOG00000007490	Gabrr2	gamma-aminobutyric acid type A receptor rho 2 subunit [Source:RGD Symbol;Acc:61902]	yes|down	1
ENSRNOG00000014441	Krt16	keratin 16 [Source:RGD Symbol;Acc:1590901]	yes|up	1
ENSRNOG00000013850	Hes5	hes family bHLH transcription factor 5 [Source:RGD Symbol;Acc:621340]	yes|down	1
ENSRNOG00000024729	Pax5	paired box 5 [Source:RGD Symbol;Acc:1565236]	yes|down	1
ENSRNOG00000022012	Tnfrsf18	TNF receptor superfamily member 18 [Source:RGD Symbol;Acc:1565872]	yes|down	1
ENSRNOG00000000588	Slc16a10	solute carrier family 16 member 10 [Source:RGD Symbol;Acc:69197]	yes|down	1
ENSRNOG00000021062	Fxyd5	FXYD domain-containing ion transport regulator 5 [Source:RGD Symbol;Acc:620827]	yes|down	1
ENSRNOG00000048870	St6galnac4	ST6 N-acetylgalactosaminide alpha-2,6-sialyltransferase 4 [Source:RGD Symbol;Acc:1303005]	yes|down	1
ENSRNOG00000042137	Tmem173	transmembrane protein 173 [Source:RGD Symbol;Acc:1562552]	yes|down	1
ENSRNOG00000015774	Mreg	melanoregulin [Source:RGD Symbol;Acc:1562333]	yes|down	1
ENSRNOG00000003031	Atp2b4	ATPase plasma membrane Ca2+ transporting 4 [Source:RGD Symbol;Acc:621305]	yes|up	1
ENSRNOG00000002350	Eaf2	ELL associated factor 2 [Source:RGD Symbol;Acc:628879]	yes|down	1
ENSRNOG00000025059	Nxph4	neurexophilin 4 [Source:RGD Symbol;Acc:628723]	yes|down	1
ENSRNOG00000007422	Vav2	vav guanine nucleotide exchange factor 2 [Source:RGD Symbol;Acc:1306285]	yes|down	1
ENSRNOG00000024707	Tp73	tumor protein p73 [Source:RGD Symbol;Acc:1307083]	yes|down	1
ENSRNOG00000020125	AABR07002700.1	CD79a molecule [Source:NCBI gene;Acc:100913063]	yes|down	1
ENSRNOG00000061085	Fancd2	FA complementation group D2 [Source:RGD Symbol;Acc:1303172]	yes|down	1
ENSRNOG00000013535	Cdh6	cadherin 6 [Source:RGD Symbol;Acc:2322]	yes|up	1
ENSRNOG00000001313	Gnaz	G protein subunit alpha z [Source:RGD Symbol;Acc:2717]	yes|up	1
ENSRNOG00000046050	Dennd1c	DENN/MADD domain containing 1C [Source:MGI Symbol;Acc:MGI:1918035]	yes|down	1
ENSRNOG00000046053	Nudt10	nudix (nucleoside diphosphate linked moiety X)-type motif 10 [Source:RGD Symbol;Acc:1564763]	yes|up	1
ENSRNOG00000000768	Ubd	ubiquitin D [Source:RGD Symbol;Acc:69418]	yes|down	1
ENSRNOG00000004861	Itga4	integrin subunit alpha 4 [Source:RGD Symbol;Acc:1593249]	yes|down	1
ENSRNOG00000000632	Cdk1	cyclin-dependent kinase 1 [Source:RGD Symbol;Acc:2319]	yes|down	1
ENSRNOG00000000634	Cabcoco1	ciliary associated calcium binding coiled-coil 1 [Source:RGD Symbol;Acc:1306739]	yes|down	1
ENSRNOG00000022982	Gal3st2	galactose-3-O-sulfotransferase 2 [Source:RGD Symbol;Acc:1593854]	yes|down	1
ENSRNOG00000051999	AABR07060352.1		yes|down	1
ENSRNOG00000038336	AABR07061003.1		yes|down	1
ENSRNOG00000002599	Grap	GRB2-related adaptor protein [Source:RGD Symbol;Acc:1306884]	yes|down	1
ENSRNOG00000013241	Cyp2c24	cytochrome P450, family 2, subfamily c, polypeptide 24 [Source:RGD Symbol;Acc:1563697]	yes|up	1
ENSRNOG00000022822	Fam169b	family with sequence similarity 169, member B [Source:RGD Symbol;Acc:1585883]	yes|down	1
ENSRNOG00000011989	Vat1l	vesicle amine transport 1-like [Source:RGD Symbol;Acc:1598315]	yes|up	1
ENSRNOG00000020997	Ms4a4c	membrane-spanning 4-domains, subfamily A, member 4C [Source:RGD Symbol;Acc:1583863]	yes|down	1
ENSRNOG00000029535	Nrbp2	nuclear receptor binding protein 2 [Source:RGD Symbol;Acc:1591749]	yes|up	1
ENSRNOG00000056892	AABR07017868.4		yes|down	1
ENSRNOG00000001369	Oas1a	2'-5' oligoadenylate synthetase 1A [Source:RGD Symbol;Acc:621760]	yes|up	1
ENSRNOG00000016782	Tnfrsf8	TNF receptor superfamily member 8 [Source:RGD Symbol;Acc:3879]	yes|down	1
ENSRNOG00000007687	Sema7a	semaphorin 7A (John Milton Hagen blood group) [Source:RGD Symbol;Acc:1305192]	yes|down	1
ENSRNOG00000006741	Podnl1	podocan-like 1 [Source:RGD Symbol;Acc:1307753]	yes|down	1
ENSRNOG00000001367	Gpc2	glypican 2 [Source:RGD Symbol;Acc:621363]	yes|up	1
ENSRNOG00000005018	Scn2a	sodium voltage-gated channel alpha subunit 2 [Source:RGD Symbol;Acc:3632]	yes|up	1
ENSRNOG00000056179	AABR07061072.1		yes|down	1
ENSRNOG00000001005	Fcer2	Fc fragment of IgE receptor II [Source:RGD Symbol;Acc:619997]	yes|down	1
ENSRNOG00000053771	Itprip	inositol 1,4,5-trisphosphate receptor interacting protein [Source:RGD Symbol;Acc:6488464]	yes|down	1
ENSRNOG00000020873	Nphs1	NPHS1 nephrin [Source:RGD Symbol;Acc:620460]	yes|down	1
ENSRNOG00000056172	RF00002		yes|down	1
ENSRNOG00000015867	Chst9	carbohydrate sulfotransferase 9 [Source:RGD Symbol;Acc:1307302]	yes|up	1
ENSRNOG00000008479	Slc8a1	solute carrier family 8 member A1 [Source:RGD Symbol;Acc:3717]	yes|up	1
ENSRNOG00000051907	AABR07017818.1	mCG140239-like [Source:NCBI gene;Acc:100362949]	yes|down	1
ENSRNOG00000051906	AABR07035561.2		yes|down	1
ENSRNOG00000001480	Ncf1	neutrophil cytosolic factor 1 [Source:RGD Symbol;Acc:61307]	yes|down	1
ENSRNOG00000006595	Htr3a	5-hydroxytryptamine receptor 3A [Source:RGD Symbol;Acc:61818]	yes|up	1
ENSRNOG00000007906	Bub1b	BUB1 mitotic checkpoint serine/threonine kinase B [Source:RGD Symbol;Acc:619791]	yes|down	1
ENSRNOG00000034031	Vstm2l	V-set and transmembrane domain containing 2 like [Source:RGD Symbol;Acc:1305725]	yes|up	1
ENSRNOG00000051867	Zfp600	zinc finger protein 600 [Source:RGD Symbol;Acc:9286049]	yes|up	1
ENSRNOG00000013269	Tnfsf10	TNF superfamily member 10 [Source:RGD Symbol;Acc:628734]	yes|up	1
ENSRNOG00000028077	Cfap44	cilia and flagella associated protein 44 [Source:RGD Symbol;Acc:1559942]	yes|down	1
ENSRNOG00000028616	Pck1	phosphoenolpyruvate carboxykinase 1 [Source:RGD Symbol;Acc:3267]	yes|up	1
ENSRNOG00000038035	Kif4a	kinesin family member 4A [Source:RGD Symbol;Acc:620526]	yes|down	1
ENSRNOG00000001711	Hrasls	HRAS-like suppressor [Source:RGD Symbol;Acc:1309485]	yes|up	1
ENSRNOG00000017226	Slc2a4	solute carrier family 2 member 4 [Source:RGD Symbol;Acc:2711]	yes|up	1
ENSRNOG00000050482	Dbf4	DBF4 zinc finger [Source:RGD Symbol;Acc:1305854]	yes|down	1
ENSRNOG00000057755	NEWGENE_1304700	N-deacetylase/N-sulfotransferase (heparan glucosaminyl) 2 [Source:RGD Symbol;Acc:9443007]	yes|down	1
ENSRNOG00000001262	LOC108348157	speriolin-like protein [Source:RGD Symbol;Acc:11505374]	yes|up	1
ENSRNOG00000004841	Akap6	A-kinase anchoring protein 6 [Source:RGD Symbol;Acc:69412]	yes|up	1
ENSRNOG00000050413	Samd15	sterile alpha motif domain containing 15 [Source:RGD Symbol;Acc:1589368]	yes|down	1
ENSRNOG00000012965	Themis2	thymocyte selection associated family member 2 [Source:RGD Symbol;Acc:1561016]	yes|down	1
ENSRNOG00000002278	Tec	tec protein tyrosine kinase [Source:RGD Symbol;Acc:620973]	yes|down	1
ENSRNOG00000009533	Erich3	glutamate rich 3 [Source:MGI Symbol;Acc:MGI:1919095]	yes|up	1
ENSRNOG00000051237	AC120712.3	limkain b1 pseudo [Source:NCBI gene;Acc:361559]	yes|up	1
ENSRNOG00000009531	Col9a3	collagen type IX alpha 3 chain [Source:RGD Symbol;Acc:1310255]	yes|down	1
ENSRNOG00000013321	Dock11	dedicator of cytokinesis 11 [Source:RGD Symbol;Acc:1564707]	yes|down	1
ENSRNOG00000029582	Lrch2	leucine rich repeats and calponin homology domain containing 2 [Source:RGD Symbol;Acc:1590569]	yes|up	1
ENSRNOG00000007600	Igsf1	immunoglobulin superfamily, member 1 [Source:RGD Symbol;Acc:631402]	yes|up	1
ENSRNOG00000054812	AABR07017846.1		yes|down	1
ENSRNOG00000042944	Cenpw	centromere protein W [Source:RGD Symbol;Acc:1593465]	yes|down	1
ENSRNOG00000058726	AABR07054837.1		yes|up	1
ENSRNOG00000009949	Pcdh18	protocadherin 18 [Source:RGD Symbol;Acc:1305870]	yes|up	1
ENSRNOG00000029993	Kynu	kynureninase [Source:RGD Symbol;Acc:71061]	yes|down	1
ENSRNOG00000005269	Srl	sarcalumenin [Source:RGD Symbol;Acc:1306564]	yes|up	1
ENSRNOG00000001216	Trpm2	transient receptor potential cation channel, subfamily M, member 2 [Source:RGD Symbol;Acc:1311889]	yes|down	1
ENSRNOG00000057297	AC141517.1		yes|up	1
ENSRNOG00000020478	Camk4	calcium/calmodulin-dependent protein kinase IV [Source:RGD Symbol;Acc:2264]	yes|down	1
ENSRNOG00000057101	AABR07050652.1		yes|up	1
ENSRNOG00000005342	Rassf5	Ras association domain family member 5 [Source:RGD Symbol;Acc:621694]	yes|down	1
ENSRNOG00000059097	AABR07025140.1		yes|up	1
ENSRNOG00000004168	Slc35e4	solute carrier family 35, member E4 [Source:RGD Symbol;Acc:708484]	yes|up	1
ENSRNOG00000009649	Slitrk5	SLIT and NTRK-like family, member 5 [Source:RGD Symbol;Acc:1310957]	yes|up	1
ENSRNOG00000054319	LOC103690128	smoothelin-like [Source:RGD Symbol;Acc:9196123]	yes|up	1
ENSRNOG00000009761	Tmod1	tropomodulin 1 [Source:RGD Symbol;Acc:3874]	yes|up	1
ENSRNOG00000031431	Cdca8	cell division cycle associated 8 [Source:RGD Symbol;Acc:1566306]	yes|down	1
ENSRNOG00000019495	Gbx2	gastrulation brain homeobox 2 [Source:RGD Symbol;Acc:621866]	yes|down	1
ENSRNOG00000009385	Pik3cg	phosphatidylinositol-4,5-bisphosphate 3-kinase, catalytic subunit gamma [Source:RGD Symbol;Acc:1306468]	yes|down	1
ENSRNOG00000038948	Stab2	stabilin 2 [Source:RGD Symbol;Acc:628822]	yes|down	1
ENSRNOG00000016846	Pik3cd	phosphatidylinositol-4,5-bisphosphate 3-kinase, catalytic subunit delta [Source:RGD Symbol;Acc:1310990]	yes|down	1
ENSRNOG00000009790	Kcnk3	potassium two pore domain channel subfamily K member 3 [Source:RGD Symbol;Acc:61997]	yes|up	1
ENSRNOG00000017539	Mmp9	matrix metallopeptidase 9 [Source:RGD Symbol;Acc:621320]	yes|down	1
ENSRNOG00000032828	Mapk8ip2	mitogen-activated protein kinase 8 interacting protein 2 [Source:RGD Symbol;Acc:1309727]	yes|up	1
ENSRNOG00000028910	Ccdc9b	coiled-coil domain containing 9B [Source:RGD Symbol;Acc:1565536]	yes|up	1
ENSRNOG00000004118	Frmpd4	FERM and PDZ domain containing 4 [Source:RGD Symbol;Acc:1566031]	yes|up	1
ENSRNOG00000062090	Sry	sex determining region Y [Source:RGD Symbol;Acc:3759]	yes|up	1
ENSRNOG00000051120	Il17d	interleukin 17D [Source:RGD Symbol;Acc:1595926]	yes|up	1
ENSRNOG00000004110	Trib2	tribbles pseudokinase 2 [Source:RGD Symbol;Acc:1564451]	yes|down	1
ENSRNOG00000009369	Tor4a	torsin family 4, member A [Source:RGD Symbol;Acc:1308019]	yes|down	1
ENSRNOG00000010625	Dnmt3b	DNA methyltransferase 3 beta [Source:RGD Symbol;Acc:1303274]	yes|down	1
ENSRNOG00000008312	Stra6	stimulated by retinoic acid 6 [Source:RGD Symbol;Acc:1307551]	yes|down	1
ENSRNOG00000010210	Slc7a11	solute carrier family 7 member 11 [Source:RGD Symbol;Acc:1309275]	yes|down	1
ENSRNOG00000022792	Lamp3	lysosomal-associated membrane protein 3 [Source:RGD Symbol;Acc:1307928]	yes|down	1
ENSRNOG00000058352	AABR07065699.4		yes|down	1
ENSRNOG00000029841	Cdh19	cadherin 19 [Source:RGD Symbol;Acc:1307169]	yes|up	1
ENSRNOG00000031232	Nrp2	neuropilin 2 [Source:RGD Symbol;Acc:621442]	yes|up	1
ENSRNOG00000016837	Ckm	creatine kinase, M-type [Source:RGD Symbol;Acc:2358]	yes|up	1
ENSRNOG00000012815	Chst10	carbohydrate sulfotransferase 10 [Source:RGD Symbol;Acc:621216]	yes|down	1
ENSRNOG00000061968	AABR07064878.1		yes|up	1
ENSRNOG00000005747	Il27ra	interleukin 27 receptor subunit alpha [Source:RGD Symbol;Acc:1305029]	yes|down	1
ENSRNOG00000057996	Phactr3	phosphatase and actin regulator 3 [Source:RGD Symbol;Acc:1303029]	yes|up	1
ENSRNOG00000006996	Mms22l	MMS22-like, DNA repair protein [Source:RGD Symbol;Acc:1304693]	yes|down	1
ENSRNOG00000000105	Cplx2	complexin 2 [Source:RGD Symbol;Acc:70945]	yes|up	1
ENSRNOG00000002276	Phf6	PHD finger protein 6 [Source:RGD Symbol;Acc:2323526]	yes|down	1
ENSRNOG00000047951	LOC103689922	homeobox protein Hox-A5 [Source:RGD Symbol;Acc:9260675]	yes|up	1
ENSRNOG00000000562	Prf1	perforin 1 [Source:RGD Symbol;Acc:708463]	yes|down	1
ENSRNOG00000056382	RF00411	small nucleolar RNA, H/ACA box 9 [Source:MGI Symbol;Acc:MGI:5452234]	yes|down	1
ENSRNOG00000015370	Slc35g2	solute carrier family 35, member G2 [Source:RGD Symbol;Acc:1306109]	yes|up	1
ENSRNOG00000003585	Sytl5	synaptotagmin-like 5 [Source:RGD Symbol;Acc:631342]	yes|up	1
ENSRNOG00000010447	Tmod2	tropomodulin 2 [Source:RGD Symbol;Acc:61948]	yes|up	1
ENSRNOG00000015478	Aicda	activation-induced cytidine deaminase [Source:RGD Symbol;Acc:1303222]	yes|down	1
ENSRNOG00000055689	AABR07052611.2		yes|down	1
ENSRNOG00000011500	Pou2af1	POU class 2 associating factor 1 [Source:RGD Symbol;Acc:1594728]	yes|down	1
ENSRNOG00000023809	Opcml	opioid binding protein/cell adhesion molecule-like [Source:RGD Symbol;Acc:620635]	yes|up	1
ENSRNOG00000037076	LOC689757	similar to osteoclast inhibitory lectin [Source:RGD Symbol;Acc:1588731]	yes|down	1
ENSRNOG00000049547	Tnfsf11	TNF superfamily member 11 [Source:RGD Symbol;Acc:620784]	yes|down	1
ENSRNOG00000018316	Grap2	GRB2-related adaptor protein 2 [Source:MGI Symbol;Acc:MGI:1333842]	yes|down	1
ENSRNOG00000017659	Hs3st2	heparan sulfate-glucosamine 3-sulfotransferase 2 [Source:RGD Symbol;Acc:727787]	yes|up	1
ENSRNOG00000062144	AABR07035955.1		yes|down	1
ENSRNOG00000017712	Cartpt	CART prepropeptide [Source:RGD Symbol;Acc:2272]	yes|up	1
ENSRNOG00000051194	LOC108352134	uncharacterized LOC108352134 [Source:RGD Symbol;Acc:11507030]	yes|up	1
ENSRNOG00000004180	Fam19a2	family with sequence similarity 19 member A2, C-C motif chemokine like [Source:RGD Symbol;Acc:1589429]	yes|up	1
ENSRNOG00000005515	Rhbdl3	rhomboid like 3 [Source:RGD Symbol;Acc:1311901]	yes|up	1
ENSRNOG00000053728	AABR07006724.1		yes|up	1
ENSRNOG00000004029	Nectin4	nectin cell adhesion molecule 4 [Source:RGD Symbol;Acc:1559826]	yes|down	1
ENSRNOG00000004026	Atp2b1	ATPase plasma membrane Ca2+ transporting 1 [Source:RGD Symbol;Acc:621303]	yes|up	1
ENSRNOG00000047505	Tubb4a	tubulin, beta 4A class IVa [Source:RGD Symbol;Acc:619730]	yes|up	1
ENSRNOG00000026091	Slc10a4	solute carrier family 10, member 4 [Source:RGD Symbol;Acc:1309536]	yes|up	1
ENSRNOG00000011161	Slc2a12	solute carrier family 2 member 12 [Source:RGD Symbol;Acc:1310175]	yes|up	1
ENSRNOG00000000528	Fgd2	FYVE, RhoGEF and PH domain containing 2 [Source:RGD Symbol;Acc:1309840]	yes|down	1
ENSRNOG00000032178	Cenpa	centromere protein A [Source:RGD Symbol;Acc:1563607]	yes|down	1
ENSRNOG00000012172	Spi1	Spi-1 proto-oncogene [Source:RGD Symbol;Acc:1359607]	yes|down	1
ENSRNOG00000017159	Dsc3	desmocollin 3 [Source:RGD Symbol;Acc:1311782]	yes|down	1
ENSRNOG00000016420	Serpinb6b	serine (or cysteine) peptidase inhibitor, clade B, member 6b [Source:RGD Symbol;Acc:1310452]	yes|down	1
ENSRNOG00000059001	AABR07017737.1		yes|down	1
ENSRNOG00000002659	Ciita	class II, major histocompatibility complex, transactivator [Source:RGD Symbol;Acc:619813]	yes|down	1
ENSRNOG00000033815	AC142181.1		yes|down	1
ENSRNOG00000019043	NEWGENE_1311658	programmed cell death 1 [Source:RGD Symbol;Acc:9464499]	yes|down	1
ENSRNOG00000045908	AABR07044416.1		yes|down	1
ENSRNOG00000019046	Reg4	regenerating family member 4 [Source:RGD Symbol;Acc:1303341]	yes|up	1
ENSRNOG00000005872	Tcf7	transcription factor 7 [Source:RGD Symbol;Acc:1305894]	yes|down	1
ENSRNOG00000059073	Slamf1	signaling lymphocytic activation molecule family member 1 [Source:RGD Symbol;Acc:1560634]	yes|down	1
ENSRNOG00000026056	Ccnb1ip1	cyclin B1 interacting protein 1 [Source:RGD Symbol;Acc:1561930]	yes|down	1
ENSRNOG00000056721	Fancm	FA complementation group M [Source:RGD Symbol;Acc:1307897]	yes|down	1
ENSRNOG00000022499	Sgo1	shugoshin 1 [Source:RGD Symbol;Acc:1593238]	yes|down	1
ENSRNOG00000061544	Spock2	SPARC/osteonectin, cwcv and kazal like domains proteoglycan 2 [Source:RGD Symbol;Acc:1308568]	yes|up	1
ENSRNOG00000008165	Tpx2	TPX2, microtubule nucleation factor [Source:RGD Symbol;Acc:1311894]	yes|down	1
ENSRNOG00000000618	Mdga2	MAM domain containing glycosylphosphatidylinositol anchor 2 [Source:RGD Symbol;Acc:735131]	yes|up	1
ENSRNOG00000024882	Pax1	paired box 1 [Source:RGD Symbol;Acc:1588548]	yes|down	1
ENSRNOG00000008169	Slc24a2	solute carrier family 24 member 2 [Source:RGD Symbol;Acc:628650]	yes|up	1
ENSRNOG00000022712	Bend7	BEN domain containing 7 [Source:RGD Symbol;Acc:1305898]	yes|up	1
ENSRNOG00000003515	Ephx1	epoxide hydrolase 1 [Source:RGD Symbol;Acc:2557]	yes|up	1
ENSRNOG00000014378	Il1r2	interleukin 1 receptor type 2 [Source:RGD Symbol;Acc:621147]	yes|down	1
ENSRNOG00000052981	AABR07058464.1		yes|up	1
ENSRNOG00000012045	Adgrb3	adhesion G protein-coupled receptor B3 [Source:RGD Symbol;Acc:1309703]	yes|up	1
ENSRNOG00000012060	Gucy1b1	guanylate cyclase 1 soluble subunit beta 1 [Source:RGD Symbol;Acc:2769]	yes|up	1
ENSRNOG00000003732	Flrt2	fibronectin leucine rich transmembrane protein 2 [Source:RGD Symbol;Acc:1308574]	yes|up	1
ENSRNOG00000046848	PCOLCE2	procollagen C-endopeptidase enhancer 2 [Source:RGD Symbol;Acc:1595195]	yes|up	1
ENSRNOG00000032778	Bub1	BUB1 mitotic checkpoint serine/threonine kinase [Source:RGD Symbol;Acc:1311707]	yes|down	1
ENSRNOG00000023601	Elavl4	ELAV like RNA binding protein 4 [Source:RGD Symbol;Acc:1560027]	yes|up	1
ENSRNOG00000033338	Gimap6	GTPase, IMAP family member 6 [Source:RGD Symbol;Acc:1305041]	yes|down	1
ENSRNOG00000019342	Sult1a1	sulfotransferase family 1A member 1 [Source:RGD Symbol;Acc:3767]	yes|up	1
ENSRNOG00000016525	Susd3	sushi domain containing 3 [Source:RGD Symbol;Acc:1310933]	yes|down	1
ENSRNOG00000022225	Lrrc19	leucine rich repeat containing 19 [Source:RGD Symbol;Acc:1591722]	yes|up	1
ENSRNOG00000017833	Actn2	actinin alpha 2 [Source:RGD Symbol;Acc:1308097]	yes|up	1
ENSRNOG00000022491	Wdr76	WD repeat domain 76 [Source:RGD Symbol;Acc:1309616]	yes|down	1
ENSRNOG00000008765	Zfhx4	zinc finger homeobox 4 [Source:RGD Symbol;Acc:1563022]	yes|up	1
ENSRNOG00000048166	Arhgap19	Rho GTPase activating protein 19 [Source:RGD Symbol;Acc:1593044]	yes|down	1
ENSRNOG00000022428	Flrt1	fibronectin leucine rich transmembrane protein 1 [Source:RGD Symbol;Acc:1565152]	yes|up	1
ENSRNOG00000022429	Minar2	membrane integral NOTCH2 associated receptor 2 [Source:RGD Symbol;Acc:1312005]	yes|up	1
ENSRNOG00000008761	Ncs1	neuronal calcium sensor 1 [Source:RGD Symbol;Acc:68417]	yes|up	1
ENSRNOG00000048161	Tlr9	toll-like receptor 9 [Source:RGD Symbol;Acc:631352]	yes|down	1
ENSRNOG00000008088	Btbd3	BTB domain containing 3 [Source:RGD Symbol;Acc:1311623]	yes|up	1
ENSRNOG00000047002	Fstl5	follistatin-like 5 [Source:RGD Symbol;Acc:1306858]	yes|up	1
ENSRNOG00000060703	Troap	trophinin associated protein [Source:RGD Symbol;Acc:1306870]	yes|down	1
ENSRNOG00000019687	Art2b	ADP-ribosyltransferase 2b [Source:RGD Symbol;Acc:3521]	yes|down	1
ENSRNOG00000019293	AABR07006025.1		yes|down	1
ENSRNOG00000001851	Far2	fatty acyl CoA reductase 2 [Source:RGD Symbol;Acc:1565966]	yes|down	1
ENSRNOG00000003244	Ltc4s	leukotriene C4 synthase [Source:RGD Symbol;Acc:620677]	yes|up	1
ENSRNOG00000001854	Tmtc1	transmembrane and tetratricopeptide repeat containing 1 [Source:RGD Symbol;Acc:1564868]	yes|up	1
ENSRNOG00000015156	Gal	galanin and GMAP prepropeptide [Source:RGD Symbol;Acc:61954]	yes|up	1
ENSRNOG00000002773	Rgs4	regulator of G-protein signaling 4 [Source:RGD Symbol;Acc:3567]	yes|up	1
ENSRNOG00000046921	AABR07034986.2		yes|up	1
ENSRNOG00000001859	Sdf2l1	stromal cell-derived factor 2-like 1 [Source:RGD Symbol;Acc:1585844]	yes|down	1
ENSRNOG00000021833	Myrfl	myelin regulatory factor-like [Source:RGD Symbol;Acc:1562127]	yes|up	1
ENSRNOG00000000001	AABR07013255.1		yes|down	1
ENSRNOG00000019660	Spib	Spi-B transcription factor [Source:RGD Symbol;Acc:1565899]	yes|down	1
ENSRNOG00000012208	Itgb7	integrin subunit beta 7 [Source:RGD Symbol;Acc:2929]	yes|down	1
ENSRNOG00000008862	Abcg4	ATP binding cassette subfamily G member 4 [Source:RGD Symbol;Acc:1305840]	yes|up	1
ENSRNOG00000046699	Slpi	secretory leukocyte peptidase inhibitor [Source:RGD Symbol;Acc:621768]	yes|down	1
ENSRNOG00000012611	Lpxn	leupaxin [Source:RGD Symbol;Acc:1304981]	yes|down	1
ENSRNOG00000028266	Lrrc55	leucine rich repeat containing 55 [Source:RGD Symbol;Acc:1561726]	yes|up	1
ENSRNOG00000052695	LOC102549869	uncharacterized LOC102549869 [Source:RGD Symbol;Acc:7702167]	yes|down	1
ENSRNOG00000047349	AABR07006269.1		yes|down	1
ENSRNOG00000014902	Stx11	syntaxin 11 [Source:RGD Symbol;Acc:1304744]	yes|down	1
ENSRNOG00000021334	Lag3	lymphocyte activating 3 [Source:RGD Symbol;Acc:1302990]	yes|down	1
ENSRNOG00000012175	Nfatc2	nuclear factor of activated T-cells 2 [Source:RGD Symbol;Acc:1307690]	yes|down	1
ENSRNOG00000022030	Aunip	aurora kinase A and ninein interacting protein [Source:RGD Symbol;Acc:1589922]	yes|down	1
ENSRNOG00000008996	Dpysl5	dihydropyrimidinase-like 5 [Source:RGD Symbol;Acc:620467]	yes|up	1
ENSRNOG00000008588	Batf	basic leucine zipper ATF-like transcription factor [Source:RGD Symbol;Acc:1304923]	yes|down	1
ENSRNOG00000008223	Cnr1	cannabinoid receptor 1 [Source:RGD Symbol;Acc:2369]	yes|up	1
ENSRNOG00000012924	Nemp2	nuclear envelope integral membrane protein 2 [Source:RGD Symbol;Acc:1560421]	yes|down	1
ENSRNOG00000022669	Cd177	CD177 molecule [Source:RGD Symbol;Acc:1562941]	yes|down	1
ENSRNOG00000006328	Wwp1	WW domain containing E3 ubiquitin protein ligase 1 [Source:RGD Symbol;Acc:1311734]	yes|up	1
ENSRNOG00000006327	Rcc2	regulator of chromosome condensation 2 [Source:RGD Symbol;Acc:1309986]	yes|down	1
ENSRNOG00000021903	Atad5	ATPase family, AAA domain containing 5 [Source:RGD Symbol;Acc:1561464]	yes|down	1
ENSRNOG00000032703	Rasgrp3	RAS guanyl releasing protein 3 [Source:RGD Symbol;Acc:1304612]	yes|down	1
ENSRNOG00000003748	RGD1565785	similar to chromosome X open reading frame 21 [Source:RGD Symbol;Acc:1565785]	yes|down	1
ENSRNOG00000033658	Kntc1	kinetochore associated 1 [Source:RGD Symbol;Acc:1307905]	yes|down	1
ENSRNOG00000012199	Sox2	SRY box 2 [Source:RGD Symbol;Acc:1565646]	yes|up	1
ENSRNOG00000052064	Parvg	parvin, gamma [Source:RGD Symbol;Acc:1597417]	yes|down	1
ENSRNOG00000012197	Bpifb2	BPI fold containing family B, member 2 [Source:RGD Symbol;Acc:1310866]	yes|up	1
ENSRNOG00000008575	Aoc1	amine oxidase, copper containing 1 [Source:RGD Symbol;Acc:61296]	yes|up	1
ENSRNOG00000047307	Cntfr	ciliary neurotrophic factor receptor [Source:RGD Symbol;Acc:1303100]	yes|up	1
ENSRNOG00000007350	Rac2	Rac family small GTPase 2 [Source:RGD Symbol;Acc:1307568]	yes|down	1
ENSRNOG00000007989	Chst1	carbohydrate sulfotransferase 1 [Source:RGD Symbol;Acc:1308142]	yes|down	1
ENSRNOG00000002343	Uchl1	ubiquitin C-terminal hydrolase L1 [Source:RGD Symbol;Acc:3928]	yes|up	1
ENSRNOG00000007456	Calb1	calbindin 1 [Source:RGD Symbol;Acc:69340]	yes|up	1
ENSRNOG00000042950	Slc5a9	solute carrier family 5 member 9 [Source:RGD Symbol;Acc:1311383]	yes|up	1
ENSRNOG00000007981	Klhl23	kelch-like family member 23 [Source:RGD Symbol;Acc:1307166]	yes|up	1
ENSRNOG00000021345	Timd2	T-cell immunoglobulin and mucin domain containing 2 [Source:RGD Symbol;Acc:1359571]	yes|down	1
ENSRNOG00000021589	Nexmif	neurite extension and migration factor [Source:RGD Symbol;Acc:1561931]	yes|up	1
ENSRNOG00000024452	Carmil2	capping protein regulator and myosin 1 linker 2 [Source:RGD Symbol;Acc:1562390]	yes|down	1
ENSRNOG00000039494	Aass	aminoadipate-semialdehyde synthase [Source:RGD Symbol;Acc:1310811]	yes|up	1
ENSRNOG00000013484	Gsta1	glutathione S-transferase alpha 1 [Source:RGD Symbol;Acc:2753]	yes|up	1
ENSRNOG00000013954	Alpl	alkaline phosphatase, biomineralization associated [Source:RGD Symbol;Acc:2100]	yes|down	1
ENSRNOG00000013529	Stk4	serine/threonine kinase 4 [Source:RGD Symbol;Acc:1312035]	yes|down	1
ENSRNOG00000006108	Gngt2	G protein subunit gamma transducin 2 [Source:RGD Symbol;Acc:1591007]	yes|down	1
ENSRNOG00000006198	Prr11	proline rich 11 [Source:RGD Symbol;Acc:1561541]	yes|down	1
ENSRNOG00000046745	LOC691918	similar to Centrosomal protein of 27 kDa (Cep27 protein) [Source:RGD Symbol;Acc:1593362]	yes|up	1
ENSRNOG00000021137	Kctd15	potassium channel tetramerization domain containing 15 [Source:RGD Symbol;Acc:1583737]	yes|up	1
ENSRNOG00000046667	Fosb	FosB proto-oncogene, AP-1 transcription factor subunit [Source:RGD Symbol;Acc:1308198]	yes|up	1
ENSRNOG00000046196	Icos	inducible T-cell co-stimulator [Source:RGD Symbol;Acc:620123]	yes|down	1
ENSRNOG00000046197	AABR07017658.1		yes|down	1
ENSRNOG00000029366	Prrt2	proline-rich transmembrane protein 2 [Source:RGD Symbol;Acc:1564195]	yes|up	1
ENSRNOG00000003298	Cd247	Cd247 molecule [Source:RGD Symbol;Acc:2305]	yes|down	1
ENSRNOG00000002582	Hand1	heart and neural crest derivatives expressed 1 [Source:RGD Symbol;Acc:621206]	yes|up	1
ENSRNOG00000042758	Tmem243	transmembrane protein 243 [Source:RGD Symbol;Acc:1562351]	yes|down	1
ENSRNOG00000003296	Dck	deoxycytidine kinase [Source:RGD Symbol;Acc:620667]	yes|down	1
ENSRNOG00000042753	Fgf13	fibroblast growth factor 13 [Source:RGD Symbol;Acc:620164]	yes|up	1
ENSRNOG00000013552	Scd	stearoyl-CoA desaturase [Source:RGD Symbol;Acc:621176]	yes|down	1
ENSRNOG00000038129	Defb52	defensin beta 52 [Source:RGD Symbol;Acc:1565394]	yes|down	1
ENSRNOG00000006170	Bach2	BTB domain and CNC homolog 2 [Source:RGD Symbol;Acc:1562865]	yes|down	1
ENSRNOG00000013003	Srms	src-related kinase lacking C-terminal regulatory tyrosine and N-terminal myristylation sites [Source:RGD Symbol;Acc:1306602]	yes|down	1
ENSRNOG00000013554	Treml2	triggering receptor expressed on myeloid cells-like 2 [Source:RGD Symbol;Acc:1587039]	yes|down	1
ENSRNOG00000021510	Tbc1d10c	TBC1 domain family, member 10C [Source:RGD Symbol;Acc:1311490]	yes|down	1
ENSRNOG00000024569	Gimap9	GTPase, IMAP family member 9 [Source:RGD Symbol;Acc:1549762]	yes|down	1
ENSRNOG00000001374	Rasal1	RAS protein activator like 1 [Source:RGD Symbol;Acc:1311820]	yes|down	1
ENSRNOG00000006075	Fez1	fasciculation and elongation protein zeta 1 [Source:RGD Symbol;Acc:619708]	yes|up	1
ENSRNOG00000021161	Fermt3	fermitin family member 3 [Source:RGD Symbol;Acc:1310168]	yes|down	1
ENSRNOG00000020743	Cyp2s1	cytochrome P450, family 2, subfamily s, polypeptide 1 [Source:RGD Symbol;Acc:1306078]	yes|down	1
ENSRNOG00000005008	Angpt4	angiopoietin 4 [Source:RGD Symbol;Acc:1307539]	yes|down	1
ENSRNOG00000056069	Kif11	kinesin family member 11 [Source:RGD Symbol;Acc:621258]	yes|down	1
ENSRNOG00000016854	AC116220.1	leucine rich repeat containing 36 [Source:NCBI gene;Acc:361394]	yes|up	1
ENSRNOG00000003160	RragB	Ras-related GTP binding B [Source:RGD Symbol;Acc:619805]	yes|up	1
ENSRNOG00000003208	Ercc6l	ERCC excision repair 6 like, spindle assembly checkpoint helicase [Source:RGD Symbol;Acc:1565734]	yes|down	1
ENSRNOG00000036942	Tnfrsf9	TNF receptor superfamily member 9 [Source:RGD Symbol;Acc:1598208]	yes|down	1
ENSRNOG00000003207	Fmnl1	formin-like 1 [Source:RGD Symbol;Acc:1311042]	yes|down	1
ENSRNOG00000053045	Wscd2	WSC domain containing 2 [Source:RGD Symbol;Acc:1589744]	yes|up	1
ENSRNOG00000053047	Top2a	DNA topoisomerase II alpha [Source:RGD Symbol;Acc:62048]	yes|down	1
ENSRNOG00000012430	Cxcr5	C-X-C motif chemokine receptor 5 [Source:RGD Symbol;Acc:62010]	yes|down	1
ENSRNOG00000017156	Ankle1	ankyrin repeat and LEM domain containing 1 [Source:RGD Symbol;Acc:1308184]	yes|down	1
ENSRNOG00000039464	Tmem229a	transmembrane protein 229A [Source:RGD Symbol;Acc:1590212]	yes|up	1
ENSRNOG00000057443	LOC497963	similar to Nitric oxide synthase, inducible (NOS type II) (Inducible NO synthase) (Inducible NOS) (iNOS) [Source:RGD Symbol;Acc:1598227]	yes|down	1
ENSRNOG00000036659	Fn3k	fructosamine 3 kinase [Source:RGD Symbol;Acc:1559983]	yes|up	1
ENSRNOG00000027468	Slc6a15	solute carrier family 6 member 15 [Source:RGD Symbol;Acc:628664]	yes|up	1
ENSRNOG00000001457	Rfc2	replication factor C subunit 2 [Source:RGD Symbol;Acc:621198]	yes|down	1
ENSRNOG00000017333	Syt4	synaptotagmin 4 [Source:RGD Symbol;Acc:68397]	yes|up	1
ENSRNOG00000042441	LOC103690131	tumor protein D55-like [Source:RGD Symbol;Acc:9223097]	yes|down	1
ENSRNOG00000001515	Map3k20	mitogen-activated protein kinase kinase kinase 20 [Source:RGD Symbol;Acc:1561394]	yes|up	1
ENSRNOG00000001514	Cdca7	cell division cycle associated 7 [Source:RGD Symbol;Acc:1309363]	yes|down	1
ENSRNOG00000047476	Wasf1	WAS protein family, member 1 [Source:RGD Symbol;Acc:1561954]	yes|up	1
ENSRNOG00000009559	LOC103689974	tumor necrosis factor ligand superfamily member 11 [Source:RGD Symbol;Acc:9144322]	yes|down	1
ENSRNOG00000037428	Zfp605	zinc finger protein 605 [Source:RGD Symbol;Acc:2318406]	yes|up	1
ENSRNOG00000053222	AABR07052405.1		yes|up	1
ENSRNOG00000005850	Gdap1	ganglioside-induced differentiation-associated-protein 1 [Source:RGD Symbol;Acc:1309005]	yes|up	1
ENSRNOG00000005176	Map7d2	MAP7 domain containing 2 [Source:RGD Symbol;Acc:1564852]	yes|up	1
ENSRNOG00000005853	Tacr1	tachykinin receptor 1 [Source:RGD Symbol;Acc:3811]	yes|up	1
ENSRNOG00000005670	Art4	ADP-ribosyltransferase 4 [Source:RGD Symbol;Acc:1306456]	yes|down	1
ENSRNOG00000024650	Ckap2	cytoskeleton associated protein 2 [Source:RGD Symbol;Acc:1311631]	yes|down	1
ENSRNOG00000001296	P2rx7	purinergic receptor P2X 7 [Source:RGD Symbol;Acc:3241]	yes|up	1
ENSRNOG00000057214	AABR07043510.1		yes|up	1
ENSRNOG00000051802	AABR07010609.1		yes|up	1
ENSRNOG00000002164	Nmu	neuromedin U [Source:RGD Symbol;Acc:68388]	yes|up	1
ENSRNOG00000030759	Nhs	NHS actin remodeling regulator [Source:RGD Symbol;Acc:1561818]	yes|up	1
ENSRNOG00000000854	Ncr3	natural cytotoxicity triggering receptor 3 [Source:RGD Symbol;Acc:727881]	yes|down	1
ENSRNOG00000052023	AABR07002885.1	zinc finger protein 82-like [Source:NCBI gene;Acc:102547241]	yes|down	1
ENSRNOG00000014476	Evl	Enah/Vasp-like [Source:RGD Symbol;Acc:621150]	yes|down	1
ENSRNOG00000014477	Acvr2b	activin A receptor type 2B [Source:RGD Symbol;Acc:2028]	yes|up	1
ENSRNOG00000054801	AABR07057997.1		yes|up	1
ENSRNOG00000014471	B3gnt6	UDP-GlcNAc:betaGal beta-1,3-N-acetylglucosaminyltransferase 6 [Source:RGD Symbol;Acc:1310926]	yes|up	1
ENSRNOG00000013312	Kcnt2	potassium sodium-activated channel subfamily T member 2 [Source:RGD Symbol;Acc:735074]	yes|up	1
ENSRNOG00000042524	AABR07030590.1	mast cell immunoglobulin-like receptor 1 [Source:NCBI gene;Acc:59105]	yes|down	1
ENSRNOG00000018804	Ripor2	RHO family interacting cell polarization regulator 2 [Source:RGD Symbol;Acc:1306939]	yes|down	1
ENSRNOG00000058590	AABR07034739.2	lambda-chain C1-region-like [Source:NCBI gene;Acc:100361706]	yes|down	1
ENSRNOG00000051612	AABR07044570.2		yes|up	1
ENSRNOG00000006911	Sptb	spectrin, beta, erythrocytic [Source:RGD Symbol;Acc:1303243]	yes|up	1
ENSRNOG00000005214	Plek	pleckstrin [Source:RGD Symbol;Acc:1308269]	yes|down	1
ENSRNOG00000027606	Neurl1b	neuralized E3 ubiquitin protein ligase 1B [Source:RGD Symbol;Acc:1564984]	yes|up	1
ENSRNOG00000017485	Cd72	Cd72 molecule [Source:RGD Symbol;Acc:1309757]	yes|down	1
ENSRNOG00000059866	AABR07001432.1		yes|down	1
ENSRNOG00000004753	Napb	NSF attachment protein beta [Source:RGD Symbol;Acc:1589649]	yes|up	1
ENSRNOG00000014751	Ret	ret proto-oncogene [Source:RGD Symbol;Acc:3556]	yes|up	1
ENSRNOG00000000187	Csf2rb	colony stimulating factor 2 receptor beta common subunit [Source:RGD Symbol;Acc:620189]	yes|down	1
ENSRNOG00000010507	Mmp7	matrix metallopeptidase 7 [Source:RGD Symbol;Acc:3100]	yes|down	1
ENSRNOG00000037839	P2ry10	P2Y receptor family member 10 [Source:RGD Symbol;Acc:1561912]	yes|down	1
ENSRNOG00000037838	RGD1560455	similar to RIKEN cDNA A630033H20 gene [Source:RGD Symbol;Acc:1560455]	yes|down	1
ENSRNOG00000002014	Stap1	signal transducing adaptor family member 1 [Source:RGD Symbol;Acc:1311584]	yes|down	1
ENSRNOG00000056714	Sla	src-like adaptor [Source:RGD Symbol;Acc:631373]	yes|down	1
ENSRNOG00000009390	Edn2	endothelin 2 [Source:RGD Symbol;Acc:2533]	yes|up	1
ENSRNOG00000020644	Nsg2	neuronal vesicle trafficking associated 2 [Source:RGD Symbol;Acc:1563944]	yes|up	1
ENSRNOG00000061813	Ly6c	Ly6-C antigen [Source:RGD Symbol;Acc:621266]	yes|down	1
ENSRNOG00000037339	Siglec10	sialic acid binding Ig-like lectin 10 [Source:RGD Symbol;Acc:1307441]	yes|down	1
ENSRNOG00000015895	B4galt6	beta-1,4-galactosyltransferase 6 [Source:RGD Symbol;Acc:71046]	yes|up	1
ENSRNOG00000002841	Cdc42bpa	CDC42 binding protein kinase alpha [Source:RGD Symbol;Acc:621406]	yes|up	1
ENSRNOG00000005185	Nxph3	neurexophilin 3 [Source:RGD Symbol;Acc:620693]	yes|up	1
ENSRNOG00000027592	Rerg	RAS-like, estrogen-regulated, growth-inhibitor [Source:RGD Symbol;Acc:1562829]	yes|up	1
ENSRNOG00000010597	Slc5a7	solute carrier family 5 member 7 [Source:RGD Symbol;Acc:69270]	yes|up	1
ENSRNOG00000005323	AABR07064873.1		yes|up	1
ENSRNOG00000009372	Tacr3	tachykinin receptor 3 [Source:RGD Symbol;Acc:3810]	yes|up	1
ENSRNOG00000003984	Apln	apelin [Source:RGD Symbol;Acc:620672]	yes|down	1
ENSRNOG00000010592	Slc25a27	solute carrier family 25, member 27 [Source:RGD Symbol;Acc:620787]	yes|up	1
ENSRNOG00000000137	Ly86	lymphocyte antigen 86 [Source:RGD Symbol;Acc:1309936]	yes|down	1
ENSRNOG00000009076	Ttpal	alpha tocopherol transfer protein like [Source:RGD Symbol;Acc:1305754]	yes|down	1
ENSRNOG00000009074	AABR07017902.1		yes|down	1
ENSRNOG00000054437	Rel	REL proto-oncogene, NF-kB subunit [Source:RGD Symbol;Acc:1311231]	yes|down	1
ENSRNOG00000031398	Mab21l2	mab-21 like 2 [Source:RGD Symbol;Acc:1595520]	yes|up	1
ENSRNOG00000018311	Cd19	CD19 molecule [Source:RGD Symbol;Acc:1309086]	yes|down	1
ENSRNOG00000019482	Gnao1	G protein subunit alpha o1 [Source:RGD Symbol;Acc:628732]	yes|up	1
ENSRNOG00000004928	Sntg2	syntrophin, gamma 2 [Source:RGD Symbol;Acc:1311276]	yes|up	1
ENSRNOG00000004921	Nusap1	nucleolar and spindle associated protein 1 [Source:RGD Symbol;Acc:1305764]	yes|down	1
ENSRNOG00000025527	Mtcl1	microtubule crosslinking factor 1 [Source:RGD Symbol;Acc:1308319]	yes|up	1
ENSRNOG00000049491	LOC108348139	class II histocompatibility antigen, M beta 1 chain [Source:RGD Symbol;Acc:11469141]	yes|down	1
ENSRNOG00000024899	Cxcl13	C-X-C motif chemokine ligand 13 [Source:RGD Symbol;Acc:1564256]	yes|down	1
ENSRNOG00000010111	Exoc3l4	exocyst complex component 3-like 4 [Source:RGD Symbol;Acc:1307749]	yes|down	1
ENSRNOG00000058568	Dhrs9	dehydrogenase/reductase 9 [Source:RGD Symbol;Acc:620655]	yes|up	1
ENSRNOG00000016826	Pla2g2d	phospholipase A2, group IID [Source:RGD Symbol;Acc:1309862]	yes|down	1
ENSRNOG00000058566	LOC103694381	lymphotoxin-beta [Source:RGD Symbol;Acc:9083628]	yes|down	1
ENSRNOG00000016945	Pla2g2a	phospholipase A2 group IIA [Source:RGD Symbol;Acc:620857]	yes|down	1
ENSRNOG00000059460	Ttc30b	tetratricopeptide repeat domain 30B [Source:RGD Symbol;Acc:1590784]	yes|up	1
ENSRNOG00000032844	RT1-Da	RT1 class II, locus Da [Source:RGD Symbol;Acc:1593283]	yes|down	1
ENSRNOG00000032846	Cdpf1	cysteine rich, DPF motif domain containing 1 [Source:RGD Symbol;Acc:1306001]	yes|up	1
ENSRNOG00000014686	Kcnd3	potassium voltage-gated channel subfamily D member 3 [Source:RGD Symbol;Acc:68394]	yes|up	1
ENSRNOG00000017414	Irf7	interferon regulatory factor 7 [Source:RGD Symbol;Acc:1307828]	yes|up	1
ENSRNOG00000049315	AABR07065827.1		yes|down	1
ENSRNOG00000061608	Hoxa3	homeobox A3 [Source:RGD Symbol;Acc:1561431]	yes|up	1
ENSRNOG00000005751	Il36rn	interleukin 36 receptor antagonist [Source:RGD Symbol;Acc:1311212]	yes|up	1
ENSRNOG00000006867	Etv1	ets variant 1 [Source:RGD Symbol;Acc:1312007]	yes|up	1
ENSRNOG00000006860	Itk	IL2-inducible T-cell kinase [Source:RGD Symbol;Acc:1311618]	yes|down	1
ENSRNOG00000055995	AABR07021213.1		yes|down	1
ENSRNOG00000007927	Mettl7b	methyltransferase like 7B [Source:RGD Symbol;Acc:1305205]	yes|up	1
ENSRNOG00000010378	Slc4a5	solute carrier family 4 member 5 [Source:RGD Symbol;Acc:1303009]	yes|down	1
ENSRNOG00000054508	Foxp2	forkhead box P2 [Source:RGD Symbol;Acc:1559697]	yes|up	1
ENSRNOG00000011672	Tph1	tryptophan hydroxylase 1 [Source:RGD Symbol;Acc:3895]	yes|up	1
ENSRNOG00000004409	Sash3	SAM and SH3 domain containing 3 [Source:RGD Symbol;Acc:1560293]	yes|down	1
ENSRNOG00000011575	Adamts18	ADAM metallopeptidase with thrombospondin type 1 motif, 18 [Source:RGD Symbol;Acc:1560118]	yes|up	1
ENSRNOG00000032048	Zfp462	zinc finger protein 462 [Source:RGD Symbol;Acc:1562123]	yes|up	1
ENSRNOG00000004328	Deptor	DEP domain containing MTOR-interacting protein [Source:RGD Symbol;Acc:1561030]	yes|up	1
ENSRNOG00000052407	Btk	Bruton tyrosine kinase [Source:RGD Symbol;Acc:1359683]	yes|down	1
ENSRNOG00000011475	Srcin1	SRC kinase signaling inhibitor 1 [Source:RGD Symbol;Acc:708439]	yes|down	1
ENSRNOG00000059166	Ldb3	LIM domain binding 3 [Source:RGD Symbol;Acc:1564875]	yes|up	1
ENSRNOG00000002866	Rassf6	Ras association domain family member 6 [Source:RGD Symbol;Acc:1566082]	yes|up	1
ENSRNOG00000013829	Chrna3	cholinergic receptor nicotinic alpha 3 subunit [Source:RGD Symbol;Acc:2345]	yes|up	1
ENSRNOG00000058361	AABR07073391.1		yes|down	1
ENSRNOG00000062170	AABR07058158.1		yes|down	1
ENSRNOG00000018982	Entpd3	ectonucleoside triphosphate diphosphohydrolase 3 [Source:RGD Symbol;Acc:631326]	yes|up	1
ENSRNOG00000011278	Stk3	serine/threonine kinase 3 [Source:RGD Symbol;Acc:68412]	yes|up	1
ENSRNOG00000018327	Fank1	fibronectin type III and ankyrin repeat domains 1 [Source:RGD Symbol;Acc:1304756]	yes|up	1
ENSRNOG00000023262	Cenpm	centromere protein M [Source:RGD Symbol;Acc:1307309]	yes|down	1
ENSRNOG00000023261	Ube2q2l	ubiquitin-conjugating enzyme E2Q family member 2-like [Source:RGD Symbol;Acc:1563226]	yes|up	1
ENSRNOG00000027037	Alox12	arachidonate 12-lipoxygenase, 12S type [Source:RGD Symbol;Acc:1311159]	yes|down	1
ENSRNOG00000027035	Sgo2	shugoshin 2 [Source:RGD Symbol;Acc:1308450]	yes|down	1
ENSRNOG00000061070	Irf4	interferon regulatory factor 4 [Source:RGD Symbol;Acc:1308050]	yes|down	1
ENSRNOG00000057273	AABR07062157.1		yes|down	1
ENSRNOG00000023269	AABR07021759.1		yes|down	1
ENSRNOG00000017510	Mfge8	milk fat globule-EGF factor 8 protein [Source:RGD Symbol;Acc:3083]	yes|down	1
ENSRNOG00000053430	Slco4a1	solute carrier organic anion transporter family, member 4a1 [Source:RGD Symbol;Acc:620228]	yes|down	1
ENSRNOG00000011156	Clstn3	calsyntenin 3 [Source:RGD Symbol;Acc:621153]	yes|up	1
ENSRNOG00000016689	Fanci	FA complementation group I [Source:RGD Symbol;Acc:2321863]	yes|down	1
ENSRNOG00000011151	Tenm4	teneurin transmembrane protein 4 [Source:RGD Symbol;Acc:1304658]	yes|up	1
ENSRNOG00000060782	Nkx3-2	NK3 homeobox 2 [Source:RGD Symbol;Acc:1584617]	yes|up	1
ENSRNOG00000040242	Epm2a	EPM2A, laforin glucan phosphatase [Source:RGD Symbol;Acc:71047]	yes|up	1
ENSRNOG00000023576	RGD1305645	similar to RIKEN cDNA 1500015O10 [Source:RGD Symbol;Acc:1305645]	yes|up	1
ENSRNOG00000043124	Cckar	cholecystokinin A receptor [Source:RGD Symbol;Acc:2289]	yes|up	1
ENSRNOG00000026039	Tspan32	tetraspanin 32 [Source:RGD Symbol;Acc:1308721]	yes|down	1
ENSRNOG00000016728	Tiam2	T-cell lymphoma invasion and metastasis 2 [Source:RGD Symbol;Acc:2324148]	yes|up	1
ENSRNOG00000016357	Casc4	cancer susceptibility 4 [Source:RGD Symbol;Acc:1305985]	yes|up	1
ENSRNOG00000019195	Polh	DNA polymerase eta [Source:RGD Symbol;Acc:1309893]	yes|down	1
ENSRNOG00000018113	AABR07028352.1	anillin, actin binding protein-like 1 [Source:NCBI gene;Acc:307056]	yes|down	1
ENSRNOG00000019050	Ifit1	interferon-induced protein with tetratricopeptide repeats 1 [Source:RGD Symbol;Acc:620599]	yes|up	1
ENSRNOG00000026745	Acsl6	acyl-CoA synthetase long-chain family member 6 [Source:RGD Symbol;Acc:69403]	yes|up	1
ENSRNOG00000008180	Lyn	LYN proto-oncogene, Src family tyrosine kinase [Source:RGD Symbol;Acc:621017]	yes|down	1
ENSRNOG00000019057	Prkcq	protein kinase C, theta [Source:RGD Symbol;Acc:620968]	yes|down	1
ENSRNOG00000023465	Depp1	DEPP1, autophagy regulator [Source:RGD Symbol;Acc:1565700]	yes|up	1
ENSRNOG00000062228	LOC100359515	rCG35337-like [Source:RGD Symbol;Acc:2323679]	yes|down	1
ENSRNOG00000052873	Npnt	nephronectin [Source:NCBI gene;Acc:686753]	yes|up	1
ENSRNOG00000019430	Coro1a	coronin 1A [Source:RGD Symbol;Acc:620009]	yes|down	1
ENSRNOG00000061414	Acot12	acyl-CoA thioesterase 12 [Source:RGD Symbol;Acc:619752]	yes|up	1
ENSRNOG00000016753	Slc14a1	solute carrier family 14 member 1 [Source:RGD Symbol;Acc:3688]	yes|down	1
ENSRNOG00000026108	Tcof1	treacle ribosome biogenesis factor 1 [Source:RGD Symbol;Acc:1309850]	yes|down	1
ENSRNOG00000019907	Nfkbie	NFKB inhibitor epsilon [Source:RGD Symbol;Acc:735070]	yes|down	1
ENSRNOG00000008115	Arhgap11a	Rho GTPase activating protein 11A [Source:RGD Symbol;Acc:1309107]	yes|down	1
ENSRNOG00000047647	Il2ra	interleukin 2 receptor subunit alpha [Source:RGD Symbol;Acc:2895]	yes|down	1
ENSRNOG00000033893	Cacna1h	calcium voltage-gated channel subunit alpha1 H [Source:RGD Symbol;Acc:68943]	yes|up	1
ENSRNOG00000004247	Nhp2	NHP2 ribonucleoprotein [Source:RGD Symbol;Acc:1309435]	yes|down	1
ENSRNOG00000004242	Pole2	DNA polymerase epsilon 2, accessory subunit [Source:RGD Symbol;Acc:1311962]	yes|down	1
ENSRNOG00000026791	Pgbd5	piggyBac transposable element derived 5 [Source:RGD Symbol;Acc:1310825]	yes|up	1
ENSRNOG00000046854	AABR07061022.1		yes|down	1
ENSRNOG00000011702	Foxp3	forkhead box P3 [Source:RGD Symbol;Acc:1562112]	yes|down	1
ENSRNOG00000048295	AABR07039229.2	DMRT-like family C1a [Source:NCBI gene;Acc:501668]	yes|up	1
ENSRNOG00000016437	Tm4sf4	transmembrane 4 L six family member 4 [Source:RGD Symbol;Acc:621784]	yes|up	1
ENSRNOG00000016434	Prkd2	protein kinase D2 [Source:RGD Symbol;Acc:1308054]	yes|down	1
ENSRNOG00000046858	MGC109340	similar to Microsomal signal peptidase 23 kDa subunit (SPase 22 kDa subunit) (SPC22/23) [Source:RGD Symbol;Acc:1563536]	yes|up	1
ENSRNOG00000012051	Ncaph	non-SMC condensin I complex, subunit H [Source:RGD Symbol;Acc:1596799]	yes|down	1
ENSRNOG00000019374	Csk	C-terminal Src kinase [Source:RGD Symbol;Acc:1308800]	yes|down	1
ENSRNOG00000016535	Ccl22	C-C motif chemokine ligand 22 [Source:RGD Symbol;Acc:619933]	yes|down	1
ENSRNOG00000022480	Atp6v1g3	ATPase H+ transporting V1 subunit G3 [Source:RGD Symbol;Acc:1304635]	yes|down	1
ENSRNOG00000012110	Col17a1	collagen type XVII alpha 1 chain [Source:RGD Symbol;Acc:1311130]	yes|down	1
ENSRNOG00000058796	AABR07035005.1		yes|up	1
ENSRNOG00000023633	Crabp1	cellular retinoic acid binding protein 1 [Source:RGD Symbol;Acc:2400]	yes|up	1
ENSRNOG00000017804	Sept1	septin 1 [Source:RGD Symbol;Acc:1307216]	yes|down	1
ENSRNOG00000017805	Duoxa2	dual oxidase maturation factor 2 [Source:RGD Symbol;Acc:1560628]	yes|down	1
ENSRNOG00000060237	Inhbb	inhibin subunit beta B [Source:RGD Symbol;Acc:2913]	yes|down	1
ENSRNOG00000012835	Espl1	extra spindle pole bodies like 1, separase [Source:RGD Symbol;Acc:1306266]	yes|down	1
ENSRNOG00000012119	AABR07069282.1		yes|down	1
ENSRNOG00000022337	Slitrk6	SLIT and NTRK-like family, member 6 [Source:RGD Symbol;Acc:1306550]	yes|up	1
ENSRNOG00000017803	Apbb1ip	amyloid beta precursor protein binding family B member 1 interacting protein [Source:RGD Symbol;Acc:1304795]	yes|down	1
ENSRNOG00000017939	Chn1	chimerin 1 [Source:RGD Symbol;Acc:620139]	yes|up	1
ENSRNOG00000008450	LOC100359539	ribonucleotide reductase M2 polypeptide [Source:RGD Symbol;Acc:2323655]	yes|down	1
ENSRNOG00000037673	AABR07071891.2		yes|down	1
ENSRNOG00000014317	Arpc5l	actin related protein 2/3 complex, subunit 5-like [Source:RGD Symbol;Acc:1308867]	yes|down	1
ENSRNOG00000007030	Epha7	Eph receptor A7 [Source:RGD Symbol;Acc:70957]	yes|up	1
ENSRNOG00000048190	Rgmb	repulsive guidance molecule BMP co-receptor b [Source:RGD Symbol;Acc:1595392]	yes|up	1
ENSRNOG00000008755	Acox1	acyl-CoA oxidase 1 [Source:RGD Symbol;Acc:619757]	yes|up	1
ENSRNOG00000055672	Gpx2	glutathione peroxidase 2 [Source:RGD Symbol;Acc:727780]	yes|down	1
ENSRNOG00000059927	AABR07044414.1		yes|down	1
ENSRNOG00000016316	Mcm2	minichromosome maintenance complex component 2 [Source:RGD Symbol;Acc:1305577]	yes|down	1
ENSRNOG00000017808	Klf15	Kruppel-like factor 15 [Source:RGD Symbol;Acc:70918]	yes|up	1
ENSRNOG00000023993	Kif1a	kinesin family member 1A [Source:RGD Symbol;Acc:1304996]	yes|up	1
ENSRNOG00000038286	Slamf6	SLAM family member 6 [Source:RGD Symbol;Acc:1561848]	yes|down	1
ENSRNOG00000058870	Mroh7	maestro heat-like repeat family member 7 [Source:RGD Symbol;Acc:1563440]	yes|up	1
ENSRNOG00000010515	Trim59	tripartite motif-containing 59 [Source:RGD Symbol;Acc:1311956]	yes|down	1
ENSRNOG00000026252	E2f7	E2F transcription factor 7 [Source:RGD Symbol;Acc:1310258]	yes|down	1
ENSRNOG00000005451	Dnah11	dynein, axonemal, heavy chain 11 [Source:RGD Symbol;Acc:621088]	yes|up	1
ENSRNOG00000016547	Rgs19	regulator of G-protein signaling 19 [Source:RGD Symbol;Acc:629471]	yes|down	1
ENSRNOG00000003198	RGD1305733	similar to RIKEN cDNA 2900011O08 [Source:RGD Symbol;Acc:1305733]	yes|up	1
ENSRNOG00000017893	Baiap3	BAI1-associated protein 3 [Source:RGD Symbol;Acc:10059729]	yes|down	1
ENSRNOG00000003195	Caskin1	CASK interacting protein 1 [Source:RGD Symbol;Acc:620191]	yes|up	1
ENSRNOG00000019572	Lsm4	LSM4 homolog, U6 small nuclear RNA and mRNA degradation associated [Source:RGD Symbol;Acc:1306808]	yes|down	1
ENSRNOG00000008706	Tbx3	T-box 3 [Source:RGD Symbol;Acc:735203]	yes|up	1
ENSRNOG00000025354	Rinl	Ras and Rab interactor-like [Source:RGD Symbol;Acc:1310133]	yes|down	1
ENSRNOG00000007744	Ehd3	EH-domain containing 3 [Source:RGD Symbol;Acc:621762]	yes|down	1
ENSRNOG00000013884	Psd3	pleckstrin and Sec7 domain containing 3 [Source:RGD Symbol;Acc:1559968]	yes|up	1
ENSRNOG00000047211	Fzd3	frizzled class receptor 3 [Source:RGD Symbol;Acc:628814]	yes|up	1
ENSRNOG00000013886	Fyb1	FYN binding protein 1 [Source:RGD Symbol;Acc:1563421]	yes|down	1
ENSRNOG00000008625	Rimkla	ribosomal modification protein rimK-like family member A [Source:NCBI gene;Acc:313553]	yes|up	1
ENSRNOG00000006617	AABR07060487.1		yes|up	1
ENSRNOG00000008984	Irak1bp1	interleukin-1 receptor-associated kinase 1 binding protein 1 [Source:RGD Symbol;Acc:1305012]	yes|up	1
ENSRNOG00000047450	Lmo3	LIM domain only 3 [Source:RGD Symbol;Acc:1561357]	yes|up	1
ENSRNOG00000015131	Ube2c	ubiquitin-conjugating enzyme E2C [Source:RGD Symbol;Acc:1305382]	yes|down	1
ENSRNOG00000001837	Sst	somatostatin [Source:RGD Symbol;Acc:3761]	yes|up	1
ENSRNOG00000012283	Chrna6	cholinergic receptor nicotinic alpha 6 subunit [Source:RGD Symbol;Acc:69281]	yes|up	1
ENSRNOG00000010695	Pdgfc	platelet derived growth factor C [Source:RGD Symbol;Acc:68410]	yes|up	1
ENSRNOG00000001931	Fgf12	fibroblast growth factor 12 [Source:RGD Symbol;Acc:620163]	yes|up	1
ENSRNOG00000021856	Lat2	linker for activation of T cells family, member 2 [Source:RGD Symbol;Acc:631397]	yes|down	1
ENSRNOG00000055402	AABR07017634.1		yes|down	1
ENSRNOG00000021916	Slc16a12	solute carrier family 16, member 12 [Source:RGD Symbol;Acc:1311468]	yes|up	1
ENSRNOG00000005787	Erp27	endoplasmic reticulum protein 27 [Source:RGD Symbol;Acc:1565381]	yes|down	1
ENSRNOG00000003283	Rcsd1	RCSD domain containing 1 [Source:RGD Symbol;Acc:1304715]	yes|down	1
ENSRNOG00000002471	Polq	DNA polymerase theta [Source:RGD Symbol;Acc:1309795]	yes|down	1
ENSRNOG00000002470	Ifi47	interferon gamma inducible protein 47 [Source:RGD Symbol;Acc:708470]	yes|down	1
ENSRNOG00000003285	Mpv17l	MPV17 mitochondrial inner membrane protein like [Source:RGD Symbol;Acc:2324483]	yes|up	1
ENSRNOG00000022807	Pced1b	PC-esterase domain containing 1B [Source:RGD Symbol;Acc:1561028]	yes|down	1
ENSRNOG00000002372	Sgcd	sarcoglycan, delta [Source:RGD Symbol;Acc:1306638]	yes|up	1
ENSRNOG00000011076	Ank2	ankyrin 2 [Source:RGD Symbol;Acc:620156]	yes|up	1
ENSRNOG00000024277	AABR07035470.1	caspase recruitment domain family, member 11 [Source:NCBI gene;Acc:100363332]	yes|down	1
ENSRNOG00000013121	Mier3	MIER family member 3 [Source:RGD Symbol;Acc:1311241]	yes|up	1
ENSRNOG00000014312	AC109737.1		yes|down	1
ENSRNOG00000028082	Tal2	TAL bHLH transcription factor 2 [Source:RGD Symbol;Acc:1596467]	yes|up	1
ENSRNOG00000028083	Tmem35b	transmembrane protein 35B [Source:RGD Symbol;Acc:2319741]	yes|down	1
ENSRNOG00000024077	Fbxo5	F-box protein 5 [Source:RGD Symbol;Acc:1309405]	yes|down	1
ENSRNOG00000020106	Tnfrsf4	TNF receptor superfamily member 4 [Source:RGD Symbol;Acc:3920]	yes|down	1
ENSRNOG00000013128	Tmem179	transmembrane protein 179 [Source:RGD Symbol;Acc:1310269]	yes|up	1
ENSRNOG00000002303	Kcnj12	potassium voltage-gated channel subfamily J member 12 [Source:RGD Symbol;Acc:621660]	yes|up	1
ENSRNOG00000024178	Cenpt	centromere protein T [Source:RGD Symbol;Acc:1309383]	yes|down	1
ENSRNOG00000006263	Sh2d1a	SH2 domain containing 1A [Source:RGD Symbol;Acc:1562408]	yes|down	1
ENSRNOG00000000655	Ptprc	protein tyrosine phosphatase, receptor type, C [Source:RGD Symbol;Acc:3451]	yes|down	1
ENSRNOG00000043164	AABR07060353.2		yes|down	1
ENSRNOG00000000653	Nr5a2	nuclear receptor subfamily 5, group A, member 2 [Source:RGD Symbol;Acc:68353]	yes|up	1
ENSRNOG00000056273	AABR07051692.1		yes|down	1
ENSRNOG00000038319	Akr1c19	aldo-keto reductase family 1, member C19 [Source:RGD Symbol;Acc:1562954]	yes|up	1
ENSRNOG00000033531	Cacna2d1	calcium voltage-gated channel auxiliary subunit alpha2delta 1 [Source:RGD Symbol;Acc:2247]	yes|up	1
ENSRNOG00000007690	Cmpk2	cytidine/uridine monophosphate kinase 2 [Source:RGD Symbol;Acc:1305881]	yes|up	1
ENSRNOG00000012735	Kif24	kinesin family member 24 [Source:RGD Symbol;Acc:1307723]	yes|down	1
ENSRNOG00000042747	Fam72a	family with sequence similarity 72, member A [Source:RGD Symbol;Acc:1598023]	yes|down	1
ENSRNOG00000052128	Clec2e	C-type lectin domain family 2, member E [Source:RGD Symbol;Acc:1587527]	yes|up	1
ENSRNOG00000046168	Ppm1l	protein phosphatase, Mg2+/Mn2+ dependent, 1L [Source:RGD Symbol;Acc:1305220]	yes|up	1
ENSRNOG00000013014	Cyba	cytochrome b-245 alpha chain [Source:RGD Symbol;Acc:620573]	yes|down	1
ENSRNOG00000001349	Mcm7	minichromosome maintenance complex component 7 [Source:RGD Symbol;Acc:1303018]	yes|down	1
ENSRNOG00000006167	Rasal3	RAS protein activator like 3 [Source:RGD Symbol;Acc:1309019]	yes|down	1
ENSRNOG00000006735	Cdkn2b	cyclin-dependent kinase inhibitor 2B [Source:RGD Symbol;Acc:2324]	yes|up	1
ENSRNOG00000024000	Cd22	CD22 molecule [Source:RGD Symbol;Acc:1311610]	yes|down	1
ENSRNOG00000022505	Slc17a4	solute carrier family 17, member 4 [Source:RGD Symbol;Acc:1584758]	yes|up	1
ENSRNOG00000001692	Chaf1b	chromatin assembly factor 1 subunit B [Source:RGD Symbol;Acc:1307634]	yes|down	1
ENSRNOG00000013391	Sorbs2	sorbin and SH3 domain containing 2 [Source:RGD Symbol;Acc:620061]	yes|up	1
ENSRNOG00000056874	AABR07026565.1		yes|down	1
ENSRNOG00000042607	Rhof	ras homolog family member F, filopodia associated [Source:RGD Symbol;Acc:1584038]	yes|down	1
ENSRNOG00000001061	Rilpl2	Rab interacting lysosomal protein-like 2 [Source:RGD Symbol;Acc:1303140]	yes|down	1
ENSRNOG00000002079	Mapk10	mitogen activated protein kinase 10 [Source:RGD Symbol;Acc:3663]	yes|up	1
ENSRNOG00000021685	Cdk5r1	cyclin-dependent kinase 5 regulatory subunit 1 [Source:RGD Symbol;Acc:629472]	yes|down	1
ENSRNOG00000020770	Arl4d	ADP-ribosylation factor like GTPase 4D [Source:RGD Symbol;Acc:1306875]	yes|up	1
ENSRNOG00000053753	AABR07070307.1		yes|up	1
ENSRNOG00000053026	Shcbp1	SHC binding and spindle associated 1 [Source:RGD Symbol;Acc:1590844]	yes|down	1
ENSRNOG00000056059	AABR07060352.2		yes|down	1
ENSRNOG00000053025	AC130391.3		yes|up	1
ENSRNOG00000046076	Tspan10	tetraspanin 10 [Source:RGD Symbol;Acc:1590062]	yes|down	1
ENSRNOG00000004483	Ptprr	protein tyrosine phosphatase, receptor type, R [Source:RGD Symbol;Acc:620780]	yes|up	1
ENSRNOG00000056574	Tigit	T cell immunoreceptor with Ig and ITIM domains [Source:RGD Symbol;Acc:1563191]	yes|down	1
ENSRNOG00000053118	LOC103694867	ADP-ribosylation factor-binding protein GGA2-like [Source:RGD Symbol;Acc:9280434]	yes|down	1
ENSRNOG00000011892	Slc36a2	solute carrier family 36 member 2 [Source:RGD Symbol;Acc:620492]	yes|down	1
ENSRNOG00000001425	Sh2b2	SH2B adaptor protein 2 [Source:RGD Symbol;Acc:69284]	yes|down	1
ENSRNOG00000020884	Cd6	Cd6 molecule [Source:RGD Symbol;Acc:2312]	yes|down	1
ENSRNOG00000020882	Shkbp1	Sh3kbp1 binding protein 1 [Source:RGD Symbol;Acc:1309281]	yes|down	1
ENSRNOG00000025069	Ly9	lymphocyte antigen 9 [Source:RGD Symbol;Acc:1308341]	yes|down	1
ENSRNOG00000057458	Oip5	Opa interacting protein 5 [Source:RGD Symbol;Acc:1564263]	yes|down	1
ENSRNOG00000051880	AABR07021996.1		yes|down	1
ENSRNOG00000012543	Mcm3	minichromosome maintenance complex component 3 [Source:RGD Symbol;Acc:1305168]	yes|down	1
ENSRNOG00000011497	Aldh1b1	aldehyde dehydrogenase 1 family, member B1 [Source:RGD Symbol;Acc:1306737]	yes|up	1
ENSRNOG00000013267	Helz2	helicase with zinc finger 2 [Source:RGD Symbol;Acc:1306056]	yes|down	1
ENSRNOG00000015810	Trip13	thyroid hormone receptor interactor 13 [Source:RGD Symbol;Acc:1308516]	yes|down	1
ENSRNOG00000053334	Stmn4	stathmin 4 [Source:RGD Symbol;Acc:69349]	yes|up	1
ENSRNOG00000001115	Slc29a4	solute carrier family 29 member 4 [Source:RGD Symbol;Acc:1310545]	yes|up	1
ENSRNOG00000000838	Lta	lymphotoxin alpha [Source:RGD Symbol;Acc:3020]	yes|down	1
ENSRNOG00000001525	Igsf11	immunoglobulin superfamily, member 11 [Source:RGD Symbol;Acc:1308758]	yes|up	1
ENSRNOG00000005669	Car8	carbonic anhydrase 8 [Source:RGD Symbol;Acc:1304709]	yes|up	1
ENSRNOG00000001527	Cd80	Cd80 molecule [Source:RGD Symbol;Acc:2314]	yes|down	1
ENSRNOG00000030920	Rtn4r	reticulon 4 receptor [Source:RGD Symbol;Acc:620810]	yes|up	1
ENSRNOG00000009565	Pdk4	pyruvate dehydrogenase kinase 4 [Source:RGD Symbol;Acc:69061]	yes|up	1
ENSRNOG00000030431	RT1-Db2	RT1 class II, locus Db2 [Source:RGD Symbol;Acc:1595922]	yes|down	1
ENSRNOG00000057221	Scn3b	sodium voltage-gated channel beta subunit 3 [Source:RGD Symbol;Acc:621657]	yes|up	1
ENSRNOG00000053239	Clmp	CXADR-like membrane protein [Source:RGD Symbol;Acc:708569]	yes|up	1
ENSRNOG00000005109	Rprm	reprimo, TP53 dependent G2 arrest mediator homolog [Source:RGD Symbol;Acc:1595512]	yes|up	1
ENSRNOG00000002397	Slc30a10	solute carrier family 30, member 10 [Source:RGD Symbol;Acc:1305098]	yes|up	1
ENSRNOG00000050430	Vav1	vav guanine nucleotide exchange factor 1 [Source:RGD Symbol;Acc:3951]	yes|down	1
ENSRNOG00000050431	Aspnl1	asporin-like 1 [Source:RGD Symbol;Acc:9278606]	yes|up	1
ENSRNOG00000014615	Grk6	G protein-coupled receptor kinase 6 [Source:RGD Symbol;Acc:61986]	yes|down	1
ENSRNOG00000062252	AABR07072853.4		yes|up	1
ENSRNOG00000013309	Pik3ap1	phosphoinositide-3-kinase adaptor protein 1 [Source:RGD Symbol;Acc:1307744]	yes|down	1
ENSRNOG00000013064	Lrp8	LDL receptor related protein 8 [Source:RGD Symbol;Acc:1305729]	yes|down	1
ENSRNOG00000028708	Ntsr1	neurotensin receptor 1 [Source:RGD Symbol;Acc:1306076]	yes|up	1
ENSRNOG00000013069	Sapcd2	suppressor APC domain containing 2 [Source:RGD Symbol;Acc:1590629]	yes|down	1
ENSRNOG00000028581	Ccdc138	coiled-coil domain containing 138 [Source:RGD Symbol;Acc:1566050]	yes|up	1
ENSRNOG00000029564	Trat1	T cell receptor associated transmembrane adaptor 1 [Source:RGD Symbol;Acc:1563011]	yes|down	1
ENSRNOG00000014464	Tnfsf13b	TNF superfamily member 13b [Source:RGD Symbol;Acc:1561519]	yes|down	1
ENSRNOG00000050220	Nrxn1	neurexin 1 [Source:RGD Symbol;Acc:628659]	yes|up	1
ENSRNOG00000017550	Fbln7	fibulin 7 [Source:RGD Symbol;Acc:1310131]	yes|up	1
ENSRNOG00000059878	Rad51ap1	RAD51 associated protein 1 [Source:RGD Symbol;Acc:1597431]	yes|down	1
ENSRNOG00000017496	Cnp	2',3'-cyclic nucleotide 3' phosphodiesterase [Source:RGD Symbol;Acc:2368]	yes|down	1
ENSRNOG00000053521	RF00108		yes|up	1
ENSRNOG00000005206	Kcnq3	potassium voltage-gated channel subfamily Q member 3 [Source:RGD Symbol;Acc:69222]	yes|up	1
ENSRNOG00000059870	Hoxa11	homeobox A11 [Source:RGD Symbol;Acc:1564605]	yes|up	1
ENSRNOG00000030151	Thsd7a	thrombospondin type 1 domain containing 7A [Source:RGD Symbol;Acc:1566201]	yes|up	1
ENSRNOG00000048769	Nek5	NIMA-related kinase 5 [Source:RGD Symbol;Acc:1593817]	yes|up	1
ENSRNOG00000016541	Enc1	ectodermal-neural cortex 1 [Source:RGD Symbol;Acc:1303152]	yes|up	1
ENSRNOG00000050343	Jmy	junction mediating and regulatory protein, p53 cofactor [Source:NCBI gene;Acc:683593]	yes|up	1
ENSRNOG00000010519	Cyp39a1	cytochrome P450, family 39, subfamily a, polypeptide 1 [Source:RGD Symbol;Acc:1307471]	yes|up	1
ENSRNOG00000009663	Apex1	apurinic/apyrimidinic endodeoxyribonuclease 1 [Source:RGD Symbol;Acc:2126]	yes|down	1
ENSRNOG00000051743	AABR07043822.1		yes|up	1
ENSRNOG00000002024	Epha5	EPH receptor A5 [Source:RGD Symbol;Acc:620831]	yes|up	1
ENSRNOG00000058692	Slc26a4	solute carrier family 26 member 4 [Source:RGD Symbol;Acc:3293]	yes|up	1
ENSRNOG00000042309	Kiaa0408L	Kiaa0408-like [Source:RGD Symbol;Acc:1307525]	yes|up	1
ENSRNOG00000052725	Shisal1	shisa like 1 [Source:RGD Symbol;Acc:1566029]	yes|up	1
ENSRNOG00000054902	Trpc1	transient receptor potential cation channel, subfamily C, member 1 [Source:RGD Symbol;Acc:619783]	yes|up	1
ENSRNOG00000005299	Kif5a	kinesin family member 5A [Source:RGD Symbol;Acc:1303035]	yes|up	1
ENSRNOG00000017259	Tacc3	transforming, acidic coiled-coil containing protein 3 [Source:RGD Symbol;Acc:1302948]	yes|down	1
ENSRNOG00000005126	Pqlc3	PQ loop repeat containing 3 [Source:RGD Symbol;Acc:1306818]	yes|down	1
ENSRNOG00000014721	Ahrr	aryl-hydrocarbon receptor repressor [Source:RGD Symbol;Acc:1559857]	yes|up	1
ENSRNOG00000017250	Gmpr	guanosine monophosphate reductase [Source:RGD Symbol;Acc:70980]	yes|up	1
ENSRNOG00000016221	Scn2b	sodium voltage-gated channel beta subunit 2 [Source:RGD Symbol;Acc:3633]	yes|up	1
ENSRNOG00000027341	Tenm2	teneurin transmembrane protein 2 [Source:RGD Symbol;Acc:727907]	yes|up	1
ENSRNOG00000009345	Ugt8	UDP glycosyltransferase 8 [Source:RGD Symbol;Acc:3938]	yes|up	1
ENSRNOG00000009346	Zbtb26	zinc finger and BTB domain containing 26 [Source:RGD Symbol;Acc:1308561]	yes|up	1
ENSRNOG00000009347	Arhgap25	Rho GTPase activating protein 25 [Source:RGD Symbol;Acc:1562105]	yes|down	1
ENSRNOG00000009342	Fcnb	ficolin B [Source:RGD Symbol;Acc:621222]	yes|down	1
ENSRNOG00000003954	Il2rg	interleukin 2 receptor subunit gamma [Source:RGD Symbol;Acc:621466]	yes|down	1
ENSRNOG00000034230	Fcrl1	Fc receptor-like 1 [Source:RGD Symbol;Acc:1589411]	yes|down	1
ENSRNOG00000003998	Sgca	sarcoglycan, alpha [Source:RGD Symbol;Acc:1308062]	yes|up	1
ENSRNOG00000046946	Ptchd3	patched domain containing 3 [Source:RGD Symbol;Acc:1590039]	yes|up	1
ENSRNOG00000028895	Rtp4	receptor (chemosensory) transporter protein 4 [Source:RGD Symbol;Acc:1306974]	yes|up	1
ENSRNOG00000055111	AABR07000658.1	cyclin B2-like [Source:NCBI gene;Acc:100364016]	yes|down	1
ENSRNOG00000028896	LOC100911545	alpha-2-macroglobulin-like [Source:RGD Symbol;Acc:6492449]	yes|down	1
ENSRNOG00000028394	Vpreb3	V-set pre-B cell surrogate light chain 3 [Source:RGD Symbol;Acc:1306807]	yes|down	1
ENSRNOG00000018760	Mpp7	membrane palmitoylated protein 7 [Source:RGD Symbol;Acc:1305675]	yes|up	1
ENSRNOG00000054587	AABR07060920.1		yes|down	1
ENSRNOG00000016810	Stmn1	stathmin 1 [Source:RGD Symbol;Acc:2992]	yes|down	1
ENSRNOG00000054391	Snurf	SNRPN upstream reading frame [Source:RGD Symbol;Acc:69269]	yes|up	1
ENSRNOG00000016957	Igfbp2	insulin-like growth factor binding protein 2 [Source:RGD Symbol;Acc:2873]	yes|up	1
ENSRNOG00000010284	St3gal5	ST3 beta-galactoside alpha-2,3-sialyltransferase 5 [Source:RGD Symbol;Acc:620875]	yes|down	1
ENSRNOG00000010283	Cd28	Cd28 molecule [Source:RGD Symbol;Acc:2299]	yes|down	1
ENSRNOG00000060123	Kifc2	kinesin family member C2 [Source:RGD Symbol;Acc:735021]	yes|up	1
ENSRNOG00000016953	Chst4	carbohydrate sulfotransferase 4 [Source:RGD Symbol;Acc:1310798]	yes|up	1
ENSRNOG00000006979	Hpca	hippocalcin [Source:RGD Symbol;Acc:620060]	yes|up	1
ENSRNOG00000020420	Pklr	pyruvate kinase L/R [Source:RGD Symbol;Acc:3336]	yes|up	1
ENSRNOG00000033402	Gsta6	glutathione S-transferase alpha 6 [Source:RGD Symbol;Acc:1565402]	yes|down	1
ENSRNOG00000005687	Slc6a14	solute carrier family 6 member 14 [Source:RGD Symbol;Acc:1561810]	yes|down	1
ENSRNOG00000028801	Gsap	gamma-secretase activating protein [Source:RGD Symbol;Acc:1563271]	yes|down	1
ENSRNOG00000005726	Pclo	piccolo (presynaptic cytomatrix protein) [Source:RGD Symbol;Acc:69406]	yes|up	1
ENSRNOG00000059479	Adcy1	adenylate cyclase 1 [Source:RGD Symbol;Acc:1309318]	yes|up	1
ENSRNOG00000048982	LOC100912282	calcium-binding and coiled-coil domain-containing protein 1-like [Source:RGD Symbol;Acc:6488185]	yes|up	1
ENSRNOG00000028415	Cdc20	cell division cycle 20 [Source:RGD Symbol;Acc:620477]	yes|down	1
ENSRNOG00000061941	AABR07014290.1		yes|down	1
ENSRNOG00000005720	Spic	Spi-C transcription factor [Source:RGD Symbol;Acc:1306272]	yes|down	1
ENSRNOG00000010260	Dixdc1	DIX domain containing 1 [Source:RGD Symbol;Acc:1309902]	yes|up	1
ENSRNOG00000009113	Marcksl1	MARCKS-like 1 [Source:RGD Symbol;Acc:621197]	yes|down	1
ENSRNOG00000047931	Tmsb4x	thymosin beta 4, X-linked [Source:RGD Symbol;Acc:621622]	yes|down	1
ENSRNOG00000054511	AABR07035309.1		yes|up	1
ENSRNOG00000010266	Cd180	CD180 molecule [Source:RGD Symbol;Acc:1308170]	yes|down	1
ENSRNOG00000054049	Prelid2	PRELI domain containing 2 [Source:RGD Symbol;Acc:1584707]	yes|up	1
ENSRNOG00000004412	Mtbp	MDM2 binding protein [Source:RGD Symbol;Acc:1565672]	yes|down	1
ENSRNOG00000019985	Asic4	acid sensing ion channel subunit family member 4 [Source:RGD Symbol;Acc:621068]	yes|up	1
ENSRNOG00000013887	Adra2b	adrenoceptor alpha 2B [Source:RGD Symbol;Acc:2057]	yes|up	1
ENSRNOG00000036711	Spn	sialophorin [Source:RGD Symbol;Acc:3750]	yes|down	1
ENSRNOG00000015418	Klhl14	kelch-like family member 14 [Source:RGD Symbol;Acc:1566178]	yes|down	1
ENSRNOG00000037782	Gkn3	gastrokine 3 [Source:RGD Symbol;Acc:1597754]	yes|up	1
ENSRNOG00000011562	Slitrk2	SLIT and NTRK-like family, member 2 [Source:RGD Symbol;Acc:1561361]	yes|up	1
ENSRNOG00000018346	Agtr1a	angiotensin II receptor, type 1a [Source:RGD Symbol;Acc:2070]	yes|up	1
ENSRNOG00000059890	Clec2d2	C-type lectin domain family 2 member D2 [Source:RGD Symbol;Acc:1562831]	yes|down	1
ENSRNOG00000042229	AC099444.2	GTPase, IMAP family member 1 [Source:NCBI gene;Acc:312312]	yes|down	1
ENSRNOG00000049407	Shisa8	shisa family member 8 [Source:RGD Symbol;Acc:1563996]	yes|down	1
ENSRNOG00000059894	Hmmr	hyaluronan-mediated motility receptor [Source:RGD Symbol;Acc:2805]	yes|down	1
ENSRNOG00000014786	Ccne1	cyclin E1 [Source:RGD Symbol;Acc:2294]	yes|down	1
ENSRNOG00000018997	Myh7b	myosin heavy chain 7B [Source:RGD Symbol;Acc:1307994]	yes|up	1
ENSRNOG00000018238	Nuggc	nuclear GTPase, germinal center associated [Source:RGD Symbol;Acc:1562099]	yes|down	1
ENSRNOG00000048562	AC109542.1		yes|up	1
ENSRNOG00000017671	Rasa3	RAS p21 protein activator 3 [Source:RGD Symbol;Acc:69365]	yes|down	1
ENSRNOG00000027026	Jazf1	JAZF zinc finger 1 [Source:RGD Symbol;Acc:1589007]	yes|up	1
ENSRNOG00000005438	Pcsk2	proprotein convertase subtilisin/kexin type 2 [Source:RGD Symbol;Acc:3273]	yes|up	1
ENSRNOG00000000010	Cbln1	cerebellin 1 precursor [Source:RGD Symbol;Acc:1562813]	yes|down	1
ENSRNOG00000010986	Cmtm7	CKLF-like MARVEL transmembrane domain containing 7 [Source:RGD Symbol;Acc:1591926]	yes|down	1
ENSRNOG00000023858	Prss39	protease, serine, 39 [Source:RGD Symbol;Acc:1309276]	yes|down	1
ENSRNOG00000058609	Palmd	palmdelphin [Source:MGI Symbol;Acc:MGI:2148896]	yes|up	1
ENSRNOG00000019582	Mthfd1l	methylenetetrahydrofolate dehydrogenase (NADP+ dependent) 1-like [Source:RGD Symbol;Acc:1307311]	yes|down	1
ENSRNOG00000002800	Gdpd2	glycerophosphodiester phosphodiesterase domain containing 2 [Source:RGD Symbol;Acc:1560780]	yes|up	1
ENSRNOG00000055367	Rnase6	ribonuclease A family member k6 [Source:RGD Symbol;Acc:1303020]	yes|down	1
ENSRNOG00000047102	Popdc3	popeye domain containing 3 [Source:RGD Symbol;Acc:1590760]	yes|up	1
ENSRNOG00000043137	Lbhd2	LBH domain containing 2 [Source:RGD Symbol;Acc:1560608]	yes|down	1
ENSRNOG00000026435	Arid3a	AT-rich interaction domain 3A [Source:RGD Symbol;Acc:1305299]	yes|down	1
ENSRNOG00000008040	Pimreg	PICALM interacting mitotic regulator [Source:RGD Symbol;Acc:1308747]	yes|down	1
ENSRNOG00000011022	Mep1a	meprin A subunit alpha [Source:RGD Symbol;Acc:3080]	yes|up	1
ENSRNOG00000016322	Camk2n1	calcium/calmodulin-dependent protein kinase II inhibitor 1 [Source:RGD Symbol;Acc:708430]	yes|up	1
ENSRNOG00000052264	AABR07034393.1		yes|up	1
ENSRNOG00000018162	Nhej1	nonhomologous end-joining factor 1 [Source:RGD Symbol;Acc:1359338]	yes|down	1
ENSRNOG00000018163	Ipcef1	interaction protein for cytohesin exchange factors 1 [Source:RGD Symbol;Acc:735159]	yes|down	1
ENSRNOG00000016041	Zc3h12d	zinc finger CCCH type containing 12D [Source:RGD Symbol;Acc:1597152]	yes|down	1
ENSRNOG00000045999	Tnfaip8l1	TNF alpha induced protein 8 like 1 [Source:RGD Symbol;Acc:1588574]	yes|down	1
ENSRNOG00000046011	AABR07065645.1		yes|down	1
ENSRNOG00000014090	Retsat	retinol saturase [Source:RGD Symbol;Acc:628802]	yes|up	1
ENSRNOG00000017601	Srd5a1	steroid 5 alpha-reductase 1 [Source:RGD Symbol;Acc:3757]	yes|up	1
ENSRNOG00000018426	Apoc1	apolipoprotein C1 [Source:RGD Symbol;Acc:2134]	yes|down	1
ENSRNOG00000018582	Exosc6	exosome component 6 [Source:RGD Symbol;Acc:1309832]	yes|down	1
ENSRNOG00000026136	Tnfaip8	TNF alpha induced protein 8 [Source:RGD Symbol;Acc:1305908]	yes|down	1
ENSRNOG00000024947	Fabp2	fatty acid binding protein 2 [Source:RGD Symbol;Acc:2591]	yes|up	1
ENSRNOG00000054560	Sh2d3c	SH2 domain containing 3C [Source:RGD Symbol;Acc:1307287]	yes|down	1
ENSRNOG00000008106	Shmt2	serine hydroxymethyltransferase 2 [Source:RGD Symbol;Acc:1308582]	yes|down	1
ENSRNOG00000010960	Ankh	ANKH inorganic pyrophosphate transport regulator [Source:RGD Symbol;Acc:619925]	yes|up	1
ENSRNOG00000010784	Scg3	secretogranin III [Source:RGD Symbol;Acc:621209]	yes|up	1
ENSRNOG00000060422	AC120076.1		yes|down	1
ENSRNOG00000010866	Tmem154	transmembrane protein 154 [Source:RGD Symbol;Acc:1563262]	yes|down	1
ENSRNOG00000022537	E2f8	E2F transcription factor 8 [Source:RGD Symbol;Acc:1308091]	yes|down	1
ENSRNOG00000000488	Hmga1	high mobility group AT-hook 1 [Source:RGD Symbol;Acc:628699]	yes|down	1
ENSRNOG00000050854	LOC108348101	chloride channel protein 2 [Source:RGD Symbol;Acc:11384925]	yes|up	1
ENSRNOG00000002653	Kcnk2	potassium two pore domain channel subfamily K member 2 [Source:RGD Symbol;Acc:621448]	yes|up	1
ENSRNOG00000032656	Ptprt	protein tyrosine phosphatase, receptor type, T [Source:RGD Symbol;Acc:1309653]	yes|down	1
ENSRNOG00000018603	Carns1	carnosine synthase 1 [Source:RGD Symbol;Acc:1308234]	yes|up	1
ENSRNOG00000046862	LOC108348137	armadillo repeat-containing X-linked protein 1 [Source:RGD Symbol;Acc:11440590]	yes|up	1
ENSRNOG00000037449	Pole	DNA polymerase epsilon, catalytic subunit [Source:RGD Symbol;Acc:1594540]	yes|down	1
ENSRNOG00000048917	LOC100909604	homeobox protein Hox-A6-like [Source:RGD Symbol;Acc:6502601]	yes|up	1
ENSRNOG00000003616	Grem2	gremlin 2, DAN family BMP antagonist [Source:RGD Symbol;Acc:1560008]	yes|up	1
ENSRNOG00000048915	Twf2	twinfilin actin-binding protein 2 [Source:RGD Symbol;Acc:1591460]	yes|down	1
ENSRNOG00000026310	March1	membrane associated ring-CH-type finger 1 [Source:RGD Symbol;Acc:1305148]	yes|down	1
ENSRNOG00000025448	Limd2	LIM domain containing 2 [Source:RGD Symbol;Acc:1309967]	yes|down	1
ENSRNOG00000061230	L1cam	L1 cell adhesion molecule [Source:RGD Symbol;Acc:619777]	yes|up	1
ENSRNOG00000018764	B3gnt3	UDP-GlcNAc:betaGal beta-1,3-N-acetylglucosaminyltransferase 3 [Source:RGD Symbol;Acc:1305151]	yes|down	1
ENSRNOG00000033335	Cenpi	centromere protein I [Source:RGD Symbol;Acc:2631]	yes|down	1
ENSRNOG00000008082	Rgs6	regulator of G-protein signaling 6 [Source:RGD Symbol;Acc:3569]	yes|up	1
ENSRNOG00000025117	Noxo1	NADPH oxidase organizer 1 [Source:RGD Symbol;Acc:1307802]	yes|down	1
ENSRNOG00000022320	Primpol	primase and DNA directed polymerase [Source:RGD Symbol;Acc:1562119]	yes|down	1
ENSRNOG00000019361	Inpp5j	inositol polyphosphate-5-phosphatase J [Source:RGD Symbol;Acc:620541]	yes|up	1
ENSRNOG00000022325	Smc2	structural maintenance of chromosomes 2 [Source:RGD Symbol;Acc:1305227]	yes|down	1
ENSRNOG00000025111	Nfkbid	NFKB inhibitor delta [Source:RGD Symbol;Acc:1308055]	yes|down	1
ENSRNOG00000019745	Actn3	actinin alpha 3 [Source:RGD Symbol;Acc:621792]	yes|down	1
ENSRNOG00000020514	Sox6	SRY box 6 [Source:RGD Symbol;Acc:1309000]	yes|up	1
ENSRNOG00000024931	Ccdc88b	coiled-coil domain containing 88B [Source:RGD Symbol;Acc:1311475]	yes|down	1
ENSRNOG00000008423	Gpr22	G protein-coupled receptor 22 [Source:RGD Symbol;Acc:1310848]	yes|up	1
ENSRNOG00000011321	Rftn1	raftlin lipid raft linker 1 [Source:RGD Symbol;Acc:1563347]	yes|down	1
ENSRNOG00000023814	Rimklb	ribosomal modification protein rimK-like family member B [Source:RGD Symbol;Acc:1560851]	yes|up	1
ENSRNOG00000047741	E2f2	E2F transcription factor 2 [Source:RGD Symbol;Acc:1593939]	yes|down	1
ENSRNOG00000007023	Galm	galactose mutarotase [Source:RGD Symbol;Acc:1359459]	yes|up	1
ENSRNOG00000048187	Epop	elongin BC and polycomb repressive complex 2 associated protein [Source:RGD Symbol;Acc:1587434]	yes|down	1
ENSRNOG00000002896	Prdx6	peroxiredoxin 6 [Source:RGD Symbol;Acc:71005]	yes|up	1
ENSRNOG00000060687	Slc24a3	solute carrier family 24 member 3 [Source:RGD Symbol;Acc:69256]	yes|up	1
ENSRNOG00000002711	Nuf2	NDC80 kinetochore complex component NUF2 [Source:RGD Symbol;Acc:1307952]	yes|down	1
ENSRNOG00000016553	Vwa5b1	von Willebrand factor A domain containing 5B1 [Source:RGD Symbol;Acc:1308559]	yes|up	1
ENSRNOG00000005637	Usp44	ubiquitin specific peptidase 44 [Source:RGD Symbol;Acc:1308216]	yes|down	1
ENSRNOG00000022391	Zfp711	zinc finger protein 711 [Source:RGD Symbol;Acc:1562768]	yes|up	1
ENSRNOG00000042101	Zfp93	zinc finger protein 93 [Source:RGD Symbol;Acc:1309760]	yes|down	1
ENSRNOG00000036880	Arl5c	ADP-ribosylation factor like GTPase 5C [Source:RGD Symbol;Acc:1563128]	yes|down	1
ENSRNOG00000016257	Cotl1	coactosin-like F-actin binding protein 1 [Source:RGD Symbol;Acc:1305498]	yes|down	1
ENSRNOG00000011631	Fst	follistatin [Source:RGD Symbol;Acc:2633]	yes|up	1
ENSRNOG00000033209	Bmp8b	bone morphogenetic protein 8b [Source:RGD Symbol;Acc:1591873]	yes|up	1
ENSRNOG00000025164	Bhlha15	basic helix-loop-helix family, member a15 [Source:RGD Symbol;Acc:3091]	yes|down	1
ENSRNOG00000028362	Unc80	unc-80 homolog, NALCN channel complex subunit [Source:RGD Symbol;Acc:1309976]	yes|up	1
ENSRNOG00000013727	Ndc80	NDC80 kinetochore complex component [Source:RGD Symbol;Acc:1310154]	yes|down	1
ENSRNOG00000045771	Chl1	cell adhesion molecule L1-like [Source:MGI Symbol;Acc:MGI:1098266]	yes|up	1
ENSRNOG00000015423	Ccna2	cyclin A2 [Source:RGD Symbol;Acc:621059]	yes|down	1
ENSRNOG00000007200	Ikzf3	IKAROS family zinc finger 3 [Source:RGD Symbol;Acc:1307024]	yes|down	1
ENSRNOG00000020245	Syt8	synaptotagmin 8 [Source:RGD Symbol;Acc:68399]	yes|down	1
ENSRNOG00000008553	Mthfr	methylenetetrahydrofolate reductase [Source:RGD Symbol;Acc:1309952]	yes|up	1
ENSRNOG00000022143	Dusp23	dual specificity phosphatase 23 [Source:RGD Symbol;Acc:1309202]	yes|up	1
ENSRNOG00000001823	St6gal1	ST6 beta-galactoside alpha-2,6-sialyltransferase 1 [Source:RGD Symbol;Acc:3676]	yes|down	1
ENSRNOG00000001827	Masp1	mannan-binding lectin serine peptidase 1 [Source:RGD Symbol;Acc:620213]	yes|down	1
ENSRNOG00000007290	Atp1a2	ATPase Na+/K+ transporting subunit alpha 2 [Source:RGD Symbol;Acc:2168]	yes|up	1
ENSRNOG00000019249	Ap3b2	adaptor related protein complex 3 subunit beta 2 [Source:RGD Symbol;Acc:1308950]	yes|up	1
ENSRNOG00000036677	Slc16a3	solute carrier family 16 member 3 [Source:RGD Symbol;Acc:620603]	yes|down	1
ENSRNOG00000021847	Ska3	spindle and kinetochore associated complex subunit 3 [Source:RGD Symbol;Acc:1307201]	yes|down	1
ENSRNOG00000001167	Ubash3a	ubiquitin associated and SH3 domain containing, A [Source:RGD Symbol;Acc:1310305]	yes|down	1
ENSRNOG00000043350	Cap2	cyclase associated actin cytoskeleton regulatory protein 2 [Source:RGD Symbol;Acc:620310]	yes|up	1
ENSRNOG00000019614	Ptpn22	protein tyrosine phosphatase, non-receptor type 22 [Source:RGD Symbol;Acc:1307992]	yes|down	1
ENSRNOG00000000413	Pln	phospholamban [Source:RGD Symbol;Acc:619894]	yes|up	1
ENSRNOG00000003769	Tmem163	transmembrane protein 163 [Source:RGD Symbol;Acc:1306212]	yes|down	1
ENSRNOG00000032729	Bex2	brain expressed X-linked 2 [Source:RGD Symbol;Acc:1564466]	yes|up	1
ENSRNOG00000003762	Smarca1	SWI/SNF related, matrix associated, actin dependent regulator of chromatin, subfamily a, member 1 [Source:RGD Symbol;Acc:1561046]	yes|up	1
ENSRNOG00000014979	Themis	thymocyte selection associated [Source:RGD Symbol;Acc:1560849]	yes|down	1
ENSRNOG00000013658	Nefl	neurofilament light [Source:RGD Symbol;Acc:621458]	yes|up	1
ENSRNOG00000007270	Il12rb2	interleukin 12 receptor subunit beta 2 [Source:RGD Symbol;Acc:620026]	yes|up	1
ENSRNOG00000012318	Aspm	abnormal spindle microtubule assembly [Source:RGD Symbol;Acc:1307111]	yes|down	1
ENSRNOG00000013794	Rbp1	retinol binding protein 1 [Source:RGD Symbol;Acc:3543]	yes|down	1
ENSRNOG00000050000	AABR07034739.1	Ig lambda-2 chain C region [Source:UniProtKB/Swiss-Prot;Acc:P20767]	yes|down	1
ENSRNOG00000004089	Enpp2	ectonucleotide pyrophosphatase/phosphodiesterase 2 [Source:RGD Symbol;Acc:69298]	yes|down	1
ENSRNOG00000012311	Slc35d3	solute carrier family 35, member D3 [Source:RGD Symbol;Acc:1309428]	yes|up	1
ENSRNOG00000013654	Cbln2	cerebellin 2 precursor [Source:RGD Symbol;Acc:1309715]	yes|up	1
ENSRNOG00000013657	Stmn3	stathmin 3 [Source:RGD Symbol;Acc:3628]	yes|up	1
ENSRNOG00000046240	AABR07022023.1		yes|up	1
ENSRNOG00000007475	Gpihbp1	glycosylphosphatidylinositol anchored high density lipoprotein binding protein 1 [Source:RGD Symbol;Acc:1564237]	yes|down	1
ENSRNOG00000017766	Car12	carbonic anhydrase 12 [Source:RGD Symbol;Acc:1306612]	yes|up	1
ENSRNOG00000056297	Fmnl3	formin-like 3 [Source:RGD Symbol;Acc:1583854]	yes|down	1
ENSRNOG00000056290	AABR07061052.1		yes|down	1
ENSRNOG00000005565	Traf3ip3	TRAF3 interacting protein 3 [Source:RGD Symbol;Acc:1304848]	yes|down	1
ENSRNOG00000012302	Gucy1a1	guanylate cyclase 1 soluble subunit alpha 1 [Source:RGD Symbol;Acc:68436]	yes|up	1
ENSRNOG00000024641	LOC100910838	neuronal tyrosine-phosphorylated phosphoinositide-3-kinase adapter 1-like [Source:RGD Symbol;Acc:6496186]	yes|up	1
ENSRNOG00000015585	Suv39h2	suppressor of variegation 3-9 homolog 2 [Source:RGD Symbol;Acc:1306969]	yes|down	1
ENSRNOG00000002568	Socs1	suppressor of cytokine signaling 1 [Source:RGD Symbol;Acc:69272]	yes|down	1
ENSRNOG00000020248	Ina	internexin neuronal intermediate filament protein, alpha [Source:RGD Symbol;Acc:2911]	yes|up	1
ENSRNOG00000029308	Lrmp	lymphoid-restricted membrane protein [Source:NCBI gene;Acc:500361]	yes|down	1
ENSRNOG00000026866	Syn3	synapsin III [Source:RGD Symbol;Acc:3799]	yes|up	1
ENSRNOG00000033444	F10	coagulation factor X [Source:RGD Symbol;Acc:61850]	yes|down	1
ENSRNOG00000038365	Plekha2	pleckstrin homology domain containing A2 [Source:RGD Symbol;Acc:1586710]	yes|down	1
ENSRNOG00000031930	Bin2	bridging integrator 2 [Source:RGD Symbol;Acc:1306789]	yes|down	1
ENSRNOG00000014960	Bard1	BRCA1 associated RING domain 1 [Source:RGD Symbol;Acc:621072]	yes|down	1
ENSRNOG00000016595	Hhex	hematopoietically expressed homeobox [Source:RGD Symbol;Acc:619932]	yes|down	1
ENSRNOG00000034164	Cr2	complement C3d receptor 2 [Source:RGD Symbol;Acc:1310065]	yes|down	1
ENSRNOG00000015581	Dnah6	dynein, axonemal, heavy chain 6 [Source:RGD Symbol;Acc:621797]	yes|down	1
ENSRNOG00000028781	Abcc6	ATP binding cassette subfamily C member 6 [Source:RGD Symbol;Acc:620268]	yes|up	1
ENSRNOG00000031916	Timeless	timeless circadian regulator [Source:RGD Symbol;Acc:620939]	yes|down	1
ENSRNOG00000037124	Fam227b	family with sequence similarity 227, member B [Source:RGD Symbol;Acc:1359452]	yes|up	1
ENSRNOG00000024420	Eme1	essential meiotic structure-specific endonuclease 1 [Source:RGD Symbol;Acc:1309067]	yes|down	1
ENSRNOG00000020769	Crebrf	CREB3 regulatory factor [Source:RGD Symbol;Acc:1310862]	yes|up	1
ENSRNOG00000024428	Kif20a	kinesin family member 20A [Source:RGD Symbol;Acc:1307695]	yes|down	1
ENSRNOG00000013389	AABR07007916.1	regulator of G-protein signaling 7 binding protein [Source:NCBI gene;Acc:294715]	yes|up	1
ENSRNOG00000014296	Syt10	synaptotagmin 10 [Source:RGD Symbol;Acc:62041]	yes|up	1
ENSRNOG00000020945	Ms4a1	membrane spanning 4-domains A1 [Source:RGD Symbol;Acc:1311999]	yes|down	1
ENSRNOG00000001057	Ctxn1	cortexin 1 [Source:RGD Symbol;Acc:2449]	yes|up	1
ENSRNOG00000013970	Cdt1	chromatin licensing and DNA replication factor 1 [Source:RGD Symbol;Acc:1309211]	yes|down	1
ENSRNOG00000013971	Psat1	phosphoserine aminotransferase 1 [Source:RGD Symbol;Acc:735170]	yes|down	1
ENSRNOG00000016593	Pde6c	phosphodiesterase 6C [Source:RGD Symbol;Acc:1309844]	yes|down	1
ENSRNOG00000002496	Stxbp5l	syntaxin binding protein 5-like [Source:RGD Symbol;Acc:1311561]	yes|up	1
ENSRNOG00000046086	Tmc8	transmembrane channel-like 8 [Source:RGD Symbol;Acc:1591150]	yes|down	1
ENSRNOG00000001752	Nrros	negative regulator of reactive oxygen species [Source:RGD Symbol;Acc:1310771]	yes|down	1
ENSRNOG00000003262	Cacng4	calcium voltage-gated channel auxiliary subunit gamma 4 [Source:RGD Symbol;Acc:628804]	yes|up	1
ENSRNOG00000051950	Cnga3	cyclic nucleotide gated channel alpha 3 [Source:RGD Symbol;Acc:70948]	yes|up	1
ENSRNOG00000051951	AABR07034592.1		yes|up	1
ENSRNOG00000002318	Limch1	LIM and calponin homology domains 1 [Source:RGD Symbol;Acc:1305269]	yes|up	1
ENSRNOG00000002312	Atp10d	ATPase phospholipid transporting 10D (putative) [Source:RGD Symbol;Acc:1588541]	yes|down	1
ENSRNOG00000049911	LOC102556347	carbonyl reductase [NADPH] 1-like [Source:RGD Symbol;Acc:7631561]	yes|up	1
ENSRNOG00000022868	Ell3	elongation factor for RNA polymerase II 3 [Source:RGD Symbol;Acc:1309917]	yes|down	1
ENSRNOG00000007879	Stk26	serine/threonine kinase 26 [Source:RGD Symbol;Acc:1563568]	yes|down	1
ENSRNOG00000025075	Relt	RELT, TNF receptor [Source:RGD Symbol;Acc:1305381]	yes|down	1
