# Supplementary material for: Xuedan Sustained Release Pellets Ameliorate Dextran Sulfate Sodium–Induced Ulcerative Colitis in Rats by Targeting Gut Microbiota and MAPK Signaling Pathways
Source: Frontiers journal article supplement (doi:10.3389/fphar.2022.833972), 2022-04-20
Supplement: Data_Sheet_1.ZIP [file Figure3 AB.xlsx]

## Sheet: H & E score
	Score
	Epithelial injury	Inflammatory infiltration
Control	1	0
	0	0
	0	0
DSS	3	3
	3	3
	3	3
LXSP	1	1
	1	2
	1	1
MXSP	1	2
	1	1
	1	1
HXSP	2	3
	1	0
	2	1

## Sheet: NO
No.	Control	DSS	LXSP	MXSP	HXSP
1	4.84	20.124	7.646	5.686	12.384
2	3.704	16.013	7.507	8.763	11.284
3	3.122	19.08	7.038	9.283	6.57
4	7.801	20.562	7.551	5.535	10.185
5	6.687	15.633	13.628	6.833	11.841
6	7.075	20.458	6.972	5.859	10.269
7	5.39	20.545	8.801	10.068	5.136

## Sheet: MPO
No.	Control	DSS	LXSP	MXSP	HXSP
1	16.047	38.262	17.772	12.689	24.445
2	8.24	34.302	19.34	20.062	19.74
3	13.293	30.842	16.693	16.982	22.695
4	11.349	37.515	15.938	13.769	25.054
5	13.418	34.942	22.86	20.263	20.693
6	16.085	29.709	20.774	16.398	19.885
