# Supplementary material for: Xuedan Sustained Release Pellets Ameliorate Dextran Sulfate Sodium–Induced Ulcerative Colitis in Rats by Targeting Gut Microbiota and MAPK Signaling Pathways
Source: Front Pharmacol. 2022 Apr 20;13:833972. doi: 10.3389/fphar.2022.833972 (PMC9149600; doi:10.3389/fphar.2022.833972)
Supplement: Supplementary file 1 [file Table1.XLS]

## Sheet: KEGG富集分析统计表
Num	Pathway id	Description	Database	Ratio_in_study	Ratio_in_pop	Pvalue	Padjust	First Category	Second Category
61	map04060	Cytokine-cytokine receptor interaction	KEGG PATHWAY	61/1261	290/18102	4.12601e-15	1.27081e-12	Environmental Information Processing	Signaling molecules and interaction
45	map04660	T cell receptor signaling pathway	KEGG PATHWAY	45/1261	212/18102	1.21593e-11	1.87253e-09	Organismal Systems	Immune system
45	map04659	Th17 cell differentiation	KEGG PATHWAY	45/1261	225/18102	9.96861e-11	7.67583e-09	Organismal Systems	Immune system
41	map04658	Th1 and Th2 cell differentiation	KEGG PATHWAY	41/1261	193/18102	9.66567e-11	9.92342e-09	Organismal Systems	Immune system
63	map05166	Human T-cell leukemia virus 1 infection	KEGG PATHWAY	63/1261	405/18102	1.36296e-09	8.39584e-08	Human Diseases	Infectious disease: viral
51	map04514	Cell adhesion molecules (CAMs)	KEGG PATHWAY	51/1261	304/18102	3.89264e-09	1.99822e-07	Environmental Information Processing	Signaling molecules and interaction
47	map04672	Intestinal immune network for IgA production	KEGG PATHWAY	47/1261	277/18102	1.09669e-08	4.82544e-07	Organismal Systems	Immune system
31	map04110	Cell cycle	KEGG PATHWAY	31/1261	144/18102	1.32155e-08	5.08797e-07	Cellular Processes	Cell growth and death
42	map04640	Hematopoietic cell lineage	KEGG PATHWAY	42/1261	238/18102	2.06508e-08	7.06717e-07	Organismal Systems	Immune system
37	map04062	Chemokine signaling pathway	KEGG PATHWAY	37/1261	204/18102	6.83789e-08	2.10607e-06	Organismal Systems	Immune system
51	map05323	Rheumatoid arthritis	KEGG PATHWAY	51/1261	332/18102	7.65121e-08	2.14234e-06	Human Diseases	Immune disease
29	map04380	Osteoclast differentiation	KEGG PATHWAY	29/1261	147/18102	2.8257e-07	7.25262e-06	Organismal Systems	Development and regeneration
36	map04662	B cell receptor signaling pathway	KEGG PATHWAY	36/1261	214/18102	6.95356e-07	1.64746e-05	Organismal Systems	Immune system
35	map05140	Leishmaniasis	KEGG PATHWAY	35/1261	215/18102	2.15956e-06	4.43429e-05	Human Diseases	Infectious disease: parasitic
29	map05321	Inflammatory bowel disease (IBD)	KEGG PATHWAY	29/1261	161/18102	2.0165e-06	4.43631e-05	Human Diseases	Immune disease
46	map04064	NF-kappa B signaling pathway	KEGG PATHWAY	46/1261	328/18102	4.33868e-06	8.35196e-05	Environmental Information Processing	Signal transduction
57	map04020	Calcium signaling pathway	KEGG PATHWAY	57/1261	442/18102	4.77579e-06	8.65261e-05	Environmental Information Processing	Signal transduction
62	map05169	Epstein-Barr virus infection	KEGG PATHWAY	62/1261	522/18102	2.54701e-05	0.000435821	Human Diseases	Infectious disease: viral
12	map03030	DNA replication	KEGG PATHWAY	12/1261	45/18102	4.12822e-05	0.000635747	Genetic Information Processing	Replication and repair
32	map05142	Chagas disease (American trypanosomiasis)	KEGG PATHWAY	32/1261	216/18102	4.10283e-05	0.00066509	Human Diseases	Infectious disease: parasitic
24	map05145	Toxoplasmosis	KEGG PATHWAY	24/1261	144/18102	5.5882e-05	0.000819603	Human Diseases	Infectious disease: parasitic
21	map04713	Circadian entrainment	KEGG PATHWAY	21/1261	122/18102	9.92267e-05	0.00138917	Organismal Systems	Environmental adaptation
35	map04650	Natural killer cell mediated cytotoxicity	KEGG PATHWAY	35/1261	258/18102	0.000115425	0.00154569	Organismal Systems	Immune system
13	map04930	Type II diabetes mellitus	KEGG PATHWAY	13/1261	58/18102	0.000140956	0.00166979	Human Diseases	Endocrine and metabolic disease
22	map04725	Cholinergic synapse	KEGG PATHWAY	22/1261	134/18102	0.000140765	0.00173423	Organismal Systems	Nervous system
29	map05340	Primary immunodeficiency	KEGG PATHWAY	29/1261	200/18102	0.000135758	0.00174223	Human Diseases	Immune disease
35	map05310	Asthma	KEGG PATHWAY	35/1261	263/18102	0.000169084	0.00192881	Human Diseases	Immune disease
28	map04022	cGMP-PKG signaling pathway	KEGG PATHWAY	28/1261	201/18102	0.000345609	0.0038017	Environmental Information Processing	Signal transduction
17	map04970	Salivary secretion	KEGG PATHWAY	17/1261	100/18102	0.000513087	0.00544934	Organismal Systems	Digestive system
36	map05150	Staphylococcus aureus infection	KEGG PATHWAY	36/1261	296/18102	0.000781234	0.00776194	Human Diseases	Infectious disease: bacterial
19	map04668	TNF signaling pathway	KEGG PATHWAY	19/1261	122/18102	0.000765452	0.00785864	Environmental Information Processing	Signal transduction
27	map04940	Type I diabetes mellitus	KEGG PATHWAY	27/1261	202/18102	0.000836038	0.00804687	Human Diseases	Endocrine and metabolic disease
45	map05162	Measles	KEGG PATHWAY	45/1261	399/18102	0.00095358	0.00890008	Human Diseases	Infectious disease: viral
14	map04924	Renin secretion	KEGG PATHWAY	14/1261	79/18102	0.00102213	0.00925927	Organismal Systems	Endocrine system
25	map05332	Graft-versus-host disease	KEGG PATHWAY	25/1261	186/18102	0.00117983	0.0100941	Human Diseases	Immune disease
29	map04024	cAMP signaling pathway	KEGG PATHWAY	29/1261	228/18102	0.0012164	0.0101257	Environmental Information Processing	Signal transduction
30	map04666	Fc gamma R-mediated phagocytosis	KEGG PATHWAY	30/1261	239/18102	0.00125091	0.010139	Organismal Systems	Immune system
14	map04920	Adipocytokine signaling pathway	KEGG PATHWAY	14/1261	80/18102	0.00116104	0.0102171	Organismal Systems	Endocrine system
12	map02010	ABC transporters	KEGG PATHWAY	12/1261	65/18102	0.00158883	0.0125476	Environmental Information Processing	Membrane transport
37	map05330	Allograft rejection	KEGG PATHWAY	37/1261	323/18102	0.00197367	0.0148266	Human Diseases	Immune disease
38	map05320	Autoimmune thyroid disease	KEGG PATHWAY	38/1261	334/18102	0.0019535	0.0150419	Human Diseases	Immune disease
41	map04014	Ras signaling pathway	KEGG PATHWAY	41/1261	376/18102	0.00291801	0.0209011	Environmental Information Processing	Signal transduction
39	map04010	MAPK signaling pathway	KEGG PATHWAY	39/1261	353/18102	0.00289894	0.0212589	Environmental Information Processing	Signal transduction
5	map00604	Glycosphingolipid biosynthesis - ganglio series	KEGG PATHWAY	5/1261	16/18102	0.0037154	0.0260078	Metabolism	Glycan biosynthesis and metabolism
38	map05152	Tuberculosis	KEGG PATHWAY	38/1261	356/18102	0.00576826	0.0394806	Human Diseases	Infectious disease: bacterial
24	map04360	Axon guidance	KEGG PATHWAY	24/1261	199/18102	0.00604198	0.0395943	Organismal Systems	Development and regeneration
19	map04726	Serotonergic synapse	KEGG PATHWAY	19/1261	146/18102	0.00617298	0.03961	Organismal Systems	Nervous system
35	map04080	Neuroactive ligand-receptor interaction	KEGG PATHWAY	35/1261	322/18102	0.00594475	0.039804	Environmental Information Processing	Signaling molecules and interaction
16	map04914	Progesterone-mediated oocyte maturation	KEGG PATHWAY	16/1261	117/18102	0.0071525	0.0449586	Organismal Systems	Endocrine system
9	map04979	Cholesterol metabolism	KEGG PATHWAY	9/1261	52/18102	0.00910131	0.0560641	Organismal Systems	Digestive system
19	map05144	Malaria	KEGG PATHWAY	19/1261	153/18102	0.0100803	0.060877	Human Diseases	Infectious disease: parasitic
14	map03320	PPAR signaling pathway	KEGG PATHWAY	14/1261	103/18102	0.0120091	0.071131	Organismal Systems	Endocrine system
15	map04972	Pancreatic secretion	KEGG PATHWAY	15/1261	114/18102	0.0126869	0.0737275	Organismal Systems	Digestive system
24	map04664	Fc epsilon RI signaling pathway	KEGG PATHWAY	24/1261	213/18102	0.0135226	0.0757263	Organismal Systems	Immune system
4	map00533	Glycosaminoglycan biosynthesis - keratan sulfate	KEGG PATHWAY	4/1261	14/18102	0.0133367	0.0760687	Metabolism	Glycan biosynthesis and metabolism
60	map05200	Pathways in cancer	KEGG PATHWAY	60/1261	647/18102	0.0141248	0.0763234	Human Diseases	Cancer: overview
13	map04911	Insulin secretion	KEGG PATHWAY	13/1261	95/18102	0.0143747	0.0763344	Organismal Systems	Endocrine system
20	map04934	Cushing syndrome	KEGG PATHWAY	20/1261	169/18102	0.0139707	0.076839	Human Diseases	Endocrine and metabolic disease
14	map04620	Toll-like receptor signaling pathway	KEGG PATHWAY	14/1261	106/18102	0.0152243	0.0794759	Organismal Systems	Immune system
6	map00512	Mucin type O-glycan biosynthesis	KEGG PATHWAY	6/1261	30/18102	0.0157936	0.0810737	Metabolism	Glycan biosynthesis and metabolism
27	map04612	Antigen processing and presentation	KEGG PATHWAY	27/1261	253/18102	0.0179079	0.0889617	Organismal Systems	Immune system
20	map04261	Adrenergic signaling in cardiomyocytes	KEGG PATHWAY	20/1261	173/18102	0.0176692	0.0892149	Organismal Systems	Circulatory system
5	map00220	Arginine biosynthesis	KEGG PATHWAY	5/1261	23/18102	0.0190733	0.0932471	Metabolism	Amino acid metabolism
19	map04926	Relaxin signaling pathway	KEGG PATHWAY	19/1261	164/18102	0.0199723	0.0961165	Organismal Systems	Endocrine system
12	map04115	p53 signaling pathway	KEGG PATHWAY	12/1261	89/18102	0.020308	0.0962289	Cellular Processes	Cell growth and death
14	map04925	Aldosterone synthesis and secretion	KEGG PATHWAY	14/1261	112/18102	0.02359	0.110087	Organismal Systems	Endocrine system
13	map05032	Morphine addiction	KEGG PATHWAY	13/1261	102/18102	0.0246965	0.11353	Human Diseases	Substance dependence
17	map04114	Oocyte meiosis	KEGG PATHWAY	17/1261	147/18102	0.0271011	0.120973	Cellular Processes	Cell growth and death
42	map05202	Transcriptional misregulation in cancer	KEGG PATHWAY	42/1261	444/18102	0.0268275	0.121513	Human Diseases	Cancer: overview
39	map05322	Systemic lupus erythematosus	KEGG PATHWAY	39/1261	410/18102	0.0296312	0.130377	Human Diseases	Immune disease
14	map04657	IL-17 signaling pathway	KEGG PATHWAY	14/1261	116/18102	0.0308158	0.13368	Organismal Systems	Immune system
18	map04728	Dopaminergic synapse	KEGG PATHWAY	18/1261	161/18102	0.0315938	0.135151	Organismal Systems	Nervous system
19	map05226	Gastric cancer	KEGG PATHWAY	19/1261	173/18102	0.0325986	0.135681	Human Diseases	Cancer: specific types
8	map00380	Tryptophan metabolism	KEGG PATHWAY	8/1261	54/18102	0.032352	0.136499	Metabolism	Amino acid metabolism
22	map00230	Purine metabolism	KEGG PATHWAY	22/1261	211/18102	0.0378942	0.155619	Metabolism	Nucleotide metabolism
12	map04727	GABAergic synapse	KEGG PATHWAY	12/1261	98/18102	0.0394618	0.159924	Organismal Systems	Nervous system
14	map00240	Pyrimidine metabolism	KEGG PATHWAY	14/1261	121/18102	0.0419642	0.167857	Metabolism	Nucleotide metabolism
5	map04950	Maturity onset diabetes of the young	KEGG PATHWAY	5/1261	29/18102	0.0477738	0.188645	Human Diseases	Endocrine and metabolic disease
5	map00601	Glycosphingolipid biosynthesis - lacto and neolacto series	KEGG PATHWAY	5/1261	29/18102	0.0477738	0.188645	Metabolism	Glycan biosynthesis and metabolism
9	map05014	Amyotrophic lateral sclerosis (ALS)	KEGG PATHWAY	9/1261	69/18102	0.0492761	0.189713	Human Diseases	Neurodegenerative disease
15	map04625	C-type lectin receptor signaling pathway	KEGG PATHWAY	15/1261	136/18102	0.0515793	0.196129	Organismal Systems	Immune system
12	map00590	Arachidonic acid metabolism	KEGG PATHWAY	12/1261	103/18102	0.0543483	0.204137	Metabolism	Lipid metabolism
12	map04350	TGF-beta signaling pathway	KEGG PATHWAY	12/1261	104/18102	0.0577251	0.20436	Environmental Information Processing	Signal transduction
16	map04550	Signaling pathways regulating pluripotency of stem cells	KEGG PATHWAY	16/1261	150/18102	0.0584051	0.204418	Cellular Processes	Cellular community - eukaryotes
14	map04933	AGE-RAGE signaling pathway in diabetic complications	KEGG PATHWAY	14/1261	126/18102	0.0556997	0.206693	Human Diseases	Endocrine and metabolic disease
18	map05224	Breast cancer	KEGG PATHWAY	18/1261	174/18102	0.059805	0.206966	Human Diseases	Cancer: specific types
9	map05120	Epithelial cell signaling in Helicobacter pylori infection	KEGG PATHWAY	9/1261	71/18102	0.0573397	0.207772	Human Diseases	Infectious disease: bacterial
9	map04721	Synaptic vesicle cycle	KEGG PATHWAY	9/1261	71/18102	0.0573397	0.207772	Organismal Systems	Nervous system
7	map04975	Fat digestion and absorption	KEGG PATHWAY	7/1261	50/18102	0.0568343	0.208393	Organismal Systems	Digestive system
13	map05231	Choline metabolism in cancer	KEGG PATHWAY	13/1261	117/18102	0.0635442	0.217462	Human Diseases	Cancer: overview
9	map04927	Cortisol synthesis and secretion	KEGG PATHWAY	9/1261	73/18102	0.0662081	0.224089	Organismal Systems	Endocrine system
1	map00660	C5-Branched dibasic acid metabolism	KEGG PATHWAY	1/1261	1/18102	0.0696608	0.233212	Metabolism	Carbohydrate metabolism
10	map04730	Long-term depression	KEGG PATHWAY	10/1261	85/18102	0.0708057	0.234496	Organismal Systems	Nervous system
4	map00670	One carbon pool by folate	KEGG PATHWAY	4/1261	23/18102	0.0719081	0.235614	Metabolism	Metabolism of cofactors and vitamins
6	map05033	Nicotine addiction	KEGG PATHWAY	6/1261	43/18102	0.075893	0.246053	Human Diseases	Substance dependence
19	map04630	Jak-STAT signaling pathway	KEGG PATHWAY	19/1261	192/18102	0.0771507	0.247525	Environmental Information Processing	Signal transduction
14	map04724	Glutamatergic synapse	KEGG PATHWAY	14/1261	133/18102	0.0796463	0.250317	Organismal Systems	Nervous system
8	map00330	Arginine and proline metabolism	KEGG PATHWAY	8/1261	65/18102	0.0810455	0.252142	Metabolism	Amino acid metabolism
7	map05030	Cocaine addiction	KEGG PATHWAY	7/1261	54/18102	0.0796126	0.252791	Human Diseases	Substance dependence
8	map04623	Cytosolic DNA-sensing pathway	KEGG PATHWAY	8/1261	66/18102	0.0868937	0.267633	Organismal Systems	Immune system
8	map04923	Regulation of lipolysis in adipocytes	KEGG PATHWAY	8/1261	67/18102	0.0929812	0.278041	Organismal Systems	Endocrine system
7	map03460	Fanconi anemia pathway	KEGG PATHWAY	7/1261	56/18102	0.0927243	0.279991	Genetic Information Processing	Replication and repair
9	map05031	Amphetamine addiction	KEGG PATHWAY	9/1261	78/18102	0.0919679	0.280456	Human Diseases	Substance dependence
10	map04146	Peroxisome	KEGG PATHWAY	10/1261	93/18102	0.112401	0.332879	Cellular Processes	Transport and catabolism
13	map04931	Insulin resistance	KEGG PATHWAY	13/1261	129/18102	0.114508	0.33589	Human Diseases	Endocrine and metabolic disease
18	map04723	Retrograde endocannabinoid signaling	KEGG PATHWAY	18/1261	191/18102	0.117857	0.342454	Organismal Systems	Nervous system
8	map00980	Metabolism of xenobiotics by cytochrome P450	KEGG PATHWAY	8/1261	71/18102	0.119688	0.344522	Metabolism	Xenobiotics biodegradation and metabolism
9	map04918	Thyroid hormone synthesis	KEGG PATHWAY	9/1261	83/18102	0.122838	0.347101	Organismal Systems	Endocrine system
25	map05168	Herpes simplex virus 1 infection	KEGG PATHWAY	25/1261	282/18102	0.127711	0.348096	Human Diseases	Infectious disease: viral
15	map04270	Vascular smooth muscle contraction	KEGG PATHWAY	15/1261	155/18102	0.122676	0.349855	Organismal Systems	Circulatory system
4	map03430	Mismatch repair	KEGG PATHWAY	4/1261	28/18102	0.127051	0.352538	Genetic Information Processing	Replication and repair
4	map00340	Histidine metabolism	KEGG PATHWAY	4/1261	28/18102	0.127051	0.352538	Metabolism	Amino acid metabolism
3	map00120	Primary bile acid biosynthesis	KEGG PATHWAY	3/1261	18/18102	0.126032	0.352889	Metabolism	Lipid metabolism
11	map05204	Chemical carcinogenesis	KEGG PATHWAY	11/1261	108/18102	0.131299	0.354737	Human Diseases	Cancer: overview
16	map05161	Hepatitis B	KEGG PATHWAY	16/1261	170/18102	0.135351	0.362506	Human Diseases	Infectious disease: viral
5	map00410	beta-Alanine metabolism	KEGG PATHWAY	5/1261	40/18102	0.143042	0.376556	Metabolism	Metabolism of other amino acids
3	map00910	Nitrogen metabolism	KEGG PATHWAY	3/1261	19/18102	0.142321	0.377886	Metabolism	Energy metabolism
9	map05133	Pertussis	KEGG PATHWAY	9/1261	87/18102	0.151063	0.390987	Human Diseases	Infectious disease: bacterial
9	map04971	Gastric acid secretion	KEGG PATHWAY	9/1261	87/18102	0.151063	0.390987	Organismal Systems	Digestive system
24	map05167	Kaposi sarcoma-associated herpesvirus infection	KEGG PATHWAY	24/1261	275/18102	0.150077	0.391726	Human Diseases	Infectious disease: viral
5	map00250	Alanine, aspartate and glutamate metabolism	KEGG PATHWAY	5/1261	41/18102	0.154183	0.392466	Metabolism	Amino acid metabolism
11	map05210	Colorectal cancer	KEGG PATHWAY	11/1261	113/18102	0.163423	0.412576	Human Diseases	Cancer: specific types
9	map04742	Taste transduction	KEGG PATHWAY	9/1261	92/18102	0.190384	0.47289	Organismal Systems	Sensory system
19	map04621	NOD-like receptor signaling pathway	KEGG PATHWAY	19/1261	219/18102	0.190297	0.476516	Organismal Systems	Immune system
1	map00981	Insect hormone biosynthesis	KEGG PATHWAY	1/1261	3/18102	0.194773	0.47992	Metabolism	Metabolism of terpenoids and polyketides
25	map04072	Phospholipase D signaling pathway	KEGG PATHWAY	25/1261	301/18102	0.206669	0.505192	Environmental Information Processing	Signal transduction
4	map00760	Nicotinate and nicotinamide metabolism	KEGG PATHWAY	4/1261	34/18102	0.209653	0.508449	Metabolism	Metabolism of cofactors and vitamins
5	map01523	Antifolate resistance	KEGG PATHWAY	5/1261	46/18102	0.21467	0.512546	Human Diseases	Drug resistance: antineoplastic
3	map00514	Other types of O-glycan biosynthesis	KEGG PATHWAY	3/1261	23/18102	0.21321	0.513036	Metabolism	Glycan biosynthesis and metabolism
14	map04068	FoxO signaling pathway	KEGG PATHWAY	14/1261	159/18102	0.218307	0.517221	Environmental Information Processing	Signal transduction
11	map04540	Gap junction	KEGG PATHWAY	11/1261	121/18102	0.221911	0.521745	Cellular Processes	Cellular community - eukaryotes
5	map05216	Thyroid cancer	KEGG PATHWAY	5/1261	47/18102	0.227578	0.531015	Human Diseases	Cancer: specific types
8	map00480	Glutathione metabolism	KEGG PATHWAY	8/1261	84/18102	0.229742	0.532035	Metabolism	Metabolism of other amino acids
8	map00562	Inositol phosphate metabolism	KEGG PATHWAY	8/1261	84/18102	0.229742	0.532035	Metabolism	Carbohydrate metabolism
4	map04392	Hippo signaling pathway - multiple species	KEGG PATHWAY	4/1261	36/18102	0.239984	0.547518	Environmental Information Processing	Signal transduction
10	map04070	Phosphatidylinositol signaling system	KEGG PATHWAY	10/1261	111/18102	0.24466	0.554084	Environmental Information Processing	Signal transduction
21	map05146	Amoebiasis	KEGG PATHWAY	21/1261	258/18102	0.25991	0.563748	Human Diseases	Infectious disease: parasitic
2	map03450	Non-homologous end-joining	KEGG PATHWAY	2/1261	14/18102	0.254625	0.564205	Genetic Information Processing	Replication and repair
2	map00061	Fatty acid biosynthesis	KEGG PATHWAY	2/1261	14/18102	0.254625	0.564205	Metabolism	Lipid metabolism
3	map00592	alpha-Linolenic acid metabolism	KEGG PATHWAY	3/1261	25/18102	0.251054	0.564414	Metabolism	Lipid metabolism
8	map04976	Bile secretion	KEGG PATHWAY	8/1261	87/18102	0.259179	0.566151	Organismal Systems	Digestive system
5	map00260	Glycine, serine and threonine metabolism	KEGG PATHWAY	5/1261	49/18102	0.254029	0.566962	Metabolism	Amino acid metabolism
9	map00983	Drug metabolism - other enzymes	KEGG PATHWAY	9/1261	101/18102	0.270488	0.574555	Metabolism	Xenobiotics biodegradation and metabolism
3	map04964	Proximal tubule bicarbonate reclamation	KEGG PATHWAY	3/1261	26/18102	0.270333	0.578212	Organismal Systems	Excretory system
8	map00830	Retinol metabolism	KEGG PATHWAY	8/1261	88/18102	0.269239	0.579899	Metabolism	Metabolism of cofactors and vitamins
2	map00603	Glycosphingolipid biosynthesis - globo and isoglobo series	KEGG PATHWAY	2/1261	15/18102	0.281208	0.589198	Metabolism	Glycan biosynthesis and metabolism
5	map04624	Toll and Imd signaling pathway	KEGG PATHWAY	5/1261	51/18102	0.281179	0.593173	Organismal Systems	Immune system
4	map01040	Biosynthesis of unsaturated fatty acids	KEGG PATHWAY	4/1261	39/18102	0.287116	0.597511	Metabolism	Lipid metabolism
11	map05215	Prostate cancer	KEGG PATHWAY	11/1261	132/18102	0.313365	0.639182	Human Diseases	Cancer: specific types
14	map05143	African trypanosomiasis	KEGG PATHWAY	14/1261	172/18102	0.311972	0.640583	Human Diseases	Infectious disease: parasitic
10	map04974	Protein digestion and absorption	KEGG PATHWAY	10/1261	119/18102	0.316161	0.640642	Organismal Systems	Digestive system
6	map04370	VEGF signaling pathway	KEGG PATHWAY	6/1261	66/18102	0.311042	0.642959	Environmental Information Processing	Signal transduction
5	map03420	Nucleotide excision repair	KEGG PATHWAY	5/1261	55/18102	0.336885	0.678173	Genetic Information Processing	Replication and repair
8	map04512	ECM-receptor interaction	KEGG PATHWAY	8/1261	96/18102	0.352901	0.692315	Environmental Information Processing	Signaling molecules and interaction
4	map05020	Prion diseases	KEGG PATHWAY	4/1261	43/18102	0.351585	0.694155	Human Diseases	Neurodegenerative disease
7	map05223	Non-small cell lung cancer	KEGG PATHWAY	7/1261	83/18102	0.357239	0.69639	Human Diseases	Cancer: specific types
2	map00053	Ascorbate and aldarate metabolism	KEGG PATHWAY	2/1261	18/18102	0.360002	0.697363	Metabolism	Carbohydrate metabolism
5	map00620	Pyruvate metabolism	KEGG PATHWAY	5/1261	56/18102	0.350981	0.697432	Metabolism	Carbohydrate metabolism
6	map05217	Basal cell carcinoma	KEGG PATHWAY	6/1261	69/18102	0.348733	0.697466	Human Diseases	Cancer: specific types
8	map04610	Complement and coagulation cascades	KEGG PATHWAY	8/1261	97/18102	0.363624	0.699976	Organismal Systems	Immune system
8	map04917	Prolactin signaling pathway	KEGG PATHWAY	8/1261	98/18102	0.374376	0.716198	Organismal Systems	Endocrine system
46	map05416	Viral myocarditis	KEGG PATHWAY	46/1261	628/18102	0.382385	0.718137	Human Diseases	Cardiovascular disease
13	map04310	Wnt signaling pathway	KEGG PATHWAY	13/1261	167/18102	0.380359	0.718715	Environmental Information Processing	Signal transduction
2	map00450	Selenocompound metabolism	KEGG PATHWAY	2/1261	19/18102	0.385612	0.719809	Metabolism	Metabolism of other amino acids
9	map05222	Small cell lung cancer	KEGG PATHWAY	9/1261	112/18102	0.378643	0.719889	Human Diseases	Cancer: specific types
9	map01522	Endocrine resistance	KEGG PATHWAY	9/1261	113/18102	0.388736	0.72127	Human Diseases	Drug resistance: antineoplastic
9	map04916	Melanogenesis	KEGG PATHWAY	9/1261	116/18102	0.419068	0.733369	Organismal Systems	Endocrine system
8	map04013	MAPK signaling pathway - fly	KEGG PATHWAY	8/1261	102/18102	0.417516	0.734828	Environmental Information Processing	Signal transduction
12	map04071	Sphingolipid signaling pathway	KEGG PATHWAY	12/1261	157/18102	0.412781	0.734893	Environmental Information Processing	Signal transduction
3	map00360	Phenylalanine metabolism	KEGG PATHWAY	3/1261	33/18102	0.406512	0.736504	Metabolism	Amino acid metabolism
3	map04320	Dorso-ventral axis formation	KEGG PATHWAY	3/1261	33/18102	0.406512	0.736504	Organismal Systems	Development and regeneration
4	map00790	Folate biosynthesis	KEGG PATHWAY	4/1261	47/18102	0.416126	0.736591	Metabolism	Metabolism of cofactors and vitamins
11	map04722	Neurotrophin signaling pathway	KEGG PATHWAY	11/1261	143/18102	0.411855	0.737508	Organismal Systems	Nervous system
4	map03440	Homologous recombination	KEGG PATHWAY	4/1261	46/18102	0.40008	0.737871	Genetic Information Processing	Replication and repair
4	map00565	Ether lipid metabolism	KEGG PATHWAY	4/1261	46/18102	0.40008	0.737871	Metabolism	Lipid metabolism
4	map04215	Apoptosis - multiple species	KEGG PATHWAY	4/1261	46/18102	0.40008	0.737871	Cellular Processes	Cell growth and death
8	map01524	Platinum drug resistance	KEGG PATHWAY	8/1261	104/18102	0.439049	0.763996	Human Diseases	Drug resistance: antineoplastic
5	map00270	Cysteine and methionine metabolism	KEGG PATHWAY	5/1261	63/18102	0.449409	0.777629	Metabolism	Amino acid metabolism
7	map05218	Melanoma	KEGG PATHWAY	7/1261	93/18102	0.472961	0.81381	Human Diseases	Cancer: specific types
5	map03410	Base excision repair	KEGG PATHWAY	5/1261	65/18102	0.476949	0.816113	Genetic Information Processing	Replication and repair
7	map05134	Legionellosis	KEGG PATHWAY	7/1261	95/18102	0.495642	0.838778	Human Diseases	Infectious disease: bacterial
4	map00071	Fatty acid degradation	KEGG PATHWAY	4/1261	52/18102	0.494454	0.841391	Metabolism	Lipid metabolism
22	map05163	Human cytomegalovirus infection	KEGG PATHWAY	22/1261	312/18102	0.508496	0.842025	Human Diseases	Infectious disease: viral
25	map04144	Endocytosis	KEGG PATHWAY	25/1261	354/18102	0.501796	0.844553	Cellular Processes	Transport and catabolism
17	map04218	Cellular senescence	KEGG PATHWAY	17/1261	240/18102	0.507938	0.845648	Cellular Processes	Cell growth and death
2	map00515	Mannose type O-glycan biosynthesis	KEGG PATHWAY	2/1261	24/18102	0.505717	0.846526	Metabolism	Glycan biosynthesis and metabolism
1	map00400	Phenylalanine, tyrosine and tryptophan biosynthesis	KEGG PATHWAY	1/1261	10/18102	0.51434	0.847148	Metabolism	Amino acid metabolism
11	map04152	AMPK signaling pathway	KEGG PATHWAY	11/1261	155/18102	0.519617	0.851287	Environmental Information Processing	Signal transduction
2	map00534	Glycosaminoglycan biosynthesis - heparan sulfate / heparin	KEGG PATHWAY	2/1261	25/18102	0.527861	0.860219	Metabolism	Glycan biosynthesis and metabolism
12	map04910	Insulin signaling pathway	KEGG PATHWAY	12/1261	171/18102	0.532589	0.863354	Organismal Systems	Endocrine system
7	map04260	Cardiac muscle contraction	KEGG PATHWAY	7/1261	100/18102	0.550852	0.888285	Organismal Systems	Circulatory system
40	map04151	PI3K-Akt signaling pathway	KEGG PATHWAY	40/1261	582/18102	0.559941	0.898239	Environmental Information Processing	Signal transduction
5	map00561	Glycerolipid metabolism	KEGG PATHWAY	5/1261	72/18102	0.569016	0.908066	Metabolism	Lipid metabolism
10	map04142	Lysosome	KEGG PATHWAY	10/1261	147/18102	0.577822	0.917367	Cellular Processes	Transport and catabolism
1	map00750	Vitamin B6 metabolism	KEGG PATHWAY	1/1261	13/18102	0.608982	0.961879	Metabolism	Metabolism of cofactors and vitamins
9	map04750	Inflammatory mediator regulation of TRP channels	KEGG PATHWAY	9/1261	137/18102	0.621085	0.97599	Organismal Systems	Sensory system
5	map04214	Apoptosis - fly	KEGG PATHWAY	5/1261	77/18102	0.629325	0.978951	Cellular Processes	Cell growth and death
5	map05221	Acute myeloid leukemia	KEGG PATHWAY	5/1261	78/18102	0.640754	0.981851	Human Diseases	Cancer: specific types
5	map05213	Endometrial cancer	KEGG PATHWAY	5/1261	78/18102	0.640754	0.981851	Human Diseases	Cancer: specific types
2	map04966	Collecting duct acid secretion	KEGG PATHWAY	2/1261	30/18102	0.628153	0.982087	Organismal Systems	Excretory system
9	map04928	Parathyroid hormone synthesis, secretion and action	KEGG PATHWAY	9/1261	139/18102	0.638433	0.983187	Organismal Systems	Endocrine system
1	map00430	Taurine and hypotaurine metabolism	KEGG PATHWAY	1/1261	14/18102	0.63624	0.984733	Metabolism	Metabolism of other amino acids
5	map05230	Central carbon metabolism in cancer	KEGG PATHWAY	5/1261	79/18102	0.65196	0.989181	Human Diseases	Cancer: overview
6	map05212	Pancreatic cancer	KEGG PATHWAY	6/1261	95/18102	0.656727	0.991528	Human Diseases	Cancer: specific types
5	map00310	Lysine degradation	KEGG PATHWAY	5/1261	80/18102	0.662942	0.99603	Metabolism	Amino acid metabolism
7	map04912	GnRH signaling pathway	KEGG PATHWAY	7/1261	112/18102	0.670927	1	Organismal Systems	Endocrine system
3	map00350	Tyrosine metabolism	KEGG PATHWAY	3/1261	49/18102	0.672982	1	Metabolism	Amino acid metabolism
4	map00982	Drug metabolism - cytochrome P450	KEGG PATHWAY	4/1261	68/18102	0.706326	1	Metabolism	Xenobiotics biodegradation and metabolism
2	map00062	Fatty acid elongation	KEGG PATHWAY	2/1261	35/18102	0.711064	1	Metabolism	Lipid metabolism
3	map00591	Linoleic acid metabolism	KEGG PATHWAY	3/1261	52/18102	0.711842	1	Metabolism	Lipid metabolism
5	map04720	Long-term potentiation	KEGG PATHWAY	5/1261	85/18102	0.714399	1	Organismal Systems	Nervous system
3	map05219	Bladder cancer	KEGG PATHWAY	3/1261	53/18102	0.723976	1	Human Diseases	Cancer: specific types
4	map04622	RIG-I-like receptor signaling pathway	KEGG PATHWAY	4/1261	70/18102	0.727668	1	Organismal Systems	Immune system
18	map05203	Viral carcinogenesis	KEGG PATHWAY	18/1261	290/18102	0.728511	1	Human Diseases	Cancer: overview
39	map04015	Rap1 signaling pathway	KEGG PATHWAY	39/1261	609/18102	0.733106	1	Environmental Information Processing	Signal transduction
3	map04973	Carbohydrate digestion and absorption	KEGG PATHWAY	3/1261	54/18102	0.735707	1	Organismal Systems	Digestive system
6	map04012	ErbB signaling pathway	KEGG PATHWAY	6/1261	106/18102	0.756188	1	Environmental Information Processing	Signal transduction
6	map00564	Glycerophospholipid metabolism	KEGG PATHWAY	6/1261	106/18102	0.756188	1	Metabolism	Lipid metabolism
2	map03020	RNA polymerase	KEGG PATHWAY	2/1261	39/18102	0.76573	1	Genetic Information Processing	Transcription
5	map05214	Glioma	KEGG PATHWAY	5/1261	93/18102	0.784661	1	Human Diseases	Cancer: specific types
2	map04614	Renin-angiotensin system	KEGG PATHWAY	2/1261	41/18102	0.789532	1	Organismal Systems	Endocrine system
1	map00532	Glycosaminoglycan biosynthesis - chondroitin sulfate / dermatan sulfate	KEGG PATHWAY	1/1261	22/18102	0.79597	1	Metabolism	Glycan biosynthesis and metabolism
1	map00730	Thiamine metabolism	KEGG PATHWAY	1/1261	22/18102	0.79597	1	Metabolism	Metabolism of cofactors and vitamins
9	map05160	Hepatitis C	KEGG PATHWAY	9/1261	161/18102	0.797442	1	Human Diseases	Infectious disease: viral
16	map05206	MicroRNAs in cancer	KEGG PATHWAY	16/1261	278/18102	0.819523	1	Human Diseases	Cancer: overview
3	map03050	Proteasome	KEGG PATHWAY	3/1261	64/18102	0.832257	1	Genetic Information Processing	Folding, sorting and degradation
3	map04961	Endocrine and other factor-regulated calcium reabsorption	KEGG PATHWAY	3/1261	64/18102	0.832257	1	Organismal Systems	Excretory system
5	map05220	Chronic myeloid leukemia	KEGG PATHWAY	5/1261	100/18102	0.83445	1	Human Diseases	Cancer: specific types
10	map04915	Estrogen signaling pathway	KEGG PATHWAY	10/1261	186/18102	0.842153	1	Organismal Systems	Endocrine system
5	map04211	Longevity regulating pathway	KEGG PATHWAY	5/1261	103/18102	0.852706	1	Organismal Systems	Aging
2	map04960	Aldosterone-regulated sodium reabsorption	KEGG PATHWAY	2/1261	48/18102	0.856814	1	Organismal Systems	Excretory system
2	map04340	Hedgehog signaling pathway	KEGG PATHWAY	2/1261	48/18102	0.856814	1	Environmental Information Processing	Signal transduction
5	map05211	Renal cell carcinoma	KEGG PATHWAY	5/1261	105/18102	0.863922	1	Human Diseases	Cancer: specific types
11	map04932	Non-alcoholic fatty liver disease (NAFLD)	KEGG PATHWAY	11/1261	208/18102	0.865172	1	Human Diseases	Endocrine and metabolic disease
4	map00140	Steroid hormone biosynthesis	KEGG PATHWAY	4/1261	88/18102	0.869948	1	Metabolism	Lipid metabolism
5	map01521	EGFR tyrosine kinase inhibitor resistance	KEGG PATHWAY	5/1261	107/18102	0.874411	1	Human Diseases	Drug resistance: antineoplastic
4	map04212	Longevity regulating pathway - worm	KEGG PATHWAY	4/1261	89/18102	0.875528	1	Organismal Systems	Aging
13	map05034	Alcoholism	KEGG PATHWAY	13/1261	245/18102	0.878887	1	Human Diseases	Substance dependence
31	map04810	Regulation of actin cytoskeleton	KEGG PATHWAY	31/1261	535/18102	0.880397	1	Cellular Processes	Cell motility
2	map00600	Sphingolipid metabolism	KEGG PATHWAY	2/1261	52/18102	0.885807	1	Metabolism	Lipid metabolism
1	map04977	Vitamin digestion and absorption	KEGG PATHWAY	1/1261	31/18102	0.893575	1	Organismal Systems	Digestive system
1	map00900	Terpenoid backbone biosynthesis	KEGG PATHWAY	1/1261	31/18102	0.893575	1	Metabolism	Metabolism of terpenoids and polyketides
1	map04341	Hedgehog signaling pathway - fly	KEGG PATHWAY	1/1261	31/18102	0.893575	1	Environmental Information Processing	Signal transduction
28	map05414	Dilated cardiomyopathy (DCM)	KEGG PATHWAY	28/1261	497/18102	0.901484	1	Human Diseases	Cardiovascular disease
22	map04670	Leukocyte transendothelial migration	KEGG PATHWAY	22/1261	401/18102	0.90266	1	Organismal Systems	Immune system
1	map04744	Phototransduction	KEGG PATHWAY	1/1261	33/18102	0.90791	1	Organismal Systems	Sensory system
1	map00040	Pentose and glucuronate interconversions	KEGG PATHWAY	1/1261	33/18102	0.90791	1	Metabolism	Carbohydrate metabolism
2	map04913	Ovarian steroidogenesis	KEGG PATHWAY	2/1261	56/18102	0.909277	1	Organismal Systems	Endocrine system
2	map04330	Notch signaling pathway	KEGG PATHWAY	2/1261	58/18102	0.919241	1	Environmental Information Processing	Signal transduction
1	map03060	Protein export	KEGG PATHWAY	1/1261	35/18102	0.920315	1	Genetic Information Processing	Folding, sorting and degradation
1	map00860	Porphyrin and chlorophyll metabolism	KEGG PATHWAY	1/1261	36/18102	0.925877	1	Metabolism	Metabolism of cofactors and vitamins
1	map00630	Glyoxylate and dicarboxylate metabolism	KEGG PATHWAY	1/1261	36/18102	0.925877	1	Metabolism	Carbohydrate metabolism
18	map05412	Arrhythmogenic right ventricular cardiomyopathy (ARVC)	KEGG PATHWAY	18/1261	348/18102	0.929334	1	Human Diseases	Cardiovascular disease
1	map00020	Citrate cycle (TCA cycle)	KEGG PATHWAY	1/1261	37/18102	0.931051	1	Metabolism	Carbohydrate metabolism
1	map00030	Pentose phosphate pathway	KEGG PATHWAY	1/1261	38/18102	0.935863	1	Metabolism	Carbohydrate metabolism
2	map00280	Valine, leucine and isoleucine degradation	KEGG PATHWAY	2/1261	62/18102	0.936157	1	Metabolism	Amino acid metabolism
24	map04921	Oxytocin signaling pathway	KEGG PATHWAY	24/1261	454/18102	0.940175	1	Organismal Systems	Endocrine system
1	map04130	SNARE interactions in vesicular transport	KEGG PATHWAY	1/1261	39/18102	0.940341	1	Genetic Information Processing	Folding, sorting and degradation
1	map00500	Starch and sucrose metabolism	KEGG PATHWAY	1/1261	40/18102	0.944506	1	Metabolism	Carbohydrate metabolism
8	map04150	mTOR signaling pathway	KEGG PATHWAY	8/1261	184/18102	0.947682	1	Environmental Information Processing	Signal transduction
23	map05165	Human papillomavirus infection	KEGG PATHWAY	23/1261	445/18102	0.950544	1	Human Diseases	Infectious disease: viral
5	map04922	Glucagon signaling pathway	KEGG PATHWAY	5/1261	135/18102	0.962757	1	Organismal Systems	Endocrine system
1	map00052	Galactose metabolism	KEGG PATHWAY	1/1261	46/18102	0.964055	1	Metabolism	Carbohydrate metabolism
17	map05410	Hypertrophic cardiomyopathy (HCM)	KEGG PATHWAY	17/1261	357/18102	0.966457	1	Human Diseases	Cardiovascular disease
2	map04978	Mineral absorption	KEGG PATHWAY	2/1261	76/18102	0.972539	1	Organismal Systems	Digestive system
35	map04145	Phagosome	KEGG PATHWAY	35/1261	670/18102	0.973989	1	Cellular Processes	Transport and catabolism
6	map00010	Glycolysis / Gluconeogenesis	KEGG PATHWAY	6/1261	165/18102	0.976421	1	Metabolism	Carbohydrate metabolism
1	map00970	Aminoacyl-tRNA biosynthesis	KEGG PATHWAY	1/1261	52/18102	0.976721	1	Genetic Information Processing	Translation
1	map00051	Fructose and mannose metabolism	KEGG PATHWAY	1/1261	54/18102	0.97986	1	Metabolism	Carbohydrate metabolism
1	map00650	Butanoate metabolism	KEGG PATHWAY	1/1261	56/18102	0.982576	1	Metabolism	Carbohydrate metabolism
1	map04962	Vasopressin-regulated water reabsorption	KEGG PATHWAY	1/1261	56/18102	0.982576	1	Organismal Systems	Excretory system
2	map04213	Longevity regulating pathway - multiple species	KEGG PATHWAY	2/1261	86/18102	0.985209	1	Organismal Systems	Aging
1	map00510	N-Glycan biosynthesis	KEGG PATHWAY	1/1261	59/18102	0.98598	1	Metabolism	Glycan biosynthesis and metabolism
20	map04611	Platelet activation	KEGG PATHWAY	20/1261	439/18102	0.98651	1	Organismal Systems	Immune system
21	map05418	Fluid shear stress and atherosclerosis	KEGG PATHWAY	21/1261	463/18102	0.988942	1	Human Diseases	Cardiovascular disease
2	map03008	Ribosome biogenesis in eukaryotes	KEGG PATHWAY	2/1261	96/18102	0.992117	1	Genetic Information Processing	Translation
10	map04217	Necroptosis	KEGG PATHWAY	10/1261	270/18102	0.99229	1	Cellular Processes	Cell growth and death
11	map05016	Huntington disease	KEGG PATHWAY	11/1261	295/18102	0.993845	1	Human Diseases	Neurodegenerative disease
6	map04140	Autophagy - animal	KEGG PATHWAY	6/1261	195/18102	0.994267	1	Cellular Processes	Transport and catabolism
7	map04066	HIF-1 signaling pathway	KEGG PATHWAY	7/1261	219/18102	0.994981	1	Environmental Information Processing	Signal transduction
21	map05164	Influenza A	KEGG PATHWAY	21/1261	496/18102	0.996255	1	Human Diseases	Infectious disease: viral
2	map03018	RNA degradation	KEGG PATHWAY	2/1261	121/18102	0.998423	1	Genetic Information Processing	Folding, sorting and degradation
13	map05132	Salmonella infection	KEGG PATHWAY	13/1261	368/18102	0.998466	1	Human Diseases	Infectious disease: bacterial
10	map05010	Alzheimer disease	KEGG PATHWAY	10/1261	313/18102	0.998819	1	Human Diseases	Neurodegenerative disease
6	map05012	Parkinson disease	KEGG PATHWAY	6/1261	231/18102	0.999081	1	Human Diseases	Neurodegenerative disease
6	map04120	Ubiquitin mediated proteolysis	KEGG PATHWAY	6/1261	232/18102	0.999129	1	Genetic Information Processing	Folding, sorting and degradation
2	map03015	mRNA surveillance pathway	KEGG PATHWAY	2/1261	133/18102	0.999282	1	Genetic Information Processing	Translation
19	map04510	Focal adhesion	KEGG PATHWAY	19/1261	508/18102	0.999386	1	Cellular Processes	Cellular community - eukaryotes
15	map04390	Hippo signaling pathway	KEGG PATHWAY	15/1261	446/18102	0.999692	1	Environmental Information Processing	Signal transduction
14	map04210	Apoptosis	KEGG PATHWAY	14/1261	456/18102	0.999921	1	Cellular Processes	Cell growth and death
9	map04520	Adherens junction	KEGG PATHWAY	9/1261	360/18102	0.999959	1	Cellular Processes	Cellular community - eukaryotes
13	map05225	Hepatocellular carcinoma	KEGG PATHWAY	13/1261	470/18102	0.999985	1	Human Diseases	Cancer: specific types
3	map04141	Protein processing in endoplasmic reticulum	KEGG PATHWAY	3/1261	224/18102	0.999986	1	Genetic Information Processing	Folding, sorting and degradation
8	map04391	Hippo signaling pathway - fly	KEGG PATHWAY	8/1261	362/18102	0.99999	1	Environmental Information Processing	Signal transduction
8	map05100	Bacterial invasion of epithelial cells	KEGG PATHWAY	8/1261	362/18102	0.99999	1	Human Diseases	Infectious disease: bacterial
7	map05130	Pathogenic Escherichia coli infection	KEGG PATHWAY	7/1261	344/18102	0.999993	1	Human Diseases	Infectious disease: bacterial
2	map00190	Oxidative phosphorylation	KEGG PATHWAY	2/1261	208/18102	0.999995	1	Metabolism	Energy metabolism
3	map03013	RNA transport	KEGG PATHWAY	3/1261	242/18102	0.999996	1	Genetic Information Processing	Translation
12	map04530	Tight junction	KEGG PATHWAY	12/1261	494/18102	0.999999	1	Cellular Processes	Cellular community - eukaryotes
6	map05131	Shigellosis	KEGG PATHWAY	6/1261	347/18102	0.999999	1	Human Diseases	Infectious disease: bacterial
13	map05205	Proteoglycans in cancer	KEGG PATHWAY	13/1261	521/18102	0.999999	1	Human Diseases	Cancer: overview
1	map03040	Spliceosome	KEGG PATHWAY	1/1261	226/18102	1	1	Genetic Information Processing	Transcription
6	map04919	Thyroid hormone signaling pathway	KEGG PATHWAY	6/1261	405/18102	1	1	Organismal Systems	Endocrine system
3	map05110	Vibrio cholerae infection	KEGG PATHWAY	3/1261	337/18102	1	1	Human Diseases	Infectious disease: bacterial
2	map04745	Phototransduction - fly	KEGG PATHWAY	2/1261	308/18102	1	1	Organismal Systems	Sensory system
9	map04714	Thermogenesis	KEGG PATHWAY	9/1261	597/18102	1	1	Organismal Systems	Environmental adaptation
3	map03010	Ribosome	KEGG PATHWAY	3/1261	815/18102	1	1	Genetic Information Processing	Translation
7	map04740	Olfactory transduction	KEGG PATHWAY	7/1261	1540/18102	1	1	Organismal Systems	Sensory system
