# Supplementary material for: Xuedan Sustained Release Pellets Ameliorate Dextran Sulfate Sodium–Induced Ulcerative Colitis in Rats by Targeting Gut Microbiota and MAPK Signaling Pathways
Source: Front Pharmacol. 2022 Apr 20;13:833972. doi: 10.3389/fphar.2022.833972 (PMC9149600; doi:10.3389/fphar.2022.833972)
Supplement: Supplementary file 2 [file Table2.XLS]

## Sheet: KEGG富集分析统计表
Num	Pathway id	Description	Database	Ratio_in_study	Ratio_in_pop	Pvalue	Padjust	First Category	Second Category
258	map04010	MAPK signaling pathway	KEGG PATHWAY	258/9734	353/18102	4.18875e-14	1.39066e-11	Environmental Information Processing	Signal transduction
437	map05200	Pathways in cancer	KEGG PATHWAY	437/9734	647/18102	2.8688e-13	4.7622e-11	Human Diseases	Cancer: overview
118	map04110	Cell cycle	KEGG PATHWAY	118/9734	144/18102	1.01697e-12	6.75269e-11	Cellular Processes	Cell growth and death
255	map04144	Endocytosis	KEGG PATHWAY	255/9734	354/18102	8.97752e-13	7.45134e-11	Cellular Processes	Transport and catabolism
312	map05165	Human papillomavirus infection	KEGG PATHWAY	312/9734	445/18102	7.64776e-13	8.46352e-11	Human Diseases	Infectious disease: viral
159	map00230	Purine metabolism	KEGG PATHWAY	159/9734	211/18102	6.42936e-11	3.55758e-09	Metabolism	Nucleotide metabolism
116	map04142	Lysosome	KEGG PATHWAY	116/9734	147/18102	1.73537e-10	8.23063e-09	Cellular Processes	Transport and catabolism
99	map04668	TNF signaling pathway	KEGG PATHWAY	99/9734	122/18102	2.03651e-10	8.45151e-09	Environmental Information Processing	Signal transduction
100	map04933	AGE-RAGE signaling pathway in diabetic complications	KEGG PATHWAY	100/9734	126/18102	1.7533e-09	5.82096e-08	Human Diseases	Endocrine and metabolic disease
114	map04380	Osteoclast differentiation	KEGG PATHWAY	114/9734	147/18102	1.70672e-09	6.29591e-08	Organismal Systems	Development and regeneration
84	map04211	Longevity regulating pathway	KEGG PATHWAY	84/9734	103/18102	3.01147e-09	9.08916e-08	Organismal Systems	Aging
156	map04662	B cell receptor signaling pathway	KEGG PATHWAY	156/9734	214/18102	5.99446e-09	1.65847e-07	Organismal Systems	Immune system
210	map04072	Phospholipase D signaling pathway	KEGG PATHWAY	210/9734	301/18102	8.20621e-09	2.09574e-07	Environmental Information Processing	Signal transduction
47	map00970	Aminoacyl-tRNA biosynthesis	KEGG PATHWAY	47/9734	52/18102	1.29724e-08	2.26675e-07	Genetic Information Processing	Translation
95	map00240	Pyrimidine metabolism	KEGG PATHWAY	95/9734	121/18102	1.24773e-08	2.30137e-07	Metabolism	Nucleotide metabolism
120	map04068	FoxO signaling pathway	KEGG PATHWAY	120/9734	159/18102	1.18613e-08	2.31645e-07	Environmental Information Processing	Signal transduction
216	map05163	Human cytomegalovirus infection	KEGG PATHWAY	216/9734	312/18102	1.40943e-08	2.33966e-07	Human Diseases	Infectious disease: viral
171	map04666	Fc gamma R-mediated phagocytosis	KEGG PATHWAY	171/9734	239/18102	1.12981e-08	2.34435e-07	Organismal Systems	Immune system
70	map00562	Inositol phosphate metabolism	KEGG PATHWAY	70/9734	84/18102	1.07178e-08	2.37221e-07	Metabolism	Carbohydrate metabolism
149	map04062	Chemokine signaling pathway	KEGG PATHWAY	149/9734	204/18102	1.05106e-08	2.4925e-07	Organismal Systems	Immune system
65	map05221	Acute myeloid leukemia	KEGG PATHWAY	65/9734	78/18102	3.61396e-08	5.7135e-07	Human Diseases	Cancer: specific types
144	map04360	Axon guidance	KEGG PATHWAY	144/9734	199/18102	4.98577e-08	7.52398e-07	Organismal Systems	Development and regeneration
49	map03460	Fanconi anemia pathway	KEGG PATHWAY	49/9734	56/18102	7.49957e-08	1.08255e-06	Genetic Information Processing	Replication and repair
374	map04151	PI3K-Akt signaling pathway	KEGG PATHWAY	374/9734	582/18102	1.23598e-07	1.70977e-06	Environmental Information Processing	Signal transduction
76	map03008	Ribosome biogenesis in eukaryotes	KEGG PATHWAY	76/9734	96/18102	1.89879e-07	2.33481e-06	Genetic Information Processing	Translation
158	map04141	Protein processing in endoplasmic reticulum	KEGG PATHWAY	158/9734	224/18102	1.84446e-07	2.35523e-06	Genetic Information Processing	Folding, sorting and degradation
86	map04070	Phosphatidylinositol signaling system	KEGG PATHWAY	86/9734	111/18102	1.8206e-07	2.41776e-06	Environmental Information Processing	Signal transduction
87	map01522	Endocrine resistance	KEGG PATHWAY	87/9734	113/18102	2.56787e-07	2.93977e-06	Human Diseases	Drug resistance: antineoplastic
152	map05140	Leishmaniasis	KEGG PATHWAY	152/9734	215/18102	2.48926e-07	2.95155e-06	Human Diseases	Infectious disease: parasitic
75	map05212	Pancreatic cancer	KEGG PATHWAY	75/9734	95/18102	2.81729e-07	3.1178e-06	Human Diseases	Cancer: specific types
115	map04071	Sphingolipid signaling pathway	KEGG PATHWAY	115/9734	157/18102	3.80982e-07	4.0802e-06	Environmental Information Processing	Signal transduction
106	map04722	Neurotrophin signaling pathway	KEGG PATHWAY	106/9734	143/18102	4.02257e-07	4.17341e-06	Organismal Systems	Nervous system
166	map04218	Cellular senescence	KEGG PATHWAY	166/9734	240/18102	7.07532e-07	7.1182e-06	Cellular Processes	Cell growth and death
86	map05210	Colorectal cancer	KEGG PATHWAY	86/9734	113/18102	7.33589e-07	7.16328e-06	Human Diseases	Cancer: specific types
123	map04910	Insulin signaling pathway	KEGG PATHWAY	123/9734	171/18102	7.84784e-07	7.44423e-06	Organismal Systems	Endocrine system
196	map05203	Viral carcinogenesis	KEGG PATHWAY	196/9734	290/18102	9.79818e-07	9.0361e-06	Human Diseases	Cancer: overview
112	map04152	AMPK signaling pathway	KEGG PATHWAY	112/9734	155/18102	1.67139e-06	1.49974e-05	Environmental Information Processing	Signal transduction
95	map04931	Insulin resistance	KEGG PATHWAY	95/9734	129/18102	2.59098e-06	2.2637e-05	Human Diseases	Endocrine and metabolic disease
117	map04926	Relaxin signaling pathway	KEGG PATHWAY	117/9734	164/18102	2.83372e-06	2.35198e-05	Organismal Systems	Endocrine system
84	map05222	Small cell lung cancer	KEGG PATHWAY	84/9734	112/18102	2.82252e-06	2.40276e-05	Human Diseases	Cancer: specific types
46	map03420	Nucleotide excision repair	KEGG PATHWAY	46/9734	55/18102	3.06014e-06	2.47797e-05	Genetic Information Processing	Replication and repair
41	map04340	Hedgehog signaling pathway	KEGG PATHWAY	41/9734	48/18102	3.5759e-06	2.63822e-05	Environmental Information Processing	Signal transduction
76	map05220	Chronic myeloid leukemia	KEGG PATHWAY	76/9734	100/18102	3.52366e-06	2.65876e-05	Human Diseases	Cancer: specific types
144	map04932	Non-alcoholic fatty liver disease (NAFLD)	KEGG PATHWAY	144/9734	208/18102	3.47554e-06	2.68344e-05	Human Diseases	Endocrine and metabolic disease
87	map05231	Choline metabolism in cancer	KEGG PATHWAY	87/9734	117/18102	3.47435e-06	2.74639e-05	Human Diseases	Cancer: overview
71	map04146	Peroxisome	KEGG PATHWAY	71/9734	93/18102	5.53353e-06	3.99377e-05	Cellular Processes	Transport and catabolism
53	map04370	VEGF signaling pathway	KEGG PATHWAY	53/9734	66/18102	6.26104e-06	4.42269e-05	Environmental Information Processing	Signal transduction
146	map04664	Fc epsilon RI signaling pathway	KEGG PATHWAY	146/9734	213/18102	7.084e-06	4.89977e-05	Organismal Systems	Immune system
128	map04150	mTOR signaling pathway	KEGG PATHWAY	128/9734	184/18102	8.12309e-06	5.50381e-05	Environmental Information Processing	Signal transduction
79	map04012	ErbB signaling pathway	KEGG PATHWAY	79/9734	106/18102	8.36434e-06	5.55392e-05	Environmental Information Processing	Signal transduction
50	map00280	Valine, leucine and isoleucine degradation	KEGG PATHWAY	50/9734	62/18102	9.15027e-06	5.95665e-05	Metabolism	Amino acid metabolism
119	map05161	Hepatitis B	KEGG PATHWAY	119/9734	170/18102	1.04499e-05	6.67184e-05	Human Diseases	Infectious disease: viral
43	map00600	Sphingolipid metabolism	KEGG PATHWAY	43/9734	52/18102	1.16498e-05	7.29762e-05	Metabolism	Lipid metabolism
76	map04013	MAPK signaling pathway - fly	KEGG PATHWAY	76/9734	102/18102	1.25514e-05	7.71681e-05	Environmental Information Processing	Signal transduction
118	map04934	Cushing syndrome	KEGG PATHWAY	118/9734	169/18102	1.3744e-05	8.14822e-05	Human Diseases	Endocrine and metabolic disease
134	map04140	Autophagy - animal	KEGG PATHWAY	134/9734	195/18102	1.35968e-05	8.20751e-05	Cellular Processes	Transport and catabolism
102	map05145	Toxoplasmosis	KEGG PATHWAY	102/9734	144/18102	1.97729e-05	0.000115169	Human Diseases	Infectious disease: parasitic
63	map05223	Non-small cell lung cancer	KEGG PATHWAY	63/9734	83/18102	2.55829e-05	0.00014644	Human Diseases	Cancer: specific types
171	map05146	Amoebiasis	KEGG PATHWAY	171/9734	258/18102	2.68953e-05	0.000151343	Human Diseases	Infectious disease: parasitic
55	map05120	Epithelial cell signaling in Helicobacter pylori infection	KEGG PATHWAY	55/9734	71/18102	3.01305e-05	0.000163989	Human Diseases	Infectious disease: bacterial
229	map05152	Tuberculosis	KEGG PATHWAY	229/9734	356/18102	2.9945e-05	0.000165695	Human Diseases	Infectious disease: bacterial
81	map04912	GnRH signaling pathway	KEGG PATHWAY	81/9734	112/18102	4.21559e-05	0.000225738	Organismal Systems	Endocrine system
46	map04330	Notch signaling pathway	KEGG PATHWAY	46/9734	58/18102	4.68257e-05	0.000242908	Environmental Information Processing	Signal transduction
115	map04310	Wnt signaling pathway	KEGG PATHWAY	115/9734	167/18102	4.67679e-05	0.000246459	Environmental Information Processing	Signal transduction
77	map04620	Toll-like receptor signaling pathway	KEGG PATHWAY	77/9734	106/18102	5.03944e-05	0.000253499	Organismal Systems	Immune system
77	map00564	Glycerophospholipid metabolism	KEGG PATHWAY	77/9734	106/18102	5.03944e-05	0.000253499	Metabolism	Lipid metabolism
33	map04130	SNARE interactions in vesicular transport	KEGG PATHWAY	33/9734	39/18102	5.00752e-05	0.000255769	Genetic Information Processing	Folding, sorting and degradation
59	map05213	Endometrial cancer	KEGG PATHWAY	59/9734	78/18102	5.49276e-05	0.000268176	Human Diseases	Cancer: specific types
66	map04115	p53 signaling pathway	KEGG PATHWAY	66/9734	89/18102	5.95422e-05	0.000286493	Cellular Processes	Cell growth and death
25	map00563	Glycosylphosphatidylinositol (GPI)-anchor biosynthesis	KEGG PATHWAY	25/9734	28/18102	6.7424e-05	0.000319782	Metabolism	Glycan biosynthesis and metabolism
43	map00520	Amino sugar and nucleotide sugar metabolism	KEGG PATHWAY	43/9734	54/18102	6.94877e-05	0.000324928	Metabolism	Carbohydrate metabolism
60	map04920	Adipocytokine signaling pathway	KEGG PATHWAY	60/9734	80/18102	7.33422e-05	0.000338189	Organismal Systems	Endocrine system
179	map05167	Kaposi sarcoma-associated herpesvirus infection	KEGG PATHWAY	179/9734	275/18102	8.26352e-05	0.00037582	Human Diseases	Infectious disease: viral
77	map01521	EGFR tyrosine kinase inhibitor resistance	KEGG PATHWAY	77/9734	107/18102	8.53387e-05	0.000382871	Human Diseases	Drug resistance: antineoplastic
92	map05215	Prostate cancer	KEGG PATHWAY	92/9734	132/18102	0.00013063	0.000578257	Human Diseases	Cancer: specific types
65	map04212	Longevity regulating pathway - worm	KEGG PATHWAY	65/9734	89/18102	0.00014656	0.000640237	Organismal Systems	Aging
37	map03440	Homologous recombination	KEGG PATHWAY	37/9734	46/18102	0.000152226	0.000656353	Genetic Information Processing	Replication and repair
63	map04213	Longevity regulating pathway - multiple species	KEGG PATHWAY	63/9734	86/18102	0.000159542	0.000679074	Organismal Systems	Aging
14	map00533	Glycosaminoglycan biosynthesis - keratan sulfate	KEGG PATHWAY	14/9734	14/18102	0.000168279	0.000707196	Metabolism	Glycan biosynthesis and metabolism
181	map05168	Herpes simplex virus 1 infection	KEGG PATHWAY	181/9734	282/18102	0.000230713	0.00094564	Human Diseases	Infectious disease: viral
36	map03030	DNA replication	KEGG PATHWAY	36/9734	45/18102	0.000230061	0.000954751	Genetic Information Processing	Replication and repair
58	map05230	Central carbon metabolism in cancer	KEGG PATHWAY	58/9734	79/18102	0.000260773	0.00105581	Human Diseases	Cancer: overview
45	map00510	N-Glycan biosynthesis	KEGG PATHWAY	45/9734	59/18102	0.000301187	0.00120475	Metabolism	Glycan biosynthesis and metabolism
166	map04650	Natural killer cell mediated cytotoxicity	KEGG PATHWAY	166/9734	258/18102	0.000344546	0.00134576	Organismal Systems	Immune system
37	map05216	Thyroid cancer	KEGG PATHWAY	37/9734	47/18102	0.000344531	0.00136172	Human Diseases	Cancer: specific types
50	map04923	Regulation of lipolysis in adipocytes	KEGG PATHWAY	50/9734	67/18102	0.00035598	0.00137425	Organismal Systems	Endocrine system
154	map04640	Hematopoietic cell lineage	KEGG PATHWAY	154/9734	238/18102	0.000377697	0.00144132	Organismal Systems	Immune system
81	map04914	Progesterone-mediated oocyte maturation	KEGG PATHWAY	81/9734	117/18102	0.000452319	0.00165022	Organismal Systems	Endocrine system
156	map03013	RNA transport	KEGG PATHWAY	156/9734	242/18102	0.000449603	0.00165854	Genetic Information Processing	Translation
26	map04341	Hedgehog signaling pathway - fly	KEGG PATHWAY	26/9734	31/18102	0.000440781	0.00166295	Environmental Information Processing	Signal transduction
73	map01524	Platinum drug resistance	KEGG PATHWAY	73/9734	104/18102	0.000447926	0.00167092	Human Diseases	Drug resistance: antineoplastic
28	map00760	Nicotinate and nicotinamide metabolism	KEGG PATHWAY	28/9734	34/18102	0.000480536	0.00173411	Metabolism	Metabolism of cofactors and vitamins
99	map04114	Oocyte meiosis	KEGG PATHWAY	99/9734	147/18102	0.000538965	0.00192405	Cellular Processes	Cell growth and death
114	map05143	African trypanosomiasis	KEGG PATHWAY	114/9734	172/18102	0.000552843	0.00195259	Human Diseases	Infectious disease: parasitic
29	map00860	Porphyrin and chlorophyll metabolism	KEGG PATHWAY	29/9734	36/18102	0.00077025	0.00266378	Metabolism	Metabolism of cofactors and vitamins
114	map05226	Gastric cancer	KEGG PATHWAY	114/9734	173/18102	0.000767885	0.00268356	Human Diseases	Cancer: specific types
51	map04622	RIG-I-like receptor signaling pathway	KEGG PATHWAY	51/9734	70/18102	0.000816823	0.00279572	Organismal Systems	Immune system
20	map00514	Other types of O-glycan biosynthesis	KEGG PATHWAY	20/9734	23/18102	0.000841554	0.00285098	Metabolism	Glycan biosynthesis and metabolism
57	map00310	Lysine degradation	KEGG PATHWAY	57/9734	80/18102	0.00102928	0.00345174	Metabolism	Amino acid metabolism
24	map00601	Glycosphingolipid biosynthesis - lacto and neolacto series	KEGG PATHWAY	24/9734	29/18102	0.00108795	0.00354117	Metabolism	Glycan biosynthesis and metabolism
17	map00450	Selenocompound metabolism	KEGG PATHWAY	17/9734	19/18102	0.00108668	0.00357204	Metabolism	Metabolism of other amino acids
65	map05214	Glioma	KEGG PATHWAY	65/9734	93/18102	0.00108086	0.00358847	Human Diseases	Cancer: specific types
32	map00640	Propanoate metabolism	KEGG PATHWAY	32/9734	41/18102	0.00113991	0.00363896	Metabolism	Carbohydrate metabolism
55	map04214	Apoptosis - fly	KEGG PATHWAY	55/9734	77/18102	0.00113895	0.00367118	Cellular Processes	Cell growth and death
28	map00062	Fatty acid elongation	KEGG PATHWAY	28/9734	35/18102	0.00116783	0.00369257	Metabolism	Lipid metabolism
14	map00603	Glycosphingolipid biosynthesis - globo and isoglobo series	KEGG PATHWAY	14/9734	15/18102	0.00125818	0.00394072	Metabolism	Glycan biosynthesis and metabolism
39	map00071	Fatty acid degradation	KEGG PATHWAY	39/9734	52/18102	0.00133531	0.00414322	Metabolism	Lipid metabolism
140	map04621	NOD-like receptor signaling pathway	KEGG PATHWAY	140/9734	219/18102	0.00141196	0.00434047	Organismal Systems	Immune system
113	map05224	Breast cancer	KEGG PATHWAY	113/9734	174/18102	0.00176303	0.0052732	Human Diseases	Cancer: specific types
29	map00020	Citrate cycle (TCA cycle)	KEGG PATHWAY	29/9734	37/18102	0.00173146	0.0052738	Metabolism	Carbohydrate metabolism
27	map04710	Circadian rhythm	KEGG PATHWAY	27/9734	34/18102	0.00175983	0.00531147	Organismal Systems	Environmental adaptation
38	map04624	Toll and Imd signaling pathway	KEGG PATHWAY	38/9734	51/18102	0.00188936	0.00560062	Organismal Systems	Immune system
10	map00920	Sulfur metabolism	KEGG PATHWAY	10/9734	10/18102	0.00201706	0.00592624	Metabolism	Energy metabolism
78	map04916	Melanogenesis	KEGG PATHWAY	78/9734	116/18102	0.00213898	0.0062293	Organismal Systems	Endocrine system
90	map04625	C-type lectin receptor signaling pathway	KEGG PATHWAY	90/9734	136/18102	0.00216048	0.00623722	Organismal Systems	Immune system
143	map03040	Spliceosome	KEGG PATHWAY	143/9734	226/18102	0.00229355	0.00656429	Genetic Information Processing	Transcription
30	map03020	RNA polymerase	KEGG PATHWAY	30/9734	39/18102	0.00245132	0.00689694	Genetic Information Processing	Transcription
39	map05219	Bladder cancer	KEGG PATHWAY	39/9734	53/18102	0.00244077	0.00692594	Human Diseases	Cancer: specific types
28	map04392	Hippo signaling pathway - multiple species	KEGG PATHWAY	28/9734	36/18102	0.00255937	0.00714042	Environmental Information Processing	Signal transduction
28	map00630	Glyoxylate and dicarboxylate metabolism	KEGG PATHWAY	28/9734	36/18102	0.00255937	0.00714042	Metabolism	Carbohydrate metabolism
128	map04022	cGMP-PKG signaling pathway	KEGG PATHWAY	128/9734	201/18102	0.00270326	0.0074172	Environmental Information Processing	Signal transduction
75	map04925	Aldosterone synthesis and secretion	KEGG PATHWAY	75/9734	112/18102	0.00304816	0.00829498	Organismal Systems	Endocrine system
17	map00511	Other glycan degradation	KEGG PATHWAY	17/9734	20/18102	0.00359246	0.00969672	Metabolism	Glycan biosynthesis and metabolism
51	map04927	Cortisol synthesis and secretion	KEGG PATHWAY	51/9734	73/18102	0.0036496	0.00977152	Organismal Systems	Endocrine system
131	map00190	Oxidative phosphorylation	KEGG PATHWAY	131/9734	208/18102	0.00432875	0.0114972	Metabolism	Energy metabolism
45	map03050	Proteasome	KEGG PATHWAY	45/9734	64/18102	0.00508804	0.0134066	Genetic Information Processing	Folding, sorting and degradation
54	map04924	Renin secretion	KEGG PATHWAY	54/9734	79/18102	0.00583952	0.0152655	Organismal Systems	Endocrine system
96	map04550	Signaling pathways regulating pluripotency of stem cells	KEGG PATHWAY	96/9734	150/18102	0.00699262	0.0178581	Cellular Processes	Cellular community - eukaryotes
64	map04512	ECM-receptor interaction	KEGG PATHWAY	64/9734	96/18102	0.00691112	0.0179257	Environmental Information Processing	Signaling molecules and interaction
8	map04711	Circadian rhythm - fly	KEGG PATHWAY	8/9734	8/18102	0.00698137	0.0179676	Organismal Systems	Environmental adaptation
62	map05218	Melanoma	KEGG PATHWAY	62/9734	93/18102	0.0077736	0.019701	Human Diseases	Cancer: specific types
141	map04024	cAMP signaling pathway	KEGG PATHWAY	141/9734	228/18102	0.00809809	0.0203679	Environmental Information Processing	Signal transduction
69	map05211	Renal cell carcinoma	KEGG PATHWAY	69/9734	105/18102	0.00857232	0.0212389	Human Diseases	Cancer: specific types
102	map05160	Hepatitis C	KEGG PATHWAY	102/9734	161/18102	0.00854324	0.021326	Human Diseases	Infectious disease: viral
19	map00515	Mannose type O-glycan biosynthesis	KEGG PATHWAY	19/9734	24/18102	0.00927924	0.0228201	Metabolism	Glycan biosynthesis and metabolism
33	map00565	Ether lipid metabolism	KEGG PATHWAY	33/9734	46/18102	0.0097734	0.0238586	Metabolism	Lipid metabolism
58	map05133	Pertussis	KEGG PATHWAY	58/9734	87/18102	0.00984595	0.0238603	Human Diseases	Infectious disease: bacterial
68	map04350	TGF-beta signaling pathway	KEGG PATHWAY	68/9734	104/18102	0.0106717	0.0256739	Environmental Information Processing	Signal transduction
78	map04540	Gap junction	KEGG PATHWAY	78/9734	121/18102	0.0109725	0.0262077	Cellular Processes	Cellular community - eukaryotes
56	map00480	Glutathione metabolism	KEGG PATHWAY	56/9734	84/18102	0.0110877	0.0262937	Metabolism	Metabolism of other amino acids
10	map00072	Synthesis and degradation of ketone bodies	KEGG PATHWAY	10/9734	11/18102	0.0113465	0.0267165	Metabolism	Lipid metabolism
66	map00983	Drug metabolism - other enzymes	KEGG PATHWAY	66/9734	101/18102	0.0119959	0.0280468	Metabolism	Xenobiotics biodegradation and metabolism
12	map03450	Non-homologous end-joining	KEGG PATHWAY	12/9734	14/18102	0.013541	0.0314379	Genetic Information Processing	Replication and repair
141	map05012	Parkinson disease	KEGG PATHWAY	141/9734	231/18102	0.0149372	0.0344387	Human Diseases	Neurodegenerative disease
23	map00900	Terpenoid backbone biosynthesis	KEGG PATHWAY	23/9734	31/18102	0.0161958	0.0370827	Metabolism	Metabolism of terpenoids and polyketides
28	map01040	Biosynthesis of unsaturated fatty acids	KEGG PATHWAY	28/9734	39/18102	0.0165933	0.0377328	Metabolism	Lipid metabolism
21	map03430	Mismatch repair	KEGG PATHWAY	21/9734	28/18102	0.017715	0.039739	Genetic Information Processing	Replication and repair
84	map03015	mRNA surveillance pathway	KEGG PATHWAY	84/9734	133/18102	0.0177115	0.0400014	Genetic Information Processing	Translation
100	map04728	Dopaminergic synapse	KEGG PATHWAY	100/9734	161/18102	0.019597	0.0436658	Organismal Systems	Nervous system
17	map00532	Glycosaminoglycan biosynthesis - chondroitin sulfate / dermatan sulfate	KEGG PATHWAY	17/9734	22/18102	0.0206494	0.0457041	Metabolism	Glycan biosynthesis and metabolism
22	map00512	Mucin type O-glycan biosynthesis	KEGG PATHWAY	22/9734	30/18102	0.022846	0.0502308	Metabolism	Glycan biosynthesis and metabolism
54	map04918	Thyroid hormone synthesis	KEGG PATHWAY	54/9734	83/18102	0.0243839	0.0532596	Organismal Systems	Endocrine system
140	map04120	Ubiquitin mediated proteolysis	KEGG PATHWAY	140/9734	232/18102	0.0249386	0.0541151	Genetic Information Processing	Folding, sorting and degradation
55	map04720	Long-term potentiation	KEGG PATHWAY	55/9734	85/18102	0.0268019	0.0577808	Organismal Systems	Nervous system
76	map03018	RNA degradation	KEGG PATHWAY	76/9734	121/18102	0.0275136	0.0589324	Genetic Information Processing	Folding, sorting and degradation
84	map04922	Glucagon signaling pathway	KEGG PATHWAY	84/9734	135/18102	0.0288205	0.061336	Organismal Systems	Endocrine system
43	map00330	Arginine and proline metabolism	KEGG PATHWAY	43/9734	65/18102	0.0290129	0.0613522	Metabolism	Amino acid metabolism
8	map04122	Sulfur relay system	KEGG PATHWAY	8/9734	9/18102	0.032811	0.0689446	Genetic Information Processing	Folding, sorting and degradation
83	map04725	Cholinergic synapse	KEGG PATHWAY	83/9734	134/18102	0.0340745	0.0711493	Organismal Systems	Nervous system
45	map05217	Basal cell carcinoma	KEGG PATHWAY	45/9734	69/18102	0.0358427	0.0743736	Human Diseases	Cancer: specific types
105	map04261	Adrenergic signaling in cardiomyocytes	KEGG PATHWAY	105/9734	173/18102	0.0388932	0.0802022	Organismal Systems	Circulatory system
17	map00670	One carbon pool by folate	KEGG PATHWAY	17/9734	23/18102	0.0397484	0.0814596	Metabolism	Metabolism of cofactors and vitamins
43	map04623	Cytosolic DNA-sensing pathway	KEGG PATHWAY	43/9734	66/18102	0.0405227	0.082537	Organismal Systems	Immune system
37	map00620	Pyruvate metabolism	KEGG PATHWAY	37/9734	56/18102	0.0421419	0.0853117	Metabolism	Carbohydrate metabolism
32	map04960	Aldosterone-regulated sodium reabsorption	KEGG PATHWAY	32/9734	48/18102	0.0483928	0.0973722	Organismal Systems	Excretory system
94	map04270	Vascular smooth muscle contraction	KEGG PATHWAY	94/9734	155/18102	0.0497306	0.0994611	Organismal Systems	Circulatory system
27	map00410	beta-Alanine metabolism	KEGG PATHWAY	27/9734	40/18102	0.0552635	0.109865	Metabolism	Metabolism of other amino acids
299	map05169	Epstein-Barr virus infection	KEGG PATHWAY	299/9734	522/18102	0.0561385	0.11094	Human Diseases	Infectious disease: viral
62	map04970	Salivary secretion	KEGG PATHWAY	62/9734	100/18102	0.0594323	0.116755	Organismal Systems	Digestive system
172	map05016	Huntington disease	KEGG PATHWAY	172/9734	295/18102	0.0645479	0.126058	Human Diseases	Neurodegenerative disease
45	map04721	Synaptic vesicle cycle	KEGG PATHWAY	45/9734	71/18102	0.0650433	0.126283	Organismal Systems	Nervous system
84	map04928	Parathyroid hormone synthesis, secretion and action	KEGG PATHWAY	84/9734	139/18102	0.0669355	0.129201	Organismal Systems	Endocrine system
53	map04730	Long-term depression	KEGG PATHWAY	53/9734	85/18102	0.0685951	0.131639	Organismal Systems	Nervous system
12	map00604	Glycosphingolipid biosynthesis - ganglio series	KEGG PATHWAY	12/9734	16/18102	0.0709305	0.135339	Metabolism	Glycan biosynthesis and metabolism
36	map04962	Vasopressin-regulated water reabsorption	KEGG PATHWAY	36/9734	56/18102	0.0732173	0.138904	Organismal Systems	Excretory system
74	map04713	Circadian entrainment	KEGG PATHWAY	74/9734	122/18102	0.0746019	0.140726	Organismal Systems	Environmental adaptation
30	map04215	Apoptosis - multiple species	KEGG PATHWAY	30/9734	46/18102	0.0782303	0.146737	Cellular Processes	Cell growth and death
10	map00130	Ubiquinone and other terpenoid-quinone biosynthesis	KEGG PATHWAY	10/9734	13/18102	0.0789778	0.147307	Metabolism	Metabolism of cofactors and vitamins
37	map04930	Type II diabetes mellitus	KEGG PATHWAY	37/9734	58/18102	0.079812	0.148031	Human Diseases	Endocrine and metabolic disease
18	map04964	Proximal tubule bicarbonate reclamation	KEGG PATHWAY	18/9734	26/18102	0.0816566	0.150611	Organismal Systems	Excretory system
18	map00531	Glycosaminoglycan degradation	KEGG PATHWAY	18/9734	26/18102	0.0816566	0.150611	Metabolism	Glycan biosynthesis and metabolism
82	map04750	Inflammatory mediator regulation of TRP channels	KEGG PATHWAY	82/9734	137/18102	0.0885989	0.16162	Organismal Systems	Sensory system
28	map05020	Prion diseases	KEGG PATHWAY	28/9734	43/18102	0.0891886	0.161807	Human Diseases	Neurodegenerative disease
25	map00030	Pentose phosphate pathway	KEGG PATHWAY	25/9734	38/18102	0.0917973	0.165634	Metabolism	Carbohydrate metabolism
22	map04320	Dorso-ventral axis formation	KEGG PATHWAY	22/9734	33/18102	0.0937775	0.167388	Organismal Systems	Development and regeneration
16	map00220	Arginine biosynthesis	KEGG PATHWAY	16/9734	23/18102	0.0937457	0.168235	Metabolism	Amino acid metabolism
17	map00534	Glycosaminoglycan biosynthesis - heparan sulfate / heparin	KEGG PATHWAY	17/9734	25/18102	0.109046	0.1936	Metabolism	Glycan biosynthesis and metabolism
31	map00260	Glycine, serine and threonine metabolism	KEGG PATHWAY	31/9734	49/18102	0.116353	0.205475	Metabolism	Amino acid metabolism
116	map05340	Primary immunodeficiency	KEGG PATHWAY	116/9734	200/18102	0.12819	0.223995	Human Diseases	Immune disease
111	map04723	Retrograde endocannabinoid signaling	KEGG PATHWAY	111/9734	191/18102	0.127614	0.224169	Organismal Systems	Nervous system
42	map05014	Amyotrophic lateral sclerosis (ALS)	KEGG PATHWAY	42/9734	69/18102	0.143623	0.249648	Human Diseases	Neurodegenerative disease
10	map00061	Fatty acid biosynthesis	KEGG PATHWAY	10/9734	14/18102	0.144956	0.250653	Metabolism	Lipid metabolism
43	map00980	Metabolism of xenobiotics by cytochrome P450	KEGG PATHWAY	43/9734	71/18102	0.151306	0.260278	Metabolism	Xenobiotics biodegradation and metabolism
3	map00780	Biotin metabolism	KEGG PATHWAY	3/9734	3/18102	0.155465	0.266053	Metabolism	Metabolism of cofactors and vitamins
3	map00471	D-Glutamine and D-glutamate metabolism	KEGG PATHWAY	3/9734	3/18102	0.155465	0.266053	Metabolism	Metabolism of other amino acids
3	map00981	Insect hormone biosynthesis	KEGG PATHWAY	3/9734	3/18102	0.155465	0.266053	Metabolism	Metabolism of terpenoids and polyketides
228	map05166	Human T-cell leukemia virus 1 infection	KEGG PATHWAY	228/9734	405/18102	0.163637	0.275774	Human Diseases	Infectious disease: viral
41	map00982	Drug metabolism - cytochrome P450	KEGG PATHWAY	41/9734	68/18102	0.168936	0.283266	Metabolism	Xenobiotics biodegradation and metabolism
38	map00270	Cysteine and methionine metabolism	KEGG PATHWAY	38/9734	63/18102	0.179733	0.299856	Metabolism	Amino acid metabolism
34	map04913	Ovarian steroidogenesis	KEGG PATHWAY	34/9734	56/18102	0.18184	0.300353	Organismal Systems	Endocrine system
56	map04911	Insulin secretion	KEGG PATHWAY	56/9734	95/18102	0.18129	0.300942	Organismal Systems	Endocrine system
15	map00100	Steroid biosynthesis	KEGG PATHWAY	15/9734	23/18102	0.186651	0.306772	Metabolism	Lipid metabolism
77	map04724	Glutamatergic synapse	KEGG PATHWAY	77/9734	133/18102	0.192434	0.314719	Organismal Systems	Nervous system
9	map00750	Vitamin B6 metabolism	KEGG PATHWAY	9/9734	13/18102	0.2017	0.328257	Metabolism	Metabolism of cofactors and vitamins
25	map00250	Alanine, aspartate and glutamate metabolism	KEGG PATHWAY	25/9734	41/18102	0.221561	0.35882	Metabolism	Amino acid metabolism
14	map00770	Pantothenate and CoA biosynthesis	KEGG PATHWAY	14/9734	22/18102	0.238763	0.384803	Metabolism	Metabolism of cofactors and vitamins
32	map05030	Cocaine addiction	KEGG PATHWAY	32/9734	54/18102	0.251222	0.402926	Human Diseases	Substance dependence
42	map00561	Glycerolipid metabolism	KEGG PATHWAY	42/9734	72/18102	0.255556	0.407907	Metabolism	Lipid metabolism
12	map00910	Nitrogen metabolism	KEGG PATHWAY	12/9734	19/18102	0.279298	0.44367	Metabolism	Energy metabolism
45	map05031	Amphetamine addiction	KEGG PATHWAY	45/9734	78/18102	0.281077	0.444369	Human Diseases	Substance dependence
21	map03060	Protein export	KEGG PATHWAY	21/9734	35/18102	0.285689	0.449521	Genetic Information Processing	Folding, sorting and degradation
2	map00261	Monobactam biosynthesis	KEGG PATHWAY	2/9734	2/18102	0.289141	0.452805	Metabolism	Biosynthesis of other secondary metabolites
5	map00440	Phosphonate and phosphinate metabolism	KEGG PATHWAY	5/9734	7/18102	0.292951	0.456618	Metabolism	Metabolism of other amino acids
30	map04979	Cholesterol metabolism	KEGG PATHWAY	30/9734	52/18102	0.335438	0.520399	Organismal Systems	Digestive system
15	map00592	alpha-Linolenic acid metabolism	KEGG PATHWAY	15/9734	25/18102	0.337709	0.521486	Metabolism	Lipid metabolism
37	map03410	Base excision repair	KEGG PATHWAY	37/9734	65/18102	0.351017	0.539526	Genetic Information Processing	Replication and repair
55	map04917	Prolactin signaling pathway	KEGG PATHWAY	55/9734	98/18102	0.358041	0.545274	Organismal Systems	Endocrine system
49	map04971	Gastric acid secretion	KEGG PATHWAY	49/9734	87/18102	0.356602	0.545584	Organismal Systems	Digestive system
3	map00290	Valine, leucine and isoleucine biosynthesis	KEGG PATHWAY	3/9734	4/18102	0.371101	0.562582	Metabolism	Amino acid metabolism
23	map00500	Starch and sucrose metabolism	KEGG PATHWAY	23/9734	40/18102	0.378163	0.570682	Metabolism	Carbohydrate metabolism
13	map00730	Thiamine metabolism	KEGG PATHWAY	13/9734	22/18102	0.389533	0.585181	Metabolism	Metabolism of cofactors and vitamins
43	map03022	Basal transcription factors	KEGG PATHWAY	43/9734	77/18102	0.402141	0.6014	Genetic Information Processing	Transcription
26	map01523	Antifolate resistance	KEGG PATHWAY	26/9734	46/18102	0.412008	0.610654	Human Diseases	Drug resistance: antineoplastic
63	map04972	Pancreatic secretion	KEGG PATHWAY	63/9734	114/18102	0.411571	0.612743	Organismal Systems	Digestive system
64	map04657	IL-17 signaling pathway	KEGG PATHWAY	64/9734	116/18102	0.417818	0.616513	Organismal Systems	Immune system
105	map04630	Jak-STAT signaling pathway	KEGG PATHWAY	105/9734	192/18102	0.428213	0.629057	Environmental Information Processing	Signal transduction
16	map00340	Histidine metabolism	KEGG PATHWAY	16/9734	28/18102	0.435243	0.636567	Metabolism	Amino acid metabolism
30	map00051	Fructose and mannose metabolism	KEGG PATHWAY	30/9734	54/18102	0.451113	0.656884	Metabolism	Carbohydrate metabolism
35	map04961	Endocrine and other factor-regulated calcium reabsorption	KEGG PATHWAY	35/9734	64/18102	0.49273	0.714352	Organismal Systems	Excretory system
8	map00430	Taurine and hypotaurine metabolism	KEGG PATHWAY	8/9734	14/18102	0.508767	0.734394	Metabolism	Metabolism of other amino acids
47	map04976	Bile secretion	KEGG PATHWAY	47/9734	87/18102	0.525331	0.751767	Organismal Systems	Digestive system
9	map00740	Riboflavin metabolism	KEGG PATHWAY	9/9734	16/18102	0.523194	0.75195	Metabolism	Metabolism of cofactors and vitamins
55	map05032	Morphine addiction	KEGG PATHWAY	55/9734	102/18102	0.528631	0.753243	Human Diseases	Substance dependence
1	map00333	Prodigiosin biosynthesis	KEGG PATHWAY	1/9734	1/18102	0.537731	0.756469	Metabolism	Biosynthesis of other secondary metabolites
1	map00523	Polyketide sugar unit biosynthesis	KEGG PATHWAY	1/9734	1/18102	0.537731	0.756469	Metabolism	Metabolism of terpenoids and polyketides
64	map04974	Protein digestion and absorption	KEGG PATHWAY	64/9734	119/18102	0.536888	0.758497	Organismal Systems	Digestive system
10	map00120	Primary bile acid biosynthesis	KEGG PATHWAY	10/9734	18/18102	0.535996	0.760474	Metabolism	Lipid metabolism
2	map00785	Lipoic acid metabolism	KEGG PATHWAY	2/9734	3/18102	0.556492	0.776282	Metabolism	Metabolism of cofactors and vitamins
29	map00380	Tryptophan metabolism	KEGG PATHWAY	29/9734	54/18102	0.559641	0.777409	Metabolism	Amino acid metabolism
16	map04966	Collecting duct acid secretion	KEGG PATHWAY	16/9734	30/18102	0.59304	0.820372	Organismal Systems	Excretory system
53	map04260	Cardiac muscle contraction	KEGG PATHWAY	53/9734	100/18102	0.601872	0.829135	Organismal Systems	Circulatory system
77	map04726	Serotonergic synapse	KEGG PATHWAY	77/9734	146/18102	0.631734	0.866676	Organismal Systems	Nervous system
24	map00052	Galactose metabolism	KEGG PATHWAY	24/9734	46/18102	0.643757	0.879537	Metabolism	Carbohydrate metabolism
235	map05202	Transcriptional misregulation in cancer	KEGG PATHWAY	235/9734	444/18102	0.659365	0.897169	Human Diseases	Cancer: overview
165	map05010	Alzheimer disease	KEGG PATHWAY	165/9734	313/18102	0.668844	0.906352	Human Diseases	Neurodegenerative disease
51	map04727	GABAergic synapse	KEGG PATHWAY	51/9734	98/18102	0.672992	0.908266	Organismal Systems	Nervous system
97	map04915	Estrogen signaling pathway	KEGG PATHWAY	97/9734	186/18102	0.698889	0.939397	Organismal Systems	Endocrine system
9	map00053	Ascorbate and aldarate metabolism	KEGG PATHWAY	9/9734	18/18102	0.712255	0.953503	Metabolism	Carbohydrate metabolism
53	map03320	PPAR signaling pathway	KEGG PATHWAY	53/9734	103/18102	0.716811	0.955748	Organismal Systems	Endocrine system
3	map00232	Caffeine metabolism	KEGG PATHWAY	3/9734	6/18102	0.724105	0.961612	Metabolism	Biosynthesis of other secondary metabolites
27	map04973	Carbohydrate digestion and absorption	KEGG PATHWAY	27/9734	54/18102	0.756422	1	Organismal Systems	Digestive system
48	map05134	Legionellosis	KEGG PATHWAY	48/9734	95/18102	0.77048	1	Human Diseases	Infectious disease: bacterial
49	map04610	Complement and coagulation cascades	KEGG PATHWAY	49/9734	97/18102	0.772825	1	Organismal Systems	Immune system
170	map04064	NF-kappa B signaling pathway	KEGG PATHWAY	170/9734	328/18102	0.779033	1	Environmental Information Processing	Signal transduction
16	map00040	Pentose and glucuronate interconversions	KEGG PATHWAY	16/9734	33/18102	0.78392	1	Metabolism	Carbohydrate metabolism
23	map00790	Folate biosynthesis	KEGG PATHWAY	23/9734	47/18102	0.791945	1	Metabolism	Metabolism of cofactors and vitamins
2	map00524	Neomycin, kanamycin and gentamicin biosynthesis	KEGG PATHWAY	2/9734	5/18102	0.856148	1	Metabolism	Biosynthesis of other secondary metabolites
23	map00350	Tyrosine metabolism	KEGG PATHWAY	23/9734	49/18102	0.865183	1	Metabolism	Amino acid metabolism
19	map04614	Renin-angiotensin system	KEGG PATHWAY	19/9734	41/18102	0.866906	1	Organismal Systems	Endocrine system
14	map04977	Vitamin digestion and absorption	KEGG PATHWAY	14/9734	31/18102	0.873333	1	Organismal Systems	Digestive system
191	map04014	Ras signaling pathway	KEGG PATHWAY	191/9734	376/18102	0.888977	1	Environmental Information Processing	Signal transduction
36	map04978	Mineral absorption	KEGG PATHWAY	36/9734	76/18102	0.891901	1	Organismal Systems	Digestive system
133	map04217	Necroptosis	KEGG PATHWAY	133/9734	270/18102	0.940486	1	Cellular Processes	Cell growth and death
48	map00590	Arachidonic acid metabolism	KEGG PATHWAY	48/9734	103/18102	0.940769	1	Metabolism	Lipid metabolism
29	map02010	ABC transporters	KEGG PATHWAY	29/9734	65/18102	0.94591	1	Environmental Information Processing	Membrane transport
50	map05204	Chemical carcinogenesis	KEGG PATHWAY	50/9734	108/18102	0.951333	1	Human Diseases	Cancer: overview
220	map04020	Calcium signaling pathway	KEGG PATHWAY	220/9734	442/18102	0.96028	1	Environmental Information Processing	Signal transduction
21	map04975	Fat digestion and absorption	KEGG PATHWAY	21/9734	50/18102	0.965066	1	Organismal Systems	Digestive system
13	map00360	Phenylalanine metabolism	KEGG PATHWAY	13/9734	33/18102	0.966634	1	Metabolism	Amino acid metabolism
3	map00400	Phenylalanine, tyrosine and tryptophan biosynthesis	KEGG PATHWAY	3/9734	10/18102	0.967274	1	Metabolism	Amino acid metabolism
11	map04950	Maturity onset diabetes of the young	KEGG PATHWAY	11/9734	29/18102	0.971335	1	Human Diseases	Endocrine and metabolic disease
23	map00650	Butanoate metabolism	KEGG PATHWAY	23/9734	56/18102	0.979451	1	Metabolism	Carbohydrate metabolism
132	map05206	MicroRNAs in cancer	KEGG PATHWAY	132/9734	278/18102	0.985284	1	Human Diseases	Cancer: overview
193	map05162	Measles	KEGG PATHWAY	193/9734	399/18102	0.987332	1	Human Diseases	Infectious disease: viral
20	map00591	Linoleic acid metabolism	KEGG PATHWAY	20/9734	52/18102	0.990821	1	Metabolism	Lipid metabolism
112	map05034	Alcoholism	KEGG PATHWAY	112/9734	245/18102	0.995442	1	Human Diseases	Substance dependence
134	map04060	Cytokine-cytokine receptor interaction	KEGG PATHWAY	134/9734	290/18102	0.996097	1	Environmental Information Processing	Signaling molecules and interaction
154	map05323	Rheumatoid arthritis	KEGG PATHWAY	154/9734	332/18102	0.997248	1	Human Diseases	Immune disease
135	map05150	Staphylococcus aureus infection	KEGG PATHWAY	135/9734	296/18102	0.998104	1	Human Diseases	Infectious disease: bacterial
125	map04672	Intestinal immune network for IgA production	KEGG PATHWAY	125/9734	277/18102	0.998485	1	Organismal Systems	Immune system
33	map00140	Steroid hormone biosynthesis	KEGG PATHWAY	33/9734	88/18102	0.999262	1	Metabolism	Lipid metabolism
92	map05142	Chagas disease (American trypanosomiasis)	KEGG PATHWAY	92/9734	216/18102	0.999638	1	Human Diseases	Infectious disease: parasitic
143	map05330	Allograft rejection	KEGG PATHWAY	143/9734	323/18102	0.999773	1	Human Diseases	Immune disease
92	map04066	HIF-1 signaling pathway	KEGG PATHWAY	92/9734	219/18102	0.999826	1	Environmental Information Processing	Signal transduction
8	map04744	Phototransduction	KEGG PATHWAY	8/9734	33/18102	0.999865	1	Organismal Systems	Sensory system
88	map04660	T cell receptor signaling pathway	KEGG PATHWAY	88/9734	212/18102	0.999878	1	Organismal Systems	Immune system
78	map04658	Th1 and Th2 cell differentiation	KEGG PATHWAY	78/9734	193/18102	0.999931	1	Organismal Systems	Immune system
131	map04514	Cell adhesion molecules (CAMs)	KEGG PATHWAY	131/9734	304/18102	0.999933	1	Environmental Information Processing	Signaling molecules and interaction
29	map00830	Retinol metabolism	KEGG PATHWAY	29/9734	88/18102	0.999975	1	Metabolism	Metabolism of cofactors and vitamins
142	map05320	Autoimmune thyroid disease	KEGG PATHWAY	142/9734	334/18102	0.999988	1	Human Diseases	Immune disease
107	map05310	Asthma	KEGG PATHWAY	107/9734	263/18102	0.999993	1	Human Diseases	Immune disease
89	map04659	Th17 cell differentiation	KEGG PATHWAY	89/9734	225/18102	0.999994	1	Organismal Systems	Immune system
172	map05322	Systemic lupus erythematosus	KEGG PATHWAY	172/9734	410/18102	1	1	Human Diseases	Immune disease
57	map00010	Glycolysis / Gluconeogenesis	KEGG PATHWAY	57/9734	165/18102	1	1	Metabolism	Carbohydrate metabolism
26	map04742	Taste transduction	KEGG PATHWAY	26/9734	92/18102	1	1	Organismal Systems	Sensory system
4	map05033	Nicotine addiction	KEGG PATHWAY	4/9734	43/18102	1	1	Human Diseases	Substance dependence
86	map04612	Antigen processing and presentation	KEGG PATHWAY	86/9734	253/18102	1	1	Organismal Systems	Immune system
39	map05144	Malaria	KEGG PATHWAY	39/9734	153/18102	1	1	Human Diseases	Infectious disease: parasitic
181	map04810	Regulation of actin cytoskeleton	KEGG PATHWAY	181/9734	535/18102	1	1	Cellular Processes	Cell motility
188	map04015	Rap1 signaling pathway	KEGG PATHWAY	188/9734	609/18102	1	1	Environmental Information Processing	Signal transduction
127	map04390	Hippo signaling pathway	KEGG PATHWAY	127/9734	446/18102	1	1	Environmental Information Processing	Signal transduction
142	map05164	Influenza A	KEGG PATHWAY	142/9734	496/18102	1	1	Human Diseases	Infectious disease: viral
109	map04919	Thyroid hormone signaling pathway	KEGG PATHWAY	109/9734	405/18102	1	1	Organismal Systems	Endocrine system
73	map04520	Adherens junction	KEGG PATHWAY	73/9734	360/18102	1	1	Cellular Processes	Cellular community - eukaryotes
47	map05110	Vibrio cholerae infection	KEGG PATHWAY	47/9734	337/18102	1	1	Human Diseases	Infectious disease: bacterial
143	map04530	Tight junction	KEGG PATHWAY	143/9734	494/18102	1	1	Cellular Processes	Cellular community - eukaryotes
179	map03010	Ribosome	KEGG PATHWAY	179/9734	815/18102	1	1	Genetic Information Processing	Translation
40	map05321	Inflammatory bowel disease (IBD)	KEGG PATHWAY	40/9734	161/18102	1	1	Human Diseases	Immune disease
25	map04745	Phototransduction - fly	KEGG PATHWAY	25/9734	308/18102	1	1	Organismal Systems	Sensory system
118	map04611	Platelet activation	KEGG PATHWAY	118/9734	439/18102	1	1	Organismal Systems	Immune system
179	map04510	Focal adhesion	KEGG PATHWAY	179/9734	508/18102	1	1	Cellular Processes	Cellular community - eukaryotes
93	map04670	Leukocyte transendothelial migration	KEGG PATHWAY	93/9734	401/18102	1	1	Organismal Systems	Immune system
54	map05332	Graft-versus-host disease	KEGG PATHWAY	54/9734	186/18102	1	1	Human Diseases	Immune disease
35	map04740	Olfactory transduction	KEGG PATHWAY	35/9734	1540/18102	1	1	Organismal Systems	Sensory system
147	map05225	Hepatocellular carcinoma	KEGG PATHWAY	147/9734	470/18102	1	1	Human Diseases	Cancer: specific types
133	map05418	Fluid shear stress and atherosclerosis	KEGG PATHWAY	133/9734	463/18102	1	1	Human Diseases	Cardiovascular disease
176	map05416	Viral myocarditis	KEGG PATHWAY	176/9734	628/18102	1	1	Human Diseases	Cardiovascular disease
154	map05414	Dilated cardiomyopathy (DCM)	KEGG PATHWAY	154/9734	497/18102	1	1	Human Diseases	Cardiovascular disease
56	map05412	Arrhythmogenic right ventricular cardiomyopathy (ARVC)	KEGG PATHWAY	56/9734	348/18102	1	1	Human Diseases	Cardiovascular disease
57	map05410	Hypertrophic cardiomyopathy (HCM)	KEGG PATHWAY	57/9734	357/18102	1	1	Human Diseases	Cardiovascular disease
121	map04921	Oxytocin signaling pathway	KEGG PATHWAY	121/9734	454/18102	1	1	Organismal Systems	Endocrine system
70	map04391	Hippo signaling pathway - fly	KEGG PATHWAY	70/9734	362/18102	1	1	Environmental Information Processing	Signal transduction
94	map04080	Neuroactive ligand-receptor interaction	KEGG PATHWAY	94/9734	322/18102	1	1	Environmental Information Processing	Signaling molecules and interaction
64	map05131	Shigellosis	KEGG PATHWAY	64/9734	347/18102	1	1	Human Diseases	Infectious disease: bacterial
48	map05130	Pathogenic Escherichia coli infection	KEGG PATHWAY	48/9734	344/18102	1	1	Human Diseases	Infectious disease: bacterial
67	map05132	Salmonella infection	KEGG PATHWAY	67/9734	368/18102	1	1	Human Diseases	Infectious disease: bacterial
230	map04714	Thermogenesis	KEGG PATHWAY	230/9734	597/18102	1	1	Organismal Systems	Environmental adaptation
249	map04145	Phagosome	KEGG PATHWAY	249/9734	670/18102	1	1	Cellular Processes	Transport and catabolism
128	map04210	Apoptosis	KEGG PATHWAY	128/9734	456/18102	1	1	Cellular Processes	Cell growth and death
60	map04940	Type I diabetes mellitus	KEGG PATHWAY	60/9734	202/18102	1	1	Human Diseases	Endocrine and metabolic disease
179	map05205	Proteoglycans in cancer	KEGG PATHWAY	179/9734	521/18102	1	1	Human Diseases	Cancer: overview
73	map05100	Bacterial invasion of epithelial cells	KEGG PATHWAY	73/9734	362/18102	1	1	Human Diseases	Infectious disease: bacterial
